# Supplementary material
Source: publisher figshare collection journal article supplement (https://acs.figshare.com/ndownloader/files/17372582)
Supplement: Supplementary file 1 [file 17372582]

## Sheet: PaperInformation
Evaluation of In Silico Multi‐Feature Libraries for Providing Evidence for the Presence of Small Molecules in Synthetic Blinded Samples
Jamie R. Nuñez1, Sean M. Colby1, Dennis G. Thomas1, Malak M. Tfaily1, Nikola Tolic1, Elin M. Ulrich2, Jon R. Sobus2, Thomas O. Metz1,*, Justin G. Teeguarden1,3,*, Ryan S. Renslow1,*
1Earth and Biological Sciences Directorate, Pacific Northwest National Laboratory, Richland, Washington 99354, United States
2U.S. Environmental Protection Agency, Office of Research and Development, National Exposure Research Laboratory, Research Triangle Park, North Carolina 27709, United States
3Department of Environmental and Molecular Toxicology, Oregon State University, Corvallis, Oregon 97331, United States

## Sheet: SuspectLibrary
DTXCID	Name	CASRN	SMILES	Original InChI	Processed InChI	Formula	Exact Mass	[M+H] CCS	[M+Na] CCS	[M-H] CCS	CCS Calculation Method	Mix499	Mix500	Mix501	Mix502	Mix503	Mix504	Mix505	Mix506	Mix507	Mix508
DTXCID0029	Acrylonitrile	107-13-1	C=CC#N	InChI=1S/C3H3N/c1-2-3-4/h2H,1H2	InChI=1S/C3H3N/c1-2-3-4/h2H,1H2	C3H3N	53.0265			95.519	Lite	0	0	0	0	0	0	0	0	0	0
DTXCID301883	Propargyl alcohol	107-19-7	OCC#C	InChI=1S/C3H4O/c1-2-3-4/h1,4H,3H2	InChI=1S/C3H4O/c1-2-3-4/h1,4H,3H2	C3H4O	56.0262	97.0204	96.899	96.5511	Lite	0	0	0	0	0	0	0	0	0	0
DTXCID8023	Acrolein	107-02-8	C=CC=O	InChI=1S/C3H4O/c1-2-3-4/h2-3H,1H2	InChI=1S/C3H4O/c1-2-3-4/h2-3H,1H2	C3H4O	56.0262	96.3559	95.8581		Lite	0	0	0	0	0	0	0	0	0	0
DTXCID102153, DTXCID5023954, DTXCID607292, DTXCID609210, DTXCID707403	Tetrabutyltin, Tributyltin acetate, Dibutyltin dichloride, Butyltin trichloride, Tributyltin chloride	1461-25-2, 56-36-0, 683-18-1, 1118-46-3, 1461-22-9	CCCC[Sn](CCCC)(CCCC)CCCC	InChI=1S/4C4H9.Sn/c4*1-3-4-2;/h4*1,3-4H2,2H3;	InChI=1S/C4H9/c1-3-4-2/h1,3-4H2,2H3	C4H9	57.0704				NA	0	0	0	0	0	0	0	0	0	0
DTXCID505364	Glyoxal	107-22-2	O=CC=O	InChI=1S/C2H2O2/c3-1-2-4/h1-2H	InChI=1S/C2H2O2/c3-1-2-4/h1-2H	C2H2O2	58.0055	94.6465	94.4019	93.9873	Lite	0	0	0	0	0	0	0	0	0	0
DTXCID101482	Acetone	67-64-1	CC(C)=O	InChI=1S/C3H6O/c1-3(2)4/h1-2H3	InChI=1S/C3H6O/c1-3(2)4/h1-2H3	C3H6O	58.0419	97.4258	97.1858	96.8754	Lite	0	0	0	0	0	0	0	0	0	0
DTXCID2044	Allyl alcohol	107-18-6	OCC=C	InChI=1S/C3H6O/c1-2-3-4/h2,4H,1,3H2	InChI=1S/C3H6O/c1-2-3-4/h2,4H,1,3H2	C3H6O	58.0419	98.0813	97.397	97.1131	Lite	0	0	0	0	0	0	0	0	0	0
DTXCID5027221	Thiocyanic acid, ammonium salt	1762-95-4	[NH4+].[S-]C#N	InChI=1S/CHNS.H3N/c2-1-3;/h3H;1H3	InChI=1S/CHNS/c2-1-3/h3H	CHNS	58.983			89.4739	Lite	0	0	0	0	0	0	0	0	0	0
DTXCID5027221	Sodium thiocyanate	540-72-7	[Na+].[S-]C#N	InChI=1S/CHNS.Na/c2-1-3;/h3H;/q;+1/p-1	InChI=1S/CHNS/c2-1-3/h2H	CHNS	58.983	90.7337	90.366	89.4739	Lite	0	0	0	0	0	0	0	0	0	0
DTXCID505	Acetamide	60-35-5	CC(N)=O	InChI=1S/C2H5NO/c1-2(3)4/h1H3,(H2,3,4)	InChI=1S/C2H5NO/c1-2(3)4/h1H3,(H2,3,4)	C2H5NO	59.0371	96.5631	95.8948	95.7613	Lite	0	0	0	0	0	0	0	0	0	0
DTXCID106238	Trimethylamine	75-50-3	CN(C)C	InChI=1S/C3H9N/c1-4(2)3/h1-3H3	InChI=1S/C3H9N/c1-4(2)3/h1-3H3	C3H9N	59.0735	99.1715	98.5626	98.2734	Lite	0	0	0	0	0	0	0	0	0	0
DTXCID905682	Isopropylamine	75-31-0	CC(C)N	InChI=1S/C3H9N/c1-3(2)4/h3H,4H2,1-2H3_x000D_	InChI=1S/C3H9N/c1-3(2)4/h3H,4H2,1-2H3	C3H9N	59.0735	99.4998	98.7692	98.5597	Lite	0	0	0	0	0	0	0	0	0	0
DTXCID009677	Silica	7631-86-9	O=[Si]=O	InChI=1S/O2Si/c1-3-2	InChI=1S/O2Si/c1-3-2	O2Si	59.9668				NA	0	0	0	0	0	0	0	0	0	0
NoDTXCID02, NoDTXCID02, NoDTXCID02, NoDTXCID02, NoDTXCID02, DTXCID304394, DTXCID304394, DTXCID304394, DTXCID4024723, DTXCID5024552	Chromium acetate, basic, Mercury(II) acetate, Zinc acetate, Lead(II) acetate trihydrate, Manganese(II) acetate, Sodium acetate, Acetic acid, Ammonium acetate, Aluminum hydroxide acetate (1:2:1), Aluminum hydroxide acetate (1:1:2)	39430-51-8, 1600-27-7, 557-34-6, 6080-56-4, 638-38-0, 127-09-3, 64-19-7, 631-61-8, 7360-44-3, 142-03-0	CC(=O)O[Cr](O)OC(C)=O.CC(=O)O[Cr](O)OC(C)=O.CC(=O)O[Cr](OC(C)=O)OC(C)=O	InChI=1S/7C2H4O2.3Cr.2H2O/c7*1-2(3)4;;;;;/h7*1H3,(H,3,4);;;;2*1H2/q;;;;;;;3*+3;;/p-9	InChI=1S/C2H4O2/c1-2(3)4/h1H3,(H,3,4)	C2H4O2	60.0211			95.1285	Lite	0	0	0	0	0	0	0	0	0	0
DTXCID305609	Methyl formate	107-31-3	COC=O	InChI=1S/C2H4O2/c1-4-2-3/h2H,1H3	InChI=1S/C2H4O2/c1-4-2-3/h2H,1H3	C2H4O2	60.0211	96.3244	95.3435	94.663	Lite	0	0	0	0	0	0	0	0	0	0
DTXCID901426, DTXCID901426	Carbamide peroxide, Urea	124-43-6, 57-13-6	OO.NC(N)=O	InChI=1S/CH4N2O.H2O2/c2-1(3)4;1-2/h(H4,2,3,4);1-2H	InChI=1S/CH4N2O/c2-1(3)4/h(H4,2,3,4)	CH4N2O	60.0324	94.5137	94.5952	93.8398	Lite	0	0	0	0	0	0	0	0	0	0
DTXCID001739	1-Propanol	71-23-8	CCCO	InChI=1S/C3H8O/c1-2-3-4/h4H,2-3H2,1H3	InChI=1S/C3H8O/c1-2-3-4/h4H,2-3H2,1H3	C3H8O	60.0575	99.301	98.4575	98.3244	Lite	0	0	0	0	0	0	0	0	0	0
DTXCID50762	Isopropanol	67-63-0	CC(C)O	InChI=1S/C3H8O/c1-3(2)4/h3-4H,1-2H3	InChI=1S/C3H8O/c1-3(2)4/h3-4H,1-2H3	C3H8O	60.0575	99.225	98.3669	98.245	Lite	0	0	0	0	0	0	0	0	0	0
DTXCID501881, DTXCID501881	1,2-Ethanediamine dihydriodide, Ethylenediamine	5700-49-2, 107-15-3	I.I.NCCN	InChI=1S/C2H8N2.2HI/c3-1-2-4;;/h1-4H2;2*1H	InChI=1S/C2H8N2/c3-1-2-4/h1-4H2	C2H8N2	60.0687	98.9758	98.1093	97.6983	Lite	0	0	0	0	0	0	0	0	0	0
DTXCID50516	1,1-Dimethylhydrazine	57-14-7	CN(C)N	InChI=1S/C2H8N2/c1-4(2)3/h3H2,1-2H3	InChI=1S/C2H8N2/c1-4(2)3/h3H2,1-2H3	C2H8N2	60.0687	98.0185	97.7462	97.7214	Lite	0	0	0	0	0	0	0	0	0	0
DTXCID40977	Nitromethane	75-52-5	C[N+]([O-])=O	InChI=1S/CH3NO2/c1-2(3)4/h1H3	InChI=1S/CH3NO2/c1-2(3)4/h1H3	CH3NO2	61.0164	95.9259	95.2351	94.7915	Lite	0	0	0	0	0	0	0	0	0	0
DTXCID5027986	Ammonium carbamate	1111-78-0	[NH4+].NC([O-])=O	InChI=1S/CH3NO2.H3N/c2-1(3)4;/h2H2,(H,3,4);1H3	InChI=1S/CH3NO2/c2-1(3)4/h2H2,(H,3,4)	CH3NO2	61.0164			93.8082	Lite	0	0	0	0	0	0	0	0	0	0
DTXCID202000	Ethanolamine	141-43-5	NCCO	InChI=1S/C2H7NO/c3-1-2-4/h4H,1-3H2	InChI=1S/C2H7NO/c3-1-2-4/h4H,1-3H2	C2H7NO	61.0528	98.3704	97.5476	97.2582	Lite	0	0	0	0	0	0	0	0	0	0
NoDTXCID03	Nickel carbonate hydroxide	12607-70-4	[Ni++].O[Ni]O.O[Ni]O.[O-]C([O-])=O	InChI=1S/CH2O3.3Ni.4H2O/c2-1(3)4;;;;;;;/h(H2,2,3,4);;;;4*1H2/q;3*+2;;;;/p-6_x000D_	InChI=1S/CH2O3/c2-1(3)4/h(H2,2,3,4)	CH2O3	62.0004			93.2825	Lite	0	0	0	0	0	0	0	0	0	0
DTXCID10194	Boric acid	10043-35-3	OB(O)O	InChI=1S/BH3O3/c2-1(3)4/h2-4H	InChI=1S/BH3O3/c2-1(3)4/h2-4H	BH3O3	62.0175				NA	0	0	0	0	0	0	0	0	0	0
DTXCID40597	Ethylene glycol	107-21-1	OCCO	InChI=1S/C2H6O2/c3-1-2-4/h3-4H,1-2H2	InChI=1S/C2H6O2/c3-1-2-4/h3-4H,1-2H2	C2H6O2	62.0368	97.2045	96.9388	96.9456	Lite	0	0	0	0	0	0	0	0	0	0
NoDTXCID04, NoDTXCID04, NoDTXCID04, NoDTXCID04, NoDTXCID04	Copper(II) nitrate trihydrate, Magnesium dinitrate hexahydrate, Cadmium dinitrate, Calcium nitrate, Potassium nitrate	10031-43-3, 13446-18-9, 10325-94-7, 10124-37-5, 7757-79-1	O.O.O.[Cu++].[O-][N+]([O-])=O.[O-][N+]([O-])=O	InChI=1S/Cu.2NO3.3H2O/c;2*2-1(3)4;;;/h;;;3*1H2/q+2;2*-1;;;_x000D_	InChI=1S/HNO3/c2-1(3)4/h(H,2,3,4)	HNO3	62.9956				NA	0	0	0	0	0	0	0	0	0	0
DTXCID701907	Propanedinitrile	109-77-3	N#CCC#N	InChI=1S/C3H2N2/c4-2-1-3-5/h1H2	InChI=1S/C3H2N2/c4-2-1-3-5/h1H2	C3H2N2	66.0218			101.264	Lite	0	0	0	0	0	0	0	0	0	0
DTXCID007191	1,3-Cyclopentadiene	542-92-7	C1C=CC=C1	InChI=1S/C5H6/c1-2-4-5-3-1/h1-4H,5H2	InChI=1S/C5H6/c1-2-4-5-3-1/h1-4H,5H2	C5H6	66.047			98.4722	Lite	0	0	0	0	0	0	0	0	0	0
DTXCID104176	Methacrylonitrile	126-98-7	CC(=C)C#N	InChI=1S/C4H5N/c1-4(2)3-5/h1H2,2H3	InChI=1S/C4H5N/c1-4(2)3-5/h1H2,2H3	C4H5N	67.0422			101.379	Lite	0	0	0	0	0	0	0	0	0	0
DTXCID201910	Pyrrole	109-97-7	N1C=CC=C1	InChI=1S/C4H5N/c1-2-4-5-3-1/h1-5H	InChI=1S/C4H5N/c1-2-4-5-3-1/h1-5H	C4H5N	67.0422			97.2455	Lite	0	0	0	0	0	0	0	0	0	0
NoDTXCID05	Sodium chlorite	7758-19-2	[Na+].[O-][Cl]=O	InChI=1S/ClHO2.Na/c2-1-3;/h(H,2,3);/q;+1/p-1	InChI=1S/ClHO2/c2-1-3/h(H,2,3)	ClHO2	67.9665				NA	0	0	0	0	0	0	0	0	0	0
DTXCID809616	Imidazole	288-32-4	N1C=CN=C1	InChI=1S/C3H4N2/c1-2-5-3-4-1/h1-3H,(H,4,5)	InChI=1S/C3H4N2/c1-2-5-3-4-1/h1-3H,(H,4,5)	C3H4N2	68.0374	97.7399	97.1004	96.5617	Lite	0	0	0	0	0	0	0	0	0	0
DTXCID609171	Cyclopentene	142-29-0	C1CC=CC1	InChI=1S/C5H8/c1-2-4-5-3-1/h1-2H,3-5H2	InChI=1S/C5H8/c1-2-4-5-3-1/h1-2H,3-5H2	C5H8	68.0626				NA	0	0	0	0	0	0	0	0	0	0
DTXCID207131	1H-1,2,4-Triazole	288-88-0	N1C=NC=N1	InChI=1S/C2H3N3/c1-3-2-5-4-1/h1-2H,(H,3,4,5)	InChI=1S/C2H3N3/c1-3-2-5-4-1/h1-2H,(H,3,4,5)	C2H3N3	69.0327	97.1382	96.4305	95.8738	Lite	0	0	0	0	0	0	0	0	0	0
DTXCID606461	2-Methylpropanenitrile	78-82-0	CC(C)C#N	InChI=1S/C4H7N/c1-4(2)3-5/h4H,1-2H3	InChI=1S/C4H7N/c1-4(2)3-5/h4H,1-2H3	C4H7N	69.0578			105.178	Lite	0	0	0	0	0	0	0	0	0	0
DTXCID0030291	Cyclopropanecarboxaldehyde	1489-69-6	O=CC1CC1	InChI=1S/C4H6O/c5-3-4-1-2-4/h3-4H,1-2H2	InChI=1S/C4H6O/c5-3-4-1-2-4/h3-4H,1-2H2	C4H6O	70.0419	103.066	102.56	102.282	Lite	0	0	0	0	0	0	0	0	0	0
DTXCID005432	Lactonitrile	78-97-7	CC(O)C#N	InChI=1/C3H5NO/c1-3(5)2-4/h3,5H,1H3	InChI=1/C3H5NO/c1-3(5)2-4/h3,5H,1H3	C3H5NO	71.0371	103.802	103.382	103.225	Lite	0	0	0	0	0	0	0	0	0	0
DTXCID405433	3-Hydroxypropanenitrile	109-78-4	OCCC#N	InChI=1S/C3H5NO/c4-2-1-3-5/h5H,1,3H2	InChI=1S/C3H5NO/c4-2-1-3-5/h5H,1,3H2	C3H5NO	71.0371	105.013	104.266	104.049	Lite	0	0	0	0	0	0	0	0	0	0
DTXCID6027	Acrylamide	79-06-1	NC(=O)C=C	InChI=1S/C3H5NO/c1-2-3(4)5/h2H,1H2,(H2,4,5)	InChI=1S/C3H5NO/c1-2-3(4)5/h2H,1H2,(H2,4,5)	C3H5NO	71.0371	102.635	102.071	101.969	Lite	0	0	0	0	0	0	0	0	0	0
DTXCID101628	Methyl glyoxal	78-98-8	CC(=O)C=O	InChI=1S/C3H4O2/c1-3(5)2-4/h2H,1H3	InChI=1S/C3H4O2/c1-3(5)2-4/h2H,1H3	C3H4O2	72.0211	102.877	102.632	102.443	Lite	0	0	0	0	0	0	0	0	0	0
DTXCID7024796	(Acryloyloxy)(tributyl)stannane	13331-52-7	CCCC[Sn](CCCC)(CCCC)OC(=O)C=C	InChI=1S/3C4H9.C3H4O2.Sn/c3*1-3-4-2;1-2-3(4)5;/h3*1,3-4H2,2H3;2H,1H2,(H,4,5);/q;;;;+1/p-1	InChI=1S/C3H4O2/c1-2-3(4)5/h2H,1H2,(H,4,5)	C3H4O2	72.0211			101.379	Lite	0	0	0	0	0	0	0	0	0	0
DTXCID801197	beta-Propiolactone	57-57-8	O=C1CCO1	InChI=1S/C3H4O2/c4-3-1-2-5-3/h1-2H2	InChI=1S/C3H4O2/c4-3-1-2-5-3/h1-2H2	C3H4O2	72.0211	100.207	99.8723	99.3798	Lite	0	0	0	0	0	0	0	0	0	0
DTXCID201635	2-Methylpropanal	78-84-2	CC(C)C=O	InChI=1S/C4H8O/c1-4(2)3-5/h3-4H,1-2H3	InChI=1S/C4H8O/c1-4(2)3-5/h3-4H,1-2H3	C4H8O	72.0575	105.539	105.348	105.076	Lite	0	0	0	0	0	0	0	0	0	0
DTXCID40569	1,2-Epoxybutane	106-88-7	CCC1CO1	InChI=1/C4H8O/c1-2-4-3-5-4/h4H,2-3H2,1H3	InChI=1/C4H8O/c1-2-4-3-5-4/h4H,2-3H2,1H3	C4H8O	72.0575	103.83	104.333	103.688	Lite	0	0	0	0	0	0	0	0	0	0
DTXCID501328	Tetrahydrofuran	109-99-9	C1CCOC1	InChI=1S/C4H8O/c1-2-4-5-3-1/h1-4H2	InChI=1S/C4H8O/c1-2-4-5-3-1/h1-4H2	C4H8O	72.0575	101.218	101.148	100.602	Lite	0	0	0	0	0	0	0	0	0	0
DTXCID601513	Butyraldehyde	123-72-8	CCCC=O	InChI=1S/C4H8O/c1-2-3-4-5/h4H,2-3H2,1H3	InChI=1S/C4H8O/c1-2-3-4-5/h4H,2-3H2,1H3	C4H8O	72.0575	106.034	104.851	104.686	Lite	0	0	0	0	0	0	0	0	0	0
DTXCID801516	Methyl ethyl ketone	78-93-3	CCC(C)=O	InChI=1S/C4H8O/c1-3-4(2)5/h3H2,1-2H3	InChI=1S/C4H8O/c1-3-4(2)5/h3H2,1-2H3	C4H8O	72.0575	105.778	105.33	104.659	Lite	0	0	0	0	0	0	0	0	0	0
DTXCID80210524	But-2-en-1-ol	6117-91-5	CC=CCO	InChI=1S/C4H8O/c1-2-3-4-5/h2-3,5H,4H2,1H3	InChI=1S/C4H8O/c1-2-3-4-5/h2-3,5H,4H2,1H3	C4H8O	72.0575	107.299	106.495	106.317	Lite	0	0	0	0	0	0	0	0	0	0
DTXCID707204	Methyl isothiocyanate	556-61-6	CN=C=S	InChI=1S/C2H3NS/c1-3-2-4/h1H3	InChI=1S/C2H3NS/c1-3-2-4/h1H3	C2H3NS	72.9986	100.205	99.668	99.1116	Lite	0	0	0	0	0	0	0	0	0	0
DTXCID20515	N,N-Dimethylformamide	68-12-2	CN(C)C=O	InChI=1S/C3H7NO/c1-4(2)3-5/h3H,1-2H3	InChI=1S/C3H7NO/c1-4(2)3-5/h3H,1-2H3	C3H7NO	73.0528	103.938	103.71	103.359	Lite	0	0	0	0	0	0	0	0	0	0
DTXCID8027167	N-Methylacetamide	79-16-3	CNC(C)=O	InChI=1S/C3H7NO/c1-3(5)4-2/h1-2H3,(H,4,5)	InChI=1S/C3H7NO/c1-3(5)4-2/h1-2H3,(H,4,5)	C3H7NO	73.0528	104.727	103.941	103.735	Lite	0	0	0	0	0	0	0	0	0	0
DTXCID404681	tert-Butylamine	75-64-9	CC(C)(C)N	InChI=1S/C4H11N/c1-4(2,3)5/h5H2,1-3H3	InChI=1S/C4H11N/c1-4(2,3)5/h5H2,1-3H3	C4H11N	73.0891	105.992	105.6	105.312	Lite	0	0	0	0	0	0	0	0	0	0
DTXCID501904	Butylamine	109-73-9	CCCCN	InChI=1S/C4H11N/c1-2-3-4-5/h2-5H2,1H3	InChI=1S/C4H11N/c1-2-3-4-5/h2-5H2,1H3	C4H11N	73.0891	106.922	106.541	106.213	Lite	0	0	0	0	0	0	0	0	0	0
DTXCID501909	Diethylamine hydrochloride	660-68-4	Cl.CCNCC	InChI=1S/C4H11N.ClH/c1-3-5-4-2;/h5H,3-4H2,1-2H3;1H	InChI=1S/C4H11N/c1-3-5-4-2/h5H,3-4H2,1-2H3	C4H11N	73.0891	108.556	107.87	107.705	Lite	0	0	0	0	0	0	0	0	0	0
DTXCID602284	2-Butanamine	13952-84-6	CCC(C)N	InChI=1/C4H11N/c1-3-4(2)5/h4H,3,5H2,1-2H3	InChI=1/C4H11N/c1-3-4(2)5/h4H,3,5H2,1-2H3	C4H11N	73.0891	106.634	105.849	105.714	Lite	0	0	0	0	0	0	0	0	0	0
NoDTXCID06, DTXCID505961, DTXCID505961	Calcium propionate, Propionic acid, Sodium propionate	4075-81-4, 79-09-4, 137-40-6	[Ca++].CCC([O-])=O.CCC([O-])=O	InChI=1S/2C3H6O2.Ca/c2*1-2-3(4)5;/h2*2H2,1H3,(H,4,5);/q;;+2/p-2	InChI=1S/C3H6O2/c1-2-3(4)5/h2H2,1H3,(H,4,5)	C3H6O2	74.0368			102.984	Lite	0	0	0	0	0	0	0	0	0	0
DTXCID107284	1,3-Dioxolane	646-06-0	C1COCO1	InChI=1S/C3H6O2/c1-2-5-3-4-1/h1-3H2	InChI=1S/C3H6O2/c1-2-5-3-4-1/h1-3H2	C3H6O2	74.0368	100.03	99.8626	99.4757	Lite	0	0	0	0	0	0	0	0	0	0
DTXCID4020117	Ethyl formate	109-94-4	CCOC=O	InChI=1S/C3H6O2/c1-2-5-3-4/h3H,2H2,1H3	InChI=1S/C3H6O2/c1-2-5-3-4/h3H,2H2,1H3	C3H6O2	74.0368	101.467	103.034	102.279	Lite	0	0	0	0	0	0	0	0	0	0
DTXCID60666	Glycidol	556-52-5	OCC1CO1	InChI=1/C3H6O2/c4-1-3-2-5-3/h3-4H,1-2H2	InChI=1/C3H6O2/c4-1-3-2-5-3/h3-4H,1-2H2	C3H6O2	74.0368	101.744	101.698	101.674	Lite	0	0	0	0	0	0	0	0	0	0
DTXCID301029	N-Nitrosodimethylamine	62-75-9	CN(C)N=O	InChI=1S/C2H6N2O/c1-4(2)3-5/h1-2H3	InChI=1S/C2H6N2O/c1-4(2)3-5/h1-2H3	C2H6N2O	74.048	105.046	103.156	102.827	Lite	0	0	0	0	0	0	0	0	0	0
DTXCID3020964	Aminoguanidine hydrochloride	1937-19-5	Cl.NNC(N)=N	InChI=1S/CH6N4.ClH/c2-1(3)5-4;/h4H2,(H4,2,3,5);1H	InChI=1S/CH6N4/c2-1(3)5-4/h1,4H,2-3H2	CH6N4	74.0592	103.248	102.901	102.273	Lite	0	0	0	0	0	0	0	0	0	0
DTXCID207518, DTXCID701740	Aluminum tributoxide, 1-Butanol	3085-30-1, 71-36-3	CCCCO[Al](OCCCC)OCCCC	InChI=1S/3C4H9O.Al/c3*1-2-3-4-5;/h3*2-4H2,1H3;/q3*-1;+3	InChI=1S/C4H10O/c1-2-3-4-5/h5H,2-4H2,1H3	C4H10O	74.0732	106.788	105.992	106.031	Lite	0	0	0	0	0	0	0	0	0	0
DTXCID40204	tert-Butyl alcohol	75-65-0	CC(C)(C)O	InChI=1S/C4H10O/c1-4(2,3)5/h5H,1-3H3_x000D_	InChI=1S/C4H10O/c1-4(2,3)5/h5H,1-3H3	C4H10O	74.0732	105.621	105.127	105.036	Lite	0	0	0	0	0	0	0	0	0	0
DTXCID601759	2-Methyl-1-propanol	78-83-1	CC(C)CO	InChI=1S/C4H10O/c1-4(2)3-5/h4-5H,3H2,1-2H3	InChI=1S/C4H10O/c1-4(2)3-5/h4-5H,3H2,1-2H3	C4H10O	74.0732	107.061	106.144	105.927	Lite	0	0	0	0	0	0	0	0	0	0
DTXCID701761	1,2-Diaminopropane	78-90-0	CC(N)CN	InChI=1/C3H10N2/c1-3(5)2-4/h3H,2,4-5H2,1H3	InChI=1/C3H10N2/c1-3(5)2-4/h3H,2,4-5H2,1H3	C3H10N2	74.0844	105.975	105.061	104.661	Lite	0	0	0	0	0	0	0	0	0	0
DTXCID901340	Thioacetamide	62-55-5	CC(N)=S	InChI=1S/C2H5NS/c1-2(3)4/h1H3,(H2,3,4)	InChI=1S/C2H5NS/c1-2(3)4/h1H3,(H2,3,4)	C2H5NS	75.0143	100.731	100.094	99.4465	Lite	0	1	0	0	0	0	0	0	0	0
DTXCID60834	Methyl carbamate	598-55-0	COC(N)=O	InChI=1S/C2H5NO2/c1-5-2(3)4/h1H3,(H2,3,4)	InChI=1S/C2H5NO2/c1-5-2(3)4/h1H3,(H2,3,4)	C2H5NO2	75.032	102.586	102.208	102.022	Lite	0	0	0	0	0	0	0	0	0	0
DTXCID80969	Nitroethane	79-24-3	CC[N+]([O-])=O	InChI=1S/C2H5NO2/c1-2-3(4)5/h2H2,1H3	InChI=1S/C2H5NO2/c1-2-3(4)5/h2H2,1H3	C2H5NO2	75.032	103.616	102.906	102.566	Lite	0	0	0	0	0	0	0	0	0	0
DTXCID901764	1-Amino-2-propanol	78-96-6	CC(O)CN	InChI=1/C3H9NO/c1-3(5)2-4/h3,5H,2,4H2,1H3	InChI=1/C3H9NO/c1-3(5)2-4/h3,5H,2,4H2,1H3	C3H9NO	75.0684	105.162	104.645	104.607	Lite	0	0	0	0	0	0	0	0	0	0
DTXCID905603	N-Methylethanolamine	109-83-1	CNCCO	InChI=1S/C3H9NO/c1-4-2-3-5/h4-5H,2-3H2,1H3	InChI=1S/C3H9NO/c1-4-2-3-5/h4-5H,2-3H2,1H3	C3H9NO	75.0684	106.092	104.929	104.872	Lite	0	0	0	0	0	0	0	0	0	0
DTXCID4045	Allyl chloride	107-05-1	ClCC=C	InChI=1S/C3H5Cl/c1-2-3-4/h2H,1,3H2	InChI=1S/C3H5Cl/c1-2-3-4/h2H,1,3H2	C3H5Cl	76.008			92.6421	Lite	0	0	0	0	0	0	0	0	0	0
DTXCID101348	Thiourea	62-56-6	NC(N)=S	InChI=1S/CH4N2S/c2-1(3)4/h(H4,2,3,4)	InChI=1S/CH4N2S/c2-1(3)4/h(H4,2,3,4)	CH4N2S	76.0095	99.2634	98.8197	97.6025	Lite	0	0	0	0	0	0	0	0	0	0
DTXCID105363, DTXCID105363	Glycolic acid sodium salt, Glycolic acid	2836-32-0, 79-14-1	[Na+].OCC([O-])=O	InChI=1S/C2H4O3.Na/c3-1-2(4)5;/h3H,1H2,(H,4,5);/q;+1/p-1_x000D_	InChI=1S/C2H4O3/c3-1-2(4)5/h3H,1H2,(H,4,5)	C2H4O3	76.016	105.031	101.973	101.641	Lite	0	0	0	0	0	0	0	0	0	0
DTXCID405438	Hydroxyurea	127-07-1	NC(=O)NO	InChI=1S/CH4N2O2/c2-1(4)3-5/h5H,(H3,2,3,4)	InChI=1S/CH4N2O2/c2-1(4)3-5/h5H,(H3,2,3,4)	CH4N2O2	76.0273	102.058	101.289	101.863	Lite	0	0	0	0	0	0	0	0	0	0
DTXCID6021246	1,3-Propanediol	504-63-2	OCCCO	InChI=1S/C3H8O2/c4-2-1-3-5/h4-5H,1-3H2	InChI=1S/C3H8O2/c4-2-1-3-5/h4-5H,1-3H2	C3H8O2	76.0524	106.98	105.663	105.366	Lite	0	0	0	0	0	0	0	0	0	0
DTXCID804182	2-Methoxyethanol	109-86-4	COCCO	InChI=1S/C3H8O2/c1-5-3-2-4/h4H,2-3H2,1H3	InChI=1S/C3H8O2/c1-5-3-2-4/h4H,2-3H2,1H3	C3H8O2	76.0524	104.703	104.201	104.138	Lite	0	0	0	0	0	0	0	0	0	0
DTXCID901206	1,2-Propylene glycol	57-55-6	CC(O)CO	InChI=1/C3H8O2/c1-3(5)2-4/h3-5H,2H2,1H3	InChI=1/C3H8O2/c1-3(5)2-4/h3-5H,2H2,1H3	C3H8O2	76.0524	104.287	104.109	104.04	Lite	0	0	0	0	0	0	0	0	0	1
DTXCID50728	2-Hydroxyethylhydrazine	109-84-2	NNCCO	InChI=1S/C2H8N2O/c3-4-1-2-5/h4-5H,1-3H2	InChI=1S/C2H8N2O/c3-4-1-2-5/h4-5H,1-3H2	C2H8N2O	76.0637	104.349	104.425	104.08	Lite	0	0	0	0	0	0	0	0	0	0
DTXCID0014255	2-Fluoroacetamide	640-19-7	NC(=O)CF	InChI=1S/C2H4FNO/c3-1-2(4)5/h1H2,(H2,4,5)	InChI=1S/C2H4FNO/c3-1-2(4)5/h1H2,(H2,4,5)	C2H4FNO	77.0277	98.0482	97.5176	97.3149	Lite	0	0	0	0	0	0	0	0	0	0
DTXCID0020733, DTXCID1022130, DTXCID1022500, DTXCID2022129, DTXCID4022498, DTXCID4027498, DTXCID501409, DTXCID801150, DTXCID8024525, DTXCID8030841, DTXCID9022499	Triphenyltin chloride, Diphenylmercury(II), Triphenyltin fluoride, Phenylmercuric chloride, Triphenylbismuth, Triphenyllead acetate, Triphenyltin hydroxide, Phenylmercuric acetate, Phenylmercuric lactate, Triphenylstibine, Triphenylbismuthine dichloride	639-58-7, 587-85-9, 379-52-2, 100-56-1, 603-33-8, 1162-06-7, 76-87-9, 62-38-4, 122-64-5, 603-36-1, 594-30-9	Cl[Sn](C1=CC=CC=C1)(C1=CC=CC=C1)C1=CC=CC=C1	InChI=1S/3C6H5.ClH.Sn/c3*1-2-4-6-5-3-1;;/h3*1-5H;1H;/q;;;;+1/p-1	InChI=1S/C6H5/c1-2-4-6-5-3-1/h1-5H	C6H5	77.0391			102.827	Lite	0	0	0	0	0	0	0	0	0	0
NoDTXCID07	Potassium silicate	1312-76-1	[K+].O[Si]([O-])=O	InChI=1S/K.HO3Si/c;1-4(2)3/h;1H/q+1;-1_x000D_	InChI=1S/H2O3Si/c1-4(2)3/h1-2H	H2O3Si	77.9773				NA	0	0	0	0	0	0	0	0	0	0
DTXCID60292	Chloroacetaldehyde	107-20-0	ClCC=O	InChI=1S/C2H3ClO/c3-1-2-4/h2H,1H2	InChI=1S/C2H3ClO/c3-1-2-4/h2H,1H2	C2H3ClO	77.9872	92.6024	92.1368	91.5973	Lite	0	0	0	0	0	0	0	0	0	0
DTXCID8021981, DTXCID8021981	Fluoroacetic acid, Sodium fluoroacetate	144-49-0, 62-74-8	OC(=O)CF	InChI=1S/C2H3FO2/c3-1-2(4)5/h1H2,(H,4,5)	InChI=1S/C2H3FO2/c3-1-2(4)5/h1H2,(H,4,5)	C2H3FO2	78.0117			96.6852	Lite	0	0	0	0	0	0	0	0	0	0
DTXCID401735	Dimethyl sulfoxide	67-68-5	CS(C)=O	InChI=1S/C2H6OS/c1-4(2)3/h1-2H3	InChI=1S/C2H6OS/c1-4(2)3/h1-2H3	C2H6OS	78.0139	101.596	101.719	101.318	Lite	0	0	0	0	0	0	0	0	0	0
DTXCID606343	2-Mercaptoethanol	60-24-2	OCCS	InChI=1S/C2H6OS/c3-1-2-4/h3-4H,1-2H2_x000D_	InChI=1S/C2H6OS/c3-1-2-4/h3-4H,1-2H2	C2H6OS	78.0139	101.681	100.988	100.259	Lite	0	0	0	0	0	0	0	0	0	0
DTXCID40307	Chloromethyl methyl ether	107-30-2	COCCl	InChI=1S/C2H5ClO/c1-4-2-3/h2H2,1H3	InChI=1S/C2H5ClO/c1-4-2-3/h2H2,1H3	C2H5ClO	80.0029	94.2157	93.6235	93.0976	Lite	0	0	0	0	0	0	0	0	0	0
DTXCID601877	2-Chloroethanol	107-07-3	OCCCl	InChI=1S/C2H5ClO/c3-1-2-4/h4H,1-2H2	InChI=1S/C2H5ClO/c3-1-2-4/h4H,1-2H2	C2H5ClO	80.0029	94.1164	93.6135	93.4883	Lite	0	0	0	0	0	0	0	0	0	0
DTXCID4029850	Pyrimidine	289-95-2	C1=CN=CN=C1	InChI=1S/C4H4N2/c1-2-5-4-6-3-1/h1-4H_x000D_	InChI=1S/C4H4N2/c1-2-5-4-6-3-1/h1-4H	C4H4N2	80.0374	103.193	102.587	102.02	Lite	0	0	0	0	0	0	0	0	0	0
DTXCID3028009	(Methylcyclopentadienyl)tricarbonylmanganese	12108-13-3	[Mn+].[C-]#[O+].[C-]#[O+].[C-]#[O+].CC1C=C[C-]=C1	InChI=1/C6H7.3CO.Mn/c1-6-4-2-3-5-6;3*1-2;/h2,4-6H,1H3;;;;/q-1;;;;+1	InChI=1/C6H8/c1-6-4-2-3-5-6/h2,5-6H,4H2,1H3	C6H8	80.0626			106.797	Lite	0	0	0	0	0	0	0	0	0	0
DTXCID4031221	1-Methylpyrrole	96-54-8	CN1C=CC=C1	InChI=1S/C5H7N/c1-6-4-2-3-5-6/h2-5H,1H3	InChI=1S/C5H7N/c1-6-4-2-3-5-6/h2-5H,1H3	C5H7N	81.0578			105.435	Lite	0	0	0	0	0	0	0	0	0	0
DTXCID70209447	(2Z)-2-Pentenenitrile	25899-50-7	CC\C=C/C#N	InChI=1S/C5H7N/c1-2-3-4-5-6/h3-4H,2H2,1H3/b4-3-	InChI=1S/C5H7N/c1-2-3-4-5-6/h3-4H,2H2,1H3/b4-3-	C5H7N	81.0578			110.035	Lite	0	0	0	0	0	0	0	0	0	0
DTXCID805578	2-Methyl-3-butenenitrile	16529-56-9	CC(C=C)C#N	InChI=1/C5H7N/c1-3-5(2)4-6/h3,5H,1H2,2H3	InChI=1/C5H7N/c1-3-5(2)4-6/h3,5H,1H2,2H3	C5H7N	81.0578			111.293	Lite	0	0	0	0	0	0	0	0	0	0
NoDTXCID08	Mono- and di- potassium salts of phosphorous acid	13492-26-7	[K+].[K+].OP([O-])[O-]	InChI=1S/2K.HO3P/c;;1-4(2)3/h;;1H/q2*+1;-2_x000D_	InChI=1S/H3O3P/c1-4(2)3/h1-3H	H3O3P	81.982				NA	0	0	0	0	0	0	0	0	0	0
DTXCID202107	2-Methylimidazole	693-98-1	CC1=NC=CN1	InChI=1S/C4H6N2/c1-4-5-2-3-6-4/h2-3H,1H3,(H,5,6)	InChI=1S/C4H6N2/c1-4-5-2-3-6-4/h2-3H,1H3,(H,5,6)	C4H6N2	82.0531	106.032	105.636	105.125	Lite	0	0	0	0	0	0	0	0	0	0
DTXCID6030863	1-Methylimidazole	616-47-7	CN1C=CN=C1	InChI=1S/C4H6N2/c1-6-3-2-5-4-6/h2-4H,1H3	InChI=1S/C4H6N2/c1-6-3-2-5-4-6/h2-4H,1H3	C4H6N2	82.0531	106.001	105.472	104.951	Lite	0	0	0	0	0	0	0	0	0	0
DTXCID901620	Isovaleronitrile	625-28-5	CC(C)CC#N	InChI=1S/C5H9N/c1-5(2)3-4-6/h5H,3H2,1-2H3	InChI=1S/C5H9N/c1-5(2)3-4-6/h5H,3H2,1-2H3	C5H9N	83.0735			111.814	Lite	0	0	0	0	0	0	0	0	0	0
NoDTXCID09	Potassium chlorate	3811-04-09	[K+].[O-][Cl](=O)=O	InChI=1S/ClHO3.K/c2-1(3)4;/h(H,2,3,4);/q;+1/p-1	InChI=1S/ClHO3/c2-1(3)4/h(H,2,3,4)	ClHO3	83.9614				NA	0	0	0	0	0	0	0	0	0	0
DTXCID50354	Cyanoguanidine	461-58-5	NC(=N)NC#N	InChI=1S/C2H4N4/c3-1-6-2(4)5/h(H4,4,5,6)	InChI=1S/C2H4N4/c3-1-6-2(4)5/h(H4,4,5,6)	C2H4N4	84.0436	109.462	108.589	108.233	Lite	0	0	0	0	0	0	0	0	0	0
DTXCID7013058	4-Amino-1,2,4-triazole	584-13-4	NN1C=NN=C1	InChI=1S/C2H4N4/c3-6-1-4-5-2-6/h1-2H,3H2	InChI=1S/C2H4N4/c3-6-1-4-5-2-6/h1-2H,3H2	C2H4N4	84.0436	104.135	104.026	103.342	Lite	0	0	0	0	0	0	0	0	0	0
DTXCID9076	Amitrole	61-82-5	NC1=NNC=N1	InChI=1S/C2H4N4/c3-2-4-1-5-6-2/h1H,(H3,3,4,5,6)	InChI=1S/C2H4N4/c3-2-4-1-5-6-2/h1H,(H3,3,4,5,6)	C2H4N4	84.0436	102.769	103.853	103.167	Lite	0	0	0	0	0	0	0	0	0	0
DTXCID0031130	3-Methylbut-3-en-2-one	814-78-8	CC(=C)C(C)=O	InChI=1S/C5H8O/c1-4(2)5(3)6/h1H2,2-3H3_x000D_	InChI=1S/C5H8O/c1-4(2)5(3)6/h1H2,2-3H3	C5H8O	84.0575	110.825	110.398	109.842	Lite	0	0	0	0	0	0	0	0	0	0
DTXCID209154	Cyclopentanone	120-92-3	O=C1CCCC1	InChI=1S/C5H8O/c6-5-3-1-2-4-5/h1-4H2	InChI=1S/C5H8O/c6-5-3-1-2-4-5/h1-4H2	C5H8O	84.0575	107.599	107.545	106.984	Lite	0	0	0	0	0	0	0	0	0	0
DTXCID4021426	3,4-Dihydro-2H-pyran	110-87-2	C1COC=CC1	InChI=1S/C5H8O/c1-2-4-6-5-3-1/h2,4H,1,3,5H2	InChI=1S/C5H8O/c1-2-4-6-5-3-1/h2,4H,1,3,5H2	C5H8O	84.0575	106.219	106.029	105.572	Lite	0	0	0	0	0	0	0	0	0	0
DTXCID701923	Cyclohexane	110-82-7	C1CCCCC1	InChI=1S/C6H12/c1-2-4-6-5-3-1/h1-6H2	InChI=1S/C6H12/c1-2-4-6-5-3-1/h1-6H2	C6H12	84.0939				NA	0	0	0	0	0	0	0	0	0	0
DTXCID807211	3,3-Dimethyl-1-butene	558-37-2	CC(C)(C)C=C	InChI=1S/C6H12/c1-5-6(2,3)4/h5H,1H2,2-4H3	InChI=1S/C6H12/c1-5-6(2,3)4/h5H,1H2,2-4H3	C6H12	84.0939				NA	0	0	0	0	0	0	0	0	0	0
DTXCID707149	Cyanoacetic acid	372-09-8	OC(=O)CC#N	InChI=1S/C3H3NO2/c4-2-1-3(5)6/h1H2,(H,5,6)	InChI=1S/C3H3NO2/c4-2-1-3(5)6/h1H2,(H,5,6)	C3H3NO2	85.0164			108.238	Lite	0	0	0	1	0	0	0	0	0	0
DTXCID9030670	Tetrazol-5-ylamine	4418-61-5	NC1=NN=NN1	InChI=1S/CH3N5/c2-1-3-5-6-4-1/h(H3,2,3,4,5,6)_x000D_	InChI=1S/CH3N5/c2-1-3-5-6-4-1/h(H3,2,3,4,5,6)	CH3N5	85.0388	102.419	103.2	102.678	Lite	0	0	0	0	0	0	0	0	0	0
DTXCID109600	Methacrylamide	79-39-0	CC(=C)C(N)=O	InChI=1S/C4H7NO/c1-3(2)4(5)6/h1H2,2H3,(H2,5,6)	InChI=1S/C4H7NO/c1-3(2)4(5)6/h1H2,2H3,(H2,5,6)	C4H7NO	85.0528	109.667	108.841	108.769	Lite	0	0	0	0	0	0	0	0	0	0
DTXCID705427	2-Hydroxy-2-methylpropanenitrile	75-86-5	CC(C)(O)C#N	InChI=1S/C4H7NO/c1-4(2,6)3-5/h6H,1-2H3	InChI=1S/C4H7NO/c1-4(2,6)3-5/h6H,1-2H3	C4H7NO	85.0528	111.554	110.803	110.589	Lite	0	0	0	0	0	0	0	0	0	0
DTXCID707246	2-Pyrrolidinone	616-45-5	O=C1CCCN1	InChI=1S/C4H7NO/c6-4-2-1-3-5-4/h1-3H2,(H,5,6)	InChI=1S/C4H7NO/c6-4-2-1-3-5-4/h1-3H2,(H,5,6)	C4H7NO	85.0528	106.757	106.7	106.491	Lite	0	0	0	0	0	0	0	0	0	0
DTXCID6022210	N-Methylpyrrolidine	120-94-5	CN1CCCC1	InChI=1S/C5H11N/c1-6-4-2-3-5-6/h2-5H2,1H3	InChI=1S/C5H11N/c1-6-4-2-3-5-6/h2-5H2,1H3	C5H11N	85.0891	109.117	108.257	107.841	Lite	0	0	0	0	0	0	0	0	0	0
DTXCID204183	Methyl acrylate	96-33-3	COC(=O)C=C	InChI=1S/C4H6O2/c1-3-4(5)6-2/h3H,1H2,2H3	InChI=1S/C4H6O2/c1-3-4(5)6-2/h3H,1H2,2H3	C4H6O2	86.0368	109.999	109.734	109.042	Lite	0	0	0	0	0	0	0	0	0	0
DTXCID50223	beta-Butyrolactone	3068-88-0	CC1CC(=O)O1	InChI=1/C4H6O2/c1-3-2-4(5)6-3/h3H,2H2,1H3	InChI=1/C4H6O2/c1-3-2-4(5)6-3/h3H,2H2,1H3	C4H6O2	86.0368	108.142	107.795	107.392	Lite	0	0	0	0	0	0	0	0	0	0
DTXCID505542, DTXCID7015204	Sodium methacrylate, Tributyltin methacrylate	5536-61-8, 2155-70-6	[Na+].CC(=C)C([O-])=O	InChI=1S/C4H6O2.Na/c1-3(2)4(5)6;/h1H2,2H3,(H,5,6);/q;+1/p-1	InChI=1S/C4H6O2/c1-3(2)4(5)6/h1H2,2H3,(H,5,6)	C4H6O2	86.0368			108.385	Lite	0	0	0	0	0	0	0	0	0	0
DTXCID701583	2,3-Butanedione	431-03-8	CC(=O)C(C)=O	InChI=1S/C4H6O2/c1-3(5)4(2)6/h1-2H3	InChI=1S/C4H6O2/c1-3(5)4(2)6/h1-2H3	C4H6O2	86.0368	110.102	109.817	109.484	Lite	0	0	0	0	0	0	0	0	0	0
DTXCID80209433	2-Butenoic acid	3724-65-0	CC=CC(O)=O	InChI=1S/C4H6O2/c1-2-3-4(5)6/h2-3H,1H3,(H,5,6)	InChI=1S/C4H6O2/c1-2-3-4(5)6/h2-3H,1H3,(H,5,6)	C4H6O2	86.0368			110.234	Lite	0	0	0	0	0	0	0	0	0	0
DTXCID80224	4-Butyrolactone	96-48-0	O=C1CCCO1	InChI=1S/C4H6O2/c5-4-2-1-3-6-4/h1-3H2	InChI=1S/C4H6O2/c5-4-2-1-3-6-4/h1-3H2	C4H6O2	86.0368	106.643	106.081	105.781	Lite	0	0	0	0	0	0	0	0	0	0
DTXCID901921	2-Butyne-1,4-diol	110-65-6	OCC#CCO	InChI=1S/C4H6O2/c5-3-1-2-4-6/h5-6H,3-4H2	InChI=1S/C4H6O2/c5-3-1-2-4-6/h5-6H,3-4H2	C4H6O2	86.0368	117.3	113.852	113.742	Lite	0	0	0	0	0	0	0	0	0	0
DTXCID001653	Pentanal	110-62-3	CCCCC=O	InChI=1S/C5H10O/c1-2-3-4-5-6/h5H,2-4H2,1H3	InChI=1S/C5H10O/c1-2-3-4-5-6/h5H,2-4H2,1H3	C5H10O	86.0732	113.401	112.355	112.119	Lite	0	0	0	0	0	0	0	0	0	0
DTXCID1027471	2-Methyl-3-buten-2-ol	115-18-4	CC(C)(O)C=C	InChI=1S/C5H10O/c1-4-5(2,3)6/h4,6H,1H2,2-3H3	InChI=1S/C5H10O/c1-4-5(2,3)6/h4,6H,1H2,2-3H3	C5H10O	86.0732	111.843	111.289	111	Lite	0	0	0	0	0	0	0	0	0	0
DTXCID201619	3-Methylbutanal	590-86-3	CC(C)CC=O	InChI=1S/C5H10O/c1-5(2)3-4-6/h4-5H,3H2,1-2H3	InChI=1S/C5H10O/c1-5(2)3-4-6/h4-5H,3H2,1-2H3	C5H10O	86.0732	112.786	112.315	112.347	Lite	0	0	0	0	0	0	0	0	0	0
DTXCID201818	2-Methylbutanal	96-17-3	CCC(C)C=O	InChI=1/C5H10O/c1-3-5(2)4-6/h4-5H,3H2,1-2H3	InChI=1/C5H10O/c1-3-5(2)4-6/h4-5H,3H2,1-2H3	C5H10O	86.0732	113.131	112.917	112.76	Lite	0	0	0	0	0	0	0	0	0	0
DTXCID301888	2-Pentanone	107-87-9	CCCC(C)=O	InChI=1S/C5H10O/c1-3-4-5(2)6/h3-4H2,1-2H3	InChI=1S/C5H10O/c1-3-4-5(2)6/h3-4H2,1-2H3	C5H10O	86.0732	111.854	112.016	111.455	Lite	0	0	0	0	0	0	0	0	0	0
DTXCID507206	3-Methyl-2-buten-1-ol	556-82-1	CC(C)=CCO	InChI=1S/C5H10O/c1-5(2)3-4-6/h3,6H,4H2,1-2H3	InChI=1S/C5H10O/c1-5(2)3-4-6/h3,6H,4H2,1-2H3	C5H10O	86.0732	113.858	112.838	112.833	Lite	0	0	0	0	0	0	0	0	0	0
DTXCID802062	3-Methyl-2-butanone	563-80-4	CC(C)C(C)=O	InChI=1S/C5H10O/c1-4(2)5(3)6/h4H,1-3H3	InChI=1S/C5H10O/c1-4(2)5(3)6/h4H,1-3H3	C5H10O	86.0732	112.39	112.06	111.565	Lite	0	0	0	0	0	0	0	0	0	0
DTXCID8031079	3-Methylbut-3-en-1-ol	763-32-6	CC(=C)CCO	InChI=1S/C5H10O/c1-5(2)3-4-6/h6H,1,3-4H2,2H3	InChI=1S/C5H10O/c1-5(2)3-4-6/h6H,1,3-4H2,2H3	C5H10O	86.0732	111.96	111.644	111.639	Lite	0	0	0	0	0	0	0	0	0	0
DTXCID9013371	Cyclopentanol	96-41-3	OC1CCCC1	InChI=1S/C5H10O/c6-5-3-1-2-4-5/h5-6H,1-4H2	InChI=1S/C5H10O/c6-5-3-1-2-4-5/h5-6H,1-4H2	C5H10O	86.0732	109.604	108.589	108.516	Lite	0	0	0	0	0	0	0	0	0	0
DTXCID701164, DTXCID701164	Piperazine dihydrochloride, Piperazine	142-64-3, 110-85-0	Cl.Cl.C1CNCCN1	InChI=1S/C4H10N2.2ClH/c1-2-6-4-3-5-1;;/h5-6H,1-4H2;2*1H	InChI=1S/C4H10N2/c1-2-6-4-3-5-1/h5-6H,1-4H2	C4H10N2	86.0844	107.707	107.285	106.933	Lite	0	0	0	0	0	0	0	0	0	0
DTXCID9031220	3-Methylpentane	96-14-0	CCC(C)CC	InChI=1S/C6H14/c1-4-6(3)5-2/h6H,4-5H2,1-3H3_x000D_	InChI=1S/C6H14/c1-4-6(3)5-2/h6H,4-5H2,1-3H3	C6H14	86.1096				NA	0	0	0	0	0	0	0	0	0	0
DTXCID0031186	2-Chloroacrylonitrile	920-37-6	ClC(=C)C#N	InChI=1S/C3H2ClN/c1-3(4)2-5/h1H2_x000D_	InChI=1S/C3H2ClN/c1-3(4)2-5/h1H2	C3H2ClN	86.9876			98.5297	Lite	0	0	0	0	0	0	0	0	0	0
DTXCID0011374	Glycidamide	5694-00-8	NC(=O)C1CO1	InChI=1/C3H5NO2/c4-3(5)2-1-6-2/h2H,1H2,(H2,4,5)	InChI=1/C3H5NO2/c4-3(5)2-1-6-2/h2H,1H2,(H2,4,5)	C3H5NO2	87.032	107.68	107.148	107.13	Lite	0	0	0	0	0	0	0	0	0	0
DTXCID10209123	2-Butanone oxime	96-29-7	CCC(C)=NO	InChI=1S/C4H9NO/c1-3-4(2)5-6/h6H,3H2,1-2H3	InChI=1S/C4H9NO/c1-3-4(2)5-6/h6H,3H2,1-2H3	C4H9NO	87.0684	112.403	111.854	111.557	Lite	0	0	0	0	0	0	0	0	0	0
DTXCID305688, DTXCID305688	Borane - morpholine complex, Morpholine	4856-95-5, 110-91-8	B.C1COCCN1	InChI=1S/C4H9NO.BH3/c1-3-6-4-2-5-1;/h5H,1-4H2;1H3	InChI=1S/C4H9NO/c1-3-6-4-2-5-1/h5H,1-4H2	C4H9NO	87.0684	107.147	106.856	106.4	Lite	0	0	0	0	0	0	0	0	0	0
DTXCID50209369	Butanal oxime	110-69-0	CCCC=NO	InChI=1S/C4H9NO/c1-2-3-4-5-6/h4,6H,2-3H2,1H3	InChI=1S/C4H9NO/c1-2-3-4-5-6/h4,6H,2-3H2,1H3	C4H9NO	87.0684	112.691	111.987	111.593	Lite	0	0	0	0	0	0	0	0	0	0
DTXCID90499	N,N-Dimethylacetamide	127-19-5	CN(C)C(C)=O	InChI=1S/C4H9NO/c1-4(6)5(2)3/h1-3H3	InChI=1S/C4H9NO/c1-4(6)5(2)3/h1-3H3	C4H9NO	87.0684	111.068	110.635	110.407	Lite	0	0	0	0	0	0	0	0	0	0
DTXCID801650, DTXCID801650	Sodium pyruvate, 2-Oxopropanoic acid	113-24-6, 127-17-3	[Na+].CC(=O)C([O-])=O	InChI=1S/C3H4O3.Na/c1-2(4)3(5)6;/h1H3,(H,5,6);/q;+1/p-1	InChI=1S/C3H4O3/c1-2(4)3(5)6/h1H3,(H,5,6)	C3H4O3	88.016	108.613	107.77	107.815	Lite	0	0	0	0	0	0	0	0	0	0
DTXCID30209807	Glyoxime	557-30-2	ON=CC=NO	InChI=1S/C2H4N2O2/c5-3-1-2-4-6/h1-2,5-6H	InChI=1S/C2H4N2O2/c5-3-1-2-4-6/h1-2,5-6H	C2H4N2O2	88.0273	107.732	106.34	108.403	Lite	0	0	0	0	0	0	0	0	0	0
DTXCID8027743	Tetrahydrothiophene	110-01-0	C1CCSC1	InChI=1S/C4H8S/c1-2-4-5-3-1/h1-4H2	InChI=1S/C4H8S/c1-2-4-5-3-1/h1-4H2	C4H8S	88.0347				NA	0	0	0	0	0	0	0	0	0	0
DTXCID304399	Acetoin	513-86-0	CC(O)C(C)=O	InChI=1/C4H8O2/c1-3(5)4(2)6/h3,5H,1-2H3	InChI=1/C4H8O2/c1-3(5)4(2)6/h3,5H,1-2H3	C4H8O2	88.0524	111.086	110.29	110.192	Lite	0	0	0	0	0	0	0	0	0	0
DTXCID401515	Butanoic acid	107-92-6	CCCC(O)=O	InChI=1S/C4H8O2/c1-2-3-4(5)6/h2-3H2,1H3,(H,5,6)	InChI=1S/C4H8O2/c1-2-3-4(5)6/h2-3H2,1H3,(H,5,6)	C4H8O2	88.0524			110.01	Lite	0	0	0	0	0	0	0	0	0	0
DTXCID602001	Ethyl acetate	141-78-6	CCOC(C)=O	InChI=1S/C4H8O2/c1-3-6-4(2)5/h3H2,1-2H3	InChI=1S/C4H8O2/c1-3-6-4(2)5/h3H2,1-2H3	C4H8O2	88.0524	111.033	110.584	110.279	Lite	0	0	0	0	0	0	0	0	0	0
DTXCID807258	Isopropyl formate	625-55-8	CC(C)OC=O	InChI=1S/C4H8O2/c1-4(2)6-3-5/h3-4H,1-2H3	InChI=1S/C4H8O2/c1-4(2)6-3-5/h3-4H,1-2H3	C4H8O2	88.0524	109.619	109.502	108.785	Lite	0	0	0	0	0	0	0	0	0	0
DTXCID107069	2-Methyl-1-butanol	137-32-6	CCC(C)CO	InChI=1/C5H12O/c1-3-5(2)4-6/h5-6H,3-4H2,1-2H3	InChI=1/C5H12O/c1-3-5(2)4-6/h5-6H,3-4H2,1-2H3	C5H12O	88.0888	113.167	112.624	112.978	Lite	0	0	0	0	0	0	0	0	0	0
DTXCID705469	Isopentyl alcohol	123-51-3	CC(C)CCO	InChI=1S/C5H12O/c1-5(2)3-4-6/h5-6H,3-4H2,1-2H3	InChI=1S/C5H12O/c1-5(2)3-4-6/h5-6H,3-4H2,1-2H3	C5H12O	88.0888	114.403	113.813	113.498	Lite	0	0	0	0	0	0	0	0	0	0
DTXCID8021436	2-Methyl-2-butanol	75-85-4	CCC(C)(C)O	InChI=1S/C5H12O/c1-4-5(2,3)6/h6H,4H2,1-3H3	InChI=1S/C5H12O/c1-4-5(2,3)6/h6H,4H2,1-3H3	C5H12O	88.0888	112.526	112.217	111.982	Lite	0	0	0	0	0	0	0	0	0	0
DTXCID2010336	3-Chloropropionitrile	542-76-7	ClCCC#N	InChI=1S/C3H4ClN/c4-2-1-3-5/h1-2H2	InChI=1S/C3H4ClN/c4-2-1-3-5/h1-2H2	C3H4ClN	89.0032			99.495	Lite	0	0	0	0	0	0	0	0	0	0
DTXCID301427	Urethane	51-79-6	CCOC(N)=O	InChI=1S/C3H7NO2/c1-2-6-3(4)5/h2H2,1H3,(H2,4,5)	InChI=1S/C3H7NO2/c1-2-6-3(4)5/h2H2,1H3,(H2,4,5)	C3H7NO2	89.0477	108.771	109.409	109.307	Lite	0	0	0	0	0	0	0	0	0	0
DTXCID50980	1-Nitropropane	108-03-2	CCC[N+]([O-])=O	InChI=1S/C3H7NO2/c1-2-3-4(5)6/h2-3H2,1H3	InChI=1S/C3H7NO2/c1-2-3-4(5)6/h2-3H2,1H3	C3H7NO2	89.0477	110.277	110.388	110.171	Lite	0	0	0	0	0	0	0	0	0	0
DTXCID80981	2-Nitropropane	79-46-9	CC(C)[N+]([O-])=O	InChI=1S/C3H7NO2/c1-3(2)4(5)6/h3H,1-2H3	InChI=1S/C3H7NO2/c1-3(2)4(5)6/h3H,1-2H3	C3H7NO2	89.0477	110.39	109.863	109.601	Lite	0	0	0	0	0	0	0	0	0	0
DTXCID00505	Dimethylaminoethanol	108-01-0	CN(C)CCO	InChI=1S/C4H11NO/c1-5(2)3-4-6/h6H,3-4H2,1-2H3	InChI=1S/C4H11NO/c1-5(2)3-4-6/h6H,3-4H2,1-2H3	C4H11NO	89.0841	111.715	111.063	111.119	Lite	0	0	0	0	0	0	0	0	0	0
DTXCID301922	2-(Ethylamino)ethanol	110-73-6	CCNCCO	InChI=1S/C4H11NO/c1-2-5-3-4-6/h5-6H,2-4H2,1H3	InChI=1S/C4H11NO/c1-2-5-3-4-6/h5-6H,2-4H2,1H3	C4H11NO	89.0841	114.301	113.368	113.335	Lite	0	0	0	0	0	0	0	0	0	0
DTXCID407032	2-Amino-2-methylpropan-1-ol	124-68-5	CC(C)(N)CO	InChI=1S/C4H11NO/c1-4(2,5)3-6/h6H,3,5H2,1-2H3	InChI=1S/C4H11NO/c1-4(2,5)3-6/h6H,3,5H2,1-2H3	C4H11NO	89.0841	111.337	111.064	111.014	Lite	0	0	0	0	0	0	0	0	0	0
DTXCID609359	1-Methoxy-2-propylamine	37143-54-7	COCC(C)N	InChI=1/C4H11NO/c1-4(5)3-6-2/h4H,3,5H2,1-2H3	InChI=1/C4H11NO/c1-4(5)3-6-2/h4H,3,5H2,1-2H3	C4H11NO	89.0841	112.444	111.533	111.467	Lite	0	0	0	0	0	0	0	0	0	0
DTXCID807596	3-Methoxypropylamine	5332-73-0	COCCCN	InChI=1S/C4H11NO/c1-6-4-2-3-5/h2-5H2,1H3	InChI=1S/C4H11NO/c1-6-4-2-3-5/h2-5H2,1H3	C4H11NO	89.0841	112.318	111.867	111.641	Lite	0	0	0	0	0	0	0	0	0	0
DTXCID805816	Oxalic acid	144-62-7	OC(=O)C(O)=O	InChI=1S/C2H2O4/c3-1(4)2(5)6/h(H,3,4)(H,5,6)	InChI=1S/C2H2O4/c3-1(4)2(5)6/h(H,3,4)(H,5,6)	C2H2O4	89.9953			105.93	Lite	0	0	0	0	0	0	0	0	0	0
DTXCID30279	3-Chloro-2-methylpropene	563-47-3	CC(=C)CCl	InChI=1S/C4H7Cl/c1-4(2)3-5/h1,3H2,2H3	InChI=1S/C4H7Cl/c1-4(2)3-5/h1,3H2,2H3	C4H7Cl	90.0236			100.806	Lite	0	0	0	0	0	0	0	0	0	0
DTXCID40210520	1-Chlorobut-2-ene	591-97-9	CC=CCCl	InChI=1S/C4H7Cl/c1-2-3-4-5/h2-3H,4H2,1H3_x000D_	InChI=1S/C4H7Cl/c1-2-3-4-5/h2-3H,4H2,1H3	C4H7Cl	90.0236			101.781	Lite	0	0	0	0	0	0	0	0	0	0
DTXCID90520	2,2-Dimethylvinyl chloride	513-37-1	CC(C)=CCl	InChI=1S/C4H7Cl/c1-4(2)3-5/h3H,1-2H3	InChI=1S/C4H7Cl/c1-4(2)3-5/h3H,1-2H3	C4H7Cl	90.0236			100.967	Lite	0	0	0	0	0	0	0	0	0	0
NoDTXCID10, NoDTXCID10, DTXCID003192	Lactic acid, calcium salt, hydrate (2:1:5), Calcium lactate, Lactic acid	5743-47-5, 814-80-2, 50-21-5	O.O.O.O.O.[Ca++].CC(O)C([O-])=O.CC(O)C([O-])=O	InChI=1S/2C3H6O3.Ca.5H2O/c2*1-2(4)3(5)6;;;;;;/h2*2,4H,1H3,(H,5,6);;5*1H2/q;;+2;;;;;/p-2_x000D_	InChI=1/C3H6O3/c1-2(4)3(5)6/h2,4H,1H3,(H,5,6)	C3H6O3	90.0317	111.527	108.834	108.592	Lite	0	0	0	0	0	0	0	0	0	0
DTXCID003192	D-Lactic acid	10326-41-7	C[C@@H](O)C(O)=O	InChI=1S/C3H6O3/c1-2(4)3(5)6/h2,4H,1H3,(H,5,6)/t2-/m1/s1	InChI=1S/C3H6O3/c1-2(4)3(5)6/h2,4H,1H3,(H,5,6)/t2-/m1/s1	C3H6O3	90.0317	110.689	108.647	108.463	Lite	0	0	0	0	0	0	0	0	0	0
DTXCID003192	L-Lactic acid	79-33-4	C[C@H](O)C(O)=O	InChI=1S/C3H6O3/c1-2(4)3(5)6/h2,4H,1H3,(H,5,6)/t2-/m0/s1_x000D_	InChI=1S/C3H6O3/c1-2(4)3(5)6/h2,4H,1H3,(H,5,6)/t2-/m0/s1	C3H6O3	90.0317	110.947	108.994	108.555	Lite	0	0	0	0	0	0	0	0	0	0
DTXCID003192	Dihydroxyacetone	96-26-4	CC(=O)C(O)O	InChI=1S/C3H6O3/c1-2(4)3(5)6/h3,5-6H,1H3_x000D_	InChI=1S/C3H6O3/c1-2(4)3(5)6/h3,5-6H,1H3	C3H6O3	90.0317	110.755	109.609	109.263	Lite	0	0	0	0	0	0	0	0	0	0
DTXCID501925	1,3,5-Trioxane	110-88-3	C1OCOCO1	InChI=1S/C3H6O3/c1-4-2-6-3-5-1/h1-3H2	InChI=1S/C3H6O3/c1-4-2-6-3-5-1/h1-3H2	C3H6O3	90.0317	105.31	105.159	104.755	Lite	0	0	0	0	0	0	0	0	0	0
DTXCID609192	Dimethyl carbonate	616-38-6	COC(=O)OC	InChI=1S/C3H6O3/c1-5-3(4)6-2/h1-2H3	InChI=1S/C3H6O3/c1-5-3(4)6-2/h1-2H3	C3H6O3	90.0317	110.688	109.772	109.027	Lite	0	0	0	0	0	0	0	0	0	0
DTXCID9011591	Methoxyacetic acid	625-45-6	COCC(O)=O	InChI=1S/C3H6O3/c1-6-2-3(4)5/h2H2,1H3,(H,4,5)	InChI=1S/C3H6O3/c1-6-2-3(4)5/h2H2,1H3,(H,4,5)	C3H6O3	90.0317	109.845	108.979	108.704	Lite	0	0	0	0	0	0	0	0	0	0
DTXCID9021396	2-Butanethiol	513-53-1	CCC(C)S	InChI=1/C4H10S/c1-3-4(2)5/h4-5H,3H2,1-2H3	InChI=1/C4H10S/c1-3-4(2)5/h4-5H,3H2,1-2H3	C4H10S	90.0503			109.404	Lite	0	0	0	0	0	0	0	0	0	0
DTXCID306773	1,3-Butanediol	107-88-0	CC(O)CCO	InChI=1/C4H10O2/c1-4(6)2-3-5/h4-6H,2-3H2,1H3	InChI=1/C4H10O2/c1-4(6)2-3-5/h4-6H,2-3H2,1H3	C4H10O2	90.0681	111.018	110.101	110.669	Lite	0	0	0	0	0	0	0	0	0	0
DTXCID4020375	1,2-Butanediol	584-03-2	CCC(O)CO	InChI=1/C4H10O2/c1-2-4(6)3-5/h4-6H,2-3H2,1H3	InChI=1/C4H10O2/c1-2-4(6)3-5/h4-6H,2-3H2,1H3	C4H10O2	90.0681	111.819	111.193	111.283	Lite	0	0	0	0	0	0	0	0	0	0
DTXCID6021321	2,3-Butanediol	513-85-9	CC(O)C(C)O	InChI=1/C4H10O2/c1-3(5)4(2)6/h3-6H,1-2H3	InChI=1/C4H10O2/c1-3(5)4(2)6/h3-6H,1-2H3	C4H10O2	90.0681	111.268	110.803	110.809	Lite	0	0	0	0	0	0	0	0	0	0
DTXCID604087	2-Ethoxyethanol	110-80-5	CCOCCO	InChI=1S/C4H10O2/c1-2-6-4-3-5/h5H,2-4H2,1H3	InChI=1S/C4H10O2/c1-2-6-4-3-5/h5H,2-4H2,1H3	C4H10O2	90.0681	111.232	111.884	113.455	Lite	0	0	0	0	0	0	0	0	0	0
DTXCID804284	1-Methoxy-2-propanol	107-98-2	COCC(C)O	InChI=1/C4H10O2/c1-4(5)3-6-2/h4-5H,3H2,1-2H3	InChI=1/C4H10O2/c1-4(5)3-6-2/h4-5H,3H2,1-2H3	C4H10O2	90.0681	111.464	111.128	110.934	Lite	0	0	0	0	0	0	0	0	0	0
DTXCID804666	1,4-Butanediol	110-63-4	OCCCCO	InChI=1S/C4H10O2/c5-3-1-2-4-6/h5-6H,1-4H2	InChI=1S/C4H10O2/c5-3-1-2-4-6/h5-6H,1-4H2	C4H10O2	90.0681	111.922	110.629	110.233	Lite	0	0	0	0	0	0	0	0	0	0
DTXCID301346	Thiosemicarbazide	79-19-6	NNC(N)=S	InChI=1S/CH5N3S/c2-1(5)4-3/h3H2,(H3,2,4,5)	InChI=1S/CH5N3S/c2-1(5)4-3/h3H2,(H3,2,4,5)	CH5N3S	91.0204	106.675	106.407	105.591	Lite	0	0	0	0	0	0	0	0	0	0
DTXCID3027532	2-[(Hydroxymethyl)amino]ethanol	65184-12-5	OCCNCO	InChI=1S/C3H9NO2/c5-2-1-4-3-6/h4-6H,1-3H2_x000D_	InChI=1S/C3H9NO2/c5-2-1-4-3-6/h4-6H,1-3H2	C3H9NO2	91.0633	110.573	109.832	110.265	Lite	0	0	0	0	0	0	0	0	0	0
DTXCID406141	Thioglycolic acid	68-11-1	OC(=O)CS	InChI=1S/C2H4O2S/c3-2(4)1-5/h5H,1H2,(H,3,4)	InChI=1S/C2H4O2S/c3-2(4)1-5/h5H,1H2,(H,3,4)	C2H4O2S	91.9932			105.041	Lite	0	0	0	0	0	0	0	0	0	0
DTXCID8030392	3-Mercapto-1-propanol	19721-22-3	OCCCS	InChI=1S/C3H8OS/c4-2-1-3-5/h4-5H,1-3H2	InChI=1S/C3H8OS/c4-2-1-3-5/h4-5H,1-3H2	C3H8OS	92.0296	110.371	109.5	108.74	Lite	0	0	0	0	0	0	0	0	0	0
DTXCID40662	Glycerol	56-81-5	OCC(O)CO	InChI=1S/C3H8O3/c4-1-3(6)2-5/h3-6H,1-2H2	InChI=1S/C3H8O3/c4-1-3(6)2-5/h3-6H,1-2H2	C3H8O3	92.0473	109.814	108.683	108.534	Lite	0	0	0	0	0	0	0	0	0	0
DTXCID7021570	Chloroacetamide	79-07-2	NC(=O)CCl	InChI=1S/C2H4ClNO/c3-1-2(4)5/h1H2,(H2,4,5)	InChI=1S/C2H4ClNO/c3-1-2(4)5/h1H2,(H2,4,5)	C2H4ClNO	92.9981	99.4599	98.9236	98.6712	Lite	0	0	0	0	0	0	0	0	0	0
DTXCID001899	2-Methylpyridine	109-06-8	CC1=NC=CC=C1	InChI=1S/C6H7N/c1-6-4-2-3-5-7-6/h2-5H,1H3	InChI=1S/C6H7N/c1-6-4-2-3-5-7-6/h2-5H,1H3	C6H7N	93.0578	112.064	111.534	110.915	Lite	0	0	0	0	0	0	0	0	0	0
DTXCID201892	4-Methylpyridine	108-89-4	CC1=CC=NC=C1	InChI=1S/C6H7N/c1-6-2-4-7-5-3-6/h2-5H,1H3	InChI=1S/C6H7N/c1-6-2-4-7-5-3-6/h2-5H,1H3	C6H7N	93.0578	112.005	111.379	110.891	Lite	0	0	0	0	0	0	0	0	0	0
DTXCID201897	3-Methylpyridine	108-99-6	CC1=CC=CN=C1	InChI=1S/C6H7N/c1-6-3-2-4-7-5-6/h2-5H,1H3	InChI=1S/C6H7N/c1-6-3-2-4-7-5-6/h2-5H,1H3	C6H7N	93.0578	111.817	111.419	110.967	Lite	0	0	0	0	0	0	0	0	0	0
DTXCID9090	Aniline hydrochloride	142-04-1	Cl.NC1=CC=CC=C1	InChI=1S/C6H7N.ClH/c7-6-4-2-1-3-5-6;/h1-5H,7H2;1H	InChI=1S/C6H7N/c7-6-4-2-1-3-5-6/h1-5H,7H2	C6H7N	93.0578	111.434	110.738	110.415	Lite	0	0	0	0	0	0	0	0	0	0
DTXCID20901	Sodium chloroacetate	3926-62-3	[Na+].[O-]C(=O)CCl	InChI=1S/C2H3ClO2.Na/c3-1-2(4)5;/h1H2,(H,4,5);/q;+1/p-1	InChI=1S/C2H3ClO2/c3-1-2(4)5/h1H2,(H,4,5)	C2H3ClO2	93.9822			97.9838	Lite	0	0	0	0	0	0	0	0	0	0
DTXCID805117	Methyl disulfide	624-92-0	CSSC	InChI=1S/C2H6S2/c1-3-4-2/h1-2H3	InChI=1S/C2H6S2/c1-3-4-2/h1-2H3	C2H6S2	93.9911			106.307	Lite	0	0	0	0	0	0	0	0	0	0
DTXCID40101702	Sodium methylsiliconate	16589-43-8	[Na+].C[Si](O)(O)[O-]	InChI=1S/CH5O3Si.Na/c1-5(2,3)4;/h2-3H,1H3;/q-1;+1_x000D_	InChI=1S/CH6O3Si/c1-5(2,3)4/h2-4H,1H3	CH6O3Si	94.0086	102.819	99.9776	97.5779	Lite	0	0	0	0	0	0	0	0	0	0
DTXCID2023937	Dimethyl sulfone	67-71-0	CS(C)(=O)=O	InChI=1S/C2H6O2S/c1-5(2,3)4/h1-2H3	InChI=1S/C2H6O2S/c1-5(2,3)4/h1-2H3	C2H6O2S	94.0089	108.292	107.165	106.916	Lite	0	0	0	0	0	0	0	0	0	0
DTXCID604809	3-Chloro-1-propanol	627-30-5	OCCCCl	InChI=1S/C3H7ClO/c4-2-1-3-5/h5H,1-3H2	InChI=1S/C3H7ClO/c4-2-1-3-5/h5H,1-3H2	C3H7ClO	94.0185	102.893	102.063	101.86	Lite	0	0	0	0	0	0	0	0	0	0
DTXCID501124, DTXCID501124	Sodium phenolate, Phenol	139-02-6, 108-95-2	[Na+].[O-]C1=CC=CC=C1	InChI=1S/C6H6O.Na/c7-6-4-2-1-3-5-6;/h1-5,7H;/q;+1/p-1	InChI=1S/C6H6O/c7-6-4-2-1-3-5-6/h1-5,7H	C6H6O	94.0419	110.703	110.284	110.224	Lite	0	0	0	0	0	0	0	0	0	0
DTXCID2027620	2-Methylpyrazine	109-08-0	CC1=NC=CN=C1	InChI=1S/C5H6N2/c1-5-4-6-2-3-7-5/h2-4H,1H3	InChI=1S/C5H6N2/c1-5-4-6-2-3-7-5/h2-4H,1H3	C5H6N2	94.0531	111.28	110.784	110.449	Lite	0	0	0	0	0	0	0	0	0	0
DTXCID7027461	3-Pyridinamine	462-08-8	NC1=CN=CC=C1	InChI=1S/C5H6N2/c6-5-2-1-3-7-4-5/h1-4H,6H2	InChI=1S/C5H6N2/c6-5-2-1-3-7-4-5/h1-4H,6H2	C5H6N2	94.0531	110.685	109.975	109.721	Lite	0	0	0	0	0	0	0	0	0	0
DTXCID2030271	2-Pyridone	142-08-5	O=C1NC=CC=C1	InChI=1S/C5H5NO/c7-5-3-1-2-4-6-5/h1-4H,(H,6,7)	InChI=1S/C5H5NO/c7-5-3-1-2-4-6-5/h1-4H,(H,6,7)	C5H5NO	95.0371	110.211	109.615	109.642	Lite	0	0	0	0	0	0	0	0	0	0
DTXCID5030115	3-Pyridinol	109-00-2	OC1=CN=CC=C1	InChI=1S/C5H5NO/c7-5-2-1-3-6-4-5/h1-4,7H_x000D_	InChI=1S/C5H5NO/c7-5-2-1-3-6-4-5/h1-4,7H	C5H5NO	95.0371	110.372	109.677	109.494	Lite	0	0	0	0	0	0	0	0	0	0
DTXCID9030882	4-Pyridinol	626-64-2	OC1=CC=NC=C1	InChI=1S/C5H5NO/c7-5-1-3-6-4-2-5/h1-4H,(H,6,7)	InChI=1S/C5H5NO/c7-5-1-3-6-4-2-5/h1-4H,(H,6,7)	C5H5NO	95.0371	111.072	109.514	108.926	Lite	0	0	0	0	0	0	0	0	0	0
DTXCID1021580	Iminodiacetonitrile	628-87-5	N#CCNCC#N	InChI=1S/C4H5N3/c5-1-3-7-4-2-6/h7H,3-4H2	InChI=1S/C4H5N3/c5-1-3-7-4-2-6/h7H,3-4H2	C4H5N3	95.0483	118.324	118.157	118.005	Lite	0	0	0	0	0	0	0	0	0	0
DTXCID001438	1,1-Dichloroethylene	75-35-4	ClC(Cl)=C	InChI=1S/C2H2Cl2/c1-2(3)4/h1H2	InChI=1S/C2H2Cl2/c1-2(3)4/h1H2	C2H2Cl2	95.9534			86.2491	Lite	0	0	0	0	0	0	0	0	0	0
DTXCID304030	(E)-1,2-Dichloroethylene	156-60-5	Cl\C=C\Cl	InChI=1S/C2H2Cl2/c3-1-2-4/h1-2H/b2-1+	InChI=1S/C2H2Cl2/c3-1-2-4/h1-2H/b2-1+	C2H2Cl2	95.9534			86.1654	Lite	0	0	0	0	0	0	0	0	0	0
DTXCID8028054	Hydroxymethanesulfinic acid monosodium salt dihydrate	6035-47-8	O.O.[Na+].OS(=O)C[O-]	InChI=1/CH3O3S.Na.2H2O/c2-1-5(3)4;;;/h1H2,(H,3,4);;2*1H2/q-1;+1;;	InChI=1/CH4O3S/c2-1-5(3)4/h2H,1H2,(H,3,4)	CH4O3S	95.9881	121.725	128.802	113.22	Standard	0	0	0	0	0	0	0	0	0	0
DTXCID50647	Furfural	98-01-1	O=CC1=CC=CO1	InChI=1S/C5H4O2/c6-4-5-2-1-3-7-5/h1-4H	InChI=1S/C5H4O2/c6-4-5-2-1-3-7-5/h1-4H	C5H4O2	96.0211	110.244	110.032	109.46	Lite	0	0	0	0	0	0	0	0	0	0
DTXCID102093	2,5-Dimethylfuran	625-86-5	CC1=CC=C(C)O1	InChI=1S/C6H8O/c1-5-3-4-6(2)7-5/h3-4H,1-2H3	InChI=1S/C6H8O/c1-5-3-4-6(2)7-5/h3-4H,1-2H3	C6H8O	96.0575	113.884	113.494	113.139	Lite	0	0	0	0	0	0	0	0	0	0
NoDTXCID11, DTXCID4014005	Ammonium sulfamate, Sulfamic acid	7773-06-0, 5329-14-6	[NH4+].NS([O-])(=O)=O	InChI=1S/H3NO3S.H3N/c1-5(2,3)4;/h(H3,1,2,3,4);1H3	InChI=1S/H3NO3S/c1-5(2,3)4/h(H3,1,2,3,4)	H3NO3S	96.9834				NA	0	0	0	0	0	0	0	0	0	0
DTXCID6030867	Furfurylamine	617-89-0	NCC1=CC=CO1	InChI=1S/C5H7NO/c6-4-5-2-1-3-7-5/h1-3H,4,6H2	InChI=1S/C5H7NO/c6-4-5-2-1-3-7-5/h1-3H,4,6H2	C5H7NO	97.0528	112.437	111.979	111.396	Lite	0	0	0	0	0	0	0	0	0	0
DTXCID704918	Diallylamine	124-02-7	C=CCNCC=C	InChI=1S/C6H11N/c1-3-5-7-6-4-2/h3-4,7H,1-2,5-6H2	InChI=1S/C6H11N/c1-3-5-7-6-4-2/h3-4,7H,1-2,5-6H2	C6H11N	97.0891	121.72	120.74	120.708	Lite	0	0	0	0	0	0	0	0	0	0
NoDTXCID12	Hydrazine sulfate	10034-93-2	NN.OS(O)(=O)=O	InChI=1S/H4N2.H2O4S/c1-2;1-5(2,3)4/h1-2H2;(H2,1,2,3,4)	InChI=1S/H2O4S/c1-5(2,3)4/h(H2,1,2,3,4)	H2O4S	97.9674				NA	0	0	0	0	0	0	0	0	0	0
DTXCID40438	1,2-Dichloroethane	107-06-2	ClCCCl	InChI=1S/C2H4Cl2/c3-1-2-4/h1-2H2	InChI=1S/C2H4Cl2/c3-1-2-4/h1-2H2	C2H4Cl2	97.969			88.4203	Lite	0	0	0	0	0	0	0	0	0	0
NoDTXCID13, DTXCID804263	Diammonium hydrogen phosphate, Phosphoric acid	7783-28-0, 7664-38-2	[NH4+].[NH4+].OP([O-])([O-])=O	InChI=1S/2H3N.H3O4P/c;;1-5(2,3)4/h2*1H3;(H3,1,2,3,4)_x000D_	InChI=1S/H3O4P/c1-5(2,3)4/h(H3,1,2,3,4)	H3O4P	97.9769				NA	0	0	1	0	0	0	0	0	0	0
DTXCID804166	2,5-Furandione	108-31-6	O=C1OC(=O)C=C1	InChI=1S/C4H2O3/c5-3-1-2-4(6)7-3/h1-2H	InChI=1S/C4H2O3/c5-3-1-2-4(6)7-3/h1-2H	C4H2O3	98.0004	109.965	109.631	109.033	Lite	0	0	0	0	0	0	0	0	0	0
DTXCID105347	Furfuryl alcohol	98-00-0	OCC1=CC=CO1	InChI=1S/C5H6O2/c6-4-5-2-1-3-7-5/h1-3,6H,4H2	InChI=1S/C5H6O2/c6-4-5-2-1-3-7-5/h1-3,6H,4H2	C5H6O2	98.0368	111.495	111.239	111.181	Lite	0	0	0	0	0	0	0	0	0	0
DTXCID5027693	alpha-Angelica lactone	591-12-8	CC1=CCC(=O)O1	InChI=1S/C5H6O2/c1-4-2-3-5(6)7-4/h2H,3H2,1H3	InChI=1S/C5H6O2/c1-4-2-3-5(6)7-4/h2H,3H2,1H3	C5H6O2	98.0368	113.315	112.744	112.187	Lite	0	0	0	0	0	0	0	0	0	0
DTXCID6030106	3-Methyl-5-pyrazolone	108-26-9	CC1=NNC(=O)C1	InChI=1S/C4H6N2O/c1-3-2-4(7)6-5-3/h2H2,1H3,(H,6,7)_x000D_	InChI=1S/C4H6N2O/c1-3-2-4(7)6-5-3/h2H,1H3,(H2,5,6,7)	C4H6N2O	98.048	113.05	112.39	112.127	Lite	0	0	0	0	0	0	0	0	0	0
DTXCID00359	Cyclohexanone	108-94-1	O=C1CCCCC1	InChI=1S/C6H10O/c7-6-4-2-1-3-5-6/h1-5H2	InChI=1S/C6H10O/c7-6-4-2-1-3-5-6/h1-5H2	C6H10O	98.0732	113.123	113.309	112.925	Lite	0	0	0	0	0	0	0	0	0	0
DTXCID00911804	3-Methyl-3-penten-2-one	565-62-8	CC=C(C)C(C)=O	InChI=1S/C6H10O/c1-4-5(2)6(3)7/h4H,1-3H3	InChI=1S/C6H10O/c1-4-5(2)6(3)7/h4H,1-3H3	C6H10O	98.0732	117.471	116.773	116.426	Lite	0	0	0	0	0	0	0	0	0	0
DTXCID10210254	4-Hexen-3-one	2497-21-4	CCC(=O)C=CC	InChI=1S/C6H10O/c1-3-5-6(7)4-2/h3,5H,4H2,1-2H3	InChI=1S/C6H10O/c1-3-5-6(7)4-2/h3,5H,4H2,1-2H3	C6H10O	98.0732	120.604	120.376	119.948	Lite	0	0	0	0	0	0	0	0	0	0
DTXCID1027631	(2E,4E)-Hexa-2,4-dien-1-ol	17102-64-6	C\C=C\C=C\CO	InChI=1S/C6H10O/c1-2-3-4-5-6-7/h2-5,7H,6H2,1H3/b3-2+,5-4+	InChI=1S/C6H10O/c1-2-3-4-5-6-7/h2-5,7H,6H2,1H3/b3-2+,5-4+	C6H10O	98.0732	123.166	122.241	122.049	Lite	0	0	0	0	0	0	0	0	0	0
DTXCID209170	4-Methylpent-3-en-2-one	141-79-7	CC(C)=CC(C)=O	InChI=1S/C6H10O/c1-5(2)4-6(3)7/h4H,1-3H3	InChI=1S/C6H10O/c1-5(2)4-6(3)7/h4H,1-3H3	C6H10O	98.0732	118.744	118.347	117.744	Lite	0	0	0	0	0	0	0	0	0	0
DTXCID5030088	Hex-1-yn-3-ol	105-31-7	CCCC(O)C#C	InChI=1/C6H10O/c1-3-5-6(7)4-2/h2,6-7H,3,5H2,1H3	InChI=1/C6H10O/c1-3-5-6(7)4-2/h2,6-7H,3,5H2,1H3	C6H10O	98.0732	119.544	119.193	119.231	Lite	0	0	0	0	0	0	0	0	0	0
DTXCID60210527	2-Methylpent-2-enal	623-36-9	CCC=C(C)C=O	InChI=1S/C6H10O/c1-3-4-6(2)5-7/h4-5H,3H2,1-2H3	InChI=1S/C6H10O/c1-3-4-6(2)5-7/h4-5H,3H2,1-2H3	C6H10O	98.0732	117.904	117.602	117.358	Lite	0	0	0	0	0	0	0	0	0	0
DTXCID9021425	(2E)-2-Hexenal	6728-26-3	CCC\C=C\C=O	InChI=1S/C6H10O/c1-2-3-4-5-6-7/h4-6H,2-3H2,1H3/b5-4+	InChI=1S/C6H10O/c1-2-3-4-5-6-7/h4-6H,2-3H2,1H3/b5-4+	C6H10O	98.0732	121.19	120.223	119.347	Lite	0	0	0	0	0	0	0	0	0	0
DTXCID207432	3-Dimethylaminopropionitrile	1738-25-6	CN(C)CCC#N	InChI=1S/C5H10N2/c1-7(2)5-3-4-6/h3,5H2,1-2H3	InChI=1S/C5H10N2/c1-7(2)5-3-4-6/h3,5H2,1-2H3	C5H10N2	98.0844	118.358	116.705	116.464	Lite	0	0	0	0	0	0	0	0	0	0
DTXCID607572	2-Amino-2-methyl-butyronitrile	4475-95-0	CCC(C)(N)C#N	InChI=1S/C5H10N2/c1-3-5(2,7)4-6/h3,7H2,1-2H3_x000D_	InChI=1/C5H10N2/c1-3-5(2,7)4-6/h3,7H2,1-2H3	C5H10N2	98.0844	117.305	117.149	116.876	Lite	0	0	0	0	0	0	0	0	0	0
DTXCID3031078	2-Methylpent-1-ene	763-29-1	CCCCC(C)=C	InChI=1S/C7H14/c1-4-5-6-7(2)3/h2,4-6H2,1,3H3	InChI=1S/C7H14/c1-4-5-6-7(2)3/h2,4-6H2,1,3H3	C7H14	98.1096			119.752	Lite	0	0	0	0	0	0	0	0	0	0
DTXCID4027733	Methylcyclohexane	108-87-2	CC1CCCCC1	InChI=1S/C7H14/c1-7-5-3-2-4-6-7/h7H,2-6H2,1H3	InChI=1S/C7H14/c1-7-5-3-2-4-6-7/h7H,2-6H2,1H3	C7H14	98.1096				NA	0	0	0	0	0	0	0	0	0	0
DTXCID8047	Allyl isothiocyanate	57-06-7	C=CCN=C=S	InChI=1S/C4H5NS/c1-2-3-5-4-6/h2H,1,3H2	InChI=1S/C4H5NS/c1-2-3-5-4-6/h2H,1,3H2	C4H5NS	99.0143	113.321	113.337	112.727	Lite	0	0	0	0	0	0	0	0	0	0
DTXCID1012622	Hymexazol	10004-44-1	CC1=CC(=O)NO1	InChI=1S/C4H5NO2/c1-3-2-4(6)5-7-3/h2H,1H3,(H,5,6)	InChI=1S/C4H5NO2/c1-3-2-4(6)5-7-3/h2H,1H3,(H,5,6)	C4H5NO2	99.032	111.487	110.8	110.671	Lite	0	0	0	0	0	0	0	0	0	0
DTXCID3030181	Succinimide	123-56-8	O=C1CCC(=O)N1	InChI=1S/C4H5NO2/c6-3-1-2-4(7)5-3/h1-2H2,(H,5,6,7)	InChI=1S/C4H5NO2/c6-3-1-2-4(7)5-3/h1-2H2,(H,5,6,7)	C4H5NO2	99.032	112.369	111.833	111.541	Lite	0	0	0	0	0	0	0	0	0	0
DTXCID2030566	N-Methyl-N-vinylacetamide	3195-78-6	CN(C=C)C(C)=O	InChI=1S/C5H9NO/c1-4-6(3)5(2)7/h4H,1H2,2-3H3_x000D_	InChI=1S/C5H9NO/c1-4-6(3)5(2)7/h4H,1H2,2-3H3	C5H9NO	99.0684	116.149	115.708	115.321	Lite	0	0	0	0	0	0	0	0	0	0
DTXCID3030507	N,N-Dimethylacrylamide	2680-03-07	CN(C)C(=O)C=C	InChI=1S/C5H9NO/c1-4-5(7)6(2)3/h4H,1H2,2-3H3	InChI=1S/C5H9NO/c1-4-5(7)6(2)3/h4H,1H2,2-3H3	C5H9NO	99.0684	116.87	116.564	116.135	Lite	0	0	0	0	0	0	0	0	0	0
DTXCID60856	N-Methyl-2-pyrrolidone	872-50-4	CN1CCCC1=O	InChI=1S/C5H9NO/c1-6-4-2-3-5(6)7/h2-4H2,1H3	InChI=1S/C5H9NO/c1-6-4-2-3-5(6)7/h2-4H2,1H3	C5H9NO	99.0684	113.739	113.719	113.346	Lite	0	0	0	0	0	0	0	0	0	0
DTXCID007798	N-Ethyl-2-methyl-2-propen-1-amine	18328-90-0	CCNCC(C)=C	InChI=1S/C6H13N/c1-4-7-5-6(2)3/h7H,2,4-5H2,1,3H3	InChI=1S/C6H13N/c1-4-7-5-6(2)3/h7H,2,4-5H2,1,3H3	C6H13N	99.1048	121.93	120.644	120.588	Lite	0	0	0	0	0	0	0	0	0	0
DTXCID203996, DTXCID203996	Cyclohexylamine, Cyclohexylamine hydrochloride	108-91-8, 4998-76-9	NC1CCCCC1	InChI=1S/C6H13N/c7-6-4-2-1-3-5-6/h6H,1-5,7H2	InChI=1S/C6H13N/c7-6-4-2-1-3-5-6/h6H,1-5,7H2	C6H13N	99.1048	116.035	115.289	114.817	Lite	0	0	0	0	0	0	0	0	0	0
DTXCID906879	Hexamethyleneimine	111-49-9	C1CCCNCC1	InChI=1S/C6H13N/c1-2-4-6-7-5-3-1/h7H,1-6H2	InChI=1S/C6H13N/c1-2-4-6-7-5-3-1/h7H,1-6H2	C6H13N	99.1048	114.39	114.009	113.644	Lite	0	0	0	0	0	0	0	0	0	0
NoDTXCID14, NoDTXCID14	Potassium perchlorate, Ammonium perchlorate	7778-74-7, 7790-98-9	[K+].[O-][Cl](=O)(=O)=O	InChI=1S/ClHO4.K/c2-1(3,4)5;/h(H,2,3,4,5);/q;+1/p-1	InChI=1S/ClHO4/c2-1(3,4)5/h(H,2,3,4,5)	ClHO4	99.9563				NA	0	0	0	0	0	0	0	0	0	0
DTXCID701287	Succinic anhydride	108-30-5	O=C1CCC(=O)O1	InChI=1S/C4H4O3/c5-3-1-2-4(6)7-3/h1-2H2	InChI=1S/C4H4O3/c5-3-1-2-4(6)7-3/h1-2H2	C4H4O3	100.016	111.642	111.112	110.628	Lite	0	0	0	0	0	0	0	0	0	0
DTXCID3030680	Hydantoin	461-72-3	O=C1CNC(=O)N1	InChI=1S/C3H4N2O2/c6-2-1-4-3(7)5-2/h1H2,(H2,4,5,6,7)_x000D_	InChI=1S/C3H4N2O2/c6-2-1-4-3(7)5-2/h1H2,(H2,4,5,6,7)	C3H4N2O2	100.027	110.722	111.208	109.64	Lite	0	0	0	0	0	0	0	0	0	0
NoDTXCID15, NoDTXCID15, NoDTXCID15	Chromium(III) acetylacetonate, Iron(III) acetylacetonate, Aluminum trisacetoacetate	21679-31-2, 14024-18-1, 13963-57-0	CC(=O)[CH-]\C(C)=[O+]/[Cr](\[O+]=C(\C)[CH-]C(C)=O)\[O+]=C(\C)[CH-]C(C)=O	InChI=1S/3C5H7O2.Cr/c3*1-4(6)3-5(2)7;/h3*3H,1-2H3;/q3*-1;+3	InChI=1S/C5H8O2/c1-4(6)3-5(2)7/h3,6H,1-2H3	C5H8O2	100.052	117.479	116.796	116.949	Lite	0	0	0	0	0	0	0	0	0	0
DTXCID0027145	3,3-Dimethylacrylic acid	541-47-9	CC(C)=CC(O)=O	InChI=1S/C5H8O2/c1-4(2)3-5(6)7/h3H,1-2H3,(H,6,7)	InChI=1S/C5H8O2/c1-4(2)3-5(6)7/h3H,1-2H3,(H,6,7)	C5H8O2	100.052			116.168	Lite	0	0	0	0	0	0	0	0	0	0
DTXCID0030530	Methyl cyclopropanecarboxylate	2868-37-3	COC(=O)C1CC1	InChI=1S/C5H8O2/c1-7-5(6)4-2-3-4/h4H,2-3H2,1H3_x000D_	InChI=1S/C5H8O2/c1-7-5(6)4-2-3-4/h4H,2-3H2,1H3	C5H8O2	100.052	114.752	114.471	114.088	Lite	0	0	0	0	0	0	0	0	0	0
DTXCID00583	Ethyl acrylate	140-88-5	CCOC(=O)C=C	InChI=1S/C5H8O2/c1-3-5(6)7-4-2/h3H,1,4H2,2H3	InChI=1S/C5H8O2/c1-3-5(6)7-4-2/h3H,1,4H2,2H3	C5H8O2	100.052	117.146	116.791	116.281	Lite	0	0	0	0	0	0	0	0	0	0
DTXCID1011492	Isopropenyl acetate	108-22-5	CC(=C)OC(C)=O	InChI=1S/C5H8O2/c1-4(2)7-5(3)6/h1H2,2-3H3	InChI=1S/C5H8O2/c1-4(2)7-5(3)6/h1H2,2-3H3	C5H8O2	100.052	115.14	116.726	115.776	Lite	0	0	0	0	0	0	0	0	0	0
DTXCID4024438	Tetrahydro-2H-pyran-2-one	542-28-9	O=C1CCCCO1	InChI=1S/C5H8O2/c6-5-3-1-2-4-7-5/h1-4H2	InChI=1S/C5H8O2/c6-5-3-1-2-4-7-5/h1-4H2	C5H8O2	100.052	112.879	112.55	111.944	Lite	0	0	0	0	0	0	0	0	0	0
DTXCID605355	Glutaraldehyde	111-30-8	O=CCCCC=O	InChI=1S/C5H8O2/c6-4-2-1-3-5-7/h4-5H,1-3H2	InChI=1S/C5H8O2/c6-4-2-1-3-5-7/h4-5H,1-3H2	C5H8O2	100.052	119.052	118.292	117.737	Lite	0	0	0	0	0	0	0	0	0	0
DTXCID7027677	2-Methyldihydrofuran-3(2H)-one	3188-00-9	CC1OCCC1=O	InChI=1/C5H8O2/c1-4-5(6)2-3-7-4/h4H,2-3H2,1H3	InChI=1/C5H8O2/c1-4-5(6)2-3-7-4/h4H,2-3H2,1H3	C5H8O2	100.052	113.452	113.427	112.978	Lite	0	0	0	0	0	0	0	0	0	0
DTXCID8024448	4-Pentenoic acid	591-80-0	OC(=O)CCC=C	InChI=1S/C5H8O2/c1-2-3-4-5(6)7/h2H,1,3-4H2,(H,6,7)	InChI=1S/C5H8O2/c1-2-3-4-5(6)7/h2H,1,3-4H2,(H,6,7)	C5H8O2	100.052			116.419	Lite	0	0	0	0	0	0	0	0	0	0
DTXCID8027618	4-Pentanolide	108-29-2	CC1CCC(=O)O1	InChI=1/C5H8O2/c1-4-2-3-5(6)7-4/h4H,2-3H2,1H3	InChI=1/C5H8O2/c1-4-2-3-5(6)7-4/h4H,2-3H2,1H3	C5H8O2	100.052	113.654	113.14	112.972	Lite	0	0	0	0	0	0	0	0	0	0
DTXCID701062	N-Nitrosopyrrolidine	930-55-2	O=NN1CCCC1	InChI=1S/C4H8N2O/c7-5-6-3-1-2-4-6/h1-4H2	InChI=1S/C4H8N2O/c7-5-6-3-1-2-4-6/h1-4H2	C4H8N2O	100.064	114.866	113.304	112.904	Lite	0	0	0	0	0	0	0	0	0	0
DTXCID001894	Cyclohexanol	108-93-0	OC1CCCCC1	InChI=1S/C6H12O/c7-6-4-2-1-3-5-6/h6-7H,1-5H2	InChI=1S/C6H12O/c7-6-4-2-1-3-5-6/h6-7H,1-5H2	C6H12O	100.089	115.707	114.71	114.488	Lite	0	0	0	0	0	0	0	0	0	0
DTXCID0027062	(E)-2-Hexen-1-ol	928-95-0	CCC\C=C\CO	InChI=1S/C6H12O/c1-2-3-4-5-6-7/h4-5,7H,2-3,6H2,1H3/b5-4+	InChI=1S/C6H12O/c1-2-3-4-5-6-7/h4-5,7H,2-3,6H2,1H3/b5-4+	C6H12O	100.089	122.954	122.057	121.991	Lite	0	0	0	0	0	0	0	0	0	0
DTXCID201978	2-Methylpentanal	123-15-9	CCCC(C)C=O	InChI=1/C6H12O/c1-3-4-6(2)5-7/h5-6H,3-4H2,1-2H3	InChI=1/C6H12O/c1-3-4-6(2)5-7/h5-6H,3-4H2,1-2H3	C6H12O	100.089	120.054	119.904	119.867	Lite	0	0	0	0	0	0	0	0	0	0
DTXCID202068	2-Hexanone	591-78-6	CCCCC(C)=O	InChI=1S/C6H12O/c1-3-4-5-6(2)7/h3-5H2,1-2H3_x000D_	InChI=1S/C6H12O/c1-3-4-5-6(2)7/h3-5H2,1-2H3	C6H12O	100.089	119.482	118.868	118.355	Lite	0	0	0	0	0	0	0	0	0	0
DTXCID502138	(E)-3-Hexen-1-ol	928-97-2	CC\C=C\CCO	InChI=1S/C6H12O/c1-2-3-4-5-6-7/h3-4,7H,2,5-6H2,1H3/b4-3+	InChI=1S/C6H12O/c1-2-3-4-5-6-7/h3-4,7H,2,5-6H2,1H3/b4-3+	C6H12O	100.089	122.949	121.998	122.132	Lite	0	0	0	0	0	0	0	0	0	0
DTXCID502138	(Z)-3-Hexen-1-ol	928-96-1	CC\C=C/CCO	InChI=1S/C6H12O/c1-2-3-4-5-6-7/h3-4,7H,2,5-6H2,1H3/b4-3-	InChI=1S/C6H12O/c1-2-3-4-5-6-7/h3-4,7H,2,5-6H2,1H3/b4-3-	C6H12O	100.089	121.765	121.052	120.942	Lite	0	0	0	0	0	0	0	0	0	0
DTXCID701889	4-Methyl-2-pentanone	108-10-1	CC(C)CC(C)=O	InChI=1S/C6H12O/c1-5(2)4-6(3)7/h5H,4H2,1-3H3	InChI=1S/C6H12O/c1-5(2)4-6(3)7/h5H,4H2,1-3H3	C6H12O	100.089	119.894	119.198	118.756	Lite	0	0	0	0	0	0	0	0	0	0
DTXCID901604	Hexanal	66-25-1	CCCCCC=O	InChI=1S/C6H12O/c1-2-3-4-5-6-7/h6H,2-5H2,1H3	InChI=1S/C6H12O/c1-2-3-4-5-6-7/h6H,2-5H2,1H3	C6H12O	100.089	120.175	120.142	119.426	Lite	0	0	0	0	0	0	0	0	0	0
DTXCID9030127	Butyl vinyl ether	111-34-2	CCCCOC=C	InChI=1S/C6H12O/c1-3-5-6-7-4-2/h4H,2-3,5-6H2,1H3	InChI=1S/C6H12O/c1-3-5-6-7-4-2/h4H,2-3,5-6H2,1H3	C6H12O	100.089	118.357	117.53	117.071	Lite	0	0	0	0	0	0	0	0	0	0
DTXCID0030827	2-Methylhexane	591-76-4	CCCCC(C)C	InChI=1S/C7H16/c1-4-5-6-7(2)3/h7H,4-6H2,1-3H3_x000D_	InChI=1S/C7H16/c1-4-5-6-7(2)3/h7H,4-6H2,1-3H3	C7H16	100.125				NA	0	0	0	0	0	0	0	0	0	0
DTXCID4030413	Allyl carbamate	2114-11-06	NC(=O)OCC=C	InChI=1S/C4H7NO2/c1-2-3-7-4(5)6/h2H,1,3H2,(H2,5,6)	InChI=1S/C4H7NO2/c1-2-3-7-4(5)6/h2H,1,3H2,(H2,5,6)	C4H7NO2	101.048	114.852	115.156	115.06	Lite	0	0	0	0	0	0	0	0	0	0
DTXCID9020164	3-Oxobutanamide	5977-14-0	CC(=O)CC(N)=O	InChI=1S/C4H7NO2/c1-3(6)2-4(5)7/h2H2,1H3,(H2,5,7)	InChI=1S/C4H7NO2/c1-3(6)2-4(5)7/h2H2,1H3,(H2,5,7)	C4H7NO2	101.048	116.404	115.718	115.539	Lite	0	0	0	0	0	0	0	0	0	0
DTXCID90885	N-Methylolacrylamide	924-42-5	OCNC(=O)C=C	InChI=1S/C4H7NO2/c1-2-4(7)5-3-6/h2,6H,1,3H2,(H,5,7)_x000D_	InChI=1S/C4H7NO2/c1-2-4(7)5-3-6/h2,6H,1,3H2,(H,5,7)	C4H7NO2	101.048	116.768	116.199	116.34	Lite	0	0	0	0	0	0	0	0	0	0
DTXCID709146	4-Methylmorpholine	109-02-4	CN1CCOCC1	InChI=1S/C5H11NO/c1-6-2-4-7-5-3-6/h2-5H2,1H3	InChI=1S/C5H11NO/c1-6-2-4-7-5-3-6/h2-5H2,1H3	C5H11NO	101.084	114.442	113.954	113.666	Lite	0	0	0	0	0	0	0	0	0	0
DTXCID8012314	4,4-Dimethyloxazolidine	51200-87-4	CC1(C)COCN1	InChI=1S/C5H11NO/c1-5(2)3-7-4-6-5/h6H,3-4H2,1-2H3	InChI=1S/C5H11NO/c1-5(2)3-7-4-6-5/h6H,3-4H2,1-2H3	C5H11NO	101.084	114.277	113.904	113.879	Lite	0	0	0	0	0	0	0	0	0	0
DTXCID105185	Dipropylamine	142-84-7	CCCNCCC	InChI=1S/C6H15N/c1-3-5-7-6-4-2/h7H,3-6H2,1-2H3	InChI=1S/C6H15N/c1-3-5-7-6-4-2/h7H,3-6H2,1-2H3	C6H15N	101.12	122.057	121.489	121.269	Lite	0	0	0	0	0	0	0	0	0	0
DTXCID204366	Triethylamine	121-44-8	CCN(CC)CC	InChI=1S/C6H15N/c1-4-7(5-2)6-3/h4-6H2,1-3H3	InChI=1S/C6H15N/c1-4-7(5-2)6-3/h4-6H2,1-3H3	C6H15N	101.12	120.035	119.633		Lite	0	0	0	0	0	0	0	0	0	0
DTXCID6027472	N,N-Dimethylbutylamine	927-62-8	CCCCN(C)C	InChI=1S/C6H15N/c1-4-5-6-7(2)3/h4-6H2,1-3H3	InChI=1S/C6H15N/c1-4-5-6-7(2)3/h4-6H2,1-3H3	C6H15N	101.12	121	120.611	120.214	Lite	0	0	0	0	0	0	0	0	0	0
DTXCID90601	Ethylene thiourea	96-45-7	S=C1NCCN1	InChI=1S/C3H6N2S/c6-3-4-1-2-5-3/h1-2H2,(H2,4,5,6)	InChI=1S/C3H6N2S/c6-3-4-1-2-5-3/h1-2H2,(H2,4,5,6)	C3H6N2S	102.025	110.066	109.461	108.75	Lite	0	0	0	0	0	0	0	0	0	0
DTXCID006789	Propylene carbonate	108-32-7	CC1COC(=O)O1	InChI=1/C4H6O3/c1-3-2-6-4(5)7-3/h3H,2H2,1H3	InChI=1/C4H6O3/c1-3-2-6-4(5)7-3/h3H,2H2,1H3	C4H6O3	102.032	112.372	112.512	111.991	Lite	0	0	0	0	0	0	0	0	0	0
DTXCID9027108	Cyclopentanethiol	1679-07-8	SC1CCCC1	InChI=1S/C5H10S/c6-5-3-1-2-4-5/h5-6H,1-4H2	InChI=1S/C5H10S/c6-5-3-1-2-4-5/h5-6H,1-4H2	C5H10S	102.05			111.624	Lite	0	0	0	0	0	0	0	0	0	0
DTXCID301621	2-Methylbutanoic acid	116-53-0	CCC(C)C(O)=O	InChI=1/C5H10O2/c1-3-4(2)5(6)7/h4H,3H2,1-2H3,(H,6,7)	InChI=1/C5H10O2/c1-3-4(2)5(6)7/h4H,3H2,1-2H3,(H,6,7)	C5H10O2	102.068			116.969	Lite	0	0	0	0	0	0	0	0	0	0
DTXCID301901	Propyl acetate	109-60-4	CCCOC(C)=O	InChI=1S/C5H10O2/c1-3-4-7-5(2)6/h3-4H2,1-2H3	InChI=1S/C5H10O2/c1-3-4-7-5(2)6/h3-4H2,1-2H3	C5H10O2	102.068	116.309	117.072	116.578	Lite	0	0	0	0	0	0	0	0	0	0
DTXCID3027083	Methyl butyrate	623-42-7	CCCC(=O)OC	InChI=1S/C5H10O2/c1-3-4-5(6)7-2/h3-4H2,1-2H3	InChI=1S/C5H10O2/c1-3-4-5(6)7-2/h3-4H2,1-2H3	C5H10O2	102.068	118.168	117.853	117.475	Lite	0	0	0	0	0	0	0	0	0	0
DTXCID309182	Isovaleric acid	503-74-2	CC(C)CC(O)=O	InChI=1S/C5H10O2/c1-4(2)3-5(6)7/h4H,3H2,1-2H3,(H,6,7)	InChI=1S/C5H10O2/c1-4(2)3-5(6)7/h4H,3H2,1-2H3,(H,6,7)	C5H10O2	102.068			117.313	Lite	0	0	0	0	0	0	0	0	0	0
DTXCID605478	Isopropyl acetate	108-21-4	CC(C)OC(C)=O	InChI=1S/C5H10O2/c1-4(2)7-5(3)6/h4H,1-3H3	InChI=1S/C5H10O2/c1-4(2)7-5(3)6/h4H,1-3H3	C5H10O2	102.068	117.048	117.327	116.374	Lite	0	0	0	0	0	0	0	0	0	0
DTXCID801655	Pentanoic acid	109-52-4	CCCCC(O)=O	InChI=1S/C5H10O2/c1-2-3-4-5(6)7/h2-4H2,1H3,(H,6,7)	InChI=1S/C5H10O2/c1-2-3-4-5(6)7/h2-4H2,1H3,(H,6,7)	C5H10O2	102.068			116.679	Lite	0	0	0	0	0	0	0	0	0	0
DTXCID9020110	Ethyl propionate	105-37-3	CCOC(=O)CC	InChI=1S/C5H10O2/c1-3-5(6)7-4-2/h3-4H2,1-2H3	InChI=1S/C5H10O2/c1-3-5(6)7-4-2/h3-4H2,1-2H3	C5H10O2	102.068	118.283	117.943	117.636	Lite	0	0	0	0	0	0	0	0	0	0
DTXCID909128	Tetrahydrofurfuryl alcohol	97-99-4	OCC1CCCO1	InChI=1/C5H10O2/c6-4-5-2-1-3-7-5/h5-6H,1-4H2	InChI=1/C5H10O2/c6-4-5-2-1-3-7-5/h5-6H,1-4H2	C5H10O2	102.068	115.341	114.606	114.471	Lite	0	0	0	0	0	0	0	0	0	0
DTXCID901028	N-Nitrosodiethylamine	55-18-5	CCN(CC)N=O	InChI=1S/C4H10N2O/c1-3-6(4-2)5-7/h3-4H2,1-2H3	InChI=1S/C4H10N2O/c1-3-6(4-2)5-7/h3-4H2,1-2H3	C4H10N2O	102.079	119.446	117.887	117.439	Lite	0	0	0	0	0	0	0	0	0	0
DTXCID0021416	2-Ethyl-1-butanol	97-95-0	CCC(CC)CO	InChI=1S/C6H14O/c1-3-6(4-2)5-7/h6-7H,3-5H2,1-2H3	InChI=1S/C6H14O/c1-3-6(4-2)5-7/h6-7H,3-5H2,1-2H3	C6H14O	102.105	120.063	119.729	119.841	Lite	0	0	0	0	0	0	0	0	0	0
DTXCID201931	1-Hexanol	111-27-3	CCCCCCO	InChI=1S/C6H14O/c1-2-3-4-5-6-7/h7H,2-6H2,1H3	InChI=1S/C6H14O/c1-2-3-4-5-6-7/h7H,2-6H2,1H3	C6H14O	102.105	122.264	121.777	121.555	Lite	0	0	0	0	0	0	0	0	0	0
DTXCID4030883	1-Ethoxybutane	628-81-9	CCCCOCC	InChI=1S/C6H14O/c1-3-5-6-7-4-2/h3-6H2,1-2H3	InChI=1S/C6H14O/c1-3-5-6-7-4-2/h3-6H2,1-2H3	C6H14O	102.105	120.568	120.005	119.58	Lite	0	0	0	0	0	0	0	0	0	0
DTXCID6022343	Propyl ether	111-43-3	CCCOCCC	InChI=1S/C6H14O/c1-3-5-7-6-4-2/h3-6H2,1-2H3	InChI=1S/C6H14O/c1-3-5-7-6-4-2/h3-6H2,1-2H3	C6H14O	102.105	120.648	120.579	120.083	Lite	0	0	0	0	0	0	0	0	0	0
DTXCID608683	4-Methylpentan-1-ol	626-89-1	CC(C)CCCO	InChI=1S/C6H14O/c1-6(2)4-3-5-7/h6-7H,3-5H2,1-2H3	InChI=1S/C6H14O/c1-6(2)4-3-5-7/h6-7H,3-5H2,1-2H3	C6H14O	102.105	121.018	120.238	120.2	Lite	0	0	0	0	0	0	0	0	0	0
DTXCID806781	4-Methyl-2-pentanol	108-11-2	CC(C)CC(C)O	InChI=1/C6H14O/c1-5(2)4-6(3)7/h5-7H,4H2,1-3H3	InChI=1/C6H14O/c1-5(2)4-6(3)7/h5-7H,4H2,1-3H3	C6H14O	102.105	122.076	120.142	119.931	Lite	0	0	0	0	0	0	0	0	0	0
DTXCID505102	3-(Dimethylamino)propylamine	109-55-7	CN(C)CCCN	InChI=1S/C5H14N2/c1-7(2)5-3-4-6/h3-6H2,1-2H3	InChI=1S/C5H14N2/c1-7(2)5-3-4-6/h3-6H2,1-2H3	C5H14N2	102.116	118.549	118.103	117.819	Lite	0	0	0	0	0	0	0	0	0	0
DTXCID501006	N-Nitroso-N-methylurea	684-93-5	CN(N=O)C(N)=O	InChI=1S/C2H5N3O2/c1-5(4-7)2(3)6/h1H3,(H2,3,6)	InChI=1S/C2H5N3O2/c1-5(4-7)2(3)6/h1H3,(H2,3,6)	C2H5N3O2	103.038	112.955	112.556	112.338	Lite	0	0	0	0	0	0	0	0	0	0
DTXCID606783	Imidodicarbonic diamide	108-19-0	NC(=O)NC(N)=O	InChI=1S/C2H5N3O2/c3-1(6)5-2(4)7/h(H5,3,4,5,6,7)	InChI=1S/C2H5N3O2/c3-1(6)5-2(4)7/h(H5,3,4,5,6,7)	C2H5N3O2	103.038	114.009	113.041	113.16	Lite	0	0	0	0	0	0	0	0	0	0
DTXCID001491	Benzonitrile	100-47-0	N#CC1=CC=CC=C1	InChI=1S/C7H5N/c8-6-7-4-2-1-3-5-7/h1-5H	InChI=1S/C7H5N/c8-6-7-4-2-1-3-5-7/h1-5H	C7H5N	103.042			116.254	Lite	0	0	0	0	0	0	0	0	0	0
DTXCID30119139	Ethyl glycinate hydrochloride	623-33-6	Cl.CCOC(=O)CN	InChI=1S/C4H9NO2.ClH/c1-2-7-4(6)3-5;/h2-3,5H2,1H3;1H	InChI=1S/C4H9NO2/c1-2-7-4(6)3-5/h2-3,5H2,1H3	C4H9NO2	103.063	117.107	116.305	115.903	Lite	0	0	0	0	0	0	0	0	0	0
DTXCID4024804	N-(2-Hydroxyethyl)acetamide	142-26-7	CC(=O)NCCO	InChI=1S/C4H9NO2/c1-4(7)5-2-3-6/h6H,2-3H2,1H3,(H,5,7)	InChI=1S/C4H9NO2/c1-4(7)5-2-3-6/h6H,2-3H2,1H3,(H,5,7)	C4H9NO2	103.063	116.309	115.569	115.781	Lite	0	0	0	0	0	0	0	0	0	0
DTXCID70750	Isobutyl nitrite	542-56-3	CC(C)CON=O	InChI=1S/C4H9NO2/c1-4(2)3-7-5-6/h4H,3H2,1-2H3	InChI=1S/C4H9NO2/c1-4(2)3-7-5-6/h4H,3H2,1-2H3	C4H9NO2	103.063	118.07	117.881	117.769	Lite	0	0	0	0	0	0	0	0	0	0
DTXCID005050	Diethylenetriamine	111-40-0	NCCNCCN	InChI=1S/C4H13N3/c5-1-3-7-4-2-6/h7H,1-6H2	InChI=1S/C4H13N3/c5-1-3-7-4-2-6/h7H,1-6H2	C4H13N3	103.111	121.263	120.329	120.138	Lite	0	0	0	0	0	0	0	0	0	0
DTXCID507528	3-(Methylthio)propanal	3268-49-3	CSCCC=O	InChI=1S/C4H8OS/c1-6-4-2-3-5/h3H,2,4H2,1H3	InChI=1S/C4H8OS/c1-6-4-2-3-5/h3H,2,4H2,1H3	C4H8OS	104.03	115.005	113.582	113.421	Lite	0	0	0	0	0	0	0	0	0	0
DTXCID101843	2-Pyridinecarbonitrile	100-70-9	N#CC1=NC=CC=C1	InChI=1S/C6H4N2/c7-5-6-3-1-2-4-8-6/h1-4H	InChI=1S/C6H4N2/c7-5-6-3-1-2-4-8-6/h1-4H	C6H4N2	104.037	116.365	115.992	115.692	Lite	0	0	0	0	0	0	0	0	0	0
DTXCID606665	3-Pyridinecarbonitrile	100-54-9	N#CC1=CN=CC=C1	InChI=1S/C6H4N2/c7-4-6-2-1-3-8-5-6/h1-3,5H	InChI=1S/C6H4N2/c7-4-6-2-1-3-8-5-6/h1-3,5H	C6H4N2	104.037	116.675	116.047	115.547	Lite	0	0	0	0	0	0	0	0	0	0
DTXCID7021528	4-Pyridinecarbonitrile	100-48-1	N#CC1=CC=NC=C1	InChI=1S/C6H4N2/c7-5-6-1-3-8-4-2-6/h1-4H	InChI=1S/C6H4N2/c7-5-6-1-3-8-4-2-6/h1-4H	C6H4N2	104.037	116.68	116.08	115.479	Lite	0	0	0	0	0	0	0	0	0	0
DTXCID0022191	N,N'-Dimethylthiourea	534-13-4	CNC(=S)NC	InChI=1S/C3H8N2S/c1-4-3(6)5-2/h1-2H3,(H2,4,5,6)	InChI=1S/C3H8N2S/c1-4-3(6)5-2/h1-2H3,(H2,4,5,6)	C3H8N2S	104.041	114.687	114.064	113.765	Lite	0	0	0	0	1	0	0	0	0	0
DTXCID5011294	Ethoxyacetic acid	627-03-2	CCOCC(O)=O	InChI=1S/C4H8O3/c1-2-7-3-4(5)6/h2-3H2,1H3,(H,5,6)	InChI=1S/C4H8O3/c1-2-7-3-4(5)6/h2-3H2,1H3,(H,5,6)	C4H8O3	104.047	116.316	115.867	115.514	Lite	0	0	0	0	0	0	0	0	0	0
DTXCID0021256	1,5-Pentanediol	111-29-5	OCCCCCO	InChI=1S/C5H12O2/c6-4-2-1-3-5-7/h6-7H,1-5H2	InChI=1S/C5H12O2/c6-4-2-1-3-5-7/h6-7H,1-5H2	C5H12O2	104.084	121.33	119.372	120.162	Lite	0	0	0	0	0	0	0	0	0	0
DTXCID007036	2,2-Dimethylpropane-1,3-diol	126-30-7	CC(C)(CO)CO	InChI=1S/C5H12O2/c1-5(2,3-6)4-7/h6-7H,3-4H2,1-2H3	InChI=1S/C5H12O2/c1-5(2,3-6)4-7/h6-7H,3-4H2,1-2H3	C5H12O2	104.084	117.012	116.214	116.239	Lite	0	0	0	0	0	0	0	0	0	0
DTXCID2027466	2-Isopropoxyethanol	109-59-1	CC(C)OCCO	InChI=1S/C5H12O2/c1-5(2)7-4-3-6/h5-6H,3-4H2,1-2H3	InChI=1S/C5H12O2/c1-5(2)7-4-3-6/h5-6H,3-4H2,1-2H3	C5H12O2	104.084	117.374	116.92	116.975	Lite	0	0	0	0	0	0	0	0	0	0
DTXCID404283	1-Ethoxy-2-propanol	1569-02-4	CCOCC(C)O	InChI=1/C5H12O2/c1-3-7-4-5(2)6/h5-6H,3-4H2,1-2H3	InChI=1/C5H12O2/c1-3-7-4-5(2)6/h5-6H,3-4H2,1-2H3	C5H12O2	104.084	119.286	118.791	118.77	Lite	0	0	0	0	0	0	0	0	0	0
DTXCID5024897	2-Ethylpropane-1,3-diol	2612-29-5	CCC(CO)CO	InChI=1S/C5H12O2/c1-2-5(3-6)4-7/h5-7H,2-4H2,1H3	InChI=1S/C5H12O2/c1-2-5(3-6)4-7/h5-7H,2-4H2,1H3	C5H12O2	104.084	119.247	118.161	118.432	Lite	0	0	0	0	0	0	0	0	0	0
DTXCID707500	2-Propoxyethanol	2807-30-9	CCCOCCO	InChI=1S/C5H12O2/c1-2-4-7-5-3-6/h6H,2-5H2,1H3	InChI=1S/C5H12O2/c1-2-4-7-5-3-6/h6H,2-5H2,1H3	C5H12O2	104.084	117.36	117.62	117.428	Lite	0	0	0	0	0	0	0	0	0	0
DTXCID8024812	3-Methoxybutan-1-ol	2517-43-3	COC(C)CCO	InChI=1/C5H12O2/c1-5(7-2)3-4-6/h5-6H,3-4H2,1-2H3	InChI=1/C5H12O2/c1-5(7-2)3-4-6/h5-6H,3-4H2,1-2H3	C5H12O2	104.084	118.261	117.302	117.734	Lite	0	0	0	0	0	0	0	0	0	0
DTXCID8030681	Diethoxymethane	462-95-3	CCOCOCC	InChI=1S/C5H12O2/c1-3-6-5-7-4-2/h3-5H2,1-2H3	InChI=1S/C5H12O2/c1-3-6-5-7-4-2/h3-5H2,1-2H3	C5H12O2	104.084	120.564	119.947	119.828	Lite	0	0	0	0	0	0	0	0	0	0
DTXCID5021914	2,2'-Oxybis(ethylamine)	2752-17-2	NCCOCCN	InChI=1S/C4H12N2O/c5-1-3-7-4-2-6/h1-6H2	InChI=1S/C4H12N2O/c5-1-3-7-4-2-6/h1-6H2	C4H12N2O	104.095	118.391	117.973	117.621	Lite	0	0	0	0	0	0	0	0	0	0
DTXCID601550	Cyanogen bromide	506-68-3	BrC#N	InChI=1S/CBrN/c2-1-3	InChI=1S/CBrN/c2-1-3	CBrN	104.921				NA	0	0	0	0	0	0	0	0	0	0
DTXCID5024390	N-Methylhydrazinecarbothioamide	6610-29-3	CNC(=S)NN	InChI=1S/C2H7N3S/c1-4-2(6)5-3/h3H2,1H3,(H2,4,5,6)	InChI=1S/C2H7N3S/c1-4-2(6)5-3/h3H2,1H3,(H2,4,5,6)	C2H7N3S	105.036	114.486	113.516	113.187	Lite	0	0	0	0	0	0	0	0	0	0
DTXCID4030047	4-Vinylpyridine	100-43-6	C=CC1=CC=NC=C1	InChI=1S/C7H7N/c1-2-7-3-5-8-6-4-7/h2-6H,1H2	InChI=1S/C7H7N/c1-2-7-3-5-8-6-4-7/h2-6H,1H2	C7H7N	105.058	117.578	143.339	116.459	Standard	0	0	0	0	0	0	0	0	0	0
DTXCID601932	Diethanolamine	111-42-2	OCCNCCO	InChI=1S/C4H11NO2/c6-3-1-5-2-4-7/h5-7H,1-4H2	InChI=1S/C4H11NO2/c6-3-1-5-2-4-7/h5-7H,1-4H2	C4H11NO2	105.079	115.876	115.432	115.677	Lite	0	0	0	0	0	0	0	0	0	0
DTXCID907341	2-(2-Aminoethoxy)ethanol	929-06-6	NCCOCCO	InChI=1S/C4H11NO2/c5-1-3-7-4-2-6/h6H,1-5H2	InChI=1S/C4H11NO2/c5-1-3-7-4-2-6/h6H,1-5H2	C4H11NO2	105.079	118.514	117.425	117.176	Lite	0	0	0	0	0	0	0	0	0	0
DTXCID4030205	Germanium dioxide	1310-53-8	O=[Ge]=O	InChI=1S/GeO2/c2-1-3_x000D_	InChI=1S/GeO2/c2-1-3	GeO2	105.911				NA	0	0	0	0	0	0	0	0	0	0
DTXCID4030122	2-Chloroethyl vinyl ether	110-75-8	ClCCOC=C	InChI=1S/C4H7ClO/c1-2-6-4-3-5/h2H,1,3-4H2	InChI=1S/C4H7ClO/c1-2-6-4-3-5/h2H,1,3-4H2	C4H7ClO	106.019	108.113	107.165	106.762	Lite	0	0	0	0	0	0	0	0	0	0
DTXCID7031115	2-Methylpropanoyl chloride	79-30-1	CC(C)C(Cl)=O	InChI=1S/C4H7ClO/c1-3(2)4(5)6/h3H,1-2H3	InChI=1S/C4H7ClO/c1-3(2)4(5)6/h3H,1-2H3	C4H7ClO	106.019	107.071	106.79	106.47	Lite	0	0	0	0	0	0	0	0	0	0
DTXCID707461	Thiocarbazide	2231-57-4	NNC(=S)NN	InChI=1S/CH6N4S/c2-4-1(6)5-3/h2-3H2,(H2,4,5,6)	InChI=1S/CH6N4S/c2-4-1(6)5-3/h2-3H2,(H2,4,5,6)	CH6N4S	106.031	112.343	117.203	117.239	Lite	0	0	0	0	0	0	0	0	0	0
DTXCID20462	Diethylene glycol	111-46-6	OCCOCCO	InChI=1S/C4H10O3/c5-1-3-7-4-2-6/h5-6H,1-4H2	InChI=1S/C4H10O3/c5-1-3-7-4-2-6/h5-6H,1-4H2	C4H10O3	106.063	117.631	116.454	116.737	Lite	0	0	0	0	0	0	0	0	0	0
DTXCID6024416	1,2,4-Butanetriol	3068-00-6	OCCC(O)CO	InChI=1/C4H10O3/c5-2-1-4(7)3-6/h4-7H,1-3H2	InChI=1/C4H10O3/c5-2-1-4(7)3-6/h4-7H,1-3H2	C4H10O3	106.063	118.166	117.529	117.49	Lite	0	0	0	0	0	0	0	0	0	0
DTXCID501446	m-Xylene	108-38-3	CC1=CC(C)=CC=C1	InChI=1S/C8H10/c1-7-4-3-5-8(2)6-7/h3-6H,1-2H3	InChI=1S/C8H10/c1-7-4-3-5-8(2)6-7/h3-6H,1-2H3	C8H10	106.078			119.659	Lite	0	0	0	0	0	0	0	0	0	0
DTXCID501807	ortho-Xylene	95-47-6	CC1=C(C)C=CC=C1	InChI=1S/C8H10/c1-7-5-3-4-6-8(7)2/h3-6H,1-2H3	InChI=1S/C8H10/c1-7-5-3-4-6-8(7)2/h3-6H,1-2H3	C8H10	106.078			118.266	Lite	0	0	0	0	0	0	0	0	0	0
DTXCID3023970, DTXCID3023970	Metam-sodium hydrate, Metam-sodium	6734-80-1, 137-42-8	O.O.O.[Na+].CNC([S-])=S	InChI=1S/C2H5NS2.Na.3H2O/c1-3-2(4)5;;;;/h1H3,(H2,3,4,5);;3*1H2/q;+1;;;/p-1	InChI=1S/C2H5NS2/c1-3-2(4)5/h1H3,(H2,3,4,5)	C2H5NS2	106.986	110.475	109.553	109.181	Lite	0	0	0	0	0	0	0	0	0	0
DTXCID30512	Dimethylcarbamoyl chloride	79-44-7	CN(C)C(Cl)=O	InChI=1S/C3H6ClNO/c1-5(2)3(4)6/h1-2H3	InChI=1S/C3H6ClNO/c1-5(2)3(4)6/h1-2H3	C3H6ClNO	107.014	106.519	106.026	105.779	Lite	0	0	0	0	0	0	0	0	0	0
DTXCID5033048	(2-Chloroethyl)dimethylamine hydrochloride	4584-46-7	Cl.CN(C)CCCl	InChI=1S/C4H10ClN.ClH/c1-6(2)4-3-5;/h3-4H2,1-2H3;1H	InChI=1S/C4H10ClN/c1-6(2)4-3-5/h3-4H2,1-2H3	C4H10ClN	107.05	109.061	108.379	107.941	Lite	0	0	0	0	0	0	0	0	0	0
DTXCID0030825	3,5-Dimethylpyridine	591-22-0	CC1=CC(C)=CN=C1	InChI=1S/C7H9N/c1-6-3-7(2)5-8-4-6/h3-5H,1-2H3	InChI=1S/C7H9N/c1-6-3-7(2)5-8-4-6/h3-5H,1-2H3	C7H9N	107.073	119.913	119.468	118.911	Lite	0	0	0	0	0	0	0	0	0	0
DTXCID1030109	2,6-Dimethylpyridine	108-48-5	CC1=CC=CC(C)=N1	InChI=1S/C7H9N/c1-6-4-3-5-7(2)8-6/h3-5H,1-2H3	InChI=1S/C7H9N/c1-6-4-3-5-7(2)8-6/h3-5H,1-2H3	C7H9N	107.073	119.86	119.323	118.879	Lite	0	0	0	0	0	0	0	0	0	0
DTXCID201839	Benzylamine	100-46-9	NCC1=CC=CC=C1	InChI=1S/C7H9N/c8-6-7-4-2-1-3-5-7/h1-5H,6,8H2	InChI=1S/C7H9N/c8-6-7-4-2-1-3-5-7/h1-5H,6,8H2	C7H9N	107.073	119.219	118.772	118.326	Lite	0	0	0	0	0	0	0	0	0	0
DTXCID206164, DTXCID206164	2-Methylaniline, 2-Methylaniline hydrochloride	95-53-4, 636-21-5	CC1=C(N)C=CC=C1	InChI=1S/C7H9N/c1-6-4-2-3-5-7(6)8/h2-5H,8H2,1H3	InChI=1S/C7H9N/c1-6-4-2-3-5-7(6)8/h2-5H,8H2,1H3	C7H9N	107.073	118.108	117.388	117.208	Lite	0	0	0	0	0	0	0	0	0	0
DTXCID506792	3-Methylaniline	108-44-1	CC1=CC(N)=CC=C1	InChI=1S/C7H9N/c1-6-3-2-4-7(8)5-6/h2-5H,8H2,1H3	InChI=1S/C7H9N/c1-6-3-2-4-7(8)5-6/h2-5H,8H2,1H3	C7H9N	107.073	119.494	118.534	118.375	Lite	0	0	0	0	0	0	0	0	0	0
DTXCID601872	4-Methylaniline	106-49-0	CC1=CC=C(N)C=C1	InChI=1S/C7H9N/c1-6-2-4-7(8)5-3-6/h2-5H,8H2,1H3	InChI=1S/C7H9N/c1-6-2-4-7(8)5-3-6/h2-5H,8H2,1H3	C7H9N	107.073	119.458	118.757	118.415	Lite	0	0	0	0	0	0	0	0	0	0
DTXCID0027018	Sodium ethenesulfonate	3039-83-6	[Na+].[O-]S(=O)(=O)C=C	InChI=1S/C2H4O3S.Na/c1-2-6(3,4)5;/h2H,1H2,(H,3,4,5);/q;+1/p-1	InChI=1S/C2H4O3S/c1-2-6(3,4)5/h2H,1H2,(H,3,4,5)	C2H4O3S	107.988			111.717	Lite	0	0	0	0	0	0	0	0	0	0
DTXCID7021576	Methyl chloroacetate	96-34-4	COC(=O)CCl	InChI=1S/C3H5ClO2/c1-6-3(5)2-4/h2H2,1H3_x000D_	InChI=1S/C3H5ClO2/c1-6-3(5)2-4/h2H2,1H3	C3H5ClO2	107.998	103.831	105.693	105.257	Lite	0	0	0	0	0	0	0	0	0	0
DTXCID40145	1,4-Benzoquinone	106-51-4	O=C1C=CC(=O)C=C1	InChI=1S/C6H4O2/c7-5-1-2-6(8)4-3-5/h1-4H	InChI=1S/C6H4O2/c7-5-1-2-6(8)4-3-5/h1-4H	C6H4O2	108.021	116.237	115.707	115.353	Lite	0	0	0	0	0	0	0	0	0	0
DTXCID101869	p-Cresol	106-44-5	CC1=CC=C(O)C=C1	InChI=1S/C7H8O/c1-6-2-4-7(8)5-3-6/h2-5,8H,1H3	InChI=1S/C7H8O/c1-6-2-4-7(8)5-3-6/h2-5,8H,1H3	C7H8O	108.058	118.859	118.302	118.038	Lite	0	0	0	0	0	0	0	0	0	0
DTXCID70152	Benzyl alcohol	100-51-6	OCC1=CC=CC=C1	InChI=1S/C7H8O/c8-6-7-4-2-1-3-5-7/h1-5,8H,6H2	InChI=1S/C7H8O/c8-6-7-4-2-1-3-5-7/h1-5,8H,6H2	C7H8O	108.058	118.725	117.977	117.978	Lite	0	0	0	0	0	0	0	0	0	0
DTXCID804200	m-Cresol	108-39-4	CC1=CC(O)=CC=C1	InChI=1S/C7H8O/c1-6-3-2-4-7(8)5-6/h2-5,8H,1H3	InChI=1S/C7H8O/c1-6-3-2-4-7(8)5-6/h2-5,8H,1H3	C7H8O	108.058	118.871	118.219	118.014	Lite	0	0	0	0	0	0	0	0	0	0
DTXCID901808	o-Cresol	95-48-7	CC1=C(O)C=CC=C1	InChI=1S/C7H8O/c1-6-4-2-3-5-7(6)8/h2-5,8H,1H3	InChI=1S/C7H8O/c1-6-4-2-3-5-7(6)8/h2-5,8H,1H3	C7H8O	108.058	117.903	117.366	117.141	Lite	0	0	0	0	0	0	0	0	0	0
DTXCID001137	1,3-Benzenediamine	108-45-2	NC1=CC(N)=CC=C1	InChI=1S/C6H8N2/c7-5-2-1-3-6(8)4-5/h1-4H,7-8H2	InChI=1S/C6H8N2/c7-5-2-1-3-6(8)4-5/h1-4H,7-8H2	C6H8N2	108.069	118.255	117.187	116.94	Lite	0	0	0	0	0	0	0	0	0	0
DTXCID0024424	3-(Aminomethyl)pyridine	3731-52-0	NCC1=CN=CC=C1	InChI=1S/C6H8N2/c7-4-6-2-1-3-8-5-6/h1-3,5H,4,7H2	InChI=1S/C6H8N2/c7-4-6-2-1-3-8-5-6/h1-3,5H,4,7H2	C6H8N2	108.069	118.631	118.095	117.807	Lite	0	0	0	0	0	0	0	0	0	0
DTXCID201936	Hexanedinitrile	111-69-3	N#CCCCCC#N	InChI=1S/C6H8N2/c7-5-3-1-2-4-6-8/h1-4H2	InChI=1S/C6H8N2/c7-5-3-1-2-4-6-8/h1-4H2	C6H8N2	108.069			124.097	Lite	0	0	0	0	0	0	0	0	0	0
DTXCID301147, DTXCID301147	Phenylhydrazine hydrochloride, Phenylhydrazine	59-88-1, 100-63-0	Cl.NNC1=CC=CC=C1	InChI=1S/C6H8N2.ClH/c7-8-6-4-2-1-3-5-6;/h1-5,8H,7H2;1H	InChI=1S/C6H8N2/c7-8-6-4-2-1-3-5-6/h1-5,8H,7H2	C6H8N2	108.069	117.78	117.295	116.948	Lite	0	0	0	0	0	0	0	0	0	0
DTXCID401138, DTXCID401138	1,4-Benzenediamine dihydrochloride, 1,4-Benzenediamine	624-18-0, 106-50-3	Cl.Cl.NC1=CC=C(N)C=C1	InChI=1S/C6H8N2.2ClH/c7-5-1-2-6(8)4-3-5;;/h1-4H,7-8H2;2*1H	InChI=1S/C6H8N2/c7-5-1-2-6(8)4-3-5/h1-4H,7-8H2	C6H8N2	108.069	117.932	117.428	116.837	Lite	0	0	0	0	0	0	0	0	0	0
DTXCID8024860	6-Methylpyridin-2-amine	1824-81-3	CC1=NC(N)=CC=C1	InChI=1S/C6H8N2/c1-5-3-2-4-6(7)8-5/h2-4H,1H3,(H2,7,8)	InChI=1S/C6H8N2/c1-5-3-2-4-6(7)8-5/h2-4H,1H3,(H2,7,8)	C6H8N2	108.069	118.518	117.903	117.741	Lite	0	0	0	0	0	0	0	0	0	0
DTXCID805612	2-Methylpentanedinitrile	4553-62-2	CC(CCC#N)C#N	InChI=1/C6H8N2/c1-6(5-8)3-2-4-7/h6H,2-3H2,1H3	InChI=1/C6H8N2/c1-6(5-8)3-2-4-7/h6H,2-3H2,1H3	C6H8N2	108.069			118.808	Lite	0	0	0	0	0	1	0	0	0	0
DTXCID9024720	4-Methylpyridin-2-amine	695-34-1	CC1=CC=NC(N)=C1	InChI=1S/C6H8N2/c1-5-2-3-8-6(7)4-5/h2-4H,1H3,(H2,7,8)	InChI=1S/C6H8N2/c1-5-2-3-8-6(7)4-5/h2-4H,1H3,(H2,7,8)	C6H8N2	108.069	117.24	118.114	117.515	Lite	0	0	0	0	0	0	0	0	0	0
DTXCID905881	1,2-Phenylenediamine	95-54-5	NC1=C(N)C=CC=C1	InChI=1S/C6H8N2/c7-5-3-1-2-4-6(5)8/h1-4H,7-8H2	InChI=1S/C6H8N2/c7-5-3-1-2-4-6(5)8/h1-4H,7-8H2	C6H8N2	108.069	116.892	116.281	116.182	Lite	0	0	0	0	0	0	0	0	0	0
DTXCID503367	Nicotinyl alcohol	100-55-0	OCC1=CC=CN=C1	InChI=1S/C6H7NO/c8-5-6-2-1-3-7-4-6/h1-4,8H,5H2	InChI=1S/C6H7NO/c8-5-6-2-1-3-7-4-6/h1-4,8H,5H2	C6H7NO	109.053	117.884	117.477	117.225	Lite	0	0	0	0	0	0	0	0	0	0
DTXCID8027084	2-Acetylpyrrole	1072-83-9	CC(=O)C1=CC=CN1	InChI=1S/C6H7NO/c1-5(8)6-3-2-4-7-6/h2-4,7H,1H3	InChI=1S/C6H7NO/c1-5(8)6-3-2-4-7-6/h2-4,7H,1H3	C6H7NO	109.053	118.553	118.014	117.63	Lite	0	0	0	0	0	0	0	0	0	0
DTXCID8030132	6-Methyl-3-hydroxypyridine	1121-78-4	CC1=NC=C(O)C=C1	InChI=1S/C6H7NO/c1-5-2-3-6(8)4-7-5/h2-4,8H,1H3	InChI=1S/C6H7NO/c1-5-2-3-6(8)4-7-5/h2-4,8H,1H3	C6H7NO	109.053	118.348	117.843	117.441	Lite	0	0	0	0	0	0	0	0	0	0
DTXCID8020127	2,6-Diaminopyridine	141-86-6	NC1=CC=CC(N)=N1	InChI=1S/C5H7N3/c6-4-2-1-3-5(7)8-4/h1-3H,(H4,6,7,8)	InChI=1S/C5H7N3/c6-4-2-1-3-5(7)8-4/h1-3H,(H4,6,7,8)	C5H7N3	109.064	115.999	116.493	116.226	Lite	0	0	0	0	0	0	0	0	0	0
DTXCID9030676	2,3-Diaminopyridine	452-58-4	NC1=CC=CN=C1N	InChI=1S/C5H7N3/c6-4-2-1-3-8-5(4)7/h1-3H,6H2,(H2,7,8)	InChI=1S/C5H7N3/c6-4-2-1-3-8-5(4)7/h1-3H,6H2,(H2,7,8)	C5H7N3	109.064	115.975	115.663	115.143	Lite	0	0	0	0	0	0	0	0	0	0
DTXCID605012	2,3-Dichloro-1-propene	78-88-6	ClCC(Cl)=C	InChI=1S/C3H4Cl2/c1-3(5)2-4/h1-2H2	InChI=1S/C3H4Cl2/c1-3(5)2-4/h1-2H2	C3H4Cl2	109.969			94.9317	Lite	0	0	0	0	0	0	0	0	0	0
DTXCID9012305	(Z)-Dichloropropene	10061-01-5	ClC\C=C/Cl	InChI=1S/C3H4Cl2/c4-2-1-3-5/h1-2H,3H2/b2-1-	InChI=1S/C3H4Cl2/c4-2-1-3-5/h1-2H,3H2/b2-1-	C3H4Cl2	109.969			95.0371	Lite	0	0	0	0	0	0	0	0	0	0
DTXCID907401	4-Thiazolecarbonitrile	1452-15-9	N#CC1=CSC=N1	InChI=1S/C4H2N2S/c5-1-4-2-7-3-6-4/h2-3H	InChI=1S/C4H2N2S/c5-1-4-2-7-3-6-4/h2-3H	C4H2N2S	109.994	110.67	110.201	110.026	Lite	0	0	0	0	0	0	0	0	0	0
DTXCID10845	Methyl methanesulfonate	66-27-3	COS(C)(=O)=O	InChI=1S/C2H6O3S/c1-5-6(2,3)4/h1-2H3	InChI=1S/C2H6O3S/c1-5-6(2,3)4/h1-2H3	C2H6O3S	110.004	113.217	112.226	112.101	Lite	0	0	0	0	0	0	0	0	0	0
DTXCID10493	Dimethyl hydrogen phosphite	868-85-9	COP(=O)OC	InChI=1S/C2H7O3P/c1-4-6(3)5-2/h6H,1-2H3	InChI=1S/C2H7O3P/c1-4-6(3)5-2/h6H,1-2H3	C2H7O3P	110.013	112.946	113.159	112.441	Lite	0	0	0	0	0	0	0	0	0	0
DTXCID00664	3-Chloro-1,2-propanediol	96-24-2	OCC(O)CCl	InChI=1/C3H7ClO2/c4-1-3(6)2-5/h3,5-6H,1-2H2	InChI=1/C3H7ClO2/c4-1-3(6)2-5/h3,5-6H,1-2H2	C3H7ClO2	110.013	107.597	106.824	106.71	Lite	0	0	0	0	0	0	0	0	0	0
DTXCID906811, DTXCID906811	Sodium benzenethiolate, Benzenethiol	930-69-8, 108-98-5	[Na+].[S-]C1=CC=CC=C1	InChI=1S/C6H6S.Na/c7-6-4-2-1-3-5-6;/h1-5,7H;/q;+1/p-1	InChI=1S/C6H6S/c7-6-4-2-1-3-5-6/h1-5,7H	C6H6S	110.019			113.265	Lite	0	0	0	0	0	0	0	0	0	0
DTXCID30257	Catechol	120-80-9	OC1=C(O)C=CC=C1	InChI=1S/C6H6O2/c7-5-3-1-2-4-6(5)8/h1-4,7-8H	InChI=1S/C6H6O2/c7-5-3-1-2-4-6(5)8/h1-4,7-8H	C6H6O2	110.037	117.679	115.695	115.798	Lite	0	0	0	0	0	0	0	0	0	0
DTXCID601238	Resorcinol	108-46-3	OC1=CC(O)=CC=C1	InChI=1S/C6H6O2/c7-5-2-1-3-6(8)4-5/h1-4,7-8H	InChI=1S/C6H6O2/c7-5-2-1-3-6(8)4-5/h1-4,7-8H	C6H6O2	110.037	117.546	116.886	116.473	Lite	0	0	0	0	0	0	0	0	0	0
DTXCID70716	Hydroquinone	123-31-9	OC1=CC=C(O)C=C1	InChI=1S/C6H6O2/c7-5-1-2-6(8)4-3-5/h1-4,7-8H	InChI=1S/C6H6O2/c7-5-1-2-6(8)4-3-5/h1-4,7-8H	C6H6O2	110.037	120.008	117.125	116.396	Lite	0	0	0	0	0	0	0	0	0	0
DTXCID6015186	3-Methyl-2-cyclohexen-1-one	1193-18-6	CC1=CC(=O)CCC1	InChI=1S/C7H10O/c1-6-3-2-4-7(8)5-6/h5H,2-4H2,1H3	InChI=1S/C7H10O/c1-6-3-2-4-7(8)5-6/h5H,2-4H2,1H3	C7H10O	110.073	120.603	119.996	119.612	Lite	0	0	0	0	0	0	0	0	0	0
DTXCID7024744	2-Ethyl-4-methyl-1H-imidazole	931-36-2	CCC1=NC(C)=CN1	InChI=1S/C6H10N2/c1-3-6-7-4-5(2)8-6/h4H,3H2,1-2H3,(H,7,8)	InChI=1S/C6H10N2/c1-3-6-7-4-5(2)8-6/h4H,3H2,1-2H3,(H,7,8)	C6H10N2	110.084	121.663	121.107	120.833	Lite	0	0	0	0	0	0	0	0	0	0
DTXCID20134134	6-Hydroxy-2-oxopyridinium chloride	10357-84-3	Cl.OC1=CC=CC(O)=N1	InChI=1S/C5H5NO2.ClH/c7-4-2-1-3-5(8)6-4;/h1-3H,(H2,6,7,8);1H_x000D_	InChI=1S/C5H5NO2/c7-4-2-1-3-5(8)6-4/h1-3H,(H2,6,7,8)	C5H5NO2	111.032	116.844	116.437	115.884	Lite	0	0	0	0	0	0	0	0	0	0
DTXCID90196623	2,4-Dihydroxypyridine	626-03-9	OC1=CC(O)=NC=C1	InChI=1S/C5H5NO2/c7-4-1-2-6-5(8)3-4/h1-3H,(H2,6,7,8)_x000D_	InChI=1S/C5H5NO2/c7-4-1-2-6-5(8)3-4/h1-3H,(H2,6,7,8)	C5H5NO2	111.032	116.775	116.301	115.875	Lite	0	0	0	0	0	0	0	0	0	0
DTXCID9030337	3-Hydroxy-2-pyridone	16867-04-2	OC1=CC=CNC1=O	InChI=1S/C5H5NO2/c7-4-2-1-3-6-5(4)8/h1-3,7H,(H,6,8)	InChI=1S/C5H5NO2/c7-4-2-1-3-6-5(4)8/h1-3,7H,(H,6,8)	C5H5NO2	111.032	115.686	115.179	114.86	Lite	0	0	0	0	0	0	0	0	0	0
DTXCID2024456	Cytosine	71-30-7	NC1=NC(=O)NC=C1	InChI=1S/C4H5N3O/c5-3-1-2-6-4(8)7-3/h1-2H,(H3,5,6,7,8)	InChI=1S/C4H5N3O/c5-3-1-2-6-4(8)7-3/h1-2H,(H3,5,6,7,8)	C4H5N3O	111.043	114.983	141.606	115.432	Standard	0	0	0	0	0	0	0	0	0	0
DTXCID101440	N-Vinyl-2-pyrrolidone	88-12-0	C=CN1CCCC1=O	InChI=1S/C6H9NO/c1-2-7-5-3-4-6(7)8/h2H,1,3-5H2	InChI=1S/C6H9NO/c1-2-7-5-3-4-6(7)8/h2H,1,3-5H2	C6H9NO	111.068	119.314	118.994	118.592	Lite	0	0	0	0	0	0	0	0	0	0
DTXCID7027960	Sodium methyl sulfate	512-42-5	[Na+].COS([O-])(=O)=O	InChI=1S/CH4O4S.Na/c1-5-6(2,3)4;/h1H3,(H,2,3,4);/q;+1/p-1	InChI=1S/CH4O4S/c1-5-6(2,3)4/h1H3,(H,2,3,4)	CH4O4S	111.983			110.423	Lite	0	0	0	0	0	0	0	0	0	0
DTXCID5010060	2,2-Dichloropropane	594-20-7	CC(C)(Cl)Cl	InChI=1S/C3H6Cl2/c1-3(2,4)5/h1-2H3	InChI=1S/C3H6Cl2/c1-3(2,4)5/h1-2H3	C3H6Cl2	111.985				NA	0	0	0	0	0	0	0	0	0	0
DTXCID802004	1,3-Dichloropropane	142-28-9	ClCCCCl	InChI=1S/C3H6Cl2/c4-2-1-3-5/h1-3H2	InChI=1S/C3H6Cl2/c4-2-1-3-5/h1-3H2	C3H6Cl2	111.985			96.7597	Lite	0	0	0	0	0	0	0	0	0	0
DTXCID4031229	Thiophene-2-carbaldehyde	98-03-3	O=CC1=CC=CS1	InChI=1S/C5H4OS/c6-4-5-2-1-3-7-5/h1-4H_x000D_	InChI=1S/C5H4OS/c6-4-5-2-1-3-7-5/h1-4H	C5H4OS	111.998	111.605	111.133	110.551	Lite	0	0	0	0	0	0	0	0	0	0
DTXCID4021420	2-Furancarboxylic acid	88-14-2	OC(=O)C1=CC=CO1	InChI=1S/C5H4O3/c6-5(7)4-2-1-3-8-4/h1-3H,(H,6,7)	InChI=1S/C5H4O3/c6-5(7)4-2-1-3-8-4/h1-3H,(H,6,7)	C5H4O3	112.016	115.267	115.141	115.145	Lite	0	0	0	0	0	0	0	0	0	0
DTXCID10792	Maleic hydrazide	123-33-1	O=C1NNC(=O)C=C1	InChI=1S/C4H4N2O2/c7-3-1-2-4(8)6-5-3/h1-2H,(H,5,7)(H,6,8)	InChI=1S/C4H4N2O2/c7-3-1-2-4(8)6-5-3/h1-2H,(H,5,7)(H,6,8)	C4H4N2O2	112.027	116.433	116.111	115.186	Lite	0	0	0	0	0	0	0	0	0	0
NoDTXCID16	Potassium hexa-2,4-dienoate	None	[K+].CC=CC=CC([O-])=O	InChI=1S/C6H8O2.K/c1-2-3-4-5-6(7)8;/h2-5H,1H3,(H,7,8);/q;+1/p-1_x000D_	InChI=1S/C6H8O2/c1-2-3-4-5-6(7)8/h2-5H,1H3,(H,7,8)	C6H8O2	112.052			125.912	Lite	0	0	0	0	0	0	0	0	0	0
DTXCID2027709	3-Methyl-1,2-cyclopentanedione	765-70-8	CC1CCC(=O)C1=O	InChI=1/C6H8O2/c1-4-2-3-5(7)6(4)8/h4H,2-3H2,1H3	InChI=1/C6H8O2/c1-4-2-3-5(7)6(4)8/h4H,2-3H2,1H3	C6H8O2	112.052	119.227	118.847	118.484	Lite	0	1	0	0	0	0	0	0	0	1
DTXCID401277, DTXCID401277, DTXCID401277	Calcium sorbate, Potassium sorbate, Sorbic acid	7492-55-9, 24634-61-5, 110-44-1	[Ca++].C\C=C\C=C\C([O-])=O.C\C=C\C=C\C([O-])=O	InChI=1S/2C6H8O2.Ca/c2*1-2-3-4-5-6(7)8;/h2*2-5H,1H3,(H,7,8);/q;;+2/p-2/b2*3-2+,5-4+;_x000D_	InChI=1S/C6H8O2/c1-2-3-4-5-6(7)8/h2-5H,1H3,(H,7,8)/b3-2+,5-4?	C6H8O2	112.052			125.824	Lite	0	0	0	0	0	0	0	0	0	0
DTXCID9024433	1,3-Cyclohexanedione	504-02-9	O=C1CCCC(=O)C1	InChI=1S/C6H8O2/c7-5-2-1-3-6(8)4-5/h1-4H2	InChI=1S/C6H8O2/c7-5-2-1-3-6(8)4-5/h1-4H2	C6H8O2	112.052	118.112	117.985	117.831	Lite	1	0	0	0	1	0	1	0	0	1
DTXCID1030816	2-Methylcyclohexanone	583-60-8	CC1CCCCC1=O	InChI=1S/C7H12O/c1-6-4-2-3-5-7(6)8/h6H,2-5H2,1H3_x000D_	InChI=1/C7H12O/c1-6-4-2-3-5-7(6)8/h6H,2-5H2,1H3	C7H12O	112.089	119.678	119.85	119.435	Lite	0	0	0	0	0	0	0	0	0	0
DTXCID8024600	Cyclohex-3-en-1-ylmethanol	1679-51-2	OCC1CCC=CC1	InChI=1/C7H12O/c8-6-7-4-2-1-3-5-7/h1-2,7-8H,3-6H2	InChI=1/C7H12O/c8-6-7-4-2-1-3-5-7/h1-2,7-8H,3-6H2	C7H12O	112.089	120.052	119.403	119.348	Lite	0	0	0	0	0	0	0	0	0	0
DTXCID207759	2-Amino-2,3-dimethylbutanenitrile	13893-53-3	CC(C)C(C)(N)C#N	InChI=1/C6H12N2/c1-5(2)6(3,8)4-7/h5H,8H2,1-3H3	InChI=1/C6H12N2/c1-5(2)6(3,8)4-7/h5H,8H2,1-3H3	C6H12N2	112.1	122.601	122.524	122.27	Lite	0	0	0	0	0	0	0	0	0	0
DTXCID902016	1,4-Diazabicyclo[2.2.2]octane	280-57-9	C1CN2CCN1CC2	InChI=1S/C6H12N2/c1-2-8-5-3-7(1)4-6-8/h1-6H2	InChI=1S/C6H12N2/c1-2-8-5-3-7(1)4-6-8/h1-6H2	C6H12N2	112.1	115.501	115.081	114.804	Lite	0	0	0	0	0	0	0	0	0	0
DTXCID0030324	2-Ethyl-1-hexene	1632-16-2	CCCCC(=C)CC	InChI=1S/C8H16/c1-4-6-7-8(3)5-2/h3-7H2,1-2H3_x000D_	InChI=1S/C8H16/c1-4-6-7-8(3)5-2/h3-7H2,1-2H3	C8H16	112.125				NA	0	0	0	0	0	0	0	0	0	0
DTXCID4030334	Ethylcyclohexane	1678-91-7	CCC1CCCCC1	InChI=1S/C8H16/c1-2-8-6-4-3-5-7-8/h8H,2-7H2,1H3	InChI=1S/C8H16/c1-2-8-6-4-3-5-7-8/h8H,2-7H2,1H3	C8H16	112.125				NA	0	0	0	0	0	0	0	0	0	0
DTXCID304810	2-Chloropyridine	109-09-1	ClC1=NC=CC=C1	InChI=1S/C5H4ClN/c6-5-3-1-2-4-7-5/h1-4H	InChI=1S/C5H4ClN/c6-5-3-1-2-4-7-5/h1-4H	C5H4ClN	113.003	106.037	105.313	104.91	Lite	0	0	0	0	0	0	0	0	0	0
DTXCID4030881	3-Chloropyridine	626-60-8	ClC1=CC=CN=C1	InChI=1S/C5H4ClN/c6-5-2-1-3-7-4-5/h1-4H	InChI=1S/C5H4ClN/c6-5-2-1-3-7-4-5/h1-4H	C5H4ClN	113.003	106.02	105.494	104.869	Lite	0	0	0	0	0	0	0	0	0	0
DTXCID00240	Caprolactam	105-60-2	O=C1CCCCCN1	InChI=1S/C6H11NO/c8-6-4-2-1-3-5-7-6/h1-5H2,(H,7,8)	InChI=1S/C6H11NO/c8-6-4-2-1-3-5-7-6/h1-5H2,(H,7,8)	C6H11NO	113.084	119.014	118.475	118.396	Lite	0	0	0	0	0	0	0	0	0	0
DTXCID1024413	1-Ethyl-2-pyrrolidinone	2687-91-4	CCN1CCCC1=O	InChI=1S/C6H11NO/c1-2-7-5-3-4-6(7)8/h2-5H2,1H3	InChI=1S/C6H11NO/c1-2-7-5-3-4-6(7)8/h2-5H2,1H3	C6H11NO	113.084	120.993	120.957	120.552	Lite	0	0	0	0	0	0	0	0	0	0
DTXCID6023941	N-Formylpiperidine	2591-86-8	O=CN1CCCCC1	InChI=1S/C6H11NO/c8-6-7-4-2-1-3-5-7/h6H,1-5H2	InChI=1S/C6H11NO/c8-6-7-4-2-1-3-5-7/h6H,1-5H2	C6H11NO	113.084	119.81	119.143	118.882	Lite	0	0	0	0	0	0	0	0	0	0
DTXCID6027133	2,4,5-Trimethyl-3-oxazoline	22694-96-8	CC1OC(C)C(C)=N1	InChI=1/C6H11NO/c1-4-5(2)8-6(3)7-4/h5-6H,1-3H3	InChI=1/C6H11NO/c1-4-5(2)8-6(3)7-4/h5-6H,1-3H3	C6H11NO	113.084	121.711	121.201	120.835	Lite	0	0	0	0	0	0	0	0	0	0
DTXCID70209124	Cyclohexanone oxime	100-64-1	ON=C1CCCCC1	InChI=1S/C6H11NO/c8-7-6-4-2-1-3-5-6/h8H,1-5H2	InChI=1S/C6H11NO/c8-7-6-4-2-1-3-5-6/h8H,1-5H2	C6H11NO	113.084	120.64	119.973	119.858	Lite	0	0	0	0	0	0	0	0	0	0
DTXCID3027118	2-Methyl-3-furanthiol	28588-74-1	CC1=C(S)C=CO1	InChI=1S/C5H6OS/c1-4-5(7)2-3-6-4/h2-3,7H,1H3	InChI=1/C5H6OS/c1-4-5(7)2-3-6-4/h2-4H,1H3	C5H6OS	114.014	115.07	114.705	114.323	Lite	0	0	0	0	0	0	0	0	0	0
DTXCID4031227	2-Furylmethanethiol	98-02-2	SCC1=CC=CO1	InChI=1S/C5H6OS/c7-4-5-2-1-3-6-5/h1-3,7H,4H2	InChI=1S/C5H6OS/c7-4-5-2-1-3-6-5/h1-3,7H,4H2	C5H6OS	114.014	114.615	114.663	113.978	Lite	0	0	0	0	0	0	0	0	0	0
DTXCID20820	Methimazole	60-56-0	CN1C=CNC1=S	InChI=1S/C4H6N2S/c1-6-3-2-5-4(6)7/h2-3H,1H3,(H,5,7)	InChI=1S/C4H6N2S/c1-6-3-2-5-4(6)7/h2-3H,1H3,(H,5,7)	C4H6N2S	114.025	115.034	114.34	113.94	Lite	0	0	0	0	0	0	0	0	0	0
DTXCID3024362	Glutaric anhydride	108-55-4	O=C1CCCC(=O)O1	InChI=1S/C5H6O3/c6-4-2-1-3-5(7)8-4/h1-3H2	InChI=1S/C5H6O3/c6-4-2-1-3-5(7)8-4/h1-3H2	C5H6O3	114.032	117.573	117.098	116.621	Lite	0	0	0	0	0	0	0	0	0	0
DTXCID7027417	4-Hydroxy-5-methyl-3-furanone	19322-27-1	CC1=C(O)C(=O)CO1	InChI=1S/C5H6O3/c1-3-5(7)4(6)2-8-3/h7H,2H2,1H3	InChI=1/C5H6O3/c1-3-5(7)4(6)2-8-3/h3H,2H2,1H3	C5H6O3	114.032	118.008	117.936	117.417	Lite	0	0	0	0	0	0	0	0	0	0
DTXCID0027066	2,3-Hexanedione	3848-24-6	CCCC(=O)C(C)=O	InChI=1S/C6H10O2/c1-3-4-6(8)5(2)7/h3-4H2,1-2H3	InChI=1S/C6H10O2/c1-3-4-6(8)5(2)7/h3-4H2,1-2H3	C6H10O2	114.068	124.34	123.75	122.987	Lite	0	0	0	0	0	0	0	0	0	0
DTXCID1024910	Hex-3-yne-2,5-diol	3031-66-1	CC(O)C#CC(C)O	InChI=1/C6H10O2/c1-5(7)3-4-6(2)8/h5-8H,1-2H3	InChI=1/C6H10O2/c1-5(7)3-4-6(2)8/h5-8H,1-2H3	C6H10O2	114.068	127.034	127.041	126.734	Lite	0	0	0	0	0	0	0	0	0	0
DTXCID1027681	3,4-Hexanedione	4437-51-8	CCC(=O)C(=O)CC	InChI=1S/C6H10O2/c1-3-5(7)6(8)4-2/h3-4H2,1-2H3	InChI=1S/C6H10O2/c1-3-5(7)6(8)4-2/h3-4H2,1-2H3	C6H10O2	114.068	124.008	124.353	124.442	Lite	0	0	0	0	0	0	0	0	0	0
DTXCID6021298	gamma-Caprolactone	695-06-7	CCC1CCC(=O)O1	InChI=1/C6H10O2/c1-2-5-3-4-6(7)8-5/h5H,2-4H2,1H3	InChI=1/C6H10O2/c1-2-5-3-4-6(7)8-5/h5H,2-4H2,1H3	C6H10O2	114.068	121.265	120.726	120.324	Lite	0	0	0	0	0	0	0	0	0	0
DTXCID1018771	2,4-Dimethylpentan-3-one	565-80-0	CC(C)C(=O)C(C)C	InChI=1S/C7H14O/c1-5(2)7(8)6(3)4/h5-6H,1-4H3	InChI=1S/C7H14O/c1-5(2)7(8)6(3)4/h5-6H,1-4H3	C7H14O	114.105	125.467	125.155	125.045	Lite	0	0	0	0	0	0	0	0	0	0
DTXCID601597	Heptanal	111-71-7	CCCCCCC=O	InChI=1S/C7H14O/c1-2-3-4-5-6-7-8/h7H,2-6H2,1H3	InChI=1S/C7H14O/c1-2-3-4-5-6-7-8/h7H,2-6H2,1H3	C7H14O	114.105	125.582	124.872	124.612	Lite	0	0	0	0	0	0	0	0	0	0
DTXCID601916	2-Heptanone	110-43-0	CCCCCC(C)=O	InChI=1S/C7H14O/c1-3-4-5-6-7(2)8/h3-6H2,1-2H3	InChI=1S/C7H14O/c1-3-4-5-6-7(2)8/h3-6H2,1-2H3	C7H14O	114.105	124.893	124.301	124.11	Lite	0	0	0	0	0	0	0	0	0	0
DTXCID801914	5-Methyl-2-hexanone	110-12-3	CC(C)CCC(C)=O	InChI=1S/C7H14O/c1-6(2)4-5-7(3)8/h6H,4-5H2,1-3H3	InChI=1S/C7H14O/c1-6(2)4-5-7(3)8/h6H,4-5H2,1-3H3	C7H14O	114.105	125.631	125.529	125.067	Lite	0	0	0	0	0	0	0	0	0	0
DTXCID707301	1,2-Cyclohexanediamine	694-83-7	NC1CCCCC1N	InChI=1/C6H14N2/c7-5-3-1-2-4-6(5)8/h5-6H,1-4,7-8H2	InChI=1/C6H14N2/c7-5-3-1-2-4-6(5)8/h5-6H,1-4,7-8H2	C6H14N2	114.116	120.593	119.61	119.569	Lite	0	0	0	0	0	0	0	0	0	0
DTXCID9030096	1,4-Dimethylpiperazine	106-58-1	CN1CCN(C)CC1	InChI=1S/C6H14N2/c1-7-3-5-8(2)6-4-7/h3-6H2,1-2H3	InChI=1S/C6H14N2/c1-7-3-5-8(2)6-4-7/h3-6H2,1-2H3	C6H14N2	114.116	121.564	121.829	121.483	Lite	0	0	0	0	0	0	0	0	0	0
DTXCID406882	Octane	111-65-9	CCCCCCCC	InChI=1S/C8H18/c1-3-5-7-8-6-4-2/h3-8H2,1-2H3	InChI=1S/C8H18/c1-3-5-7-8-6-4-2/h3-8H2,1-2H3	C8H18	114.141				NA	0	0	0	0	0	0	0	0	0	0
DTXCID0014259, DTXCID0014259	2-Methyl-4-isothiazolin-3-one hydrochloride, 2-Methyl-3(2H)-isothiazolone	26172-54-3, 2682-20-4	Cl.CN1SC=CC1=O	InChI=1S/C4H5NOS.ClH/c1-5-4(6)2-3-7-5;/h2-3H,1H3;1H	InChI=1S/C4H5NOS/c1-5-4(6)2-3-7-5/h2-3H,1H3	C4H5NOS	115.009	111.411	110.818	110.266	Lite	0	0	0	0	0	1	0	0	0	0
DTXCID5024427	4-Morpholinecarboxaldehyde	4394-85-8	O=CN1CCOCC1	InChI=1S/C5H9NO2/c7-5-6-1-3-8-4-2-6/h5H,1-4H2	InChI=1S/C5H9NO2/c7-5-6-1-3-8-4-2-6/h5H,1-4H2	C5H9NO2	115.063	118.462	118.013	117.781	Lite	0	0	0	0	0	0	0	0	0	0
DTXCID7020138	N-Methyl-3-oxobutyramide	20306-75-6	CNC(=O)CC(C)=O	InChI=1S/C5H9NO2/c1-4(7)3-5(8)6-2/h3H2,1-2H3,(H,6,8)_x000D_	InChI=1S/C5H9NO2/c1-4(7)3-5(8)6-2/h3H2,1-2H3,(H,6,8)	C5H9NO2	115.063	123.329	122.385	121.95	Lite	0	0	0	0	0	0	0	0	0	0
DTXCID002002	2,6-Dimethyl morpholine	141-91-3	CC1CNCC(C)O1	InChI=1/C6H13NO/c1-5-3-7-4-6(2)8-5/h5-7H,3-4H2,1-2H3	InChI=1/C6H13NO/c1-5-3-7-4-6(2)8-5/h5-7H,3-4H2,1-2H3	C6H13NO	115.1	120.944	120.683	120.323	Lite	0	0	0	0	0	0	0	0	0	0
DTXCID80209913	N-Hydroxy-4-methylpentan-2-imine	105-44-2	CC(C)CC(C)=NO	InChI=1S/C6H13NO/c1-5(2)4-6(3)7-8/h5,8H,4H2,1-3H3	InChI=1S/C6H13NO/c1-5(2)4-6(3)7-8/h5,8H,4H2,1-3H3	C6H13NO	115.1	126.27	125.738	125.249	Lite	0	0	0	0	0	0	0	0	0	0
DTXCID201517	Fumaric acid	110-17-8	OC(=O)\C=C\C(O)=O	InChI=1S/C4H4O4/c5-3(6)1-2-4(7)8/h1-2H,(H,5,6)(H,7,8)/b2-1+	InChI=1S/C4H4O4/c5-3(6)1-2-4(7)8/h1-2H,(H,5,6)(H,7,8)/b2-1+	C4H4O4	116.011			120.885	Lite	0	0	0	0	0	0	0	1	0	0
DTXCID601518	Maleic acid	110-16-7	OC(=O)\C=C/C(O)=O	InChI=1S/C4H4O4/c5-3(6)1-2-4(7)8/h1-2H,(H,5,6)(H,7,8)/b2-1-	InChI=1S/C4H4O4/c5-3(6)1-2-4(7)8/h1-2H,(H,5,6)(H,7,8)/b2-1-	C4H4O4	116.011			118.296	Lite	0	0	0	0	0	0	0	0	0	0
DTXCID3030216	1-N-Methyl-5-thiotetrazole	13183-79-4	CN1NN=NC1=S	InChI=1S/C2H4N4S/c1-6-2(7)3-4-5-6/h1H3,(H,3,5,7)	InChI=1S/C2H4N4S/c1-6-2(7)3-4-5-6/h1H3,(H,3,5,7)	C2H4N4S	116.016	114.297	113.567	112.837	Lite	0	0	0	0	0	0	0	0	0	0
DTXCID5024849	5-Amino-1,2-dihydro-3H-1,2,4-triazole-3-thione	16691-43-3	NC1=NC(=S)NN1	InChI=1S/C2H4N4S/c3-1-4-2(7)6-5-1/h(H4,3,4,5,6,7)	InChI=1S/C2H4N4S/c3-1-4-2(7)6-5-1/h(H4,3,4,5,6,7)	C2H4N4S	116.016	113.117	113.928	113.096	Lite	0	0	0	0	0	0	0	0	0	0
DTXCID104553	Azodicarbonamide	123-77-3	NC(=O)N=NC(N)=O	InChI=1S/C2H4N4O2/c3-1(7)5-6-2(4)8/h(H2,3,7)(H2,4,8)	InChI=1S/C2H4N4O2/c3-1(7)5-6-2(4)8/h(H2,3,7)(H2,4,8)	C2H4N4O2	116.033	123.175	122.554	121.962	Lite	0	0	0	0	0	0	0	0	0	0
DTXCID202123	2-Hydroxyethyl acrylate	818-61-1	OCCOC(=O)C=C	InChI=1S/C5H8O3/c1-2-5(7)8-4-3-6/h2,6H,1,3-4H2	InChI=1S/C5H8O3/c1-2-5(7)8-4-3-6/h2,6H,1,3-4H2	C5H8O3	116.047	121.174	121.381	121.411	Lite	0	0	0	0	0	0	0	0	0	0
DTXCID701648	4-Oxopentanoic acid	123-76-2	CC(=O)CCC(O)=O	InChI=1S/C5H8O3/c1-4(6)2-3-5(7)8/h2-3H2,1H3,(H,7,8)	InChI=1S/C5H8O3/c1-4(6)2-3-5(7)8/h2-3H2,1H3,(H,7,8)	C5H8O3	116.047	120.787	120.93	121.044	Lite	0	0	0	0	0	0	0	0	0	0
DTXCID7020342	Butylene carbonate	4437-85-8	CCC1COC(=O)O1	InChI=1/C5H8O3/c1-2-4-3-7-5(6)8-4/h4H,2-3H2,1H3	InChI=1/C5H8O3/c1-2-4-3-7-5(6)8-4/h4H,2-3H2,1H3	C5H8O3	116.047	119.838	119.775	119.624	Lite	0	0	0	0	0	0	0	0	0	0
DTXCID001056	N-Nitrosomorpholine	59-89-2	O=NN1CCOCC1	InChI=1S/C4H8N2O2/c7-5-6-1-3-8-4-2-6/h1-4H2	InChI=1S/C4H8N2O2/c7-5-6-1-3-8-4-2-6/h1-4H2	C4H8N2O2	116.059	119.632	117.965	117.721	Lite	0	0	0	0	0	0	0	0	0	0
DTXCID70197754	Dimethylglyoxime	95-45-4	CC(=NO)C(C)=NO	InChI=1S/C4H8N2O2/c1-3(5-7)4(2)6-8/h7-8H,1-2H3/b5-3+,6-4+	InChI=1S/C4H8N2O2/c1-3(5-7)4(2)6-8/h7-8H,1-2H3/b5-3+,6-4+	C4H8N2O2	116.059	124.372	123.186	121.844	Lite	0	0	0	0	0	0	1	0	0	0
DTXCID6022052	Indene	95-13-6	C1C=CC2=C1C=CC=C2	InChI=1S/C9H8/c1-2-5-9-7-3-6-8(9)4-1/h1-6H,7H2	InChI=1S/C9H8/c1-2-5-9-7-3-6-8(9)4-1/h1-6H,7H2	C9H8	116.063			119.497	Lite	0	0	0	0	0	0	0	0	0	0
DTXCID0021418	2-Ethylbutyric acid	88-09-5	CCC(CC)C(O)=O	InChI=1S/C6H12O2/c1-3-5(4-2)6(7)8/h5H,3-4H2,1-2H3,(H,7,8)	InChI=1S/C6H12O2/c1-3-5(4-2)6(7)8/h5H,3-4H2,1-2H3,(H,7,8)	C6H12O2	116.084			123.07	Lite	0	0	0	0	0	0	0	0	0	0
DTXCID101607	Hexanoic acid	142-62-1	CCCCCC(O)=O	InChI=1S/C6H12O2/c1-2-3-4-5-6(7)8/h2-5H2,1H3,(H,7,8)	InChI=1S/C6H12O2/c1-2-3-4-5-6(7)8/h2-5H2,1H3,(H,7,8)	C6H12O2	116.084			123.423	Lite	0	0	0	0	0	0	0	0	0	0
DTXCID101982	Butyl acetate	123-86-4	CCCCOC(C)=O	InChI=1S/C6H12O2/c1-3-4-5-8-6(2)7/h3-5H2,1-2H3	InChI=1S/C6H12O2/c1-3-4-5-8-6(2)7/h3-5H2,1-2H3	C6H12O2	116.084	123.844	123.391	123.047	Lite	0	0	0	0	0	0	0	0	0	0
DTXCID2022337	Propyl propionate	106-36-5	CCCOC(=O)CC	InChI=1S/C6H12O2/c1-3-5-8-6(7)4-2/h3-5H2,1-2H3	InChI=1S/C6H12O2/c1-3-5-8-6(7)4-2/h3-5H2,1-2H3	C6H12O2	116.084	123.878	123.551	123.074	Lite	0	0	0	0	0	0	0	0	0	0
DTXCID2031160	Methyl 2-methylbutyrate	868-57-5	CCC(C)C(=O)OC	InChI=1/C6H12O2/c1-4-5(2)6(7)8-3/h5H,4H2,1-3H3	InChI=1/C6H12O2/c1-4-5(2)6(7)8-3/h5H,4H2,1-3H3	C6H12O2	116.084	125.49	125.185	125.075	Lite	0	0	0	0	0	0	0	0	0	0
DTXCID304917	Diacetone alcohol	123-42-2	CC(=O)CC(C)(C)O	InChI=1S/C6H12O2/c1-5(7)4-6(2,3)8/h8H,4H2,1-3H3	InChI=1S/C6H12O2/c1-5(7)4-6(2,3)8/h8H,4H2,1-3H3	C6H12O2	116.084	123.687	122.803	122.569	Lite	0	0	0	0	0	0	0	0	0	0
DTXCID4020111	Ethyl butyrate	105-54-4	CCCC(=O)OCC	InChI=1S/C6H12O2/c1-3-5-6(7)8-4-2/h3-5H2,1-2H3	InChI=1S/C6H12O2/c1-3-5-6(7)8-4-2/h3-5H2,1-2H3	C6H12O2	116.084	124.346	123.897	123.889	Lite	0	0	0	0	0	0	0	0	0	0
DTXCID4024854	4-(Ethenyloxy)butan-1-ol	17832-28-9	OCCCCOC=C	InChI=1S/C6H12O2/c1-2-8-6-4-3-5-7/h2,7H,1,3-6H2	InChI=1S/C6H12O2/c1-2-8-6-4-3-5-7/h2,7H,1,3-6H2	C6H12O2	116.084	123.777	122.817	122.84	Lite	0	0	0	0	0	0	0	0	0	0
DTXCID702055	tert-Butyl acetate	540-88-5	CC(=O)OC(C)(C)C	InChI=1S/C6H12O2/c1-5(7)8-6(2,3)4/h1-4H3	InChI=1S/C6H12O2/c1-5(7)8-6(2,3)4/h1-4H3	C6H12O2	116.084	123.74	123.249	123.005	Lite	0	0	0	0	0	0	0	0	0	0
DTXCID20222	N-Butylurea	592-31-4	CCCCNC(N)=O	InChI=1S/C5H12N2O/c1-2-3-4-7-5(6)8/h2-4H2,1H3,(H3,6,7,8)	InChI=1S/C5H12N2O/c1-2-3-4-7-5(6)8/h2-4H2,1H3,(H3,6,7,8)	C5H12N2O	116.095	126.658	126.134	125.453	Lite	0	0	1	0	0	0	0	0	0	1
DTXCID407294	sec-Butylurea	689-11-2	CCC(C)NC(N)=O	InChI=1/C5H12N2O/c1-3-4(2)7-5(6)8/h4H,3H2,1-2H3,(H3,6,7,8)	InChI=1/C5H12N2O/c1-3-4(2)7-5(6)8/h4H,3H2,1-2H3,(H3,6,7,8)	C5H12N2O	116.095	126.335	125.75	125.348	Lite	0	0	0	1	0	0	0	0	0	1
DTXCID8024365	(1,1-Dimethylethyl)urea	1118-12-3	CC(C)(C)NC(N)=O	InChI=1S/C5H12N2O/c1-5(2,3)7-4(6)8/h1-3H3,(H3,6,7,8)	InChI=1S/C5H12N2O/c1-5(2,3)7-4(6)8/h1-3H3,(H3,6,7,8)	C5H12N2O	116.095	123.617	122.931	122.757	Lite	0	0	0	0	1	0	0	0	0	1
DTXCID601937	1-Heptanol	111-70-6	CCCCCCCO	InChI=1S/C7H16O/c1-2-3-4-5-6-7-8/h8H,2-7H2,1H3	InChI=1S/C7H16O/c1-2-3-4-5-6-7-8/h8H,2-7H2,1H3	C7H16O	116.12	126.686	126.254	126.598	Lite	0	0	0	0	0	0	0	0	0	0
DTXCID9027158	2-Heptanol	543-49-7	CCCCCC(C)O	InChI=1/C7H16O/c1-3-4-5-6-7(2)8/h7-8H,3-6H2,1-2H3	InChI=1/C7H16O/c1-3-4-5-6-7(2)8/h7-8H,3-6H2,1-2H3	C7H16O	116.12	128.243	127.387	127.153	Lite	0	0	0	0	0	0	0	0	0	0
DTXCID007772	2-Methylpentanediamine	15520-10-2	CC(CN)CCCN	InChI=1/C6H16N2/c1-6(5-8)3-2-4-7/h6H,2-5,7-8H2,1H3	InChI=1/C6H16N2/c1-6(5-8)3-2-4-7/h6H,2-5,7-8H2,1H3	C6H16N2	116.131	125.82	125.258	124.895	Lite	0	0	0	0	0	0	0	0	0	0
DTXCID206122	N,N,N',N'-Tetramethylethylenediamine	110-18-9	CN(C)CCN(C)C	InChI=1S/C6H16N2/c1-7(2)5-6-8(3)4/h5-6H2,1-4H3	InChI=1S/C6H16N2/c1-7(2)5-6-8(3)4/h5-6H2,1-4H3	C6H16N2	116.131	125.094	124.99	124.814	Lite	0	0	0	0	0	0	0	0	0	0
DTXCID604922	1,6-Hexanediamine	124-09-4	NCCCCCCN	InChI=1S/C6H16N2/c7-5-3-1-2-4-6-8/h1-8H2	InChI=1S/C6H16N2/c7-5-3-1-2-4-6-8/h1-8H2	C6H16N2	116.131	128.29	127.584	127.428	Lite	0	0	0	0	0	0	0	0	0	0
DTXCID20593	1-Ethyl-1-nitrosourea	759-73-9	CCN(N=O)C(N)=O	InChI=1S/C3H7N3O2/c1-2-6(5-8)3(4)7/h2H2,1H3,(H2,4,7)	InChI=1S/C3H7N3O2/c1-2-6(5-8)3(4)7/h2H2,1H3,(H2,4,7)	C3H7N3O2	117.054	119.967	119.37	119.16	Lite	0	0	0	0	0	0	0	0	0	0
DTXCID40737	Indole	120-72-9	N1C=CC2=C1C=CC=C2	InChI=1S/C8H7N/c1-2-4-8-7(3-1)5-6-9-8/h1-6,9H	InChI=1S/C8H7N/c1-2-4-8-7(3-1)5-6-9-8/h1-6,9H	C8H7N	117.058			118.07	Lite	0	0	0	0	0	0	0	0	0	0
DTXCID401837	N,N-Diethylethanolamine	100-37-8	CCN(CC)CCO	InChI=1S/C6H15NO/c1-3-7(4-2)5-6-8/h8H,3-6H2,1-2H3	InChI=1S/C6H15NO/c1-3-7(4-2)5-6-8/h8H,3-6H2,1-2H3	C6H15NO	117.115	124.308	124.076	123.97	Lite	0	0	0	0	0	0	0	0	0	0
DTXCID4024721	2-(Dimethylamino)-2-methylpropan-1-ol	7005-47-2	CN(C)C(C)(C)CO	InChI=1S/C6H15NO/c1-6(2,5-8)7(3)4/h8H,5H2,1-4H3	InChI=1S/C6H15NO/c1-6(2,5-8)7(3)4/h8H,5H2,1-4H3	C6H15NO	117.115	122.917	122.559	122.506	Lite	0	0	0	0	0	0	0	0	0	0
DTXCID9024431	2-(tert-Butylamino)ethanol	4620-70-6	CC(C)(C)NCCO	InChI=1S/C6H15NO/c1-6(2,3)7-4-5-8/h7-8H,4-5H2,1-3H3	InChI=1S/C6H15NO/c1-6(2,3)7-4-5-8/h7-8H,4-5H2,1-3H3	C6H15NO	117.115	124.575	123.874	123.943	Lite	0	0	0	0	0	0	0	0	0	0
DTXCID801294	3-Sulfolene	77-79-2	O=S1(=O)CC=CC1	InChI=1S/C4H6O2S/c5-7(6)3-1-2-4-7/h1-2H,3-4H2	InChI=1S/C4H6O2S/c5-7(6)3-1-2-4-7/h1-2H,3-4H2	C4H6O2S	118.009	114.868	114.177	113.711	Lite	0	0	0	0	0	0	0	0	0	0
DTXCID303602	Butanedioic acid	110-15-6	OC(=O)CCC(O)=O	InChI=1S/C4H6O4/c5-3(6)1-2-4(7)8/h1-2H2,(H,5,6)(H,7,8)	InChI=1S/C4H6O4/c5-3(6)1-2-4(7)8/h1-2H2,(H,5,6)(H,7,8)	C4H6O4	118.027			118.749	Lite	0	0	0	0	0	0	0	0	0	0
DTXCID5030616	4,5-Dihydroxytetrahydro-2H-imidazol-2-one	3720-97-6	OC1NC(=O)NC1O	InChI=1S/C3H6N2O3/c6-1-2(7)5-3(8)4-1/h1-2,6-7H,(H2,4,5,8)_x000D_	InChI=1/C3H6N2O3/c6-1-2(7)5-3(8)4-1/h1-2,6-7H,(H2,4,5,8)	C3H6N2O3	118.038	118.73	118.179	117.274	Lite	0	0	0	0	0	0	0	0	0	0
DTXCID20141	2,3-Benzofuran	271-89-6	O1C=CC2=C1C=CC=C2	InChI=1S/C8H6O/c1-2-4-8-7(3-1)5-6-9-8/h1-6H	InChI=1S/C8H6O/c1-2-4-8-7(3-1)5-6-9-8/h1-6H	C8H6O	118.042	117.166	116.723	116.119	Lite	0	0	0	0	0	0	0	0	0	0
DTXCID404628	Biurea	110-21-4	NC(=O)NNC(N)=O	InChI=1S/C2H6N4O2/c3-1(7)5-6-2(4)8/h(H3,3,5,7)(H3,4,6,8)	InChI=1S/C2H6N4O2/c3-1(7)5-6-2(4)8/h(H3,3,5,7)(H3,4,6,8)	C2H6N4O2	118.049	123.087	122.414	120.776	Lite	0	0	0	0	0	0	0	0	0	0
DTXCID4030380	2-Aminobenzonitrile	1885-29-6	NC1=C(C=CC=C1)C#N	InChI=1S/C7H6N2/c8-5-6-3-1-2-4-7(6)9/h1-4H,9H2	InChI=1S/C7H6N2/c8-5-6-3-1-2-4-7(6)9/h1-4H,9H2	C7H6N2	118.053	122.64	121.603	121.746	Lite	0	0	0	0	0	0	0	0	0	0
DTXCID704573	Benzimidazole	51-17-2	N1C=NC2=C1C=CC=C2	InChI=1S/C7H6N2/c1-2-4-7-6(3-1)8-5-9-7/h1-5H,(H,8,9)	InChI=1S/C7H6N2/c1-2-4-7-6(3-1)8-5-9-7/h1-5H,(H,8,9)	C7H6N2	118.053	118.529	117.811	117.33	Lite	0	0	0	0	0	1	0	0	0	1
DTXCID501404	1,1,3-Trimethyl-2-thiourea	2489-77-2	CNC(=S)N(C)C	InChI=1S/C4H10N2S/c1-5-4(7)6(2)3/h1-3H3,(H,5,7)	InChI=1S/C4H10N2S/c1-5-4(7)6(2)3/h1-3H3,(H,5,7)	C4H10N2S	118.056	119.699	119.364	119.086	Lite	0	0	0	0	0	0	1	0	0	1
DTXCID205553	2-Methoxyethyl acetate	110-49-6	COCCOC(C)=O	InChI=1S/C5H10O3/c1-5(6)8-4-3-7-2/h3-4H2,1-2H3_x000D_	InChI=1S/C5H10O3/c1-5(6)8-4-3-7-2/h3-4H2,1-2H3	C5H10O3	118.063	122.06	121.508	121.336	Lite	0	0	0	0	0	0	0	0	0	0
DTXCID4030627	Methyl 3-methoxypropionate	3852-09-03	COCCC(=O)OC	InChI=1S/C5H10O3/c1-7-4-3-5(6)8-2/h3-4H2,1-2H3	InChI=1S/C5H10O3/c1-7-4-3-5(6)8-2/h3-4H2,1-2H3	C5H10O3	118.063	122.399	121.952	121.947	Lite	0	0	0	0	0	0	0	0	0	0
DTXCID509127	(L)-(-)-Ethyl lactate	687-47-8	CCOC(=O)[C@H](C)O	InChI=1S/C5H10O3/c1-3-8-5(7)4(2)6/h4,6H,3H2,1-2H3/t4-/m0/s1	InChI=1S/C5H10O3/c1-3-8-5(7)4(2)6/h4,6H,3H2,1-2H3/t4-/m0/s1	C5H10O3	118.063	120.706	120.928	120.855	Lite	0	0	0	0	0	0	0	0	0	0
DTXCID10889	4-Methylstyrene	622-97-9	CC1=CC=C(C=C)C=C1	InChI=1S/C9H10/c1-3-9-6-4-8(2)5-7-9/h3-7H,1H2,2H3	InChI=1S/C9H10/c1-3-9-6-4-8(2)5-7-9/h3-7H,1H2,2H3	C9H10	118.078			125.255	Lite	0	0	0	0	0	0	0	0	0	0
DTXCID201436	3-Methylstyrene	100-80-1	CC1=CC(C=C)=CC=C1	InChI=1S/C9H10/c1-3-9-6-4-5-8(2)7-9/h3-7H,1H2,2H3	InChI=1S/C9H10/c1-3-9-6-4-5-8(2)7-9/h3-7H,1H2,2H3	C9H10	118.078			125.325	Lite	0	0	0	0	0	0	0	0	0	0
DTXCID9030701	Indan	496-11-7	C1CC2=CC=CC=C2C1	InChI=1S/C9H10/c1-2-5-9-7-3-6-8(9)4-1/h1-2,4-5H,3,6-7H2	InChI=1S/C9H10/c1-2-5-9-7-3-6-8(9)4-1/h1-2,4-5H,3,6-7H2	C9H10	118.078			120.981	Lite	0	0	0	0	0	0	0	0	0	0
DTXCID4030126	1-Hexanethiol	111-31-9	CCCCCCS	InChI=1S/C6H14S/c1-2-3-4-5-6-7/h7H,2-6H2,1H3	InChI=1S/C6H14S/c1-2-3-4-5-6-7/h7H,2-6H2,1H3	C6H14S	118.082			123.251	Lite	0	0	0	0	0	0	0	0	0	0
DTXCID20197007, DTXCID20197007	Betaine hydrochloride, Betaine	590-46-5, 107-43-7	[Cl-].C[N+](C)(C)CC(O)=O	InChI=1S/C5H11NO2.ClH/c1-6(2,3)4-5(7)8;/h4H2,1-3H3;1H	InChI=1S/C5H11NO2/c1-6(2,3)4-5(7)8/h4H2,1-3H3/p+1	C5H12NO2	118.087			121.075	Lite	0	0	0	0	0	0	0	0	0	0
DTXCID101885	2-Methyl-2,4-pentanediol	107-41-5	CC(O)CC(C)(C)O	InChI=1/C6H14O2/c1-5(7)4-6(2,3)8/h5,7-8H,4H2,1-3H3	InChI=1/C6H14O2/c1-5(7)4-6(2,3)8/h5,7-8H,4H2,1-3H3	C6H14O2	118.099	123.58	122.646	122.457	Lite	0	0	0	0	0	0	0	0	0	0
DTXCID305285	Ethylene glycol diethyl ether	629-14-1	CCOCCOCC	InChI=1S/C6H14O2/c1-3-7-5-6-8-4-2/h3-6H2,1-2H3	InChI=1S/C6H14O2/c1-3-7-5-6-8-4-2/h3-6H2,1-2H3	C6H14O2	118.099	125.442	125.426	125.099	Lite	0	0	0	0	0	0	0	0	0	0
DTXCID409217	1-Propoxy-2-propanol	1569-01-3	CCCOCC(C)O	InChI=1/C6H14O2/c1-3-4-8-5-6(2)7/h6-7H,3-5H2,1-2H3	InChI=1/C6H14O2/c1-3-4-8-5-6(2)7/h6-7H,3-5H2,1-2H3	C6H14O2	118.099	126.989	126.111	125.852	Lite	0	0	0	0	0	0	0	0	0	0
DTXCID6024389	3-Methoxy-3-methylbutan-1-ol	56539-66-3	COC(C)(C)CCO	InChI=1S/C6H14O2/c1-6(2,8-3)4-5-7/h7H,4-5H2,1-3H3	InChI=1S/C6H14O2/c1-6(2,8-3)4-5-7/h7H,4-5H2,1-3H3	C6H14O2	118.099	122.692	122.705	122.697	Lite	0	0	0	0	0	0	0	0	0	0
DTXCID904097	2-Butoxyethanol	111-76-2	CCCCOCCO	InChI=1S/C6H14O2/c1-2-3-5-8-6-4-7/h7H,2-6H2,1H3	InChI=1S/C6H14O2/c1-2-3-5-8-6-4-7/h7H,2-6H2,1H3	C6H14O2	118.099	125.162	125.021	125.097	Lite	0	0	0	0	0	0	0	0	0	0
DTXCID10982	3-Nitropropionic acid	504-88-1	OC(=O)CC[N+]([O-])=O	InChI=1S/C3H5NO4/c5-3(6)1-2-4(7)8/h1-2H2,(H,5,6)	InChI=1S/C3H5NO4/c5-3(6)1-2-4(7)8/h1-2H2,(H,5,6)	C3H5NO4	119.022	118.871	118.318	118.779	Lite	0	0	0	0	0	0	0	1	0	0
DTXCID1021661	2-Hydroxybenzonitrile	611-20-1	OC1=C(C=CC=C1)C#N	InChI=1S/C7H5NO/c8-5-6-3-1-2-4-7(6)9/h1-4,9H	InChI=1S/C7H5NO/c8-5-6-3-1-2-4-7(6)9/h1-4,9H	C7H5NO	119.037	122.1	121.763	121.68	Lite	0	0	0	0	0	0	1	0	0	0
DTXCID7031082	4-Hydroxybenzonitrile	767-00-0	OC1=CC=C(C=C1)C#N	InChI=1S/C7H5NO/c8-5-6-1-3-7(9)4-2-6/h1-4,9H	InChI=1S/C7H5NO/c8-5-6-1-3-7(9)4-2-6/h1-4,9H	C7H5NO	119.037	123.618	122.972	122.679	Lite	0	0	0	0	0	0	0	0	0	0
DTXCID00147	1,2,3-Benzotriazole	95-14-7	N1N=NC2=C1C=CC=C2	InChI=1S/C6H5N3/c1-2-4-6-5(3-1)7-9-8-6/h1-4H,(H,7,8,9)	InChI=1S/C6H5N3/c1-2-4-6-5(3-1)7-9-8-6/h1-4H,(H,7,8,9)	C6H5N3	119.048	117.889	117.305	116.823	Lite	0	0	0	0	0	0	0	1	0	0
DTXCID706436	2-Methyl-2-nitro-1-propanol	76-39-1	CC(C)(CO)[N+]([O-])=O	InChI=1S/C4H9NO3/c1-4(2,3-6)5(7)8/h6H,3H2,1-2H3	InChI=1S/C4H9NO3/c1-4(2,3-6)5(7)8/h6H,3H2,1-2H3	C4H9NO3	119.058	120.271	120.028	119.754	Lite	0	0	0	0	0	0	0	0	0	0
DTXCID4030702	Indoline	496-15-1	C1CC2=CC=CC=C2N1	InChI=1S/C8H9N/c1-2-4-8-7(3-1)5-6-9-8/h1-4,9H,5-6H2_x000D_	InChI=1S/C8H9N/c1-2-4-8-7(3-1)5-6-9-8/h1-4,9H,5-6H2	C8H9N	119.073	120.818	120.266	120.067	Lite	0	0	0	0	0	0	0	0	0	0
DTXCID3022378	Chloro(dimethyl)vinylsilane	1719-58-0	C[Si](C)(Cl)C=C	InChI=1S/C4H9ClSi/c1-4-6(2,3)5/h4H,1H2,2-3H3	InChI=1S/C4H9ClSi/c1-4-6(2,3)5/h4H,1H2,2-3H3	C4H9ClSi	120.016				NA	0	0	0	0	0	0	0	0	0	0
DTXCID9018824	1,4-Dioxane-2,3-diol	4845-50-5	OC1OCCOC1O	InChI=1/C4H8O4/c5-3-4(6)8-2-1-7-3/h3-6H,1-2H2	InChI=1/C4H8O4/c5-3-4(6)8-2-1-7-3/h3-6H,1-2H2	C4H8O4	120.042	117.959	116.743	116.637	Lite	0	0	0	0	0	0	0	0	0	0
DTXCID305141	Dimethylolurea	140-95-4	OCNC(=O)NCO	InChI=1S/C3H8N2O3/c6-1-4-3(8)5-2-7/h6-7H,1-2H2,(H2,4,5,8)	InChI=1S/C3H8N2O3/c6-1-4-3(8)5-2-7/h6-7H,1-2H2,(H2,4,5,8)	C3H8N2O3	120.053	124.746	124.208	124.068	Lite	0	0	0	0	0	0	0	0	0	0
DTXCID102051	2-Tolualdehyde	529-20-4	CC1=C(C=O)C=CC=C1	InChI=1S/C8H8O/c1-7-4-2-3-5-8(7)6-9/h2-6H,1H3	InChI=1S/C8H8O/c1-7-4-2-3-5-8(7)6-9/h2-6H,1H3	C8H8O	120.058	122.565	122.137	121.994	Lite	0	0	0	0	0	0	0	0	0	0
DTXCID301286	Styrene oxide	96-09-3	C1OC1C1=CC=CC=C1	InChI=1/C8H8O/c1-2-4-7(5-3-1)8-6-9-8/h1-5,8H,6H2	InChI=1/C8H8O/c1-2-4-7(5-3-1)8-6-9-8/h1-5,8H,6H2	C8H8O	120.058	122.403	122.602	122.143	Lite	0	0	0	0	0	0	0	0	0	0
DTXCID501483	Phenylacetaldehyde	122-78-1	O=CCC1=CC=CC=C1	InChI=1S/C8H8O/c9-7-6-8-4-2-1-3-5-8/h1-5,7H,6H2	InChI=1S/C8H8O/c9-7-6-8-4-2-1-3-5-8/h1-5,7H,6H2	C8H8O	120.058	124.377	123.77	123.772	Lite	0	0	0	0	0	0	0	0	0	0
DTXCID501828	Acetophenone	98-86-2	CC(=O)C1=CC=CC=C1	InChI=1S/C8H8O/c1-7(9)8-5-3-2-4-6-8/h2-6H,1H3	InChI=1S/C8H8O/c1-7(9)8-5-3-2-4-6-8/h2-6H,1H3	C8H8O	120.058	123.589	123.041	122.93	Lite	0	0	0	0	0	0	0	0	0	0
DTXCID7021520	4-Methylbenzaldehyde	104-87-0	CC1=CC=C(C=O)C=C1	InChI=1S/C8H8O/c1-7-2-4-8(6-9)5-3-7/h2-6H,1H3	InChI=1S/C8H8O/c1-7-2-4-8(6-9)5-3-7/h2-6H,1H3	C8H8O	120.058	125.005	124.564	124.206	Lite	0	0	0	0	0	0	0	0	0	0
DTXCID8022379	Dimethoxydimethylsilane	1112-39-6	CO[Si](C)(C)OC	InChI=1S/C4H12O2Si/c1-5-7(3,4)6-2/h1-4H3	InChI=1S/C4H12O2Si/c1-5-7(3,4)6-2/h1-4H3	C4H12O2Si	120.061	115.759	115.636	115.322	Lite	0	0	0	0	0	0	0	0	0	0
DTXCID6025012	Benzenecarboximidamide, monohydrochloride	1670-14-0	Cl.NC(=N)C1=CC=CC=C1	InChI=1S/C7H8N2.ClH/c8-7(9)6-4-2-1-3-5-6;/h1-5H,(H3,8,9);1H	InChI=1S/C7H8N2/c8-7(9)6-4-2-1-3-5-6/h1-5H,(H3,8,9)	C7H8N2	120.069	122.929	122.462	122.2	Lite	0	0	0	0	0	0	0	0	0	0
DTXCID305049	Diethylene glycol monomethyl ether	111-77-3	COCCOCCO	InChI=1S/C5H12O3/c1-7-4-5-8-3-2-6/h6H,2-5H2,1H3	InChI=1S/C5H12O3/c1-7-4-5-8-3-2-6/h6H,2-5H2,1H3	C5H12O3	120.079	122.646	122.433	122.829	Lite	0	0	0	0	0	0	0	0	0	0
DTXCID1022219	Propylbenzene	103-65-1	CCCC1=CC=CC=C1	InChI=1S/C9H12/c1-2-6-9-7-4-3-5-8-9/h3-5,7-8H,2,6H2,1H3	InChI=1S/C9H12/c1-2-6-9-7-4-3-5-8-9/h3-5,7-8H,2,6H2,1H3	C9H12	120.094			125.693	Lite	0	0	0	0	0	0	0	0	0	0
DTXCID30209382	5-Ethylidene-2-norbornene	16219-75-3	CC=C1CC2CC1C=C2	InChI=1/C9H12/c1-2-8-5-7-3-4-9(8)6-7/h2-4,7,9H,5-6H2,1H3	InChI=1/C9H12/c1-2-8-5-7-3-4-9(8)6-7/h2-4,7,9H,5-6H2,1H3	C9H12	120.094			122.968	Lite	0	0	0	0	0	0	0	0	0	0
DTXCID5029477	1-Ethyl-2-methylbenzene	611-14-3	CCC1=CC=CC=C1C	InChI=1S/C9H12/c1-3-9-7-5-4-6-8(9)2/h4-7H,3H2,1-2H3	InChI=1S/C9H12/c1-3-9-7-5-4-6-8(9)2/h4-7H,3H2,1-2H3	C9H12	120.094			124.968	Lite	0	0	0	0	0	0	0	0	0	0
DTXCID506797	1,3,5-Trimethylbenzene	108-67-8	CC1=CC(C)=CC(C)=C1	InChI=1S/C9H12/c1-7-4-8(2)6-9(3)5-7/h4-6H,1-3H3	InChI=1S/C9H12/c1-7-4-8(2)6-9(3)5-7/h4-6H,1-3H3	C9H12	120.094			127.788	Lite	0	0	0	0	0	0	0	0	0	0
DTXCID701402	1,2,4-Trimethylbenzene	95-63-6	CC1=CC(C)=C(C)C=C1	InChI=1S/C9H12/c1-7-4-5-8(2)9(3)6-7/h4-6H,1-3H3	InChI=1S/C9H12/c1-7-4-5-8(2)9(3)6-7/h4-6H,1-3H3	C9H12	120.094			126.047	Lite	0	0	0	0	0	0	0	0	0	0
DTXCID7027750	1,2,3-Trimethylbenzene	526-73-8	CC1=CC=CC(C)=C1C	InChI=1S/C9H12/c1-7-5-4-6-8(2)9(7)3/h4-6H,1-3H3	InChI=1S/C9H12/c1-7-5-4-6-8(2)9(7)3/h4-6H,1-3H3	C9H12	120.094			124.686	Lite	0	0	0	0	0	0	0	0	0	0
DTXCID0023797, DTXCID0023797, DTXCID70180	Sodium dimethyldithiocarbamate, Ziram, Bismuth dimethyldithiocarbamate	128-04-1, 137-30-4, 21260-46-8	[Na+].CN(C)C([S-])=S	InChI=1S/C3H7NS2.Na/c1-4(2)3(5)6;/h1-2H3,(H,5,6);/q;+1/p-1	InChI=1S/C3H7NS2/c1-4(2)3(5)6/h1-2H3,(H,5,6)	C3H7NS2	121.002			114.936	Lite	0	0	0	0	0	0	0	0	0	0
DTXCID3026988	l-Cysteine hydrochloride	52-89-1	Cl.N[C@@H](CS)C(O)=O	InChI=1S/C3H7NO2S.ClH/c4-2(1-7)3(5)6;/h2,7H,1,4H2,(H,5,6);1H/t2-;/m0./s1	InChI=1S/C3H7NO2S/c4-2(1-7)3(5)6/h2,7H,1,4H2,(H,5,6)/t2-/m0/s1	C3H7NO2S	121.02	117.748	116.969	116.605	Lite	0	0	0	0	0	0	0	0	0	0
DTXCID6020725	4-Chloromercuribenzoic acid	59-85-8	OC(=O)C1=CC=C([Hg]Cl)C=C1	InChI=1S/C7H5O2.ClH.Hg/c8-7(9)6-4-2-1-3-5-6;;/h2-5H,(H,8,9);1H;/q;;+1/p-1	InChI=1S/C7H5O2/c8-7(9)6-4-2-1-3-5-6/h2-5H,(H,8,9)	C7H5O2	121.029			120.44	Lite	0	0	0	0	0	0	0	0	0	0
DTXCID5024421	3-Acetylpyridine	350-03-8	CC(=O)C1=CN=CC=C1	InChI=1S/C7H7NO/c1-6(9)7-3-2-4-8-5-7/h2-5H,1H3	InChI=1S/C7H7NO/c1-6(9)7-3-2-4-8-5-7/h2-5H,1H3	C7H7NO	121.053	123.314	122.619	122.299	Lite	0	0	0	0	0	0	0	0	0	0
DTXCID804409	2-Acetylpyridine	1122-62-9	CC(=O)C1=CC=CC=N1	InChI=1S/C7H7NO/c1-6(9)7-4-2-3-5-8-7/h2-5H,1H3	InChI=1S/C7H7NO/c1-6(9)7-4-2-3-5-8-7/h2-5H,1H3	C7H7NO	121.053	123.241	122.928	122.764	Lite	0	0	0	0	0	0	0	0	0	0
DTXCID2023858	2-Chloropropyldimethylamine hydrochloride	4584-49-0	Cl.CC(Cl)CN(C)C	InChI=1/C5H12ClN.ClH/c1-5(6)4-7(2)3;/h5H,4H2,1-3H3;1H	InChI=1/C5H12ClN/c1-5(6)4-7(2)3/h5H,4H2,1-3H3	C5H12ClN	121.066	116.274	115.678	115.697	Lite	0	0	0	0	0	0	0	0	0	0
DTXCID503723, DTXCID503723	Tromethamine hydrochloride, Tromethamine	1185-53-1, 77-86-1	Cl.NC(CO)(CO)CO	InChI=1S/C4H11NO3.ClH/c5-4(1-6,2-7)3-8;/h6-8H,1-3,5H2;1H	InChI=1S/C4H11NO3/c5-4(1-6,2-7)3-8/h6-8H,1-3,5H2	C4H11NO3	121.074	120.448	120.081	120.243	Lite	0	0	0	0	0	0	0	0	0	0
DTXCID006307	2,6-Dimethylaniline	87-62-7	CC1=CC=CC(C)=C1N	InChI=1S/C8H11N/c1-6-4-3-5-7(2)8(6)9/h3-5H,9H2,1-2H3	InChI=1S/C8H11N/c1-6-4-3-5-7(2)8(6)9/h3-5H,9H2,1-2H3	C8H11N	121.089	124.526	123.853	123.906	Lite	0	0	0	0	0	0	0	0	0	0
DTXCID405271	N-Ethylaniline	103-69-5	CCNC1=CC=CC=C1	InChI=1S/C8H11N/c1-2-9-8-6-4-3-5-7-8/h3-7,9H,2H2,1H3	InChI=1S/C8H11N/c1-2-9-8-6-4-3-5-7-8/h3-7,9H,2H2,1H3	C8H11N	121.089	126.365	126.1	126.161	Lite	0	0	0	0	0	0	0	0	0	0
DTXCID60507	N,N-Dimethylaniline	121-69-7	CN(C)C1=CC=CC=C1	InChI=1S/C8H11N/c1-9(2)8-6-4-3-5-7-8/h3-7H,1-2H3	InChI=1S/C8H11N/c1-9(2)8-6-4-3-5-7-8/h3-7H,1-2H3	C8H11N	121.089	124.967	124.318	124.069	Lite	0	0	0	0	0	0	0	0	0	0
DTXCID8022242	2-Ethylaniline	578-54-1	CCC1=C(N)C=CC=C1	InChI=1S/C8H11N/c1-2-7-5-3-4-6-8(7)9/h3-6H,2,9H2,1H3	InChI=1S/C8H11N/c1-2-7-5-3-4-6-8(7)9/h3-6H,2,9H2,1H3	C8H11N	121.089	125.004	124.154	124.14	Lite	0	0	0	0	0	0	0	0	0	0
DTXCID806304	2,3-Dimethylaniline	87-59-2	CC1=CC=CC(N)=C1C	InChI=1S/C8H11N/c1-6-4-3-5-8(9)7(6)2/h3-5H,9H2,1-2H3	InChI=1S/C8H11N/c1-6-4-3-5-8(9)7(6)2/h3-5H,9H2,1-2H3	C8H11N	121.089	124.78	124.116	123.756	Lite	0	0	0	0	0	0	0	0	0	0
DTXCID901861	5-Ethyl-2-methylpyridine	104-90-5	CCC1=CN=C(C)C=C1	InChI=1S/C8H11N/c1-3-8-5-4-7(2)9-6-8/h4-6H,3H2,1-2H3	InChI=1S/C8H11N/c1-3-8-5-4-7(2)9-6-8/h4-6H,3H2,1-2H3	C8H11N	121.089	127.193	126.69	126.384	Lite	0	0	0	0	0	0	0	0	0	0
DTXCID1025063, DTXCID1025063	Sodium O-ethyl carbonodithioate, Potassium ethyl xanthate	140-90-9, 140-89-6	[Na+].CCOC([S-])=S	InChI=1S/C3H6OS2.Na/c1-2-4-3(5)6;/h2H2,1H3,(H,5,6);/q;+1/p-1	InChI=1S/C3H6OS2/c1-2-4-3(5)6/h2H2,1H3,(H,5,6)	C3H6OS2	121.986			115.399	Lite	0	0	0	0	0	0	0	0	0	0
DTXCID001195	1,3-Propane sultone	1120-71-4	O=S1(=O)CCCO1	InChI=1S/C3H6O3S/c4-7(5)3-1-2-6-7/h1-3H2	InChI=1S/C3H6O3S/c4-7(5)3-1-2-6-7/h1-3H2	C3H6O3S	122.004	115.263	114.652	114.363	Lite	0	0	0	0	0	0	0	0	0	0
DTXCID4027024	2-Propene-1-sulfonic acid, sodium salt	2495-39-8	[Na+].[O-]S(=O)(=O)CC=C	InChI=1S/C3H6O3S.Na/c1-2-3-7(4,5)6;/h2H,1,3H2,(H,4,5,6);/q;+1/p-1	InChI=1S/C3H6O3S/c1-2-3-7(4,5)6/h2H,1,3H2,(H,4,5,6)	C3H6O3S	122.004			117.873	Lite	0	0	0	0	0	0	0	0	0	0
DTXCID3027089	2,3-Butanedithiol	4532-64-3	CC(S)C(C)S	InChI=1/C4H10S2/c1-3(5)4(2)6/h3-6H,1-2H3	InChI=1/C4H10S2/c1-3(5)4(2)6/h3-6H,1-2H3	C4H10S2	122.022			116.773	Lite	0	0	0	0	0	0	0	0	0	0
DTXCID308872	Diethyl disulphide	110-81-6	CCSSCC	InChI=1S/C4H10S2/c1-3-5-6-4-2/h3-4H2,1-2H3_x000D_	InChI=1S/C4H10S2/c1-3-5-6-4-2/h3-4H2,1-2H3	C4H10S2	122.022				NA	0	0	0	0	0	0	0	0	0	0
NoDTXCID17, DTXCID3014981, DTXCID80143, DTXCID80143	Magnesium dibenzoate, Tributyltin benzoate, Benzoic acid, Sodium benzoate	553-70-8, 4342-36-3, 65-85-0, 532-32-1	[Mg++].[O-]C(=O)C1=CC=CC=C1.[O-]C(=O)C1=CC=CC=C1	InChI=1S/2C7H6O2.Mg/c2*8-7(9)6-4-2-1-3-5-6;/h2*1-5H,(H,8,9);/q;;+2/p-2	InChI=1S/C7H6O2/c8-7(9)6-4-2-1-3-5-6/h1-5H,(H,8,9)	C7H6O2	122.037			121.391	Lite	1	0	0	0	1	0	1	1	0	0
DTXCID001792	Salicylaldehyde	90-02-8	OC1=CC=CC=C1C=O	InChI=1S/C7H6O2/c8-5-6-3-1-2-4-7(6)9/h1-5,9H	InChI=1S/C7H6O2/c8-5-6-3-1-2-4-7(6)9/h1-5,9H	C7H6O2	122.037	121.937	120.884	121.047	Lite	0	0	0	0	0	0	0	0	0	0
DTXCID2030514	1,3-Benzodioxolane	274-09-9	C1OC2=CC=CC=C2O1	InChI=1S/C7H6O2/c1-2-4-7-6(3-1)8-5-9-7/h1-4H,5H2_x000D_	InChI=1S/C7H6O2/c1-2-4-7-6(3-1)8-5-9-7/h1-4H,5H2	C7H6O2	122.037	118.885	118.845	118.228	Lite	0	0	0	0	0	0	0	0	0	0
DTXCID707482	Trimethoxysilane	2487-90-3	CO[SiH](OC)OC	InChI=1S/C3H10O3Si/c1-4-7(5-2)6-3/h7H,1-3H3_x000D_	InChI=1S/C3H10O3Si/c1-4-7(5-2)6-3/h7H,1-3H3	C3H10O3Si	122.04	118.268	118.632	118.129	Lite	0	0	0	0	0	0	0	0	0	0
DTXCID00929	Niacinamide	98-92-0	NC(=O)C1=CC=CN=C1	InChI=1S/C6H6N2O/c7-6(9)5-2-1-3-8-4-5/h1-4H,(H2,7,9)	InChI=1S/C6H6N2O/c7-6(9)5-2-1-3-8-4-5/h1-4H,(H2,7,9)	C6H6N2O	122.048	121.825	121.499	121.067	Lite	0	0	0	0	0	0	1	0	0	0
DTXCID3027085	Acetylpyrazine	22047-25-2	CC(=O)C1=NC=CN=C1	InChI=1S/C6H6N2O/c1-5(9)6-4-7-2-3-8-6/h2-4H,1H3	InChI=1S/C6H6N2O/c1-5(9)6-4-7-2-3-8-6/h2-4H,1H3	C6H6N2O	122.048	122.517	122.045	121.941	Lite	0	0	0	0	0	0	0	0	0	0
DTXCID004062	3,4-Dimethylphenol	95-65-8	CC1=C(C)C=C(O)C=C1	InChI=1S/C8H10O/c1-6-3-4-8(9)5-7(6)2/h3-5,9H,1-2H3	InChI=1S/C8H10O/c1-6-3-4-8(9)5-7(6)2/h3-5,9H,1-2H3	C8H10O	122.073	125.673	124.638	124.578	Lite	0	0	0	0	0	0	0	0	0	0
DTXCID101864	2,4-Dimethylphenol	105-67-9	CC1=CC(C)=C(O)C=C1	InChI=1S/C8H10O/c1-6-3-4-8(9)7(2)5-6/h3-5,9H,1-2H3	InChI=1S/C8H10O/c1-6-3-4-8(9)7(2)5-6/h3-5,9H,1-2H3	C8H10O	122.073	125.742	124.948	124.738	Lite	0	0	0	0	0	0	0	0	0	0
DTXCID105143	2,3-Dimethylphenol	526-75-0	CC1=C(C)C(O)=CC=C1	InChI=1S/C8H10O/c1-6-4-3-5-8(9)7(6)2/h3-5,9H,1-2H3	InChI=1S/C8H10O/c1-6-4-3-5-8(9)7(6)2/h3-5,9H,1-2H3	C8H10O	122.073	123.694	123.356	123.441	Lite	0	0	0	0	0	0	0	0	0	0
DTXCID105148	3,5-Dimethylphenol	108-68-9	CC1=CC(O)=CC(C)=C1	InChI=1S/C8H10O/c1-6-3-7(2)5-8(9)4-6/h3-5,9H,1-2H3	InChI=1S/C8H10O/c1-6-3-7(2)5-8(9)4-6/h3-5,9H,1-2H3	C8H10O	122.073	126.853	126.111	126.034	Lite	0	0	0	0	0	0	0	0	0	0
DTXCID206342	2-Phenylethanol	60-12-8	OCCC1=CC=CC=C1	InChI=1S/C8H10O/c9-7-6-8-4-2-1-3-5-8/h1-5,9H,6-7H2	InChI=1S/C8H10O/c9-7-6-8-4-2-1-3-5-8/h1-5,9H,6-7H2	C8H10O	122.073	124.951	124.53	124.289	Lite	0	0	0	0	0	0	0	0	0	0
DTXCID402480	3-Ethylphenol	620-17-7	CCC1=CC=CC(O)=C1	InChI=1S/C8H10O/c1-2-7-4-3-5-8(9)6-7/h3-6,9H,2H2,1H3	InChI=1S/C8H10O/c1-2-7-4-3-5-8(9)6-7/h3-6,9H,2H2,1H3	C8H10O	122.073	125.901	125.486	125.382	Lite	0	0	0	0	0	0	0	1	0	0
DTXCID404063	2,6-Dimethylphenol	576-26-1	CC1=CC=CC(C)=C1O	InChI=1S/C8H10O/c1-6-4-3-5-7(2)8(6)9/h3-5,9H,1-2H3	InChI=1S/C8H10O/c1-6-4-3-5-7(2)8(6)9/h3-5,9H,1-2H3	C8H10O	122.073	123.815	123.506	123.79	Lite	0	0	0	0	0	0	0	0	0	0
DTXCID702479	2-Ethylphenol	90-00-6	CCC1=C(O)C=CC=C1	InChI=1S/C8H10O/c1-2-7-5-3-4-6-8(7)9/h3-6,9H,2H2,1H3	InChI=1S/C8H10O/c1-2-7-5-3-4-6-8(7)9/h3-6,9H,2H2,1H3	C8H10O	122.073	124.919	124.151	124.348	Lite	0	0	0	0	0	0	0	0	0	0
DTXCID801977	4-Ethylphenol	123-07-9	CCC1=CC=C(O)C=C1	InChI=1S/C8H10O/c1-2-7-3-5-8(9)6-4-7/h3-6,9H,2H2,1H3	InChI=1S/C8H10O/c1-2-7-3-5-8(9)6-4-7/h3-6,9H,2H2,1H3	C8H10O	122.073	126.399	125.795	125.515	Lite	0	0	0	0	0	0	0	0	0	0
DTXCID9030048	3-Methoxytoluene	100-84-5	COC1=CC=CC(C)=C1	InChI=1S/C8H10O/c1-7-4-3-5-8(6-7)9-2/h3-6H,1-2H3_x000D_	InChI=1S/C8H10O/c1-7-4-3-5-8(6-7)9-2/h3-6H,1-2H3	C8H10O	122.073	126.577	125.807	125.285	Lite	0	0	0	0	0	0	0	0	0	0
DTXCID905145	2,5-Dimethylphenol	95-87-4	CC1=CC(O)=C(C)C=C1	InChI=1S/C8H10O/c1-6-3-4-7(2)8(9)5-6/h3-5,9H,1-2H3	InChI=1S/C8H10O/c1-6-3-4-7(2)8(9)5-6/h3-5,9H,1-2H3	C8H10O	122.073	125.434	124.832	124.879	Lite	0	0	0	0	0	0	0	0	0	0
DTXCID00402	2,4-Diaminotoluene	95-80-7	CC1=C(N)C=C(N)C=C1	InChI=1S/C7H10N2/c1-5-2-3-6(8)4-7(5)9/h2-4H,8-9H2,1H3	InChI=1S/C7H10N2/c1-5-2-3-6(8)4-7(5)9/h2-4H,8-9H2,1H3	C7H10N2	122.084	124.672	124.026	123.809	Lite	0	0	0	0	0	0	0	0	0	0
DTXCID104930	3,4-Diaminotoluene	496-72-0	CC1=CC=C(N)C(N)=C1	InChI=1S/C7H10N2/c1-5-2-3-6(8)7(9)4-5/h2-4H,8-9H2,1H3	InChI=1S/C7H10N2/c1-5-2-3-6(8)7(9)4-5/h2-4H,8-9H2,1H3	C7H10N2	122.084	124.506	124.03	123.504	Lite	0	0	0	0	0	0	0	0	0	0
DTXCID2027464	3-Ethyl-2-methylpyrazine	15707-23-0	CCC1=NC=CN=C1C	InChI=1S/C7H10N2/c1-3-7-6(2)8-4-5-9-7/h4-5H,3H2,1-2H3	InChI=1S/C7H10N2/c1-3-7-6(2)8-4-5-9-7/h4-5H,3H2,1-2H3	C7H10N2	122.084	124.696	124.186	123.744	Lite	0	0	0	0	0	0	0	0	0	0
DTXCID707869	2-Methyl-1,4-benzenediamine	95-70-5	CC1=C(N)C=CC(N)=C1	InChI=1S/C7H10N2/c1-5-4-6(8)2-3-7(5)9/h2-4H,8-9H2,1H3_x000D_	InChI=1S/C7H10N2/c1-5-4-6(8)2-3-7(5)9/h2-4H,8-9H2,1H3	C7H10N2	122.084	124.661	123.978	123.824	Lite	0	0	0	0	0	0	0	0	0	0
DTXCID8024369	N,N-dimethylpyridin-4-amine	1122-58-3	CN(C)C1=CC=NC=C1	InChI=1S/C7H10N2/c1-9(2)7-3-5-8-6-4-7/h3-6H,1-2H3	InChI=1S/C7H10N2/c1-9(2)7-3-5-8-6-4-7/h3-6H,1-2H3	C7H10N2	122.084	124.441	123.943	123.447	Lite	0	0	0	0	0	0	0	0	0	0
DTXCID807494	2,3-Diaminotoluene	2687-25-4	CC1=C(N)C(N)=CC=C1	InChI=1S/C7H10N2/c1-5-3-2-4-6(8)7(5)9/h2-4H,8-9H2,1H3	InChI=1S/C7H10N2/c1-5-3-2-4-6(8)7(5)9/h2-4H,8-9H2,1H3	C7H10N2	122.084	123.196	122.767	122.534	Lite	0	0	0	0	0	0	0	0	0	0
DTXCID9027075	2,3,5-Trimethylpyrazine	14667-55-1	CC1=CN=C(C)C(C)=N1	InChI=1S/C7H10N2/c1-5-4-8-6(2)7(3)9-5/h4H,1-3H3	InChI=1S/C7H10N2/c1-5-4-8-6(2)7(3)9-5/h4H,1-3H3	C7H10N2	122.084	125.888	125.535	125.225	Lite	0	0	0	0	0	0	0	0	0	0
DTXCID0021412	2-Chloro-N-(hydroxymethyl)acetamide	2832-19-1	OCNC(=O)CCl	InChI=1S/C3H6ClNO2/c4-1-3(7)5-2-6/h6H,1-2H2,(H,5,7)	InChI=1S/C3H6ClNO2/c4-1-3(7)5-2-6/h6H,1-2H2,(H,5,7)	C3H6ClNO2	123.009	112.521	111.901	111.582	Lite	0	0	0	0	0	0	0	0	0	0
DTXCID10932, DTXCID10932	Sodium nicotinate, Nicotinic acid	54-86-4, 59-67-6	[Na+].[O-]C(=O)C1=CN=CC=C1	InChI=1S/C6H5NO2.Na/c8-6(9)5-2-1-3-7-4-5;/h1-4H,(H,8,9);/q;+1/p-1	InChI=1S/C6H5NO2/c8-6(9)5-2-1-3-7-4-5/h1-4H,(H,8,9)	C6H5NO2	123.032	121.617	120.964	120.669	Lite	0	0	0	0	0	0	0	1	0	0
DTXCID30964	Nitrobenzene	98-95-3	[O-][N+](=O)C1=CC=CC=C1	InChI=1S/C6H5NO2/c8-7(9)6-4-2-1-3-5-6/h1-5H	InChI=1S/C6H5NO2/c8-7(9)6-4-2-1-3-5-6/h1-5H	C6H5NO2	123.032	121.643	120.779	120.624	Lite	0	0	0	0	0	0	0	0	0	0
DTXCID405991	4-Nitrosophenol	104-91-6	OC1=CC=C(C=C1)N=O	InChI=1S/C6H5NO2/c8-6-3-1-5(7-9)2-4-6/h1-4,8H	InChI=1S/C6H5NO2/c8-6-3-1-5(7-9)2-4-6/h1-4,8H	C6H5NO2	123.032	124.17	121.521	121.532	Lite	0	0	0	0	0	0	0	0	0	0
DTXCID801215	Pyrazinamide	98-96-4	NC(=O)C1=NC=CN=C1	InChI=1S/C5H5N3O/c6-5(9)4-3-7-1-2-8-4/h1-3H,(H2,6,9)	InChI=1S/C5H5N3O/c6-5(9)4-3-7-1-2-8-4/h1-3H,(H2,6,9)	C5H5N3O	123.043	121.398	120.767	120.619	Lite	0	0	0	0	0	0	1	0	0	0
DTXCID0024767	2-(Pyridin-2-yl)ethanol	103-74-2	OCCC1=NC=CC=C1	InChI=1S/C7H9NO/c9-6-4-7-3-1-2-5-8-7/h1-3,5,9H,4,6H2	InChI=1S/C7H9NO/c9-6-4-7-3-1-2-5-8-7/h1-3,5,9H,4,6H2	C7H9NO	123.068	124.283	124.123	124.119	Lite	0	0	0	0	0	0	0	0	0	0
DTXCID104532, DTXCID104532	4-Methoxyaniline, 4-Methoxyaniline hydrochloride	104-94-9, 20265-97-8	COC1=CC=C(N)C=C1	InChI=1S/C7H9NO/c1-9-7-4-2-6(8)3-5-7/h2-5H,8H2,1H3	InChI=1S/C7H9NO/c1-9-7-4-2-6(8)3-5-7/h2-5H,8H2,1H3	C7H9NO	123.068	125.197	124.228	124.331	Lite	0	1	1	0	0	0	0	0	0	0
DTXCID2024953	2-(Pyridin-4-yl)ethanol	5344-27-4	OCCC1=CC=NC=C1	InChI=1S/C7H9NO/c9-6-3-7-1-4-8-5-2-7/h1-2,4-5,9H,3,6H2	InChI=1S/C7H9NO/c9-6-3-7-1-4-8-5-2-7/h1-2,4-5,9H,3,6H2	C7H9NO	123.068	124.367	123.717	123.689	Lite	0	0	0	0	0	0	0	0	0	0
DTXCID204489	5-Amino-2-methylphenol	2835-95-2	CC1=C(O)C=C(N)C=C1	InChI=1S/C7H9NO/c1-5-2-3-6(8)4-7(5)9/h2-4,9H,8H2,1H3	InChI=1S/C7H9NO/c1-5-2-3-6(8)4-7(5)9/h2-4,9H,8H2,1H3	C7H9NO	123.068	124.52	123.492	123.613	Lite	0	0	0	0	0	0	0	0	0	0
DTXCID803877, DTXCID803877	2-Anisidine, 2-Methoxyaniline hydrochloride	90-04-0, 134-29-2	COC1=CC=CC=C1N	InChI=1S/C7H9NO/c1-9-7-5-3-2-4-6(7)8/h2-5H,8H2,1H3	InChI=1S/C7H9NO/c1-9-7-5-3-2-4-6(7)8/h2-5H,8H2,1H3	C7H9NO	123.068	123.678	122.865	122.708	Lite	0	0	0	0	0	0	0	0	0	0
DTXCID0021464	3,3'-Iminobispropanenitrile	111-94-4	N#CCCNCCC#N	InChI=1S/C6H9N3/c7-3-1-5-9-6-2-4-8/h9H,1-2,5-6H2	InChI=1S/C6H9N3/c7-3-1-5-9-6-2-4-8/h9H,1-2,5-6H2	C6H9N3	123.08	132.138	131.658	131.54	Lite	0	0	0	0	0	0	0	0	0	0
DTXCID902113	3,4-Dichloro-1-butene	760-23-6	ClCC(Cl)C=C	InChI=1/C4H6Cl2/c1-2-4(6)3-5/h2,4H,1,3H2	InChI=1/C4H6Cl2/c1-2-4(6)3-5/h2,4H,1,3H2	C4H6Cl2	123.985			103.163	Lite	0	0	0	0	0	0	0	0	0	0
DTXCID40494	Dimethyl methylphosphonate	756-79-6	COP(C)(=O)OC	InChI=1S/C3H9O3P/c1-5-7(3,4)6-2/h1-3H3	InChI=1S/C3H9O3P/c1-5-7(3,4)6-2/h1-3H3	C3H9O3P	124.029	121.277	120.486	120.274	Lite	0	0	0	0	0	0	0	0	0	0
DTXCID8018756	4-Fluorobenzaldehyde	459-57-4	FC1=CC=C(C=O)C=C1	InChI=1S/C7H5FO/c8-7-3-1-6(5-9)2-4-7/h1-5H	InChI=1S/C7H5FO/c8-7-3-1-6(5-9)2-4-7/h1-5H	C7H5FO	124.032	117.63	117.303	116.73	Lite	0	0	0	0	0	0	0	0	0	0
DTXCID0028163	4-Thiocresol	106-45-6	CC1=CC=C(S)C=C1	InChI=1S/C7H8S/c1-6-2-4-7(8)5-3-6/h2-5,8H,1H3	InChI=1S/C7H8S/c1-6-2-4-7(8)5-3-6/h2-5,8H,1H3	C7H8S	124.035			121.107	Lite	0	0	0	0	0	0	0	0	0	0
DTXCID6027135	2-Methylbenzenethiol	137-06-4	CC1=CC=CC=C1S	InChI=1S/C7H8S/c1-6-4-2-3-5-7(6)8/h2-5,8H,1H3	InChI=1S/C7H8S/c1-6-4-2-3-5-7(6)8/h2-5,8H,1H3	C7H8S	124.035			119.886	Lite	0	0	0	0	0	0	0	0	0	0
DTXCID003113	2-Methoxyphenol	90-05-1	COC1=C(O)C=CC=C1	InChI=1S/C7H8O2/c1-9-7-5-3-2-4-6(7)8/h2-5,8H,1H3	InChI=1S/C7H8O2/c1-9-7-5-3-2-4-6(7)8/h2-5,8H,1H3	C7H8O2	124.052	123.309	122.346	122.217	Lite	0	0	0	0	0	0	0	0	0	0
DTXCID005571	2-Methyl-1,3-benzenediol	608-25-3	CC1=C(O)C=CC=C1O	InChI=1S/C7H8O2/c1-5-6(8)3-2-4-7(5)9/h2-4,8-9H,1H3	InChI=1S/C7H8O2/c1-5-6(8)3-2-4-7(5)9/h2-4,8-9H,1H3	C7H8O2	124.052	123.12	122.472	121.954	Lite	0	0	0	0	0	0	0	0	0	0
DTXCID302012	3-Methoxyphenol	150-19-6	COC1=CC=CC(O)=C1	InChI=1S/C7H8O2/c1-9-7-4-2-3-6(8)5-7/h2-5,8H,1H3	InChI=1S/C7H8O2/c1-9-7-4-2-3-6(8)5-7/h2-5,8H,1H3	C7H8O2	124.052	123.326	124.207	123.991	Lite	0	0	0	0	0	0	0	0	0	0
DTXCID60828	4-Methoxyphenol	150-76-5	COC1=CC=C(O)C=C1	InChI=1S/C7H8O2/c1-9-7-4-2-6(8)3-5-7/h2-5,8H,1H3	InChI=1S/C7H8O2/c1-9-7-4-2-6(8)3-5-7/h2-5,8H,1H3	C7H8O2	124.052	126.234	124.108	124.027	Lite	0	0	0	0	0	0	0	0	0	0
DTXCID3024154	3,3'-Oxydipropionitrile	1656-48-0	N#CCCOCCC#N	InChI=1S/C6H8N2O/c7-3-1-5-9-6-2-4-8/h1-2,5-6H2	InChI=1S/C6H8N2O/c7-3-1-5-9-6-2-4-8/h1-2,5-6H2	C6H8N2O	124.064	127.895	127.827	127.269	Lite	0	0	0	0	0	0	0	0	0	0
DTXCID5023748	2,4-Diaminophenol dihydrochloride	137-09-7	Cl.Cl.NC1=CC=C(O)C(N)=C1	InChI=1S/C6H8N2O.2ClH/c7-4-1-2-6(9)5(8)3-4;;/h1-3,9H,7-8H2;2*1H	InChI=1S/C6H8N2O/c7-4-1-2-6(9)5(8)3-4/h1-3,9H,7-8H2	C6H8N2O	124.064	123.332	122.418	122.219	Lite	0	0	0	0	0	0	0	0	0	0
DTXCID50210450	6-Methylhepta-3,5-dien-2-one	1604-28-0	CC(C)=CC=CC(C)=O	InChI=1S/C8H12O/c1-7(2)5-4-6-8(3)9/h4-6H,1-3H3_x000D_	InChI=1S/C8H12O/c1-7(2)5-4-6-8(3)9/h4-6H,1-3H3	C8H12O	124.089	134.499	134.511	133.786	Lite	0	0	0	0	0	0	0	0	0	0
DTXCID801757	1-Ethynylcyclohexanol	78-27-3	OC1(CCCCC1)C#C	InChI=1S/C8H12O/c1-2-8(9)6-4-3-5-7-8/h1,9H,3-7H2	InChI=1S/C8H12O/c1-2-8(9)6-4-3-5-7-8/h1,9H,3-7H2	C8H12O	124.089	125.902	125.615	125.543	Lite	0	0	0	0	0	0	0	0	0	0
DTXCID4024488	1-Aminocyclohexanecarbonitrile	5496-10-06	NC1(CCCCC1)C#N	InChI=1S/C7H12N2/c8-6-7(9)4-2-1-3-5-7/h1-5,9H2	InChI=1S/C7H12N2/c8-6-7(9)4-2-1-3-5-7/h1-5,9H2	C7H12N2	124.1	125.101	125.05	124.763	Lite	0	0	0	0	0	0	0	0	0	0
DTXCID5030248	2-Aminobenzenethiol	137-07-5	NC1=CC=CC=C1S	InChI=1S/C6H7NS/c7-5-3-1-2-4-6(5)8/h1-4,8H,7H2_x000D_	InChI=1S/C6H7NS/c7-5-3-1-2-4-6(5)8/h1-4,8H,7H2	C6H7NS	125.03	119.922	119.1	118.669	Lite	0	0	0	0	0	0	0	0	0	0
DTXCID40121248	4-Hydroxy-3-methoxypyridine	62885-41-0	COC1=C(O)C=CN=C1	InChI=1S/C6H7NO2/c1-9-6-4-7-3-2-5(6)8/h2-4H,1H3,(H,7,8)_x000D_	InChI=1S/C6H7NO2/c1-9-6-4-7-3-2-5(6)8/h2-4H,1H3,(H,7,8)	C6H7NO2	125.048	123.259	122.506	121.977	Lite	0	0	0	0	0	0	0	0	0	0
DTXCID605279	Ethyl cyanoacrylate	7085-85-0	CCOC(=O)C(=C)C#N	InChI=1S/C6H7NO2/c1-3-9-6(8)5(2)4-7/h2-3H2,1H3	InChI=1S/C6H7NO2/c1-3-9-6(8)5(2)4-7/h2-3H2,1H3	C6H7NO2	125.048	126.017	125.587	125.139	Lite	0	0	0	0	0	0	0	0	0	0
DTXCID9024776	2-Cyanoethyl prop-2-enoate	106-71-8	C=CC(=O)OCCC#N	InChI=1S/C6H7NO2/c1-2-6(8)9-5-3-4-7/h2H,1,3,5H2	InChI=1S/C6H7NO2/c1-2-6(8)9-5-3-4-7/h2H,1,3,5H2	C6H7NO2	125.048	126.818	126.42	125.965	Lite	0	0	0	0	0	0	0	0	0	0
DTXCID9083899	3-Hydroxy-2-(hydroxymethyl)pyridine hydrochloride	14173-30-9	Cl.OCC1=C(O)C=CC=N1	InChI=1S/C6H7NO2.ClH/c8-4-5-6(9)2-1-3-7-5;/h1-3,8-9H,4H2;1H_x000D_	InChI=1S/C6H7NO2/c8-4-5-6(9)2-1-3-7-5/h1-3,8-9H,4H2	C6H7NO2	125.048	122.885	122.394	122.423	Lite	0	0	0	0	0	0	0	0	0	0
DTXCID9027655	Octanenitrile	124-12-9	CCCCCCCC#N	InChI=1S/C8H15N/c1-2-3-4-5-6-7-8-9/h2-7H2,1H3	InChI=1S/C8H15N/c1-2-3-4-5-6-7-8-9/h2-7H2,1H3	C8H15N	125.12			132.981	Lite	0	0	0	0	0	0	0	0	0	0
DTXCID001577	1,3-Dichloropropanone	534-07-6	ClCC(=O)CCl	InChI=1S/C3H4Cl2O/c4-1-3(6)2-5/h1-2H2	InChI=1S/C3H4Cl2O/c4-1-3(6)2-5/h1-2H2	C3H4Cl2O	125.964	102.183	101.876	101.474	Lite	0	0	0	0	0	0	0	0	0	0
DTXCID904055	Dimethyl sulfate	77-78-1	COS(=O)(=O)OC	InChI=1S/C2H6O4S/c1-5-7(3,4)6-2/h1-2H3	InChI=1S/C2H6O4S/c1-5-7(3,4)6-2/h1-2H3	C2H6O4S	125.999	118.535	117.898	117.35	Lite	0	0	0	0	0	0	0	0	0	0
DTXCID205150	Dimethyl phosphate	813-78-5	COP(O)(=O)OC	InChI=1S/C2H7O4P/c1-5-7(3,4)6-2/h1-2H3,(H,3,4)	InChI=1S/C2H7O4P/c1-5-7(3,4)6-2/h1-2H3,(H,3,4)	C2H7O4P	126.008			118.672	Lite	0	0	0	0	0	0	0	0	0	0
DTXCID8027169	5-Methyl-2-thiophenecarboxaldehyde	13679-70-4	CC1=CC=C(S1)C=O	InChI=1S/C6H6OS/c1-5-2-3-6(4-7)8-5/h2-4H,1H3	InChI=1S/C6H6OS/c1-5-2-3-6(4-7)8-5/h2-4H,1H3	C6H6OS	126.014	120.247	119.628	119.23	Lite	0	0	0	0	0	0	0	0	0	0
DTXCID003977	2-Chlorotoluene	95-49-8	CC1=C(Cl)C=CC=C1	InChI=1S/C7H7Cl/c1-6-4-2-3-5-7(6)8/h2-5H,1H3	InChI=1S/C7H7Cl/c1-6-4-2-3-5-7(6)8/h2-5H,1H3	C7H7Cl	126.024			113.54	Lite	0	0	0	0	0	0	0	0	0	0
DTXCID607852	m-Chlorotoluene	108-41-8	CC1=CC(Cl)=CC=C1	InChI=1S/C7H7Cl/c1-6-3-2-4-7(8)5-6/h2-5H,1H3_x000D_	InChI=1S/C7H7Cl/c1-6-3-2-4-7(8)5-6/h2-5H,1H3	C7H7Cl	126.024			113.424	Lite	0	0	0	0	0	0	0	0	0	0
DTXCID904814	4-Chlorotoluene	106-43-4	CC1=CC=C(Cl)C=C1	InChI=1S/C7H7Cl/c1-6-2-4-7(8)5-3-6/h2-5H,1H3	InChI=1S/C7H7Cl/c1-6-2-4-7(8)5-3-6/h2-5H,1H3	C7H7Cl	126.024			113.329	Lite	0	0	0	0	0	0	0	0	0	0
DTXCID9027491	Pyrazinyl methyl sulfide	21948-70-9	CSC1=NC=CN=C1	InChI=1S/C5H6N2S/c1-8-5-4-6-2-3-7-5/h2-4H,1H3	InChI=1S/C5H6N2S/c1-8-5-4-6-2-3-7-5/h2-4H,1H3	C5H6N2S	126.025	121.125	120.345	120.082	Lite	0	0	0	0	0	0	0	0	0	0
DTXCID0028329	1,3,5-Trihydroxybenzene dihydrate	6099-90-7	O.O.OC1=CC(O)=CC(O)=C1	InChI=1S/C6H6O3.2H2O/c7-4-1-5(8)3-6(9)2-4;;/h1-3,7-9H;2*1H2	InChI=1S/C6H6O3/c7-4-1-5(8)3-6(9)2-4/h1-3,7-9H	C6H6O3	126.032	124.784	123.451	123.037	Lite	0	0	0	0	0	0	0	0	0	0
DTXCID1010428	5-(Hydroxymethyl)-2-furfural	67-47-0	OCC1=CC=C(O1)C=O	InChI=1S/C6H6O3/c7-3-5-1-2-6(4-8)9-5/h1-3,8H,4H2	InChI=1S/C6H6O3/c7-3-5-1-2-6(4-8)9-5/h1-3,8H,4H2	C6H6O3	126.032	124.902	124.862	124.817	Lite	0	0	0	0	1	0	0	0	0	1
DTXCID305523	Maltol	118-71-8	CC1=C(O)C(=O)C=CO1	InChI=1S/C6H6O3/c1-4-6(8)5(7)2-3-9-4/h2-3,8H,1H3	InChI=1S/C6H6O3/c1-4-6(8)5(7)2-3-9-4/h2-3,8H,1H3	C6H6O3	126.032	120.89	120.377	120.106	Lite	0	0	0	1	0	0	0	0	0	1
DTXCID701627	5-Methyl-2-furancarboxylic acid	1917-15-3	CC1=CC=C(O1)C(O)=O	InChI=1S/C6H6O3/c1-4-2-3-5(9-4)6(7)8/h2-3H,1H3,(H,7,8)	InChI=1S/C6H6O3/c1-4-2-3-5(9-4)6(7)8/h2-3H,1H3,(H,7,8)	C6H6O3	126.032	123.92	123.813	123.562	Lite	0	0	0	0	0	0	0	1	0	0
DTXCID4030914	Thymine	65-71-4	CC1=CNC(=O)NC1=O	InChI=1S/C5H6N2O2/c1-3-2-6-5(9)7-4(3)8/h2H,1H3,(H2,6,7,8,9)	InChI=1S/C5H6N2O2/c1-3-2-6-5(9)7-4(3)8/h2H,1H3,(H2,6,7,8,9)	C5H6N2O2	126.043	122.894	122.324	122.011	Lite	0	0	0	0	0	0	0	0	0	0
DTXCID9030880	6-Methyluracil	626-48-2	CC1=CC(=O)NC(=O)N1	InChI=1S/C5H6N2O2/c1-3-2-4(8)7-5(9)6-3/h2H,1H3,(H2,6,7,8,9)	InChI=1S/C5H6N2O2/c1-3-2-4(8)7-5(9)6-3/h2H,1H3,(H2,6,7,8,9)	C5H6N2O2	126.043	124.318	123.981	123.087	Lite	0	0	0	0	0	0	0	0	0	0
DTXCID401816	Allyl methacrylate	96-05-9	CC(=C)C(=O)OCC=C	InChI=1S/C7H10O2/c1-4-5-9-7(8)6(2)3/h4H,1-2,5H2,3H3	InChI=1S/C7H10O2/c1-4-5-9-7(8)6(2)3/h4H,1-2,5H2,3H3	C7H10O2	126.068	127.742	127.337	126.908	Lite	0	0	0	0	0	0	0	0	0	0
DTXCID7027675	3-Methylcyclohexane-1,2-dione	3008-43-3	CC1CCCC(=O)C1=O	InChI=1/C7H10O2/c1-5-3-2-4-6(8)7(5)9/h5H,2-4H2,1H3	InChI=1/C7H10O2/c1-5-3-2-4-6(8)7(5)9/h5H,2-4H2,1H3	C7H10O2	126.068	124.531	124.421	124.22	Lite	0	0	0	0	0	0	0	0	0	0
DTXCID8027660	3,5-Dimethyl-1,2-cyclopentanedione	13494-07-0	CC1CC(C)C(=O)C1=O	InChI=1/C7H10O2/c1-4-3-5(2)7(9)6(4)8/h4-5H,3H2,1-2H3	InChI=1/C7H10O2/c1-4-3-5(2)7(9)6(4)8/h4-5H,3H2,1-2H3	C7H10O2	126.068	125.582	125.494	125.056	Lite	0	0	0	0	0	0	0	0	0	0
DTXCID9012513	(3,5-Dimethyl-1H-pyrazol-1-yl)methanol	85264-33-1	CC1=NN(CO)C(C)=C1	InChI=1S/C6H10N2O/c1-5-3-6(2)8(4-9)7-5/h3,9H,4H2,1-2H3	InChI=1S/C6H10N2O/c1-5-3-6(2)8(4-9)7-5/h3,9H,4H2,1-2H3	C6H10N2O	126.079	127.005	126.307	126.014	Lite	0	0	0	0	0	0	0	0	0	0
DTXCID00911541	2-Ethyl-2-hexenal	645-62-5	CCCC=C(CC)C=O	InChI=1S/C8H14O/c1-3-5-6-8(4-2)7-9/h6-7H,3-5H2,1-2H3	InChI=1S/C8H14O/c1-3-5-6-8(4-2)7-9/h6-7H,3-5H2,1-2H3	C8H14O	126.105	133.108	131.974	131.803	Lite	0	0	0	0	0	0	0	0	0	0
DTXCID30210190	2-Octen-4-one	4643-27-0	CCCCC(=O)C=CC	InChI=1S/C8H14O/c1-3-5-7-8(9)6-4-2/h4,6H,3,5,7H2,1-2H3	InChI=1S/C8H14O/c1-3-5-7-8(9)6-4-2/h4,6H,3,5,7H2,1-2H3	C8H14O	126.105	133.818	133.591	133.288	Lite	0	0	0	0	0	0	0	0	0	0
DTXCID3027162	1-Octen-3-one	4312-99-6	CCCCCC(=O)C=C	InChI=1S/C8H14O/c1-3-5-6-7-8(9)4-2/h4H,2-3,5-7H2,1H3	InChI=1S/C8H14O/c1-3-5-6-7-8(9)4-2/h4H,2-3,5-7H2,1H3	C8H14O	126.105	131.965	131.619	131.445	Lite	0	0	0	0	0	0	0	0	0	0
DTXCID4021472	3,5-Dimethyl-1-hexyn-3-ol	107-54-0	CC(C)CC(C)(O)C#C	InChI=1/C8H14O/c1-5-8(4,9)6-7(2)3/h1,7,9H,6H2,2-4H3	InChI=1/C8H14O/c1-5-8(4,9)6-7(2)3/h1,7,9H,6H2,2-4H3	C8H14O	126.105	132.022	131.237	130.988	Lite	0	0	0	0	0	0	0	0	0	0
DTXCID501629	6-Methyl-5-hepten-2-one	110-93-0	CC(C)=CCCC(C)=O	InChI=1S/C8H14O/c1-7(2)5-4-6-8(3)9/h5H,4,6H2,1-3H3	InChI=1S/C8H14O/c1-7(2)5-4-6-8(3)9/h5H,4,6H2,1-3H3	C8H14O	126.105	133.343	132.393	132.298	Lite	0	0	0	0	0	0	0	0	0	0
DTXCID305086	Diisopropylcarbodiimide	693-13-0	CC(C)N=C=NC(C)C	InChI=1S/C7H14N2/c1-6(2)8-5-9-7(3)4/h6-7H,1-4H3	InChI=1S/C7H14N2/c1-6(2)8-5-9-7(3)4/h6-7H,1-4H3	C7H14N2	126.116	133.508	133.655	133.273	Lite	0	0	0	0	0	0	0	0	0	0
DTXCID5024899	2-Amino-2,4-dimethylpentanenitrile	26842-43-3	CC(C)CC(C)(N)C#N	InChI=1/C7H14N2/c1-6(2)4-7(3,9)5-8/h6H,4,9H2,1-3H3	InChI=1/C7H14N2/c1-6(2)4-7(3,9)5-8/h6H,4,9H2,1-3H3	C7H14N2	126.116	130.546	130.132	130.312	Lite	0	0	0	0	0	0	0	0	0	0
NoDTXCID18	Copper Omadine	14915-37-8	[O-]1N2C=CC=CC2=[S][Cu++]11[O-]N2C=CC=CC2=[S]1	InChI=1S/2C5H4NOS.Cu/c2*7-6-4-2-1-3-5(6)8;/h2*1-4H;/q2*-1;+2_x000D_	InChI=1S/C5H5NOS/c7-6-4-2-1-3-5(6)8/h1-4,7H	C5H5NOS	127.009	118.876	118.309	117.978	Lite	0	0	0	0	0	0	0	0	0	0
NoDTXCID19, DTXCID0027987	Zinc pyrithione, Sodium (2-pyridylthio)-N-oxide	13463-41-7, 3811-73-2	[O-]1N2C=CC=CC2=[S][Zn++]11[O-]N2C=CC=CC2=[S]1	InChI=1S/2C5H5NOS.Zn/c2*7-6-4-2-1-3-5(6)8;/h2*1-4,8H;/q;;+2/p-2	InChI=1S/C5H5NOS/c7-6-4-2-1-3-5(6)8/h1-4,8H	C5H5NOS	127.009	119.012	118.101	117.702	Lite	0	0	0	0	0	0	0	0	0	0
DTXCID8010162	2-Acetylthiazole	24295-03-2	CC(=O)C1=NC=CS1	InChI=1S/C5H5NOS/c1-4(7)5-6-2-3-8-5/h2-3H,1H3	InChI=1S/C5H5NOS/c1-4(7)5-6-2-3-8-5/h2-3H,1H3	C5H5NOS	127.009	118.024	117.365	117.143	Lite	0	0	0	0	0	0	0	0	0	0
DTXCID0023824	2-(Chloromethyl)pyridine hydrochloride	6959-47-3	Cl.ClCC1=NC=CC=C1	InChI=1S/C6H6ClN.ClH/c7-5-6-3-1-2-4-8-6;/h1-4H,5H2;1H	InChI=1S/C6H6ClN/c7-5-6-3-1-2-4-8-6/h1-4H,5H2	C6H6ClN	127.019	113.891	113.261	112.762	Lite	0	0	0	0	0	0	0	0	0	0
DTXCID004761	3-Chloroaniline	108-42-9	NC1=CC(Cl)=CC=C1	InChI=1S/C6H6ClN/c7-5-2-1-3-6(8)4-5/h1-4H,8H2	InChI=1S/C6H6ClN/c7-5-2-1-3-6(8)4-5/h1-4H,8H2	C6H6ClN	127.019	113.612	112.587	112.228	Lite	0	0	0	0	0	0	0	1	0	1
DTXCID5023825	3-(Chloromethyl)pyridine hydrochloride	6959-48-4	Cl.ClCC1=CC=CN=C1	InChI=1S/C6H6ClN.ClH/c7-4-6-2-1-3-8-5-6;/h1-3,5H,4H2;1H	InChI=1S/C6H6ClN/c7-4-6-2-1-3-8-5-6/h1-3,5H,4H2	C6H6ClN	127.019	113.676	113.324	112.791	Lite	0	0	0	0	0	0	0	0	0	0
DTXCID50295, DTXCID50295	4-Chloroaniline hydrochloride, 4-Chloroaniline	20265-96-7, 106-47-8	Cl.NC1=CC=C(Cl)C=C1	InChI=1S/C6H6ClN.ClH/c7-5-1-3-6(8)4-2-5;/h1-4H,8H2;1H	InChI=1S/C6H6ClN/c7-5-1-3-6(8)4-2-5/h1-4H,8H2	C6H6ClN	127.019	113.424	112.461	112.199	Lite	0	0	0	0	0	1	1	0	0	1
DTXCID5030793	2-Amino-6-hydroxy-1H-pyrimidin-4-one	56-09-7	NC1=NC(=O)CC(=O)N1	InChI=1S/C4H5N3O2/c5-4-6-2(8)1-3(9)7-4/h1H2,(H3,5,6,7,8,9)_x000D_	InChI=1S/C4H5N3O2/c5-4-6-2(8)1-3(9)7-4/h1H2,(H3,5,6,7,8,9)	C4H5N3O2	127.038	122.677	121.888	121.833	Lite	0	0	0	0	0	0	0	0	0	0
DTXCID9020114	tert-Butylacrylamide	107-58-4	CC(C)(C)NC(=O)C=C	InChI=1S/C7H13NO/c1-5-6(9)8-7(2,3)4/h5H,1H2,2-4H3,(H,8,9)	InChI=1S/C7H13NO/c1-5-6(9)8-7(2,3)4/h5H,1H2,2-4H3,(H,8,9)	C7H13NO	127.1	130.031	129.38	129.263	Lite	0	0	0	0	0	0	0	0	0	0
DTXCID906633	N,N-Dimethylcyclohexylamine	98-94-2	CN(C)C1CCCCC1	InChI=1S/C8H17N/c1-9(2)8-6-4-3-5-7-8/h8H,3-7H2,1-2H3	InChI=1S/C8H17N/c1-9(2)8-6-4-3-5-7-8/h8H,3-7H2,1-2H3	C8H17N	127.136	127.401	126.463	126.303	Lite	0	0	0	0	0	0	0	0	0	0
DTXCID20428, DTXCID20428	Sodium dichloroacetate, Dichloroacetic acid	2156-56-1, 79-43-6	[Na+].[O-]C(=O)C(Cl)Cl	InChI=1S/C2H2Cl2O2.Na/c3-1(4)2(5)6;/h1H,(H,5,6);/q;+1/p-1	InChI=1S/C2H2Cl2O2/c3-1(4)2(5)6/h1H,(H,5,6)	C2H2Cl2O2	127.943			99.8219	Lite	0	0	0	0	0	0	0	0	0	0
DTXCID805010	1,3-Dichloro-2-propanol	96-23-1	OC(CCl)CCl	InChI=1S/C3H6Cl2O/c4-1-3(6)2-5/h3,6H,1-2H2	InChI=1S/C3H6Cl2O/c4-1-3(6)2-5/h3,6H,1-2H2	C3H6Cl2O	127.98	103.943	103.299	103.154	Lite	0	0	0	0	0	0	0	0	0	0
DTXCID201871	4-Chlorophenol	106-48-9	OC1=CC=C(Cl)C=C1	InChI=1S/C6H5ClO/c7-5-1-3-6(8)4-2-5/h1-4,8H	InChI=1S/C6H5ClO/c7-5-1-3-6(8)4-2-5/h1-4,8H	C6H5ClO	128.003	113.027	112.158	112.03	Lite	1	0	0	0	1	0	1	0	1	0
DTXCID901544	2-Chlorophenol	95-57-8	OC1=CC=CC=C1Cl	InChI=1S/C6H5ClO/c7-5-3-1-2-4-6(5)8/h1-4,8H	InChI=1S/C6H5ClO/c7-5-3-1-2-4-6(5)8/h1-4,8H	C6H5ClO	128.003	112.934	112.362	112.106	Lite	0	0	0	0	0	0	0	0	0	0
DTXCID701347	Thiouracil	141-90-2	O=C1NC(=S)NC=C1	InChI=1S/C4H4N2OS/c7-3-1-2-5-4(8)6-3/h1-2H,(H2,5,6,7,8)	InChI=1S/C4H4N2OS/c7-3-1-2-5-4(8)6-3/h1-2H,(H2,5,6,7,8)	C4H4N2OS	128.004	119.155	118.675	118.064	Lite	0	1	0	0	0	0	0	0	1	0
DTXCID207259	1,3-Benzenedicarbonitrile	626-17-5	N#CC1=CC(=CC=C1)C#N	InChI=1S/C8H4N2/c9-5-7-2-1-3-8(4-7)6-10/h1-4H	InChI=1S/C8H4N2/c9-5-7-2-1-3-8(4-7)6-10/h1-4H	C8H4N2	128.037			128.745	Lite	0	0	0	0	0	0	0	0	0	0
DTXCID2027674	4,5-Dimethyl-3-hydroxy-2,5-dihydrofuran-2-one	28664-35-9	CC1OC(=O)C(O)=C1C	InChI=1/C6H8O3/c1-3-4(2)9-6(8)5(3)7/h4,7H,1-2H3	InChI=1/C6H8O3/c1-3-4(2)9-6(8)5(3)7/h3-4H,1-2H3	C6H8O3	128.047	123.483	123.339	123.238	Lite	0	0	0	0	0	0	0	0	0	0
DTXCID4024436	3-Acetyldihydro-2(3H)-furanone	517-23-7	CC(=O)C1CCOC1=O	InChI=1/C6H8O3/c1-4(7)5-2-3-9-6(5)8/h5H,2-3H2,1H3	InChI=1/C6H8O3/c1-4(7)5-2-3-9-6(5)8/h5H,2-3H2,1H3	C6H8O3	128.047	123.172	122.851	122.759	Lite	0	0	0	0	0	0	0	0	0	0
DTXCID8021517	4-Hydroxy-2,5-dimethyl-3(2H)furanone	3658-77-3	CC1OC(C)=C(O)C1=O	InChI=1/C6H8O3/c1-3-5(7)6(8)4(2)9-3/h3,8H,1-2H3	InChI=1/C6H8O3/c1-3-5(7)6(8)4(2)9-3/h3-4H,1-2H3	C6H8O3	128.047	124.9	124.502	124.029	Lite	0	0	0	0	0	0	0	0	0	0
DTXCID601754	5,5-Dimethylhydantoin	77-71-4	CC1(C)NC(=O)NC1=O	InChI=1S/C5H8N2O2/c1-5(2)3(8)6-4(9)7-5/h1-2H3,(H2,6,7,8,9)	InChI=1S/C5H8N2O2/c1-5(2)3(8)6-4(9)7-5/h1-2H3,(H2,6,7,8,9)	C5H8N2O2	128.059	123.061	123.387	122.291	Lite	0	0	0	0	0	0	0	0	0	0
DTXCID00913	Naphthalene	91-20-3	C1=CC2=CC=CC=C2C=C1	InChI=1S/C10H8/c1-2-6-10-8-4-3-7-9(10)5-1/h1-8H	InChI=1S/C10H8/c1-2-6-10-8-4-3-7-9(10)5-1/h1-8H	C10H8	128.063			123.422	Lite	0	0	0	0	0	0	0	0	0	0
DTXCID104676	Butyl acrylate	141-32-2	CCCCOC(=O)C=C	InChI=1S/C7H12O2/c1-3-5-6-9-7(8)4-2/h4H,2-3,5-6H2,1H3	InChI=1S/C7H12O2/c1-3-5-6-9-7(8)4-2/h4H,2-3,5-6H2,1H3	C7H12O2	128.084	128.85	128.612	127.966	Lite	0	0	0	0	0	0	0	0	0	0
DTXCID3027611	1,4-Heptanolide	105-21-5	CCCC1CCC(=O)O1	InChI=1/C7H12O2/c1-2-3-6-4-5-7(8)9-6/h6H,2-5H2,1H3	InChI=1/C7H12O2/c1-2-3-6-4-5-7(8)9-6/h6H,2-5H2,1H3	C7H12O2	128.084	126.199	126.062	125.542	Lite	0	0	0	0	0	0	0	0	0	0
DTXCID7027128	3,3-Dimethylallyl acetate	1191-16-8	CC(C)=CCOC(C)=O	InChI=1S/C7H12O2/c1-6(2)4-5-9-7(3)8/h4H,5H2,1-3H3	InChI=1S/C7H12O2/c1-6(2)4-5-9-7(3)8/h4H,5H2,1-3H3	C7H12O2	128.084	131.343	130.521	130.413	Lite	0	0	0	0	0	0	0	0	0	0
DTXCID301040	N-Nitrosohexamethyleneimine	932-83-2	O=NN1CCCCCC1	InChI=1S/C6H12N2O/c9-7-8-5-3-1-2-4-6-8/h1-6H2	InChI=1S/C6H12N2O/c9-7-8-5-3-1-2-4-6-8/h1-6H2	C6H12N2O	128.095	126.182	124.367	124.145	Lite	0	0	0	0	0	0	0	0	0	0
DTXCID005291	2-Ethylhexanal	123-05-7	CCCCC(CC)C=O	InChI=1/C8H16O/c1-3-5-6-8(4-2)7-9/h7-8H,3-6H2,1-2H3	InChI=1/C8H16O/c1-3-5-6-8(4-2)7-9/h7-8H,3-6H2,1-2H3	C8H16O	128.12	133.087	132.77	132.668	Lite	0	0	0	0	0	0	0	0	0	0
DTXCID1015214	1-Octen-3-ol	3391-86-4	CCCCCC(O)C=C	InChI=1/C8H16O/c1-3-5-6-7-8(9)4-2/h4,8-9H,2-3,5-7H2,1H3	InChI=1/C8H16O/c1-3-5-6-7-8(9)4-2/h4,8-9H,2-3,5-7H2,1H3	C8H16O	128.12	133.495	132.78	132.826	Lite	0	0	0	0	0	0	0	0	0	0
DTXCID1021954	3-Octanone	106-68-3	CCCCCC(=O)CC	InChI=1S/C8H16O/c1-3-5-6-7-8(9)4-2/h3-7H2,1-2H3	InChI=1S/C8H16O/c1-3-5-6-7-8(9)4-2/h3-7H2,1-2H3	C8H16O	128.12	132.491	132.745	133.038	Lite	0	0	0	0	0	0	0	0	0	0
DTXCID50210258	(Z)-5-Octen-1-ol	64275-73-6	CC\C=C/CCCCO	InChI=1S/C8H16O/c1-2-3-4-5-6-7-8-9/h3-4,9H,2,5-8H2,1H3/b4-3-	InChI=1S/C8H16O/c1-2-3-4-5-6-7-8-9/h3-4,9H,2,5-8H2,1H3/b4-3-	C8H16O	128.12	136.041	135.293	135.398	Lite	0	0	0	0	0	0	0	0	0	0
DTXCID5027643	1-Cyclohexylethanol	1193-81-3	CC(O)C1CCCCC1	InChI=1/C8H16O/c1-7(9)8-5-3-2-4-6-8/h7-9H,2-6H2,1H3	InChI=1/C8H16O/c1-7(9)8-5-3-2-4-6-8/h7-9H,2-6H2,1H3	C8H16O	128.12	126.37	125.628	125.701	Lite	0	0	0	0	0	0	0	0	0	0
DTXCID701643	Octanal	124-13-0	CCCCCCCC=O	InChI=1S/C8H16O/c1-2-3-4-5-6-7-8-9/h8H,2-7H2,1H3	InChI=1S/C8H16O/c1-2-3-4-5-6-7-8-9/h8H,2-7H2,1H3	C8H16O	128.12	133.817	133.441	133.247	Lite	0	0	0	0	0	0	0	0	0	0
DTXCID7021813	4-Methylcyclohexanemethanol	34885-03-5	CC1CCC(CO)CC1	InChI=1S/C8H16O/c1-7-2-4-8(6-9)5-3-7/h7-9H,2-6H2,1H3	InChI=1S/C8H16O/c1-7-2-4-8(6-9)5-3-7/h7-9H,2-6H2,1H3	C8H16O	128.12	128.257	127.81	127.539	Lite	0	0	0	0	0	0	0	0	0	0
DTXCID7027047	5-Methyl-3-heptanone	541-85-5	CCC(C)CC(=O)CC	InChI=1/C8H16O/c1-4-7(3)6-8(9)5-2/h7H,4-6H2,1-3H3	InChI=1/C8H16O/c1-4-7(3)6-8(9)5-2/h7H,4-6H2,1-3H3	C8H16O	128.12	134.544	133.804	133.876	Lite	0	0	0	0	0	0	0	0	0	0
DTXCID7030309	6-Methylhept-5-en-2-ol	1569-60-4	CC(O)CCC=C(C)C	InChI=1/C8H16O/c1-7(2)5-4-6-8(3)9/h5,8-9H,4,6H2,1-3H3	InChI=1/C8H16O/c1-7(2)5-4-6-8(3)9/h5,8-9H,4,6H2,1-3H3	C8H16O	128.12	134.972	134.491	134.432	Lite	0	0	0	0	0	0	0	0	0	0
DTXCID005796	Nonane	111-84-2	CCCCCCCCC	InChI=1S/C9H20/c1-3-5-7-9-8-6-4-2/h3-9H2,1-2H3	InChI=1S/C9H20/c1-3-5-7-9-8-6-4-2/h3-9H2,1-2H3	C9H20	128.156				NA	0	0	0	0	0	0	0	0	0	0
DTXCID8021513	4-Chloropyridine 1-oxide	1121-76-2	[O-][N+]1=CC=C(Cl)C=C1	InChI=1S/C5H4ClNO/c6-5-1-3-7(8)4-2-5/h1-4H	InChI=1S/C5H4ClNO/c6-5-1-3-7(8)4-2-5/h1-4H	C5H4ClNO	128.998	112.314	111.465	110.812	Lite	0	0	0	0	0	0	0	0	0	0
DTXCID304873	Cyanuric acid	108-80-5	OC1=NC(O)=NC(O)=N1	InChI=1S/C3H3N3O3/c7-1-4-2(8)6-3(9)5-1/h(H3,4,5,6,7,8,9)	InChI=1S/C3H3N3O3/c7-1-4-2(8)6-3(9)5-1/h(H3,4,5,6,7,8,9)	C3H3N3O3	129.017	122.413	122.045	121.149	Lite	0	0	0	0	0	0	0	0	0	0
DTXCID30196622	DL-Goitrin	13190-34-6	C=CC1CNC(=S)O1	InChI=1S/C5H7NOS/c1-2-4-3-6-5(8)7-4/h2,4H,1,3H2,(H,6,8)_x000D_	InChI=1/C5H7NOS/c1-2-4-3-6-5(8)7-4/h2,4H,1,3H2,(H,6,8)	C5H7NOS	129.025	122.152	122.317	121.568	Lite	0	0	0	0	0	0	0	0	0	0
DTXCID0027644	Isoquinoline	119-65-3	C1=CC2=C(C=C1)C=NC=C2	InChI=1S/C9H7N/c1-2-4-9-7-10-6-5-8(9)3-1/h1-7H	InChI=1S/C9H7N/c1-2-4-9-7-10-6-5-8(9)3-1/h1-7H	C9H7N	129.058	123.577	122.976	122.746	Lite	0	0	0	0	0	0	0	0	0	0
DTXCID401798	Quinoline	91-22-5	C1=CC2=C(C=C1)N=CC=C2	InChI=1S/C9H7N/c1-2-6-9-8(4-1)5-3-7-10-9/h1-7H	InChI=1S/C9H7N/c1-2-6-9-8(4-1)5-3-7-10-9/h1-7H	C9H7N	129.058	123.585	123.071	122.528	Lite	0	0	0	0	0	0	0	0	0	0
DTXCID6024385, DTXCID70911770	(2E)-3-Phenylprop-2-enenitrile, 3-Phenylprop-2-enenitrile	1885-38-7, 4360-47-8	N#C\C=C\C1=CC=CC=C1	InChI=1S/C9H7N/c10-8-4-7-9-5-2-1-3-6-9/h1-7H/b7-4+	InChI=1S/C9H7N/c10-8-4-7-9-5-2-1-3-6-9/h1-7H	C9H7N	129.058			128.966	Lite	0	0	0	0	0	0	0	0	0	0
DTXCID5024922	1-(2-Hydroxyethyl)pyrrolidin-2-one	3445-11-02	OCCN1CCCC1=O	InChI=1S/C6H11NO2/c8-5-4-7-3-1-2-6(7)9/h8H,1-5H2	InChI=1S/C6H11NO2/c8-5-4-7-3-1-2-6(7)9/h8H,1-5H2	C6H11NO2	129.079	125.992	125.455	125.202	Lite	0	0	0	1	0	0	0	0	0	1
DTXCID607454	N,N-Dimethylacetoacetamide	2044-64-6	CN(C)C(=O)CC(C)=O	InChI=1S/C6H11NO2/c1-5(8)4-6(9)7(2)3/h4H2,1-3H3	InChI=1S/C6H11NO2/c1-5(8)4-6(9)7(2)3/h4H2,1-3H3	C6H11NO2	129.079	129.143	128.638	128.822	Lite	0	0	1	0	0	0	0	0	0	1
DTXCID1024706	1-(2-Aminoethyl)imidazolidin-2-one	6281-42-1	NCCN1CCNC1=O	InChI=1S/C5H11N3O/c6-1-3-8-4-2-7-5(8)9/h1-4,6H2,(H,7,9)	InChI=1S/C5H11N3O/c6-1-3-8-4-2-7-5(8)9/h1-4,6H2,(H,7,9)	C5H11N3O	129.09	125.622	125.628	125.078	Lite	0	0	0	0	0	0	0	0	0	0
DTXCID803270	Metformin	657-24-9	CN(C)C(=N)NC(N)=N	InChI=1S/C4H11N5/c1-9(2)4(7)8-3(5)6/h1-2H3,(H5,5,6,7,8)	InChI=1S/C4H11N5/c1-9(2)4(7)8-3(5)6/h1-2H3,(H5,5,6,7,8)	C4H11N5	129.101	126.549	125.934	125.845	Lite	0	0	0	0	0	0	0	0	0	0
DTXCID1024837	2-(Piperidin-2-yl)ethanol	1484-84-0	OCCC1CCCCN1	InChI=1/C7H15NO/c9-6-4-7-3-1-2-5-8-7/h7-9H,1-6H2	InChI=1/C7H15NO/c9-6-4-7-3-1-2-5-8-7/h7-9H,1-6H2	C7H15NO	129.115	127.405	126.908	126.981	Lite	0	0	0	0	0	0	0	0	0	0
DTXCID0030112	Hexahydro-1,3,5-trimethyl-1,3,5-triazine	108-74-7	CN1CN(C)CN(C)C1	InChI=1S/C6H15N3/c1-7-4-8(2)6-9(3)5-7/h4-6H2,1-3H3	InChI=1S/C6H15N3/c1-7-4-8(2)6-9(3)5-7/h4-6H2,1-3H3	C6H15N3	129.127	125.038	125.249	125.031	Lite	0	0	0	0	0	0	0	0	0	0
DTXCID401997	1-(2-Aminoethyl)piperazine	140-31-8	NCCN1CCNCC1	InChI=1S/C6H15N3/c7-1-4-9-5-2-8-3-6-9/h8H,1-7H2	InChI=1S/C6H15N3/c7-1-4-9-5-2-8-3-6-9/h8H,1-7H2	C6H15N3	129.127	127.399	126.735	126.342	Lite	0	0	0	0	0	0	0	0	0	0
DTXCID805599	Methylene bis(thiocyanate)	6317-18-6	N#CSCSC#N	InChI=1S/C3H2N2S2/c4-1-6-3-7-2-5/h3H2	InChI=1S/C3H2N2S2/c4-1-6-3-7-2-5/h3H2	C3H2N2S2	129.966			121.339	Lite	0	0	0	0	0	0	0	0	0	0
DTXCID40634	5-Fluorouracil	51-21-8	FC1=CNC(=O)NC1=O	InChI=1S/C4H3FN2O2/c5-2-1-6-4(9)7-3(2)8/h1H,(H2,6,7,8,9)	InChI=1S/C4H3FN2O2/c5-2-1-6-4(9)7-3(2)8/h1H,(H2,6,7,8,9)	C4H3FN2O2	130.018	116.895	116.591	115.886	Lite	0	0	0	0	0	0	0	0	0	0
DTXCID006608	Methylenebutanedioic acid	97-65-4	OC(=O)CC(=C)C(O)=O	InChI=1S/C5H6O4/c1-3(5(8)9)2-4(6)7/h1-2H2,(H,6,7)(H,8,9)	InChI=1S/C5H6O4/c1-3(5(8)9)2-4(6)7/h1-2H2,(H,6,7)(H,8,9)	C5H6O4	130.027			124.083	Lite	0	0	0	0	0	0	0	0	0	0
DTXCID30209463	2-Butenedioic acid (2Z)-, monomethyl ester	3052-50-4	COC(=O)\C=C/C(O)=O	InChI=1S/C5H6O4/c1-9-5(8)3-2-4(6)7/h2-3H,1H3,(H,6,7)/b3-2-	InChI=1S/C5H6O4/c1-9-5(8)3-2-4(6)7/h2-3H,1H3,(H,6,7)/b3-2-	C5H6O4	130.027	127.778	126.173	125.911	Lite	0	0	0	0	0	0	0	0	0	0
DTXCID2024903, DTXCID6024622	Titanium(4+) bis[(2E)-4-oxohex-2-en-2-olate] dipropan-2-olate, Aluminum butan-2-olate (2Z)-4-ethoxy-4-oxobut-2-en-2-olate (1:2:1)	27858-32-8, 24772-51-8	CCOC(=O)\C=C(/C)O[Ti](OC(C)C)(OC(C)C)O\C(C)=C\C(=O)OCC	InChI=1S/2C6H10O3.2C3H7O.Ti/c2*1-3-9-6(8)4-5(2)7;2*1-3(2)4;/h2*4,7H,3H2,1-2H3;2*3H,1-2H3;/q;;2*-1;+4/p-2/b2*5-4+;;;	InChI=1S/C6H10O3/c1-3-9-6(8)4-5(2)7/h3-4H2,1-2H3	C6H10O3	130.063	128.607	127.961	127.78	Lite	0	0	0	0	0	0	0	0	0	0
DTXCID207314	3,3-Dimethyl-2-oxobutyric acid	815-17-8	CC(C)(C)C(=O)C(O)=O	InChI=1S/C6H10O3/c1-6(2,3)4(7)5(8)9/h1-3H3,(H,8,9)	InChI=1S/C6H10O3/c1-6(2,3)4(7)5(8)9/h1-3H3,(H,8,9)	C6H10O3	130.063	126.532	125.882	125.866	Lite	0	0	0	0	0	0	0	0	0	0
DTXCID005453	3-Methylbutyl acetate	123-92-2	CC(C)CCOC(C)=O	InChI=1S/C7H14O2/c1-6(2)4-5-9-7(3)8/h6H,4-5H2,1-3H3	InChI=1S/C7H14O2/c1-6(2)4-5-9-7(3)8/h6H,4-5H2,1-3H3	C7H14O2	130.099	130.443	130.088	129.914	Lite	0	0	0	0	0	0	0	0	0	0
DTXCID1027057	Ethyl isovalerate	108-64-5	CCOC(=O)CC(C)C	InChI=1S/C7H14O2/c1-4-9-7(8)5-6(2)3/h6H,4-5H2,1-3H3	InChI=1S/C7H14O2/c1-4-9-7(8)5-6(2)3/h6H,4-5H2,1-3H3	C7H14O2	130.099	130.804	130.099	129.889	Lite	0	0	0	0	0	0	0	0	0	0
DTXCID107263	Pentyl acetate	628-63-7	CCCCCOC(C)=O	InChI=1S/C7H14O2/c1-3-4-5-6-9-7(2)8/h3-6H2,1-2H3	InChI=1S/C7H14O2/c1-3-4-5-6-9-7(2)8/h3-6H2,1-2H3	C7H14O2	130.099	131.07	130.53	130.239	Lite	0	0	0	0	0	0	0	0	0	0
DTXCID301600	Heptanoic acid	111-14-8	CCCCCCC(O)=O	InChI=1S/C7H14O2/c1-2-3-4-5-6-7(8)9/h2-6H2,1H3,(H,8,9)	InChI=1S/C7H14O2/c1-2-3-4-5-6-7(8)9/h2-6H2,1H3,(H,8,9)	C7H14O2	130.099			130.497	Lite	0	0	0	0	0	0	0	0	0	0
DTXCID4031061	Ethyl 2-methylbutyrate	7452-79-1	CCOC(=O)C(C)CC	InChI=1S/C7H14O2/c1-4-6(3)7(8)9-5-2/h6H,4-5H2,1-3H3_x000D_	InChI=1/C7H14O2/c1-4-6(3)7(8)9-5-2/h6H,4-5H2,1-3H3	C7H14O2	130.099	131.997	131.697	131.669	Lite	0	0	0	0	0	0	0	0	0	0
DTXCID6024252	5-Methylhexanoic acid	628-46-6	CC(C)CCCC(O)=O	InChI=1S/C7H14O2/c1-6(2)4-3-5-7(8)9/h6H,3-5H2,1-2H3,(H,8,9)	InChI=1S/C7H14O2/c1-6(2)4-3-5-7(8)9/h6H,3-5H2,1-2H3,(H,8,9)	C7H14O2	130.099			129.749	Lite	0	0	0	0	0	0	0	0	0	0
DTXCID7024241	2-Methylhexanoic acid	4536-23-6	CCCCC(C)C(O)=O	InChI=1/C7H14O2/c1-3-4-5-6(2)7(8)9/h6H,3-5H2,1-2H3,(H,8,9)	InChI=1/C7H14O2/c1-3-4-5-6(2)7(8)9/h6H,3-5H2,1-2H3,(H,8,9)	C7H14O2	130.099			130.302	Lite	0	0	0	0	0	0	0	0	0	0
DTXCID704691	Butyl glycidyl ether	2426-08-06	CCCCOCC1CO1	InChI=1/C7H14O2/c1-2-3-4-8-5-7-6-9-7/h7H,2-6H2,1H3	InChI=1/C7H14O2/c1-2-3-4-8-5-7-6-9-7/h7H,2-6H2,1H3	C7H14O2	130.099	130.449	130.009	129.67	Lite	0	0	0	0	0	0	0	0	0	0
DTXCID8030396	2-Ethyl-2-methylbutyric acid	19889-37-3	CCC(C)(CC)C(O)=O	InChI=1S/C7H14O2/c1-4-7(3,5-2)6(8)9/h4-5H2,1-3H3,(H,8,9)_x000D_	InChI=1S/C7H14O2/c1-4-7(3,5-2)6(8)9/h4-5H2,1-3H3,(H,8,9)	C7H14O2	130.099			127.031	Lite	0	0	0	0	0	0	0	0	0	0
DTXCID805557	4-Methoxy-4-methyl-2-pentanone	107-70-0	COC(C)(C)CC(C)=O	InChI=1S/C7H14O2/c1-6(8)5-7(2,3)9-4/h5H2,1-4H3	InChI=1S/C7H14O2/c1-6(8)5-7(2,3)9-4/h5H2,1-4H3	C7H14O2	130.099	129.811	128.862	128.921	Lite	0	0	0	0	0	0	0	0	0	0
DTXCID2024408	2-Morpholinoethylamine	2038-03-01	NCCN1CCOCC1	InChI=1S/C6H14N2O/c7-1-2-8-3-5-9-6-4-8/h1-7H2	InChI=1S/C6H14N2O/c7-1-2-8-3-5-9-6-4-8/h1-7H2	C6H14N2O	130.111	127.703	127.07	126.66	Lite	0	0	0	0	0	0	0	0	0	0
DTXCID401853	1-Piperazineethanol	103-76-4	OCCN1CCNCC1	InChI=1S/C6H14N2O/c9-6-5-8-3-1-7-2-4-8/h7,9H,1-6H2	InChI=1S/C6H14N2O/c9-6-5-8-3-1-7-2-4-8/h7,9H,1-6H2	C6H14N2O	130.111	126.45	126.316	126.235	Lite	0	0	0	0	0	0	0	0	0	0
DTXCID801032	N-Nitrosodipropylamine	621-64-7	CCCN(CCC)N=O	InChI=1S/C6H14N2O/c1-3-5-8(7-9)6-4-2/h3-6H2,1-2H3	InChI=1S/C6H14N2O/c1-3-5-8(7-9)6-4-2/h3-6H2,1-2H3	C6H14N2O	130.111	131.875	130.353	130.161	Lite	0	0	0	0	0	0	0	0	0	0
DTXCID101940	1-Octanol	111-87-5	CCCCCCCCO	InChI=1S/C8H18O/c1-2-3-4-5-6-7-8-9/h9H,2-8H2,1H3	InChI=1S/C8H18O/c1-2-3-4-5-6-7-8-9/h9H,2-8H2,1H3	C8H18O	130.136	134.508	134.52	134.48	Lite	0	0	0	0	0	0	0	0	0	0
DTXCID10605	2-Ethyl-1-hexanol	104-76-7	CCCCC(CC)CO	InChI=1/C8H18O/c1-3-5-6-8(4-2)7-9/h8-9H,3-7H2,1-2H3	InChI=1/C8H18O/c1-3-5-6-8(4-2)7-9/h8-9H,3-7H2,1-2H3	C8H18O	130.136	136.173	134.749	134.222	Lite	0	0	0	0	0	0	0	0	0	0
DTXCID607014	2-Octanol	123-96-6	CCCCCCC(C)O	InChI=1/C8H18O/c1-3-4-5-6-7-8(2)9/h8-9H,3-7H2,1-2H3	InChI=1/C8H18O/c1-3-4-5-6-7-8(2)9/h8-9H,3-7H2,1-2H3	C8H18O	130.136	134.168	134.05	134.06	Lite	0	0	0	0	0	0	0	0	0	0
DTXCID8021519	4-Methyl-3-heptanol	14979-39-6	CCCC(C)C(O)CC	InChI=1/C8H18O/c1-4-6-7(3)8(9)5-2/h7-9H,4-6H2,1-3H3	InChI=1/C8H18O/c1-4-6-7(3)8(9)5-2/h7-9H,4-6H2,1-3H3	C8H18O	130.136	132.765	131.925	132.085	Lite	0	0	0	0	0	0	0	0	0	0
DTXCID7027469	N,N,N',N'-Tetramethyl-1,3-propanediamine	110-95-2	CN(C)CCCN(C)C	InChI=1S/C7H18N2/c1-8(2)6-5-7-9(3)4/h5-7H2,1-4H3	InChI=1S/C7H18N2/c1-8(2)6-5-7-9(3)4/h5-7H2,1-4H3	C7H18N2	130.147	131.931	131.842	131.262	Lite	0	0	0	0	0	0	0	0	0	0
DTXCID4024480	Acetone thiosemicarbazide	1752-30-3	CC(C)=NNC(N)=S	InChI=1S/C4H9N3S/c1-3(2)6-7-4(5)8/h1-2H3,(H3,5,7,8)	InChI=1S/C4H9N3S/c1-3(2)6-7-4(5)8/h1-2H3,(H3,5,7,8)	C4H9N3S	131.052	124.701	123.076	122.811	Lite	0	0	0	0	0	0	0	0	0	0
DTXCID9020451	Creatine	57-00-1	CN(CC(O)=O)C(N)=N	InChI=1S/C4H9N3O2/c1-7(4(5)6)2-3(8)9/h2H2,1H3,(H3,5,6)(H,8,9)_x000D_	InChI=1S/C4H9N3O2/c1-7(4(5)6)2-3(8)9/h2H2,1H3,(H3,5,6)(H,8,9)	C4H9N3O2	131.07	124.267	124.303	123.242	Lite	0	0	0	0	0	0	0	0	0	0
DTXCID601775	3-Methylindole	83-34-1	CC1=CNC2=C1C=CC=C2	InChI=1S/C9H9N/c1-7-6-10-9-5-3-2-4-8(7)9/h2-6,10H,1H3	InChI=1S/C9H9N/c1-7-6-10-9-5-3-2-4-8(7)9/h2-6,10H,1H3	C9H9N	131.073			125.061	Lite	0	0	0	0	0	0	0	0	0	0
DTXCID902090	4-(2-Hydroxyethyl)morpholine	622-40-2	OCCN1CCOCC1	InChI=1S/C6H13NO2/c8-4-1-7-2-5-9-6-3-7/h8H,1-6H2	InChI=1S/C6H13NO2/c8-4-1-7-2-5-9-6-3-7/h8H,1-6H2	C6H13NO2	131.095	127.446	126.64	126.451	Lite	0	0	0	0	0	0	0	0	0	0
DTXCID101380	1,1,2-Trichloroethane	79-00-5	ClCC(Cl)Cl	InChI=1S/C2H3Cl3/c3-1-2(4)5/h2H,1H2	InChI=1S/C2H3Cl3/c3-1-2(4)5/h2H,1H2	C2H3Cl3	131.93			90.2058	Lite	0	0	0	0	0	0	0	0	0	0
DTXCID309145	Dimethyl malonate	108-59-8	COC(=O)CC(=O)OC	InChI=1S/C5H8O4/c1-8-4(6)3-5(7)9-2/h3H2,1-2H3	InChI=1S/C5H8O4/c1-8-4(6)3-5(7)9-2/h3H2,1-2H3	C5H8O4	132.042	127.26	127.77	127.751	Lite	0	0	0	0	0	0	0	0	0	0
DTXCID401654	Pentanedioic acid	110-94-1	OC(=O)CCCC(O)=O	InChI=1S/C5H8O4/c6-4(7)2-1-3-5(8)9/h1-3H2,(H,6,7)(H,8,9)	InChI=1S/C5H8O4/c6-4(7)2-1-3-5(8)9/h1-3H2,(H,6,7)(H,8,9)	C5H8O4	132.042			127.832	Lite	0	0	0	0	0	0	0	0	0	0
DTXCID5024425	Monomethyl succinate	3878-55-5	COC(=O)CCC(O)=O	InChI=1S/C5H8O4/c1-9-5(8)3-2-4(6)7/h2-3H2,1H3,(H,6,7)	InChI=1S/C5H8O4/c1-9-5(8)3-2-4(6)7/h2-3H2,1H3,(H,6,7)	C5H8O4	132.042	126.924	126.063	126.261	Lite	0	0	0	0	0	0	0	0	0	0
DTXCID801472	N-Nitroso-N-methylurethane	615-53-2	CCOC(=O)N(C)N=O	InChI=1S/C4H8N2O3/c1-3-9-4(7)6(2)5-8/h3H2,1-2H3	InChI=1S/C4H8N2O3/c1-3-9-4(7)6(2)5-8/h3H2,1-2H3	C4H8N2O3	132.054	125.911	124.854	124.556	Lite	0	0	0	0	0	0	0	0	0	0
DTXCID1030860	1,3-Dihydro-2H-inden-2-one	615-13-4	O=C1CC2=CC=CC=C2C1	InChI=1S/C9H8O/c10-9-5-7-3-1-2-4-8(7)6-9/h1-4H,5-6H2	InChI=1S/C9H8O/c10-9-5-7-3-1-2-4-8(7)6-9/h1-4H,5-6H2	C9H8O	132.058	126.206	126.111	125.841	Lite	0	0	0	0	0	0	0	0	0	0
DTXCID10911537, DTXCID10911537	3-Phenylprop-2-enal, (2E)-3-Phenylprop-2-enal	104-55-2, 14371-10-9	O=CC=CC1=CC=CC=C1	InChI=1S/C9H8O/c10-8-4-7-9-5-2-1-3-6-9/h1-8H	InChI=1S/C9H8O/c10-8-4-7-9-5-2-1-3-6-9/h1-8H	C9H8O	132.058	132.8	131.8	131.528	Lite	0	0	0	0	0	0	0	0	0	0
DTXCID40466	N,N'-Diethylthiourea	105-55-5	CCNC(=S)NCC	InChI=1S/C5H12N2S/c1-3-6-5(8)7-4-2/h3-4H2,1-2H3,(H2,6,7,8)	InChI=1S/C5H12N2S/c1-3-6-5(8)7-4-2/h3-4H2,1-2H3,(H2,6,7,8)	C5H12N2S	132.072	129.751	129.123	128.699	Lite	0	0	0	0	0	0	0	0	0	0
DTXCID806126	1,1,3,3-Tetramethyl-2-thiourea	2782-91-4	CN(C)C(=S)N(C)C	InChI=1S/C5H12N2S/c1-6(2)5(8)7(3)4/h1-4H3_x000D_	InChI=1S/C5H12N2S/c1-6(2)5(8)7(3)4/h1-4H3	C5H12N2S	132.072			124.363	Lite	0	0	0	0	0	0	0	0	0	0
DTXCID003419	Paraldehyde	123-63-7	CC1OC(C)OC(C)O1	InChI=1S/C6H12O3/c1-4-7-5(2)9-6(3)8-4/h4-6H,1-3H3	InChI=1S/C6H12O3/c1-4-7-5(2)9-6(3)8-4/h4-6H,1-3H3	C6H12O3	132.079	123.845	123.405	123.237	Lite	0	0	0	0	0	0	0	0	0	0
DTXCID105305	Ethyl 3-hydroxybutyrate	5405-41-4	CCOC(=O)CC(C)O	InChI=1/C6H12O3/c1-3-9-6(8)4-5(2)7/h5,7H,3-4H2,1-2H3	InChI=1/C6H12O3/c1-3-9-6(8)4-5(2)7/h5,7H,3-4H2,1-2H3	C6H12O3	132.079	129.532	128.957	128.714	Lite	0	0	0	0	0	0	0	0	0	0
DTXCID106796	1-Methoxy-2-propyl acetate	108-65-6	COCC(C)OC(C)=O	InChI=1/C6H12O3/c1-5(4-8-3)9-6(2)7/h5H,4H2,1-3H3	InChI=1/C6H12O3/c1-5(4-8-3)9-6(2)7/h5H,4H2,1-3H3	C6H12O3	132.079	128.029	127.912	127.514	Lite	0	0	0	0	0	0	0	0	0	0
DTXCID2024375	Glycerol 1-allylether	123-34-2	OCC(O)COCC=C	InChI=1/C6H12O3/c1-2-3-9-5-6(8)4-7/h2,6-8H,1,3-5H2	InChI=1/C6H12O3/c1-2-3-9-5-6(8)4-7/h2,6-8H,1,3-5H2	C6H12O3	132.079	128.273	126.669	126.649	Lite	0	0	0	0	0	0	0	0	0	0
DTXCID2029290	Propyl L-lactate	53651-69-7	CCCOC(=O)[C@H](C)O	InChI=1S/C6H12O3/c1-3-4-9-6(8)5(2)7/h5,7H,3-4H2,1-2H3/t5-/m0/s1_x000D_	InChI=1S/C6H12O3/c1-3-4-9-6(8)5(2)7/h5,7H,3-4H2,1-2H3/t5-/m0/s1	C6H12O3	132.079	128.136	127.894	127.897	Lite	0	0	0	0	0	0	0	0	0	0
DTXCID4024725	Butyl hydroxyacetate	7397-62-8	CCCCOC(=O)CO	InChI=1S/C6H12O3/c1-2-3-4-9-6(8)5-7/h7H,2-5H2,1H3	InChI=1S/C6H12O3/c1-2-3-4-9-6(8)5-7/h7H,2-5H2,1H3	C6H12O3	132.079	128.446	128.283	128.147	Lite	0	0	0	0	0	0	0	0	0	0
DTXCID701928	2-Ethoxyethyl acetate	111-15-9	CCOCCOC(C)=O	InChI=1S/C6H12O3/c1-3-8-4-5-9-6(2)7/h3-5H2,1-2H3	InChI=1S/C6H12O3/c1-3-8-4-5-9-6(2)7/h3-5H2,1-2H3	C6H12O3	132.079	128.359	128.445	128.018	Lite	0	0	0	0	0	0	0	0	0	0
DTXCID305023	Dicyclopentadiene	77-73-6	C1C=CC2C3CC(C=C3)C12	InChI=1/C10H12/c1-2-9-7-4-5-8(6-7)10(9)3-1/h1-2,4-5,7-10H,3,6H2	InChI=1/C10H12/c1-2-9-7-4-5-8(6-7)10(9)3-1/h1-2,4-5,7-10H,3,6H2	C10H12	132.094			123.46	Lite	0	0	0	0	0	0	0	0	0	0
DTXCID306118	Tetralin	119-64-2	C1CCC2=C(C1)C=CC=C2	InChI=1S/C10H12/c1-2-6-10-8-4-3-7-9(10)5-1/h1-2,5-6H,3-4,7-8H2	InChI=1S/C10H12/c1-2-6-10-8-4-3-7-9(10)5-1/h1-2,5-6H,3-4,7-8H2	C10H12	132.094			126.57	Lite	0	0	0	0	0	0	0	0	0	0
DTXCID707589	1-Butoxy-2-propanol	5131-66-8	CCCCOCC(C)O	InChI=1/C7H16O2/c1-3-4-5-9-6-7(2)8/h7-8H,3-6H2,1-2H3	InChI=1/C7H16O2/c1-3-4-5-9-6-7(2)8/h7-8H,3-6H2,1-2H3	C7H16O2	132.115	132.417	132.179	131.771	Lite	0	0	0	0	0	0	0	0	0	0
DTXCID809755	Propylene glycol monobutyl ether	29387-86-8	CCCCOC(O)CC	InChI=1/C7H16O2/c1-3-5-6-9-7(8)4-2/h7-8H,3-6H2,1-2H3	InChI=1/C7H16O2/c1-3-5-6-9-7(8)4-2/h7-8H,3-6H2,1-2H3	C7H16O2	132.115	129.865	129.488	129.744	Lite	0	0	0	0	0	0	0	0	0	0
DTXCID0022199	N-Chlorosuccinimide	128-09-6	ClN1C(=O)CCC1=O	InChI=1S/C4H4ClNO2/c5-6-3(7)1-2-4(6)8/h1-2H2	InChI=1S/C4H4ClNO2/c5-6-3(7)1-2-4(6)8/h1-2H2	C4H4ClNO2	132.993	113.653	113.463	113.003	Lite	0	0	0	0	0	0	0	0	0	0
DTXCID7031169	4-Anisonitrile	874-90-8	COC1=CC=C(C=C1)C#N	InChI=1S/C8H7NO/c1-10-8-4-2-7(6-9)3-5-8/h2-5H,1H3	InChI=1S/C8H7NO/c1-10-8-4-2-7(6-9)3-5-8/h2-5H,1H3	C8H7NO	133.053	142.766	151.806	129.128	Standard	0	0	0	0	0	0	0	0	0	0
DTXCID90209363	Aldicarb oxime	1646-75-9	CSC(C)(C)C=NO	InChI=1S/C5H11NOS/c1-5(2,8-3)4-6-7/h4,7H,1-3H3/b6-4-	InChI=1S/C5H11NOS/c1-5(2,8-3)4-6-7/h4,7H,1-3H3/b6-4-	C5H11NOS	133.056	125.192	124.488	124.391	Lite	0	0	0	0	0	0	0	0	0	0
DTXCID004465	2-Aminobenzimidazole	934-32-7	NC1=NC2=CC=CC=C2N1	InChI=1S/C7H7N3/c8-7-9-5-3-1-2-4-6(5)10-7/h1-4H,(H3,8,9,10)	InChI=1S/C7H7N3/c8-7-9-5-3-1-2-4-6(5)10-7/h1-4H,(H3,8,9,10)	C7H7N3	133.064	130.494	148.331	126.692	Standard	0	0	0	0	1	0	0	0	0	1
DTXCID9018743	5-Methyl-1H-benzotriazole	136-85-6	CC1=CC2=C(NN=N2)C=C1	InChI=1S/C7H7N3/c1-5-2-3-6-7(4-5)9-10-8-6/h2-4H,1H3,(H,8,9,10)	InChI=1S/C7H7N3/c1-5-2-3-6-7(4-5)9-10-8-6/h2-4H,1H3,(H,8,9,10)	C7H7N3	133.064	132.088	146.088	127.364	Standard	0	0	0	0	0	0	0	0	0	0
DTXCID1024625	N,N-Bis(2-hydroxyethyl)formamide	25209-66-9	OCCN(CCO)C=O	InChI=1S/C5H11NO3/c7-3-1-6(5-9)2-4-8/h5,7-8H,1-4H2	InChI=1S/C5H11NO3/c7-3-1-6(5-9)2-4-8/h5,7-8H,1-4H2	C5H11NO3	133.074	127.798	126.393	126.039	Lite	0	0	0	0	0	1	0	0	0	1
DTXCID20179	Diisopropanolamine	110-97-4	CC(O)CNCC(C)O	InChI=1/C6H15NO2/c1-5(8)3-7-4-6(2)9/h5-9H,3-4H2,1-2H3	InChI=1/C6H15NO2/c1-5(8)3-7-4-6(2)9/h5-9H,3-4H2,1-2H3	C6H15NO2	133.11	132.069	131.95	132.189	Lite	0	0	0	0	0	0	0	0	0	0
DTXCID6021955	Ethyl diethanolamine	139-87-7	CCN(CCO)CCO	InChI=1S/C6H15NO2/c1-2-7(3-5-8)4-6-9/h8-9H,2-6H2,1H3	InChI=1S/C6H15NO2/c1-2-7(3-5-8)4-6-9/h8-9H,2-6H2,1H3	C6H15NO2	133.11	127.252	126.883	128.425	Lite	0	0	0	0	0	0	0	0	0	0
DTXCID3011393	1,2-Dichloro-1,1-difluoroethane	1649-08-7	FC(F)(Cl)CCl	InChI=1S/C2H2Cl2F2/c3-1-2(4,5)6/h1H2_x000D_	InChI=1S/C2H2Cl2F2/c3-1-2(4,5)6/h1H2	C2H2Cl2F2	133.95			89.7509	Lite	0	0	0	0	0	0	0	0	0	0
DTXCID107640	Malic acid	6915-15-7	OC(CC(O)=O)C(O)=O	InChI=1/C4H6O5/c5-2(4(8)9)1-3(6)7/h2,5H,1H2,(H,6,7)(H,8,9)	InChI=1/C4H6O5/c5-2(4(8)9)1-3(6)7/h2,5H,1H2,(H,6,7)(H,8,9)	C4H6O5	134.022	123.364	122.234	122.202	Lite	0	0	0	0	0	0	0	0	0	0
DTXCID2021575	Diglycolic acid	110-99-6	OC(=O)COCC(O)=O	InChI=1S/C4H6O5/c5-3(6)1-9-2-4(7)8/h1-2H2,(H,5,6)(H,7,8)	InChI=1S/C4H6O5/c5-3(6)1-9-2-4(7)8/h1-2H2,(H,5,6)(H,7,8)	C4H6O5	134.022	123.348	122.043	122.589	Lite	0	0	0	0	0	0	0	0	0	0
DTXCID4030675	Dimethyl dicarbonate	4525-33-1	COC(=O)OC(=O)OC	InChI=1S/C4H6O5/c1-7-3(5)9-4(6)8-2/h1-2H3_x000D_	InChI=1S/C4H6O5/c1-7-3(5)9-4(6)8-2/h1-2H3	C4H6O5	134.022	128.467	127.625	126.981	Lite	0	0	0	0	0	0	0	0	0	0
DTXCID4012514	1,2-Benzenedicarboxaldehyde	643-79-8	O=CC1=CC=CC=C1C=O	InChI=1S/C8H6O2/c9-5-7-3-1-2-4-8(7)6-10/h1-6H	InChI=1S/C8H6O2/c9-5-7-3-1-2-4-8(7)6-10/h1-6H	C8H6O2	134.037	128.181	139.312	122.668	Standard	0	0	0	0	0	0	0	0	0	0
DTXCID7031167	Phthalide	87-41-2	O=C1OCC2=CC=CC=C12	InChI=1S/C8H6O2/c9-8-7-4-2-1-3-6(7)5-10-8/h1-4H,5H2	InChI=1S/C8H6O2/c9-8-7-4-2-1-3-6(7)5-10-8/h1-4H,5H2	C8H6O2	134.037	127.733	144.408	122.193	Standard	0	0	0	0	0	0	0	0	0	0
DTXCID907749	1-Chloro-3,3-dimethyl-butan-2-one	13547-70-1	CC(C)(C)C(=O)CCl	InChI=1S/C6H11ClO/c1-6(2,3)5(8)4-7/h4H2,1-3H3	InChI=1S/C6H11ClO/c1-6(2,3)5(8)4-7/h4H2,1-3H3	C6H11ClO	134.05	119.151	118.857	118.408	Lite	0	0	0	0	0	0	0	0	0	0
DTXCID6030574	1,1,3,3-Tetramethyldisiloxane	3277-26-7	C[SiH](C)O[SiH](C)C	InChI=1S/C4H14OSi2/c1-6(2)5-7(3)4/h6-7H,1-4H3	InChI=1S/C4H14OSi2/c1-6(2)5-7(3)4/h6-7H,1-4H3	C4H14OSi2	134.058	114.656	114.509		Lite	0	0	0	0	0	0	0	0	0	0
DTXCID0021626	3,4-Dimethylbenzaldehyde	5973-71-7	CC1=C(C)C=C(C=O)C=C1	InChI=1S/C9H10O/c1-7-3-4-9(6-10)5-8(7)2/h3-6H,1-2H3	InChI=1S/C9H10O/c1-7-3-4-9(6-10)5-8(7)2/h3-6H,1-2H3	C9H10O	134.073	130.939	130.666	130.537	Lite	0	0	0	0	0	0	0	0	0	0
DTXCID0024470	1-Phenylpropan-1-one	93-55-0	CCC(=O)C1=CC=CC=C1	InChI=1S/C9H10O/c1-2-9(10)8-6-4-3-5-7-8/h3-7H,2H2,1H3	InChI=1S/C9H10O/c1-2-9(10)8-6-4-3-5-7-8/h3-7H,2H2,1H3	C9H10O	134.073	130.575	130.096	130.103	Lite	0	0	0	0	0	0	0	0	0	0
DTXCID1031202	Hydratropaldehyde	93-53-8	CC(C=O)C1=CC=CC=C1	InChI=1/C9H10O/c1-8(7-10)9-5-3-2-4-6-9/h2-8H,1H3	InChI=1/C9H10O/c1-8(7-10)9-5-3-2-4-6-9/h2-8H,1H3	C9H10O	134.073	130.511	129.811	130.022	Lite	0	0	0	0	0	0	0	0	0	0
DTXCID40911641	3-Phenyl-2-propen-1-ol	104-54-1	OCC=CC1=CC=CC=C1	InChI=1S/C9H10O/c10-8-4-7-9-5-2-1-3-6-9/h1-7,10H,8H2	InChI=1S/C9H10O/c10-8-4-7-9-5-2-1-3-6-9/h1-7,10H,8H2	C9H10O	134.073	133.476	132.89	132.855	Lite	0	0	0	0	0	0	0	0	0	0
DTXCID6030073	(4-Methylphenyl)acetaldehyde	104-09-6	CC1=CC=C(CC=O)C=C1	InChI=1S/C9H10O/c1-8-2-4-9(5-3-8)6-7-10/h2-5,7H,6H2,1H3_x000D_	InChI=1S/C9H10O/c1-8-2-4-9(5-3-8)6-7-10/h2-5,7H,6H2,1H3	C9H10O	134.073	133.192	131.539	131.656	Lite	0	0	0	0	0	0	0	0	0	0
DTXCID6030287	Indan-5-ol	1470-94-6	OC1=CC2=C(CCC2)C=C1	InChI=1S/C9H10O/c10-9-5-4-7-2-1-3-8(7)6-9/h4-6,10H,1-3H2	InChI=1S/C9H10O/c10-9-5-4-7-2-1-3-8(7)6-9/h4-6,10H,1-3H2	C9H10O	134.073	128.202	127.631	127.426	Lite	0	0	0	0	0	0	0	0	0	0
DTXCID7024374	p-Methylacetophenone	122-00-9	CC(=O)C1=CC=C(C)C=C1	InChI=1S/C9H10O/c1-7-3-5-9(6-4-7)8(2)10/h3-6H,1-2H3	InChI=1S/C9H10O/c1-7-3-5-9(6-4-7)8(2)10/h3-6H,1-2H3	C9H10O	134.073	131.682	131.227	130.719	Lite	0	0	0	0	0	0	0	0	0	0
DTXCID802164	2-Allylphenol	1745-81-9	OC1=CC=CC=C1CC=C	InChI=1S/C9H10O/c1-2-5-8-6-3-4-7-9(8)10/h2-4,6-7,10H,1,5H2	InChI=1S/C9H10O/c1-2-5-8-6-3-4-7-9(8)10/h2-4,6-7,10H,1,5H2	C9H10O	134.073	130.956	130.229	130.183	Lite	0	0	0	0	0	1	0	0	0	0
DTXCID8027080	4-Ethylbenzaldehyde	4748-78-1	CCC1=CC=C(C=O)C=C1	InChI=1S/C9H10O/c1-2-8-3-5-9(7-10)6-4-8/h3-7H,2H2,1H3	InChI=1S/C9H10O/c1-2-8-3-5-9(7-10)6-4-8/h3-7H,2H2,1H3	C9H10O	134.073	132.183	131.759	131.642	Lite	0	0	0	0	0	0	0	0	0	0
DTXCID8027610	3-Phenylpropanal	104-53-0	O=CCCC1=CC=CC=C1	InChI=1S/C9H10O/c10-8-4-7-9-5-2-1-3-6-9/h1-3,5-6,8H,4,7H2	InChI=1S/C9H10O/c10-8-4-7-9-5-2-1-3-6-9/h1-3,5-6,8H,4,7H2	C9H10O	134.073	130.083	129.822	129.581	Lite	0	0	0	0	0	0	0	0	0	0
DTXCID2027678	5,6,7,8-Tetrahydroquinoxaline	34413-35-9	C1CCC2=NC=CN=C2C1	InChI=1S/C8H10N2/c1-2-4-8-7(3-1)9-5-6-10-8/h5-6H,1-4H2	InChI=1S/C8H10N2/c1-2-4-8-7(3-1)9-5-6-10-8/h5-6H,1-4H2	C8H10N2	134.084	126.496	125.755	125.337	Lite	0	0	0	0	0	0	0	0	0	0
DTXCID5027196	5H-5-Methyl-6,7-dihydrocyclopenta[b]pyrazine	23747-48-0	CC1CCC2=C1N=CC=N2	InChI=1/C8H10N2/c1-6-2-3-7-8(6)10-5-4-9-7/h4-6H,2-3H2,1H3	InChI=1/C8H10N2/c1-6-2-3-7-8(6)10-5-4-9-7/h4-6H,2-3H2,1H3	C8H10N2	134.084	127.008	126.49	125.98	Lite	0	0	0	0	0	0	0	0	0	0
DTXCID1021370	3-(Hydroxymethyl)pentane-2,4-diol	921-20-0	CC(O)C(CO)C(C)O	InChI=1/C6H14O3/c1-4(8)6(3-7)5(2)9/h4-9H,3H2,1-2H3	InChI=1/C6H14O3/c1-4(8)6(3-7)5(2)9/h4-9H,3H2,1-2H3	C6H14O3	134.094	129.032	127.852	127.797	Lite	0	0	0	0	0	0	0	0	0	0
DTXCID206863	1,1'-Oxybis-2-propanol	110-98-5	CC(O)COCC(C)O	InChI=1/C6H14O3/c1-5(7)3-9-4-6(2)8/h5-8H,3-4H2,1-2H3	InChI=1/C6H14O3/c1-5(7)3-9-4-6(2)8/h5-8H,3-4H2,1-2H3	C6H14O3	134.094	132.066	129.667	130.445	Lite	0	0	0	0	0	0	0	0	0	0
DTXCID501941	2-(2-Ethoxyethoxy)ethanol	111-90-0	CCOCCOCCO	InChI=1S/C6H14O3/c1-2-8-5-6-9-4-3-7/h7H,2-6H2,1H3	InChI=1S/C6H14O3/c1-2-8-5-6-9-4-3-7/h7H,2-6H2,1H3	C6H14O3	134.094	129.93	129.563	129.383	Lite	0	0	0	0	0	0	0	0	0	0
DTXCID6031384	1,2,3-Hexanetriol	90325-47-6	CCCC(O)C(O)CO	InChI=1/C6H14O3/c1-2-3-5(8)6(9)4-7/h5-9H,2-4H2,1H3	InChI=1/C6H14O3/c1-2-3-5(8)6(9)4-7/h5-9H,2-4H2,1H3	C6H14O3	134.094	130.439	128.852	128.652	Lite	0	0	0	0	0	0	0	0	0	0
DTXCID604621	Bis(2-methoxyethyl) ether	111-96-6	COCCOCCOC	InChI=1S/C6H14O3/c1-7-3-5-9-6-4-8-2/h3-6H2,1-2H3	InChI=1S/C6H14O3/c1-7-3-5-9-6-4-8-2/h3-6H2,1-2H3	C6H14O3	134.094	130.702	131.22	130.947	Lite	0	0	0	0	0	0	0	0	0	0
DTXCID8021224	1,2,6-Hexanetriol	106-69-4	OCCCCC(O)CO	InChI=1/C6H14O3/c7-4-2-1-3-6(9)5-8/h6-9H,1-5H2	InChI=1/C6H14O3/c7-4-2-1-3-6(9)5-8/h6-9H,1-5H2	C6H14O3	134.094	130.064	130.809	131.152	Lite	0	0	0	0	0	0	0	0	0	0
DTXCID006645	p-Cymene	99-87-6	CC(C)C1=CC=C(C)C=C1	InChI=1S/C10H14/c1-8(2)10-6-4-9(3)5-7-10/h4-8H,1-3H3	InChI=1S/C10H14/c1-8(2)10-6-4-9(3)5-7-10/h4-8H,1-3H3	C10H14	134.11			133.481	Lite	0	0	0	0	0	0	0	0	0	0
DTXCID1027138	tert-Butylbenzene	98-06-6	CC(C)(C)C1=CC=CC=C1	InChI=1S/C10H14/c1-10(2,3)9-7-5-4-6-8-9/h4-8H,1-3H3	InChI=1S/C10H14/c1-10(2,3)9-7-5-4-6-8-9/h4-8H,1-3H3	C10H14	134.11			130.372	Lite	0	0	0	0	0	0	0	0	0	0
DTXCID309124	1,2,4,5-Tetramethylbenzene	95-93-2	CC1=CC(C)=C(C)C=C1C	InChI=1S/C10H14/c1-7-5-9(3)10(4)6-8(7)2/h5-6H,1-4H3	InChI=1S/C10H14/c1-7-5-9(3)10(4)6-8(7)2/h5-6H,1-4H3	C10H14	134.11			132.639	Lite	0	0	0	0	0	0	0	0	0	0
DTXCID402003	1,3-Diethylbenzene	141-93-5	CCC1=CC(CC)=CC=C1	InChI=1S/C10H14/c1-3-9-6-5-7-10(4-2)8-9/h5-8H,3-4H2,1-2H3	InChI=1S/C10H14/c1-3-9-6-5-7-10(4-2)8-9/h5-8H,3-4H2,1-2H3	C10H14	134.11			134.211	Lite	0	0	0	0	0	0	0	0	0	0
DTXCID706119	1,2,3,5-Tetramethylbenzene	527-53-7	CC1=CC(C)=C(C)C(C)=C1	InChI=1S/C10H14/c1-7-5-8(2)10(4)9(3)6-7/h5-6H,1-4H3	InChI=1S/C10H14/c1-7-5-8(2)10(4)9(3)6-7/h5-6H,1-4H3	C10H14	134.11			132.584	Lite	0	0	0	0	0	0	0	0	0	0
DTXCID707181	Isobutylbenzene	538-93-2	CC(C)CC1=CC=CC=C1	InChI=1S/C10H14/c1-9(2)8-10-6-4-3-5-7-10/h3-7,9H,8H2,1-2H3	InChI=1S/C10H14/c1-9(2)8-10-6-4-3-5-7-10/h3-7,9H,8H2,1-2H3	C10H14	134.11			132.015	Lite	0	0	0	0	0	0	0	0	0	0
DTXCID902333	sec-Butylbenzene	135-98-8	CCC(C)C1=CC=CC=C1	InChI=1/C10H14/c1-3-9(2)10-7-5-4-6-8-10/h4-9H,3H2,1-2H3	InChI=1/C10H14/c1-3-9(2)10-7-5-4-6-8-10/h4-9H,3H2,1-2H3	C10H14	134.11			132.277	Lite	0	0	0	0	0	0	0	0	0	0
DTXCID902472	Butylbenzene	104-51-8	CCCCC1=CC=CC=C1	InChI=1S/C10H14/c1-2-3-7-10-8-5-4-6-9-10/h4-6,8-9H,2-3,7H2,1H3	InChI=1S/C10H14/c1-2-3-7-10-8-5-4-6-9-10/h4-6,8-9H,2-3,7H2,1H3	C10H14	134.11			131.956	Lite	0	0	0	0	0	0	0	0	0	0
DTXCID0014968	2,4-Dithiobiuret	541-53-7	NC(=S)NC(N)=S	InChI=1S/C2H5N3S2/c3-1(6)5-2(4)7/h(H5,3,4,5,6,7)	InChI=1S/C2H5N3S2/c3-1(6)5-2(4)7/h(H5,3,4,5,6,7)	C2H5N3S2	134.993	120.251	120.164	119.29	Lite	0	0	0	0	0	0	0	0	0	0
DTXCID204586	Benzothiazole	95-16-9	S1C=NC2=CC=CC=C12	InChI=1S/C7H5NS/c1-2-4-7-6(3-1)8-5-9-7/h1-5H	InChI=1S/C7H5NS/c1-2-4-7-6(3-1)8-5-9-7/h1-5H	C7H5NS	135.014	117.572	117.056	116.485	Lite	0	0	0	0	0	0	0	0	0	0
DTXCID1024627	1H-Benzotriazol-1-ol	2592-95-2	ON1N=NC2=C1C=CC=C2	InChI=1S/C6H5N3O/c10-9-6-4-2-1-3-5(6)7-8-9/h1-4,10H	InChI=1S/C6H5N3O/c10-9-6-4-2-1-3-5(6)7-8-9/h1-4,10H	C6H5N3O	135.043	123.5	123.179	122.963	Lite	0	0	0	0	0	0	1	0	0	1
DTXCID1031171	Diethylcarbamoyl chloride	88-10-8	CCN(CC)C(Cl)=O	InChI=1S/C5H10ClNO/c1-3-7(4-2)5(6)8/h3-4H2,1-2H3	InChI=1S/C5H10ClNO/c1-3-7(4-2)5(6)8/h3-4H2,1-2H3	C5H10ClNO	135.045	120.446	120.326	120.272	Lite	0	0	0	0	0	0	0	0	0	0
DTXCID3021437	2-Methyl-2-nitro-1,3-propanediol	77-49-6	CC(CO)(CO)[N+]([O-])=O	InChI=1S/C4H9NO4/c1-4(2-6,3-7)5(8)9/h6-7H,2-3H2,1H3	InChI=1S/C4H9NO4/c1-4(2-6,3-7)5(8)9/h6-7H,2-3H2,1H3	C4H9NO4	135.053	126.31	124.654	124.775	Lite	0	0	0	0	0	0	0	0	0	0
DTXCID502557	Adenine	73-24-5	NC1=NC=NC2=C1N=CN2	InChI=1S/C5H5N5/c6-4-3-5(9-1-7-3)10-2-8-4/h1-2H,(H3,6,7,8,9,10)	InChI=1S/C5H5N5/c6-4-3-5(9-1-7-3)10-2-8-4/h1-2H,(H3,6,7,8,9,10)	C5H5N5	135.054	132.516	143.682	127.906	Standard	0	0	0	0	0	0	0	0	0	0
DTXCID601830	3-Aminoacetophenone	99-03-6	CC(=O)C1=CC=CC(N)=C1	InChI=1S/C8H9NO/c1-6(10)7-3-2-4-8(9)5-7/h2-5H,9H2,1H3_x000D_	InChI=1S/C8H9NO/c1-6(10)7-3-2-4-8(9)5-7/h2-5H,9H2,1H3	C8H9NO	135.068	130.31	129.541	129.214	Lite	0	0	0	0	0	0	0	0	0	0
DTXCID6030784	2'-Aminoacetophenone	551-93-9	CC(=O)C1=CC=CC=C1N	InChI=1S/C8H9NO/c1-6(10)7-4-2-3-5-8(7)9/h2-5H,9H2,1H3	InChI=1S/C8H9NO/c1-6(10)7-4-2-3-5-8(7)9/h2-5H,9H2,1H3	C8H9NO	135.068	128.34	127.63	127.483	Lite	0	0	0	0	0	0	0	0	0	0
DTXCID7031242	4-Aminoacetophenone	99-92-3	CC(=O)C1=CC=C(N)C=C1	InChI=1S/C8H9NO/c1-6(10)7-2-4-8(9)5-3-7/h2-5H,9H2,1H3_x000D_	InChI=1S/C8H9NO/c1-6(10)7-2-4-8(9)5-3-7/h2-5H,9H2,1H3	C8H9NO	135.068	130.411	129.513	129.182	Lite	0	0	0	0	0	0	0	0	0	0
DTXCID0030900	2-Isopropylaniline	643-28-7	CC(C)C1=C(N)C=CC=C1	InChI=1S/C9H13N/c1-7(2)8-5-3-4-6-9(8)10/h3-7H,10H2,1-2H3	InChI=1S/C9H13N/c1-7(2)8-5-3-4-6-9(8)10/h3-7H,10H2,1-2H3	C9H13N	135.105	130.49	129.763	129.71	Lite	0	0	0	0	0	0	0	0	0	0
DTXCID101848	N-Ethyl-3-methylaniline	102-27-2	CCNC1=CC(C)=CC=C1	InChI=1S/C9H13N/c1-3-10-9-6-4-5-8(2)7-9/h4-7,10H,3H2,1-2H3	InChI=1S/C9H13N/c1-3-10-9-6-4-5-8(2)7-9/h4-7,10H,3H2,1-2H3	C9H13N	135.105	135.001	134.18	133.91	Lite	0	0	0	0	0	0	0	0	0	0
DTXCID1028154	4-Propylaniline	2696-84-6	CCCC1=CC=C(N)C=C1	InChI=1S/C9H13N/c1-2-3-8-4-6-9(10)7-5-8/h4-7H,2-3,10H2,1H3	InChI=1S/C9H13N/c1-2-3-8-4-6-9(10)7-5-8/h4-7H,2-3,10H2,1H3	C9H13N	135.105	133.229	132.374	132.041	Lite	0	0	0	0	0	0	0	0	0	0
DTXCID401832	N,N,4-Trimethylaniline	99-97-8	CN(C)C1=CC=C(C)C=C1	InChI=1S/C9H13N/c1-8-4-6-9(7-5-8)10(2)3/h4-7H,1-3H3	InChI=1S/C9H13N/c1-8-4-6-9(7-5-8)10(2)3/h4-7H,1-3H3	C9H13N	135.105	132.8	132.46	132.154	Lite	0	0	0	0	0	0	0	0	0	0
DTXCID4030170	N,N,3-Trimethylaniline	121-72-2	CN(C)C1=CC(C)=CC=C1	InChI=1S/C9H13N/c1-8-5-4-6-9(7-8)10(2)3/h4-7H,1-3H3	InChI=1S/C9H13N/c1-8-5-4-6-9(7-8)10(2)3/h4-7H,1-3H3	C9H13N	135.105	132.474	132.073	131.778	Lite	0	0	0	0	0	0	0	0	0	0
DTXCID407833	2-Ethyl-6-methylaniline	24549-06-2	CCC1=CC=CC(C)=C1N	InChI=1S/C9H13N/c1-3-8-6-4-5-7(2)9(8)10/h4-6H,3,10H2,1-2H3	InChI=1S/C9H13N/c1-3-8-6-4-5-7(2)9(8)10/h4-6H,3,10H2,1-2H3	C9H13N	135.105	131.586	131.151	131.067	Lite	0	0	0	0	0	0	0	0	0	0
DTXCID601398	2,4,5-Trimethylaniline	137-17-7	CC1=CC(C)=C(N)C=C1C	InChI=1S/C9H13N/c1-6-4-8(3)9(10)5-7(6)2/h4-5H,10H2,1-3H3	InChI=1S/C9H13N/c1-6-4-8(3)9(10)5-7(6)2/h4-5H,10H2,1-3H3	C9H13N	135.105	132.411	131.786	131.459	Lite	0	0	0	0	0	0	0	0	0	0
DTXCID101903	1-Bromobutane	109-65-9	CCCCBr	InChI=1S/C4H9Br/c1-2-3-4-5/h2-4H2,1H3_x000D_	InChI=1S/C4H9Br/c1-2-3-4-5/h2-4H2,1H3	C4H9Br	135.989				NA	0	0	0	0	0	0	0	0	0	0
DTXCID2031112	1-Bromo-2-methylpropane	78-77-3	CC(C)CBr	InChI=1S/C4H9Br/c1-4(2)3-5/h4H,3H2,1-2H3	InChI=1S/C4H9Br/c1-4(2)3-5/h4H,3H2,1-2H3	C4H9Br	135.989				NA	0	0	0	0	0	0	0	0	0	0
DTXCID4022076, DTXCID4022076	Proxan-potassium, Proxan-sodium	140-92-1, 140-93-2	[K+].CC(C)OC([S-])=S	InChI=1S/C4H8OS2.K/c1-3(2)5-4(6)7;/h3H,1-2H3,(H,6,7);/q;+1/p-1_x000D_	InChI=1S/C4H8OS2/c1-3(2)5-4(6)7/h3H,1-2H3,(H,6,7)	C4H8OS2	136.002			121.306	Lite	0	0	0	0	0	0	0	0	0	0
DTXCID6025066	Sodium 2-methylprop-2-ene-1-sulfonate	1561-92-8	[Na+].CC(=C)CS([O-])(=O)=O	InChI=1S/C4H8O3S.Na/c1-4(2)3-8(5,6)7;/h1,3H2,2H3,(H,5,6,7);/q;+1/p-1	InChI=1S/C4H8O3S/c1-4(2)3-8(5,6)7/h1,3H2,2H3,(H,5,6,7)	C4H8O3S	136.019			123.982	Lite	0	0	0	0	0	0	0	0	0	0
DTXCID0030245	2-Methoxybenzaldehyde	135-02-4	COC1=C(C=O)C=CC=C1	InChI=1S/C8H8O2/c1-10-8-5-3-2-4-7(8)6-9/h2-6H,1H3	InChI=1S/C8H8O2/c1-10-8-5-3-2-4-7(8)6-9/h2-6H,1H3	C8H8O2	136.052	127.502	127.07	126.499	Lite	0	0	0	0	0	0	0	0	0	0
DTXCID201656	Phenylacetic acid	103-82-2	OC(=O)CC1=CC=CC=C1	InChI=1S/C8H8O2/c9-8(10)6-7-4-2-1-3-5-7/h1-5H,6H2,(H,9,10)	InChI=1S/C8H8O2/c9-8(10)6-7-4-2-1-3-5-7/h1-5H,6H2,(H,9,10)	C8H8O2	136.052			128.2	Lite	0	0	0	0	0	0	0	0	0	0
DTXCID209133	4-Hydroxyacetophenone	99-93-4	CC(=O)C1=CC=C(O)C=C1	InChI=1S/C8H8O2/c1-6(9)7-2-4-8(10)5-3-7/h2-5,10H,1H3	InChI=1S/C8H8O2/c1-6(9)7-2-4-8(10)5-3-7/h2-5,10H,1H3	C8H8O2	136.052	129.88	129.447	129.199	Lite	0	0	0	0	0	0	1	0	0	0
DTXCID3024447	3-Methoxybenzaldehyde	591-31-1	COC1=CC=CC(C=O)=C1	InChI=1S/C8H8O2/c1-10-8-4-2-3-7(5-8)6-9/h2-6H,1H3	InChI=1S/C8H8O2/c1-10-8-4-2-3-7(5-8)6-9/h2-6H,1H3	C8H8O2	136.052	130.933	130.335	130.066	Lite	0	0	0	0	0	0	0	0	0	0
DTXCID401617	3-Methylbenzoic acid	99-04-7	CC1=CC=CC(=C1)C(O)=O	InChI=1S/C8H8O2/c1-6-3-2-4-7(5-6)8(9)10/h2-5H,1H3,(H,9,10)	InChI=1S/C8H8O2/c1-6-3-2-4-7(5-6)8(9)10/h2-5H,1H3,(H,9,10)	C8H8O2	136.052			129.199	Lite	0	0	0	0	0	0	0	1	0	1
DTXCID405572	Methyl benzoate	93-58-3	COC(=O)C1=CC=CC=C1	InChI=1S/C8H8O2/c1-10-8(9)7-5-3-2-4-6-7/h2-6H,1H3	InChI=1S/C8H8O2/c1-10-8(9)7-5-3-2-4-6-7/h2-6H,1H3	C8H8O2	136.052	128.733	128.078	127.648	Lite	0	0	0	0	0	0	0	0	0	0
DTXCID5020285	2-Hydroxyacetophenone	118-93-4	CC(=O)C1=CC=CC=C1O	InChI=1S/C8H8O2/c1-6(9)7-4-2-3-5-8(7)10/h2-5,10H,1H3	InChI=1S/C8H8O2/c1-6(9)7-4-2-3-5-8(7)10/h2-5,10H,1H3	C8H8O2	136.052	127.847	127.293	127.094	Lite	0	0	0	0	0	0	0	0	0	0
DTXCID906997	4-Methoxybenzaldehyde	123-11-5	COC1=CC=C(C=O)C=C1	InChI=1S/C8H8O2/c1-10-8-4-2-7(6-9)3-5-8/h2-6H,1H3	InChI=1S/C8H8O2/c1-10-8-4-2-7(6-9)3-5-8/h2-6H,1H3	C8H8O2	136.052	130.44	130.3	129.709	Lite	0	0	0	0	0	0	0	0	0	0
DTXCID5018814	4-Aminobenzamide	2835-68-9	NC(=O)C1=CC=C(N)C=C1	InChI=1S/C7H8N2O/c8-6-3-1-5(2-4-6)7(9)10/h1-4H,8H2,(H2,9,10)	InChI=1S/C7H8N2O/c8-6-3-1-5(2-4-6)7(9)10/h1-4H,8H2,(H2,9,10)	C7H8N2O	136.064	129.07	128.37	128.047	Lite	0	0	1	0	0	0	0	0	0	1
DTXCID6022507	1-Phenylurea	64-10-8	NC(=O)NC1=CC=CC=C1	InChI=1S/C7H8N2O/c8-7(10)9-6-4-2-1-3-5-6/h1-5H,(H3,8,9,10)	InChI=1S/C7H8N2O/c8-7(10)9-6-4-2-1-3-5-6/h1-5H,(H3,8,9,10)	C7H8N2O	136.064	128.756	128.605	128.261	Lite	0	0	0	1	0	0	0	0	0	1
DTXCID801053	Nitrosomethylaniline	614-00-6	CN(N=O)C1=CC=CC=C1	InChI=1S/C7H8N2O/c1-9(8-10)7-5-3-2-4-6-7/h2-6H,1H3	InChI=1S/C7H8N2O/c1-9(8-10)7-5-3-2-4-6-7/h2-6H,1H3	C7H8N2O	136.064	129.964	127.863	127.37	Lite	0	0	0	0	0	0	0	0	0	0
DTXCID002049	2,4,6-Trimethylphenol	527-60-6	CC1=CC(C)=C(O)C(C)=C1	InChI=1S/C9H12O/c1-6-4-7(2)9(10)8(3)5-6/h4-5,10H,1-3H3	InChI=1S/C9H12O/c1-6-4-7(2)9(10)8(3)5-6/h4-5,10H,1-3H3	C9H12O	136.089	131.876	131.484	131.497	Lite	0	0	0	0	0	0	0	0	0	0
DTXCID0024391	2-Isopropylphenol	88-69-7	CC(C)C1=C(O)C=CC=C1	InChI=1S/C9H12O/c1-7(2)8-5-3-4-6-9(8)10/h3-7,10H,1-2H3	InChI=1S/C9H12O/c1-7(2)8-5-3-4-6-9(8)10/h3-7,10H,1-2H3	C9H12O	136.089	129.799	129.606	129.564	Lite	0	0	0	0	1	0	0	0	0	1
DTXCID1027184	2,3,5-Trimethylphenol	697-82-5	CC1=CC(O)=C(C)C(C)=C1	InChI=1S/C9H12O/c1-6-4-7(2)8(3)9(10)5-6/h4-5,10H,1-3H3	InChI=1S/C9H12O/c1-6-4-7(2)8(3)9(10)5-6/h4-5,10H,1-3H3	C9H12O	136.089	131.833	131.387	131.059	Lite	0	0	0	0	0	0	0	0	0	0
DTXCID3022299	4-Isopropylphenol	99-89-8	CC(C)C1=CC=C(O)C=C1	InChI=1S/C9H12O/c1-7(2)8-3-5-9(10)6-4-8/h3-7,10H,1-2H3	InChI=1S/C9H12O/c1-7(2)8-3-5-9(10)6-4-8/h3-7,10H,1-2H3	C9H12O	136.089	132.371	131.422	131.451	Lite	0	0	0	0	0	0	0	0	0	0
DTXCID402100	4-Propylphenol	645-56-7	CCCC1=CC=C(O)C=C1	InChI=1S/C9H12O/c1-2-3-8-4-6-9(10)7-5-8/h4-7,10H,2-3H2,1H3	InChI=1S/C9H12O/c1-2-3-8-4-6-9(10)7-5-8/h4-7,10H,2-3H2,1H3	C9H12O	136.089	132.712	132.053	131.739	Lite	0	0	0	0	0	0	0	0	0	0
DTXCID4021638	3-Phenyl-1-propanol	122-97-4	OCCCC1=CC=CC=C1	InChI=1S/C9H12O/c10-8-4-7-9-5-2-1-3-6-9/h1-3,5-6,10H,4,7-8H2	InChI=1S/C9H12O/c10-8-4-7-9-5-2-1-3-6-9/h1-3,5-6,10H,4,7-8H2	C9H12O	136.089	131.413	130.891	130.667	Lite	0	0	0	0	0	0	0	0	0	0
DTXCID6017756	2-Phenylpropan-1-ol	1123-85-9	CC(CO)C1=CC=CC=C1	InChI=1/C9H12O/c1-8(7-10)9-5-3-2-4-6-9/h2-6,8,10H,7H2,1H3	InChI=1/C9H12O/c1-8(7-10)9-5-3-2-4-6-9/h2-6,8,10H,7H2,1H3	C9H12O	136.089	130.557	130.467	130.182	Lite	0	0	0	0	0	0	0	0	0	0
DTXCID602187	2,3,6-Trimethylphenol	2416-94-6	CC1=CC=C(C)C(O)=C1C	InChI=1S/C9H12O/c1-6-4-5-7(2)9(10)8(6)3/h4-5,10H,1-3H3	InChI=1S/C9H12O/c1-6-4-5-7(2)9(10)8(6)3/h4-5,10H,1-3H3	C9H12O	136.089	130.768	130.355	130.435	Lite	0	0	0	0	0	0	0	0	0	0
DTXCID7027700	2-Propylphenol	644-35-9	CCCC1=C(O)C=CC=C1	InChI=1S/C9H12O/c1-2-5-8-6-3-4-7-9(8)10/h3-4,6-7,10H,2,5H2,1H3	InChI=1S/C9H12O/c1-2-5-8-6-3-4-7-9(8)10/h3-4,6-7,10H,2,5H2,1H3	C9H12O	136.089	131.496	130.572	130.938	Lite	0	0	0	0	0	0	0	0	0	0
DTXCID8024571	3-Isopropylphenol	618-45-1	CC(C)C1=CC=CC(O)=C1	InChI=1S/C9H12O/c1-7(2)8-4-3-5-9(10)6-8/h3-7,10H,1-2H3	InChI=1S/C9H12O/c1-7(2)8-4-3-5-9(10)6-8/h3-7,10H,1-2H3	C9H12O	136.089	132.053	131.317	131.271	Lite	0	0	0	0	0	1	0	0	0	1
DTXCID9027071	2-Methylphenethyl alcohol	19819-98-8	CC1=CC=CC=C1CCO	InChI=1S/C9H12O/c1-8-4-2-3-5-9(8)6-7-10/h2-5,10H,6-7H2,1H3	InChI=1S/C9H12O/c1-8-4-2-3-5-9(8)6-7-10/h2-5,10H,6-7H2,1H3	C9H12O	136.089	130.219	129.69	129.788	Lite	0	0	0	0	0	0	0	0	0	0
DTXCID4027070	Tetramethylpyrazine	1124-11-4	CC1=NC(C)=C(C)N=C1C	InChI=1S/C8H12N2/c1-5-6(2)10-8(4)7(3)9-5/h1-4H3	InChI=1S/C8H12N2/c1-5-6(2)10-8(4)7(3)9-5/h1-4H3	C8H12N2	136.1	132.205	131.815	131.691	Lite	0	0	0	0	0	0	0	0	0	0
DTXCID4027101	2,3-Diethylpyrazine	15707-24-1	CCC1=NC=CN=C1CC	InChI=1S/C8H12N2/c1-3-7-8(4-2)10-6-5-9-7/h5-6H,3-4H2,1-2H3	InChI=1S/C8H12N2/c1-3-7-8(4-2)10-6-5-9-7/h5-6H,3-4H2,1-2H3	C8H12N2	136.1	131.762	131.247	130.736	Lite	0	0	0	0	0	0	0	0	0	0
DTXCID909649	1,3-Benzenedimethanamine	1477-55-0	NCC1=CC(CN)=CC=C1	InChI=1S/C8H12N2/c9-5-7-2-1-3-8(4-7)6-10/h1-4H,5-6,9-10H2	InChI=1S/C8H12N2/c9-5-7-2-1-3-8(4-7)6-10/h1-4H,5-6,9-10H2	C8H12N2	136.1	132.88	132.681	132.368	Lite	0	0	0	0	0	0	0	0	0	0
DTXCID006488	Camphene	79-92-5	CC1(C)C2CCC(C2)C1=C	InChI=1/C10H16/c1-7-8-4-5-9(6-8)10(7,2)3/h8-9H,1,4-6H2,2-3H3	InChI=1/C10H16/c1-7-8-4-5-9(6-8)10(7,2)3/h8-9H,1,4-6H2,2-3H3	C10H16	136.125				NA	0	0	0	0	0	0	0	0	0	0
DTXCID006501	(+)-alpha-Pinene	7785-70-8	CC1=CC[C@@H]2C[C@H]1C2(C)C	InChI=1S/C10H16/c1-7-4-5-8-6-9(7)10(8,2)3/h4,8-9H,5-6H2,1-3H3/t8-,9-/m1/s1	InChI=1S/C10H16/c1-7-4-5-8-6-9(7)10(8,2)3/h4,8-9H,5-6H2,1-3H3/t8-,9-/m1/s1	C10H16	136.125			129.622	Lite	0	0	0	0	0	0	0	0	0	0
DTXCID006501	(-)-alpha-Pinene	7785-26-4	CC1=CC[C@H]2C[C@@H]1C2(C)C	InChI=1S/C10H16/c1-7-4-5-8-6-9(7)10(8,2)3/h4,8-9H,5-6H2,1-3H3/t8-,9-/m0/s1	InChI=1S/C10H16/c1-7-4-5-8-6-9(7)10(8,2)3/h4,8-9H,5-6H2,1-3H3/t8-,9-/m0/s1	C10H16	136.125			129.596	Lite	0	0	0	0	0	0	0	0	0	0
DTXCID006501	alpha-Pinene	80-56-8	CC1=CCC2CC1C2(C)C	InChI=1/C10H16/c1-7-4-5-8-6-9(7)10(8,2)3/h4,8-9H,5-6H2,1-3H3	InChI=1/C10H16/c1-7-4-5-8-6-9(7)10(8,2)3/h4,8-9H,5-6H2,1-3H3	C10H16	136.125			129.679	Lite	0	0	0	0	0	0	0	0	0	0
DTXCID2027462	3-Carene	13466-78-9	CC1=CCC2C(C1)C2(C)C	InChI=1/C10H16/c1-7-4-5-8-9(6-7)10(8,2)3/h4,8-9H,5-6H2,1-3H3	InChI=1/C10H16/c1-7-4-5-8-9(6-7)10(8,2)3/h4,8-9H,5-6H2,1-3H3	C10H16	136.125			132.553	Lite	0	0	0	0	0	0	0	0	0	0
DTXCID2027593	alpha-Phellandrene	99-83-2	CC(C)C1CC=C(C)C=C1	InChI=1/C10H16/c1-8(2)10-6-4-9(3)5-7-10/h4-6,8,10H,7H2,1-3H3	InChI=1/C10H16/c1-8(2)10-6-4-9(3)5-7-10/h4-6,8,10H,7H2,1-3H3	C10H16	136.125			132.204	Lite	0	0	0	0	0	0	0	0	0	0
DTXCID2027593	(R)-alpha-Phellandrene	4221-98-1	CC(C)[C@H]1CC=C(C)C=C1	InChI=1S/C10H16/c1-8(2)10-6-4-9(3)5-7-10/h4-6,8,10H,7H2,1-3H3/t10-/m1/s1	InChI=1S/C10H16/c1-8(2)10-6-4-9(3)5-7-10/h4-6,8,10H,7H2,1-3H3/t10-/m1/s1	C10H16	136.125			132.38	Lite	0	0	0	0	0	0	0	0	0	0
DTXCID205692	Myrcene	123-35-3	CC(C)=CCCC(=C)C=C	InChI=1S/C10H16/c1-5-10(4)8-6-7-9(2)3/h5,7H,1,4,6,8H2,2-3H3	InChI=1S/C10H16/c1-5-10(4)8-6-7-9(2)3/h5,7H,1,4,6,8H2,2-3H3	C10H16	136.125			136.357	Lite	0	0	0	0	0	0	0	0	0	0
DTXCID209612	(S)-Limonene	5989-54-8	CC(=C)[C@H]1CCC(C)=CC1	InChI=1S/C10H16/c1-8(2)10-6-4-9(3)5-7-10/h4,10H,1,5-7H2,2-3H3/t10-/m1/s1	InChI=1S/C10H16/c1-8(2)10-6-4-9(3)5-7-10/h4,10H,1,5-7H2,2-3H3/t10-/m1/s1	C10H16	136.125			131.812	Lite	0	0	0	0	0	0	0	0	0	0
DTXCID209612	Limonene	138-86-3	CC(=C)C1CCC(C)=CC1	InChI=1/C10H16/c1-8(2)10-6-4-9(3)5-7-10/h4,10H,1,5-7H2,2-3H3	InChI=1/C10H16/c1-8(2)10-6-4-9(3)5-7-10/h4,10H,1,5-7H2,2-3H3	C10H16	136.125			134.221	Lite	0	0	0	0	0	0	0	0	0	0
DTXCID209612	D-Limonene	5989-27-5	CC(=C)[C@@H]1CCC(C)=CC1	InChI=1S/C10H16/c1-8(2)10-6-4-9(3)5-7-10/h4,10H,1,5-7H2,2-3H3/t10-/m0/s1	InChI=1S/C10H16/c1-8(2)10-6-4-9(3)5-7-10/h4,10H,1,5-7H2,2-3H3/t10-/m0/s1	C10H16	136.125			132.386	Lite	0	0	0	0	0	0	0	0	0	0
DTXCID4021210	gamma-Terpinene	99-85-4	CC(C)C1=CCC(C)=CC1	InChI=1S/C10H16/c1-8(2)10-6-4-9(3)5-7-10/h4,7-8H,5-6H2,1-3H3	InChI=1S/C10H16/c1-8(2)10-6-4-9(3)5-7-10/h4,7-8H,5-6H2,1-3H3	C10H16	136.125			134.54	Lite	0	0	0	0	0	0	0	0	0	0
DTXCID507049	(-)-beta-Pinene	18172-67-3	CC1(C)[C@@H]2C[C@H]1C(=C)CC2	InChI=1S/C10H16/c1-7-4-5-8-6-9(7)10(8,2)3/h8-9H,1,4-6H2,2-3H3/t8-,9-/m0/s1	InChI=1S/C10H16/c1-7-4-5-8-6-9(7)10(8,2)3/h8-9H,1,4-6H2,2-3H3/t8-,9-/m0/s1	C10H16	136.125				NA	0	0	0	0	0	0	0	0	0	0
DTXCID507049	beta-Pinene	127-91-3	CC1(C)C2CC1C(=C)CC2	InChI=1/C10H16/c1-7-4-5-8-6-9(7)10(8,2)3/h8-9H,1,4-6H2,2-3H3	InChI=1/C10H16/c1-7-4-5-8-6-9(7)10(8,2)3/h8-9H,1,4-6H2,2-3H3	C10H16	136.125				NA	0	0	0	0	0	0	0	0	0	0
DTXCID507222	Terpinolene	586-62-9	CC(C)=C1CCC(C)=CC1	InChI=1S/C10H16/c1-8(2)10-6-4-9(3)5-7-10/h4H,5-7H2,1-3H3	InChI=1S/C10H16/c1-8(2)10-6-4-9(3)5-7-10/h4H,5-7H2,1-3H3	C10H16	136.125			134.741	Lite	0	0	0	0	0	0	0	0	0	0
DTXCID7021237	alpha-Terpinene	99-86-5	CC(C)C1=CC=C(C)CC1	InChI=1S/C10H16/c1-8(2)10-6-4-9(3)5-7-10/h4,6,8H,5,7H2,1-3H3	InChI=1S/C10H16/c1-8(2)10-6-4-9(3)5-7-10/h4,6,8H,5,7H2,1-3H3	C10H16	136.125			134.421	Lite	0	0	0	0	0	0	0	0	0	0
DTXCID707288	2,6-Dimethyl-2,4,6-octatriene	673-84-7	CC=C(C)C=CC=C(C)C	InChI=1S/C10H16/c1-5-10(4)8-6-7-9(2)3/h5-8H,1-4H3	InChI=1S/C10H16/c1-5-10(4)8-6-7-9(2)3/h5-8H,1-4H3	C10H16	136.125			141.326	Lite	0	0	0	0	0	0	0	0	0	0
DTXCID2031166	2-Chlorobenzonitrile	873-32-5	ClC1=CC=CC=C1C#N	InChI=1S/C7H4ClN/c8-7-4-2-1-3-6(7)5-9/h1-4H	InChI=1S/C7H4ClN/c8-7-4-2-1-3-6(7)5-9/h1-4H	C7H4ClN	137.003			118.099	Lite	0	0	0	0	0	0	0	0	0	0
DTXCID6024703	4-Chlorobenzonitrile	623-03-0	ClC1=CC=C(C=C1)C#N	InChI=1S/C7H4ClN/c8-7-3-1-6(5-9)2-4-7/h1-4H	InChI=1S/C7H4ClN/c8-7-3-1-6(5-9)2-4-7/h1-4H	C7H4ClN	137.003			117.854	Lite	0	0	0	0	0	0	0	0	0	0
DTXCID001831	3-Nitrotoluene	99-08-1	CC1=CC(=CC=C1)[N+]([O-])=O	InChI=1S/C7H7NO2/c1-6-3-2-4-7(5-6)8(9)10/h2-5H,1H3	InChI=1S/C7H7NO2/c1-6-3-2-4-7(5-6)8(9)10/h2-5H,1H3	C7H7NO2	137.048	129.089	128.748	128.415	Lite	0	0	0	0	0	0	0	0	0	0
DTXCID005791	2-Nitrotoluene	88-72-2	CC1=CC=CC=C1[N+]([O-])=O	InChI=1S/C7H7NO2/c1-6-4-2-3-5-7(6)8(9)10/h2-5H,1H3	InChI=1S/C7H7NO2/c1-6-4-2-3-5-7(6)8(9)10/h2-5H,1H3	C7H7NO2	137.048	126.679	126.787	126.538	Lite	0	0	0	0	0	0	0	0	0	0
DTXCID20210583	Salicylaldehyde oxime	94-67-7	ON=CC1=C(O)C=CC=C1	InChI=1S/C7H7NO2/c9-7-4-2-1-3-6(7)5-8-10/h1-5,9-10H_x000D_	InChI=1S/C7H7NO2/c9-7-4-2-1-3-6(7)5-8-10/h1-5,9-10H	C7H7NO2	137.048	127.598	126.361	126.36	Lite	0	0	0	0	0	0	0	0	0	0
DTXCID203792	4-Nitrotoluene	99-99-0	CC1=CC=C(C=C1)[N+]([O-])=O	InChI=1S/C7H7NO2/c1-6-2-4-7(5-3-6)8(9)10/h2-5H,1H3	InChI=1S/C7H7NO2/c1-6-2-4-7(5-3-6)8(9)10/h2-5H,1H3	C7H7NO2	137.048	129.587	128.679	128.534	Lite	0	0	0	0	0	0	0	0	0	0
DTXCID305421	N-Hydroxybenzamide	495-18-1	ONC(=O)C1=CC=CC=C1	InChI=1S/C7H7NO2/c9-7(8-10)6-4-2-1-3-5-6/h1-5,10H,(H,8,9)	InChI=1S/C7H7NO2/c9-7(8-10)6-4-2-1-3-5-6/h1-5,10H,(H,8,9)	C7H7NO2	137.048	128.293	127.381	127.154	Lite	0	1	0	0	0	0	0	0	0	1
DTXCID404466	4-Aminobenzoic acid	150-13-0	NC1=CC=C(C=C1)C(O)=O	InChI=1S/C7H7NO2/c8-6-3-1-5(2-4-6)7(9)10/h1-4H,8H2,(H,9,10)	InChI=1S/C7H7NO2/c8-6-3-1-5(2-4-6)7(9)10/h1-4H,8H2,(H,9,10)	C7H7NO2	137.048	128.693	127.761	127.951	Lite	1	0	0	0	1	0	1	0	0	1
DTXCID501726	Salicylamide	65-45-2	NC(=O)C1=CC=CC=C1O	InChI=1S/C7H7NO2/c8-7(10)5-3-1-2-4-6(5)9/h1-4,9H,(H2,8,10)	InChI=1S/C7H7NO2/c8-7(10)5-3-1-2-4-6(5)9/h1-4,9H,(H2,8,10)	C7H7NO2	137.048	126.741	126.097	126.043	Lite	0	0	0	0	0	0	0	1	0	0
DTXCID5024471	Methyl nicotinate	93-60-7	COC(=O)C1=CN=CC=C1	InChI=1S/C7H7NO2/c1-10-7(9)6-3-2-4-8-5-6/h2-5H,1H3	InChI=1S/C7H7NO2/c1-10-7(9)6-3-2-4-8-5-6/h2-5H,1H3	C7H7NO2	137.048	128.117	127.703	126.913	Lite	0	0	0	0	0	0	0	0	0	0
DTXCID20755	Isoniazid	54-85-3	NNC(=O)C1=CC=NC=C1	InChI=1S/C6H7N3O/c7-9-6(10)5-1-3-8-4-2-5/h1-4H,7H2,(H,9,10)	InChI=1S/C6H7N3O/c7-9-6(10)5-1-3-8-4-2-5/h1-4H,7H2,(H,9,10)	C6H7N3O	137.059	128.498	127.739	127.858	Lite	0	0	0	0	0	0	0	0	0	0
DTXCID4030043	6-Aminonicotinamide	329-89-5	NC(=O)C1=CN=C(N)C=C1	InChI=1S/C6H7N3O/c7-5-2-1-4(3-9-5)6(8)10/h1-3H,(H2,7,9)(H2,8,10)	InChI=1S/C6H7N3O/c7-5-2-1-4(3-9-5)6(8)10/h1-3H,(H2,7,9)(H2,8,10)	C6H7N3O	137.059	127.152	127.648	127.556	Lite	0	0	0	0	0	0	0	0	0	0
DTXCID105101	3-Dimethylaminophenol	99-07-0	CN(C)C1=CC=CC(O)=C1	InChI=1S/C8H11NO/c1-9(2)7-4-3-5-8(10)6-7/h3-6,10H,1-2H3	InChI=1S/C8H11NO/c1-9(2)7-4-3-5-8(10)6-7/h3-6,10H,1-2H3	C8H11NO	137.084	132.631	142.195	129.419	Standard	0	0	1	0	0	0	0	0	1	0
DTXCID302198	3-(3-Pyridyl)-1-propanol	2859-67-8	OCCCC1=CN=CC=C1	InChI=1S/C8H11NO/c10-6-2-4-8-3-1-5-9-7-8/h1,3,5,7,10H,2,4,6H2	InChI=1S/C8H11NO/c10-6-2-4-8-3-1-5-9-7-8/h1,3,5,7,10H,2,4,6H2	C8H11NO	137.084	131.369	138.347	130.994	Standard	0	0	0	0	0	0	0	0	0	0
DTXCID30350	2-Methoxy-5-methylaniline	120-71-8	COC1=CC=C(C)C=C1N	InChI=1S/C8H11NO/c1-6-3-4-8(10-2)7(9)5-6/h3-5H,9H2,1-2H3	InChI=1S/C8H11NO/c1-6-3-4-8(10-2)7(9)5-6/h3-5H,9H2,1-2H3	C8H11NO	137.084	132.236	142.076	127.379	Standard	0	1	0	0	0	0	0	0	1	0
DTXCID505864	4-Ethoxyaniline	156-43-4	CCOC1=CC=C(N)C=C1	InChI=1S/C8H11NO/c1-2-10-8-5-3-7(9)4-6-8/h3-6H,2,9H2,1H3	InChI=1S/C8H11NO/c1-2-10-8-5-3-7(9)4-6-8/h3-6H,2,9H2,1H3	C8H11NO	137.084	138.274	146.059	129.772	Standard	0	0	0	0	0	0	0	0	0	0
DTXCID80349	4-Methoxy-2-methylaniline	102-50-1	COC1=CC(C)=C(N)C=C1	InChI=1S/C8H11NO/c1-6-5-7(10-2)3-4-8(6)9/h3-5H,9H2,1-2H3	InChI=1S/C8H11NO/c1-6-5-7(10-2)3-4-8(6)9/h3-5H,9H2,1-2H3	C8H11NO	137.084	136.626	144.228	127.191	Standard	1	0	0	0	1	0	1	0	1	0
DTXCID506174	Triallylamine	102-70-5	C=CCN(CC=C)CC=C	InChI=1S/C9H15N/c1-4-7-10(8-5-2)9-6-3/h4-6H,1-3,7-9H2	InChI=1S/C9H15N/c1-4-7-10(8-5-2)9-6-3/h4-6H,1-3,7-9H2	C9H15N	137.12	136.117	134.5		Lite	0	0	0	0	0	0	0	0	0	0
DTXCID90508	Dimethylarsinic acid	75-60-5	C[As](C)(O)=O	InChI=1S/C2H7AsO2/c1-3(2,4)5/h1-2H3,(H,4,5)	InChI=1S/C2H7AsO2/c1-3(2,4)5/h1-2H3,(H,4,5)	C2H7AsO2	137.966			99.583	Lite	0	0	0	0	0	0	0	0	0	0
DTXCID904657	3-Bromo-1-propanol	627-18-9	OCCCBr	InChI=1S/C3H7BrO/c4-2-1-3-5/h5H,1-3H2	InChI=1S/C3H7BrO/c4-2-1-3-5/h5H,1-3H2	C3H7BrO	137.968	105.875	104.951	104.766	Lite	0	0	0	0	0	0	0	0	0	0
DTXCID101806	2,4-Dihydroxybenzaldehyde	95-01-2	OC1=CC(O)=C(C=O)C=C1	InChI=1S/C7H6O3/c8-4-5-1-2-6(9)3-7(5)10/h1-4,9-10H_x000D_	InChI=1S/C7H6O3/c8-4-5-1-2-6(9)3-7(5)10/h1-4,9-10H	C7H6O3	138.032	127.667	127.493	127.119	Lite	0	0	0	0	0	0	0	0	0	0
DTXCID206368	Salicylic acid	69-72-7	OC(=O)C1=C(O)C=CC=C1	InChI=1S/C7H6O3/c8-6-4-2-1-3-5(6)7(9)10/h1-4,8H,(H,9,10)	InChI=1S/C7H6O3/c8-6-4-2-1-3-5(6)7(9)10/h1-4,8H,(H,9,10)	C7H6O3	138.032	127.042	125.889	125.711	Lite	0	0	0	0	0	0	1	0	0	1
DTXCID806647	4-Hydroxybenzoic acid	99-96-7	OC(=O)C1=CC=C(O)C=C1	InChI=1S/C7H6O3/c8-6-3-1-5(2-4-6)7(9)10/h1-4,8H,(H,9,10)	InChI=1S/C7H6O3/c8-6-3-1-5(2-4-6)7(9)10/h1-4,8H,(H,9,10)	C7H6O3	138.032	129.939	128.003	127.343	Lite	0	0	0	0	0	0	0	1	0	1
DTXCID1027215	Cupferron	135-20-6	[NH4+].[O-]N(N=O)C1=CC=CC=C1	InChI=1S/C6H5N2O2.H3N/c9-7-8(10)6-4-2-1-3-5-6;/h1-5H;1H3/q-1;/p+1	InChI=1S/C6H6N2O2/c9-7-8(10)6-4-2-1-3-5-6/h1-5,10H	C6H6N2O2	138.043	127.072	126.233	126.501	Lite	0	0	0	0	0	0	0	0	0	0
DTXCID40961	4-Nitroaniline	100-01-6	NC1=CC=C(C=C1)[N+]([O-])=O	InChI=1S/C6H6N2O2/c7-5-1-3-6(4-2-5)8(9)10/h1-4H,7H2	InChI=1S/C6H6N2O2/c7-5-1-3-6(4-2-5)8(9)10/h1-4H,7H2	C6H6N2O2	138.043	128.034	127.286	127.125	Lite	0	0	0	0	0	1	0	0	0	1
DTXCID905726	2-Nitroaniline	88-74-4	NC1=CC=CC=C1[N+]([O-])=O	InChI=1S/C6H6N2O2/c7-5-3-1-2-4-6(5)8(9)10/h1-4H,7H2	InChI=1S/C6H6N2O2/c7-5-3-1-2-4-6(5)8(9)10/h1-4H,7H2	C6H6N2O2	138.043	126.225	125.556	125.766	Lite	0	0	0	0	0	0	1	0	0	1
DTXCID7021861	Diethyl phosphite	762-04-9	CCOP(O)OCC	InChI=1S/C4H11O3P/c1-3-6-8(5)7-4-2/h5H,3-4H2,1-2H3	InChI=1S/C4H11O3P/c1-3-6-8(5)7-4-2/h5H,3-4H2,1-2H3	C4H11O3P	138.045	128.591	130.005	129.457	Lite	0	0	0	0	0	0	0	0	0	0
DTXCID0022276	2-Ethoxyphenol	94-71-3	CCOC1=C(O)C=CC=C1	InChI=1S/C8H10O2/c1-2-10-8-6-4-3-5-7(8)9/h3-6,9H,2H2,1H3	InChI=1S/C8H10O2/c1-2-10-8-6-4-3-5-7(8)9/h3-6,9H,2H2,1H3	C8H10O2	138.068	129.379	129.067	128.753	Lite	0	0	0	0	0	0	0	0	0	0
DTXCID0027060	1,3-Dimethoxybenzene	151-10-0	COC1=CC(OC)=CC=C1	InChI=1S/C8H10O2/c1-9-7-4-3-5-8(6-7)10-2/h3-6H,1-2H3	InChI=1S/C8H10O2/c1-9-7-4-3-5-8(6-7)10-2/h3-6H,1-2H3	C8H10O2	138.068	131.468	131.183	131.128	Lite	0	0	0	0	0	0	0	0	0	0
DTXCID102014	Hydroquinone dimethyl ether	150-78-7	COC1=CC=C(OC)C=C1	InChI=1S/C8H10O2/c1-9-7-3-5-8(10-2)6-4-7/h3-6H,1-2H3	InChI=1S/C8H10O2/c1-9-7-3-5-8(10-2)6-4-7/h3-6H,1-2H3	C8H10O2	138.068	132.158	131.447	131.424	Lite	0	0	0	0	0	0	0	0	0	0
DTXCID1024251	4-Ethoxyphenol	622-62-8	CCOC1=CC=C(O)C=C1	InChI=1S/C8H10O2/c1-2-10-8-5-3-7(9)4-6-8/h3-6,9H,2H2,1H3	InChI=1S/C8H10O2/c1-2-10-8-5-3-7(9)4-6-8/h3-6,9H,2H2,1H3	C8H10O2	138.068	132.912	130.84	130.948	Lite	0	0	0	0	0	0	0	0	0	0
DTXCID401976	2-Phenoxyethanol	122-99-6	OCCOC1=CC=CC=C1	InChI=1S/C8H10O2/c9-6-7-10-8-4-2-1-3-5-8/h1-5,9H,6-7H2	InChI=1S/C8H10O2/c9-6-7-10-8-4-2-1-3-5-8/h1-5,9H,6-7H2	C8H10O2	138.068	129.389	129.07	128.814	Lite	0	0	0	0	0	0	0	0	0	0
DTXCID4024357	(4-Methoxyphenyl)methanol	105-13-5	COC1=CC=C(CO)C=C1	InChI=1S/C8H10O2/c1-10-8-4-2-7(6-9)3-5-8/h2-5,9H,6H2,1H3	InChI=1S/C8H10O2/c1-10-8-4-2-7(6-9)3-5-8/h2-5,9H,6H2,1H3	C8H10O2	138.068	132.28	131.737	131.479	Lite	0	0	0	0	0	0	0	0	0	0
DTXCID4027105	2-Methoxy-4-methylphenol	93-51-6	COC1=CC(C)=CC=C1O	InChI=1S/C8H10O2/c1-6-3-4-7(9)8(5-6)10-2/h3-5,9H,1-2H3	InChI=1S/C8H10O2/c1-6-3-4-7(9)8(5-6)10-2/h3-5,9H,1-2H3	C8H10O2	138.068	130.848	130.814	130.885	Lite	0	0	0	0	0	0	0	0	0	0
DTXCID4031015	4-(2-Furyl)butan-2-one	699-17-2	CC(=O)CCC1=CC=CO1	InChI=1S/C8H10O2/c1-7(9)4-5-8-3-2-6-10-8/h2-3,6H,4-5H2,1H3_x000D_	InChI=1S/C8H10O2/c1-7(9)4-5-8-3-2-6-10-8/h2-3,6H,4-5H2,1H3	C8H10O2	138.068	129.618	129.459	129.146	Lite	0	0	0	0	0	0	0	0	0	0
DTXCID5027065	1,2-Dimethoxybenzene	91-16-7	COC1=CC=CC=C1OC	InChI=1S/C8H10O2/c1-9-7-5-3-4-6-8(7)10-2/h3-6H,1-2H3	InChI=1S/C8H10O2/c1-9-7-5-3-4-6-8(7)10-2/h3-6H,1-2H3	C8H10O2	138.068	130.109	129.94	129.493	Lite	0	0	0	0	0	0	0	0	0	0
DTXCID6022422	Styrene glycol	93-56-1	OCC(O)C1=CC=CC=C1	InChI=1/C8H10O2/c9-6-8(10)7-4-2-1-3-5-7/h1-5,8-10H,6H2	InChI=1/C8H10O2/c9-6-8(10)7-4-2-1-3-5-7/h1-5,8-10H,6H2	C8H10O2	138.068	130.17	128.827	128.952	Lite	0	0	0	0	0	0	0	0	0	0
DTXCID9027443	3-Methoxy-5-methylphenol	3209-13-0	COC1=CC(C)=CC(O)=C1	InChI=1S/C8H10O2/c1-6-3-7(9)5-8(4-6)10-2/h3-5,9H,1-2H3	InChI=1S/C8H10O2/c1-6-3-7(9)5-8(4-6)10-2/h3-5,9H,1-2H3	C8H10O2	138.068	132.26	131.837	131.648	Lite	0	0	0	0	0	0	0	0	0	0
DTXCID3021358	2,4-Diaminoanisole sulfate hydrate	123333-56-2	O.OS(O)(=O)=O.COC1=CC=C(N)C=C1N	InChI=1S/C7H10N2O.H2O4S.H2O/c1-10-7-3-2-5(8)4-6(7)9;1-5(2,3)4;/h2-4H,8-9H2,1H3;(H2,1,2,3,4);1H2	InChI=1S/C7H10N2O/c1-10-7-3-2-5(8)4-6(7)9/h2-4H,8-9H2,1H3	C7H10N2O	138.079	130.738	129.651	129.565	Lite	0	0	0	0	0	0	0	0	0	0
DTXCID3024574	2,4-Dimethylcyclohex-3-ene-1-carbaldehyde	68039-49-6	CC1C=C(C)CCC1C=O	InChI=1/C9H14O/c1-7-3-4-9(6-10)8(2)5-7/h5-6,8-9H,3-4H2,1-2H3	InChI=1/C9H14O/c1-7-3-4-9(6-10)8(2)5-7/h5-6,8-9H,3-4H2,1-2H3	C9H14O	138.105	132.909	132.208	131.854	Lite	0	0	0	0	0	0	0	0	0	0
DTXCID30911716	trans-2,cis-6-Nonadienal	557-48-2	CCCC\C=C\C=C/C=O	InChI=1S/C9H14O/c1-2-3-4-5-6-7-8-9-10/h5-9H,2-4H2,1H3/b6-5+,8-7-	InChI=1S/C9H14O/c1-2-3-4-5-6-7-8-9-10/h5-9H,2-4H2,1H3/b6-5+,8-7?	C9H14O	138.105	144.232	143.531	143.196	Lite	0	0	0	0	0	0	0	0	0	0
DTXCID40759	Isophorone	78-59-1	CC1=CC(=O)CC(C)(C)C1	InChI=1S/C9H14O/c1-7-4-8(10)6-9(2,3)5-7/h4H,5-6H2,1-3H3	InChI=1S/C9H14O/c1-7-4-8(10)6-9(2,3)5-7/h4H,5-6H2,1-3H3	C9H14O	138.105	132.361	131.733	131.585	Lite	0	0	0	0	0	0	0	0	0	0
DTXCID7027679	2-Pentylfuran	3777-69-3	CCCCCC1=CC=CO1	InChI=1S/C9H14O/c1-2-3-4-6-9-7-5-8-10-9/h5,7-8H,2-4,6H2,1H3	InChI=1S/C9H14O/c1-2-3-4-6-9-7-5-8-10-9/h5,7-8H,2-4,6H2,1H3	C9H14O	138.105	132.933	133.054	132.128	Lite	0	0	0	0	0	0	0	0	0	0
DTXCID705922	Pinane	473-55-2	CC1CCC2CC1C2(C)C	InChI=1/C10H18/c1-7-4-5-8-6-9(7)10(8,2)3/h7-9H,4-6H2,1-3H3	InChI=1/C10H18/c1-7-4-5-8-6-9(7)10(8,2)3/h7-9H,4-6H2,1-3H3	C10H18	138.141				NA	0	0	0	0	0	0	0	0	0	0
DTXCID809234	(S)-Citronellene	10281-55-7	C[C@@H](CCC=C(C)C)C=C	InChI=1S/C10H18/c1-5-10(4)8-6-7-9(2)3/h5,7,10H,1,6,8H2,2-4H3/t10-/m1/s1	InChI=1S/C10H18/c1-5-10(4)8-6-7-9(2)3/h5,7,10H,1,6,8H2,2-4H3/t10-/m1/s1	C10H18	138.141			140.812	Lite	0	0	0	0	0	0	0	0	0	0
DTXCID3024609	2,6-Difluorobenzonitrile	1897-52-5	FC1=CC=CC(F)=C1C#N	InChI=1S/C7H3F2N/c8-6-2-1-3-7(9)5(6)4-10/h1-3H	InChI=1S/C7H3F2N/c8-6-2-1-3-7(9)5(6)4-10/h1-3H	C7H3F2N	139.023			117.62	Lite	0	0	0	0	0	0	0	0	0	0
DTXCID201790, DTXCID201790	Sodium 2-nitrophenolate, 2-Nitrophenol	824-39-5, 88-75-5	[Na+].[O-]C1=C(C=CC=C1)[N+]([O-])=O	InChI=1S/C6H5NO3.Na/c8-6-4-2-1-3-5(6)7(9)10;/h1-4,8H;/q;+1/p-1	InChI=1S/C6H5NO3/c8-6-4-2-1-3-5(6)7(9)10/h1-4,8H	C6H5NO3	139.027	125.946	125.446	125.369	Lite	0	0	0	0	1	0	0	0	0	1
DTXCID201834, DTXCID201834	Sodium 4-nitrophenolate, 4-Nitrophenol	824-78-2, 100-02-7	[Na+].[O-]C1=CC=C(C=C1)[N+]([O-])=O	InChI=1S/C6H5NO3.Na/c8-6-3-1-5(2-4-6)7(9)10;/h1-4,8H;/q;+1/p-1	InChI=1S/C6H5NO3/c8-6-3-1-5(2-4-6)7(9)10/h1-4,8H	C6H5NO3	139.027	127.587	126.935	126.978	Lite	0	0	0	1	0	1	0	0	0	1
DTXCID9021423	1-Ethenylazepan-2-one	2235-00-9	C=CN1CCCCCC1=O	InChI=1S/C8H13NO/c1-2-9-7-5-3-4-6-8(9)10/h2H,1,3-7H2	InChI=1S/C8H13NO/c1-2-9-7-5-3-4-6-8(9)10/h2H,1,3-7H2	C8H13NO	139.1	130.396	130.285	130.11	Lite	0	0	0	0	0	0	0	0	0	0
DTXCID8030683	4-Chlorobutyryl chloride	4635-59-0	ClCCCC(Cl)=O	InChI=1S/C4H6Cl2O/c5-3-1-2-4(6)7/h1-3H2_x000D_	InChI=1S/C4H6Cl2O/c5-3-1-2-4(6)7/h1-3H2	C4H6Cl2O	139.98	109.079	108.695	108.016	Lite	0	0	0	0	0	0	0	0	0	0
DTXCID7021524	4-Nitropyridine-1-oxide	1124-33-0	[O-][N+](=O)C1=CC=[N+]([O-])C=C1	InChI=1S/C5H4N2O3/c8-6-3-1-5(2-4-6)7(9)10/h1-4H	InChI=1S/C5H4N2O3/c8-6-3-1-5(2-4-6)7(9)10/h1-4H	C5H4N2O3	140.022	127.12	126.219	125.83	Lite	0	0	0	0	0	0	0	0	0	0
DTXCID101403	Trimethyl phosphate	512-56-1	COP(=O)(OC)OC	InChI=1S/C3H9O4P/c1-5-8(4,6-2)7-3/h1-3H3	InChI=1S/C3H9O4P/c1-5-8(4,6-2)7-3/h1-3H3	C3H9O4P	140.024	125.345	124.653	123.999	Lite	0	0	0	0	0	0	0	0	0	0
DTXCID0030081	4-Methylbenzyl chloride	104-82-5	CC1=CC=C(CCl)C=C1	InChI=1S/C8H9Cl/c1-7-2-4-8(6-9)5-3-7/h2-5H,6H2,1H3	InChI=1S/C8H9Cl/c1-7-2-4-8(6-9)5-3-7/h2-5H,6H2,1H3	C8H9Cl	140.039			121.518	Lite	0	0	0	0	0	0	0	0	0	0
DTXCID3024441	1-(Chloromethyl)-2-methylbenzene	552-45-4	CC1=CC=CC=C1CCl	InChI=1S/C8H9Cl/c1-7-4-2-3-5-8(7)6-9/h2-5H,6H2,1H3	InChI=1S/C8H9Cl/c1-7-4-2-3-5-8(7)6-9/h2-5H,6H2,1H3	C8H9Cl	140.039			120.073	Lite	0	0	0	0	0	0	0	0	0	0
DTXCID2027705	(Methylthio)methylpyrazine	67952-65-2	CSC1=CN=C(C)C=N1	InChI=1S/C6H8N2S/c1-5-3-8-6(9-2)4-7-5/h3-4H,1-2H3	InChI=1S/C6H8N2S/c1-5-3-8-6(9-2)4-7-5/h3-4H,1-2H3	C6H8N2S	140.041	128.755	128.308	127.897	Lite	0	0	0	0	0	0	0	0	0	0
DTXCID205977	Pyrazineethanethiol	35250-53-4	SCCC1=CN=CC=N1	InChI=1S/C6H8N2S/c9-4-1-6-5-7-2-3-8-6/h2-3,5,9H,1,4H2	InChI=1S/C6H8N2S/c9-4-1-6-5-7-2-3-8-6/h2-3,5,9H,1,4H2	C6H8N2S	140.041	126.952	126.204	125.642	Lite	0	0	0	0	0	0	0	0	0	0
DTXCID3021516	2-Ethyl-3-hydroxy-4H-pyran-4-one	4940-11-08	CCC1=C(O)C(=O)C=CO1	InChI=1S/C7H8O3/c1-2-6-7(9)5(8)3-4-10-6/h3-4,9H,2H2,1H3	InChI=1S/C7H8O3/c1-2-6-7(9)5(8)3-4-10-6/h3-4,9H,2H2,1H3	C7H8O3	140.047	126.78	126.644	126.578	Lite	0	0	0	0	0	0	0	0	0	0
DTXCID705346	Furfuryl acetate	623-17-6	CC(=O)OCC1=CC=CO1	InChI=1S/C7H8O3/c1-6(8)10-5-7-3-2-4-9-7/h2-4H,5H2,1H3	InChI=1S/C7H8O3/c1-6(8)10-5-7-3-2-4-9-7/h2-4H,5H2,1H3	C7H8O3	140.047	128.838	128.661	128.102	Lite	0	0	0	0	0	0	0	0	0	0
DTXCID2021230	2-Methyl-4-amino-6-methoxy-s-triazine	1668-54-8	COC1=NC(C)=NC(N)=N1	InChI=1S/C5H8N4O/c1-3-7-4(6)9-5(8-3)10-2/h1-2H3,(H2,6,7,8,9)	InChI=1S/C5H8N4O/c1-3-7-4(6)9-5(8-3)10-2/h1-2H3,(H2,6,7,8,9)	C5H8N4O	140.07	129.477	130.27	129.997	Lite	0	0	0	0	0	0	1	0	0	0
DTXCID2024745	2,2,4,4-Tetramethylcyclobutane-1,3-dione	933-52-8	CC1(C)C(=O)C(C)(C)C1=O	InChI=1S/C8H12O2/c1-7(2)5(9)8(3,4)6(7)10/h1-4H3	InChI=1S/C8H12O2/c1-7(2)5(9)8(3,4)6(7)10/h1-4H3	C8H12O2	140.084	130.315	130.875		Lite	0	0	0	0	0	0	0	0	0	0
DTXCID80604	4-Vinyl-1-cyclohexene dioxide	106-87-6	C1OC1C1CCC2OC2C1	InChI=1/C8H12O2/c1-2-6-7(10-6)3-5(1)8-4-9-8/h5-8H,1-4H2	InChI=1/C8H12O2/c1-2-6-7(10-6)3-5(1)8-4-9-8/h5-8H,1-4H2	C8H12O2	140.084	128.562	128.19	128.267	Lite	0	0	0	0	0	0	0	0	0	0
DTXCID00692	Methenamine	100-97-0	C1N2CN3CN1CN(C2)C3	InChI=1S/C6H12N4/c1-7-2-9-4-8(1)5-10(3-7)6-9/h1-6H2	InChI=1S/C6H12N4/c1-7-2-9-4-8(1)5-10(3-7)6-9/h1-6H2	C6H12N4	140.106	121.151	120.655	120.367	Lite	0	0	0	0	0	0	0	0	0	0
DTXCID10210193	trans-2,cis-6-Nonadien-1-ol	28069-72-9	CC\C=C/CC\C=C\CO	InChI=1S/C9H16O/c1-2-3-4-5-6-7-8-9-10/h3-4,7-8,10H,2,5-6,9H2,1H3/b4-3-,8-7+	InChI=1S/C9H16O/c1-2-3-4-5-6-7-8-9-10/h3-4,7-8,10H,2,5-6,9H2,1H3/b4-3-,8-7+	C9H16O	140.12	144.789	143.993	143.636	Lite	0	0	0	0	0	0	0	0	0	0
DTXCID3024996	3,3,5-Trimethylcyclohexanone	873-94-9	CC1CC(=O)CC(C)(C)C1	InChI=1/C9H16O/c1-7-4-8(10)6-9(2,3)5-7/h7H,4-6H2,1-3H3	InChI=1/C9H16O/c1-7-4-8(10)6-9(2,3)5-7/h7H,4-6H2,1-3H3	C9H16O	140.12	130.102	130.078	130.035	Lite	0	0	0	0	0	0	0	0	0	0
DTXCID3030638	8-Nonenal	39770-04-2	C=CCCCCCCC=O	InChI=1S/C9H16O/c1-2-3-4-5-6-7-8-9-10/h2,9H,1,3-8H2_x000D_	InChI=1S/C9H16O/c1-2-3-4-5-6-7-8-9-10/h2,9H,1,3-8H2	C9H16O	140.12	140.775	139.797	139.743	Lite	0	0	0	0	0	0	0	0	0	0
DTXCID4027072	3,5,5-Trimethyl-2-cyclohexen-1-ol	470-99-5	CC1=CC(O)CC(C)(C)C1	InChI=1/C9H16O/c1-7-4-8(10)6-9(2,3)5-7/h4,8,10H,5-6H2,1-3H3	InChI=1/C9H16O/c1-7-4-8(10)6-9(2,3)5-7/h4,8,10H,5-6H2,1-3H3	C9H16O	140.12	132.104	131.636	131.775	Lite	0	0	0	0	0	0	0	0	0	0
DTXCID4028173	4-Propylcyclohexanone	40649-36-3	CCCC1CCC(=O)CC1	InChI=1S/C9H16O/c1-2-3-8-4-6-9(10)7-5-8/h8H,2-7H2,1H3	InChI=1S/C9H16O/c1-2-3-8-4-6-9(10)7-5-8/h8H,2-7H2,1H3	C9H16O	140.12	134.296	134.49	133.852	Lite	0	0	0	0	0	0	0	0	0	0
DTXCID60210466	(Z)-Non-6-enal	2277-19-2	CC\C=C/CCCCC=O	InChI=1S/C9H16O/c1-2-3-4-5-6-7-8-9-10/h3-4,9H,2,5-8H2,1H3/b4-3-_x000D_	InChI=1S/C9H16O/c1-2-3-4-5-6-7-8-9-10/h3-4,9H,2,5-8H2,1H3/b4-3-	C9H16O	140.12	141.834	141.389	141.148	Lite	0	0	0	0	0	0	0	0	0	0
DTXCID6024753	2,6-Dimethylhept-5-enal	106-72-9	CC(CCC=C(C)C)C=O	InChI=1/C9H16O/c1-8(2)5-4-6-9(3)7-10/h5,7,9H,4,6H2,1-3H3	InChI=1/C9H16O/c1-8(2)5-4-6-9(3)7-10/h5,7,9H,4,6H2,1-3H3	C9H16O	140.12	140.783	140.509	140.217	Lite	0	0	0	0	0	0	0	0	0	0
DTXCID8027086	(E)-2-Nonenal	18829-56-6	CCCCCC\C=C\C=O	InChI=1S/C9H16O/c1-2-3-4-5-6-7-8-9-10/h7-9H,2-6H2,1H3/b8-7+	InChI=1S/C9H16O/c1-2-3-4-5-6-7-8-9-10/h7-9H,2-6H2,1H3/b8-7+	C9H16O	140.12	142.477	142.132	141.735	Lite	0	0	0	0	0	0	0	0	0	0
DTXCID107789	O,O-Dimethyl phosphoramidothioate	17321-47-0	COP(N)(=S)OC	InChI=1S/C2H8NO2PS/c1-4-6(3,7)5-2/h1-2H3,(H2,3,7)	InChI=1S/C2H8NO2PS/c1-4-6(3,7)5-2/h1-2H3,(H2,3,7)	C2H8NO2PS	141.001			121.029	Lite	0	0	0	0	0	0	0	0	0	0
DTXCID504177	Methamidophos	10265-92-6	COP(N)(=O)SC	InChI=1/C2H8NO2PS/c1-5-6(3,4)7-2/h1-2H3,(H2,3,4)	InChI=1/C2H8NO2PS/c1-5-6(3,4)7-2/h1-2H3,(H2,3,4)	C2H8NO2PS	141.001			123.27	Lite	0	0	0	0	0	0	0	0	0	0
DTXCID1024469	2-Aminoethyl hydrogen sulfate	926-39-6	NCCOS(O)(=O)=O	InChI=1S/C2H7NO4S/c3-1-2-7-8(4,5)6/h1-3H2,(H,4,5,6)	InChI=1S/C2H7NO4S/c3-1-2-7-8(4,5)6/h1-3H2,(H,4,5,6)	C2H7NO4S	141.01	123.345	122.605	122.449	Lite	0	0	0	0	0	0	0	0	0	0
DTXCID70109519	Bis(2-chloroethyl)amine hydrochloride	821-48-7	Cl.ClCCNCCCl	InChI=1S/C4H9Cl2N.ClH/c5-1-3-7-4-2-6;/h7H,1-4H2;1H	InChI=1S/C4H9Cl2N/c5-1-3-7-4-2-6/h7H,1-4H2	C4H9Cl2N	141.011	112.569	111.782	111.625	Lite	0	0	0	0	0	0	0	0	0	0
DTXCID60286	3-Chloro-4-methylaniline	95-74-9	CC1=C(Cl)C=C(N)C=C1	InChI=1S/C7H8ClN/c1-5-2-3-6(9)4-7(5)8/h2-4H,9H2,1H3	InChI=1S/C7H8ClN/c1-5-2-3-6(9)4-7(5)8/h2-4H,9H2,1H3	C7H8ClN	141.035	121.009	120.389	120.078	Lite	0	0	0	0	0	0	0	1	0	1
DTXCID9021508, DTXCID9021508	4-Chloro-2-methylaniline, 4-Chloro-2-methylaniline hydrochloride	95-69-2, 3165-93-3	CC1=C(N)C=CC(Cl)=C1	InChI=1S/C7H8ClN/c1-5-4-6(8)2-3-7(5)9/h2-4H,9H2,1H3	InChI=1S/C7H8ClN/c1-5-4-6(8)2-3-7(5)9/h2-4H,9H2,1H3	C7H8ClN	141.035	119.843	118.9	118.851	Lite	1	0	0	0	1	0	1	0	0	1
DTXCID30497	1,2-Dimethyl-5-nitroimidazole	551-92-8	CN1C(C)=NC=C1[N+]([O-])=O	InChI=1S/C5H7N3O2/c1-4-6-3-5(7(4)2)8(9)10/h3H,1-2H3	InChI=1S/C5H7N3O2/c1-4-6-3-5(7(4)2)8(9)10/h3H,1-2H3	C5H7N3O2	141.054	127.936	127.659	127.472	Lite	0	0	0	0	0	0	0	1	0	0
DTXCID8024947	1-(Morpholin-4-yl)prop-2-en-1-one	5117-12-04	C=CC(=O)N1CCOCC1	InChI=1S/C7H11NO2/c1-2-7(9)8-3-5-10-6-4-8/h2H,1,3-6H2	InChI=1S/C7H11NO2/c1-2-7(9)8-3-5-10-6-4-8/h2H,1,3-6H2	C7H11NO2	141.079	129.991	129.569	129.85	Lite	0	0	1	0	0	0	0	0	0	1
DTXCID9024439	Butyl cyanoacetate	5459-58-5	CCCCOC(=O)CC#N	InChI=1S/C7H11NO2/c1-2-3-6-10-7(9)4-5-8/h2-4,6H2,1H3	InChI=1S/C7H11NO2/c1-2-3-6-10-7(9)4-5-8/h2-4,6H2,1H3	C7H11NO2	141.079	133.755	133.81	132.813	Lite	0	1	0	0	0	0	0	0	0	1
DTXCID904775	1-Chloro-2-bromoethane	107-04-0	ClCCBr	InChI=1S/C2H4BrCl/c3-1-2-4/h1-2H2	InChI=1S/C2H4BrCl/c3-1-2-4/h1-2H2	C2H4BrCl	141.918			91.3574	Lite	0	0	0	0	0	0	0	0	0	0
DTXCID201575	Dalapon	75-99-0	CC(Cl)(Cl)C(O)=O	InChI=1S/C3H4Cl2O2/c1-3(4,5)2(6)7/h1H3,(H,6,7)	InChI=1S/C3H4Cl2O2/c1-3(4,5)2(6)7/h1H3,(H,6,7)	C3H4Cl2O2	141.959			107.118	Lite	0	0	0	0	0	0	0	0	0	0
DTXCID70168	Bis(2-chloroethyl) ether	111-44-4	ClCCOCCCl	InChI=1S/C4H8Cl2O/c5-1-3-7-4-2-6/h1-4H2	InChI=1S/C4H8Cl2O/c5-1-3-7-4-2-6/h1-4H2	C4H8Cl2O	141.995	111.469	125.547	110.12	Standard	0	0	0	0	0	0	0	0	0	0
DTXCID3024946	Pyrimidine-2,4,5,6(1H,3H)-tetrone tetrahydrate	6010-91-9	O.O.O.O.O=C1NC(=O)C(=O)C(=O)N1	InChI=1S/C4H2N2O4.4H2O/c7-1-2(8)5-4(10)6-3(1)9;;;;/h(H2,5,6,8,9,10);4*1H2	InChI=1S/C4H2N2O4/c7-1-2(8)5-4(10)6-3(1)9/h(H2,5,6,8,9,10)	C4H2N2O4	142.001	125.573	125.249	124.94	Lite	0	0	0	0	0	0	0	0	0	0
DTXCID502510	4-Chloro-2-methylphenol	1570-64-5	CC1=C(O)C=CC(Cl)=C1	InChI=1S/C7H7ClO/c1-5-4-6(8)2-3-7(5)9/h2-4,9H,1H3	InChI=1S/C7H7ClO/c1-5-4-6(8)2-3-7(5)9/h2-4,9H,1H3	C7H7ClO	142.018	119.554	118.733	118.713	Lite	0	0	0	0	1	0	0	0	0	1
DTXCID601717	4-Chloro-3-methylphenol	59-50-7	CC1=C(Cl)C=CC(O)=C1	InChI=1S/C7H7ClO/c1-5-4-6(9)2-3-7(5)8/h2-4,9H,1H3	InChI=1S/C7H7ClO/c1-5-4-6(9)2-3-7(5)8/h2-4,9H,1H3	C7H7ClO	142.018	121.112	120.203	119.917	Lite	0	0	0	1	0	0	0	0	0	1
DTXCID60890	6-Methyl-2-thiouracil	56-04-2	CC1=CC(=O)NC(=S)N1	InChI=1S/C5H6N2OS/c1-3-2-4(8)7-5(9)6-3/h2H,1H3,(H2,6,7,8,9)	InChI=1S/C5H6N2OS/c1-3-2-4(8)7-5(9)6-3/h2H,1H3,(H2,6,7,8,9)	C5H6N2OS	142.02	127.135	126.392	125.88	Lite	0	0	0	0	0	1	0	0	0	1
DTXCID6021959	Ethyl trifluoroacetate	383-63-1	CCOC(=O)C(F)(F)F	InChI=1S/C4H5F3O2/c1-2-9-3(8)4(5,6)7/h2H2,1H3	InChI=1S/C4H5F3O2/c1-2-9-3(8)4(5,6)7/h2H2,1H3	C4H5F3O2	142.024	114.224	113.869	113.549	Lite	0	0	0	0	0	0	0	0	0	0
DTXCID1023944	2-Chloro-1,4-diaminobenzene sulfate	61702-44-1	OS(O)(=O)=O.NC1=CC=C(N)C(Cl)=C1	InChI=1S/C6H7ClN2.H2O4S/c7-5-3-4(8)1-2-6(5)9;1-5(2,3)4/h1-3H,8-9H2;(H2,1,2,3,4)	InChI=1S/C6H7ClN2/c7-5-3-4(8)1-2-6(5)9/h1-3H,8-9H2	C6H7ClN2	142.03	119.815	119.095	118.686	Lite	0	0	0	0	0	0	0	0	0	0
DTXCID40282	4-Chloro-1,3-diaminobenzene	5131-60-2	NC1=CC(N)=C(Cl)C=C1	InChI=1S/C6H7ClN2/c7-5-2-1-4(8)3-6(5)9/h1-3H,8-9H2	InChI=1S/C6H7ClN2/c7-5-2-1-4(8)3-6(5)9/h1-3H,8-9H2	C6H7ClN2	142.03	119.76	119.119	118.554	Lite	0	0	0	0	0	0	0	0	0	0
DTXCID70283	4-Chloro-1,2-diaminobenzene	95-83-0	NC1=C(N)C=C(Cl)C=C1	InChI=1S/C6H7ClN2/c7-4-1-2-5(8)6(9)3-4/h1-3H,8-9H2	InChI=1S/C6H7ClN2/c7-4-1-2-5(8)6(9)3-4/h1-3H,8-9H2	C6H7ClN2	142.03	118.552	117.614	117.659	Lite	0	0	0	0	0	0	0	0	0	0
DTXCID4011380	Glycoluril	496-46-8	O=C1NC2NC(=O)NC2N1	InChI=1S/C4H6N4O2/c9-3-5-1-2(7-3)8-4(10)6-1/h1-2H,(H2,5,7,9)(H2,6,8,10)	InChI=1S/C4H6N4O2/c9-3-5-1-2(7-3)8-4(10)6-1/h1-2H,(H2,5,7,9)(H2,6,8,10)	C4H6N4O2	142.049	125.523	124.977	124.565	Lite	0	0	0	0	0	0	0	0	0	0
DTXCID305361	Glycidyl methacrylate	106-91-2	CC(=C)C(=O)OCC1CO1	InChI=1/C7H10O3/c1-5(2)7(8)10-4-6-3-9-6/h6H,1,3-4H2,2H3	InChI=1/C7H10O3/c1-5(2)7(8)10-4-6-3-9-6/h6H,1,3-4H2,2H3	C7H10O3	142.063	131.416	132.258	132.027	Lite	0	0	0	0	0	0	0	0	0	0
DTXCID4031013	5-Ethyl-3-hydroxy-4-methylfuran-2(5H)-one	698-10-2	CCC1OC(=O)C(O)=C1C	InChI=1S/C7H10O3/c1-3-5-4(2)6(8)7(9)10-5/h5,8H,3H2,1-2H3_x000D_	InChI=1/C7H10O3/c1-3-5-4(2)6(8)7(9)10-5/h4-5H,3H2,1-2H3	C7H10O3	142.063	130.209	129.664	129.261	Lite	0	0	0	0	0	0	0	0	0	0
DTXCID3024491	Piracetam	7491-74-9	NC(=O)CN1CCCC1=O	InChI=1S/C6H10N2O2/c7-5(9)4-8-3-1-2-6(8)10/h1-4H2,(H2,7,9)	InChI=1S/C6H10N2O2/c7-5(9)4-8-3-1-2-6(8)10/h1-4H2,(H2,7,9)	C6H10N2O2	142.074	129.941	129.474	129.455	Lite	0	0	0	0	0	0	0	1	0	1
DTXCID7021368	5-Ethyl-5-methylhydantoin	5394-36-5	CCC1(C)NC(=O)NC1=O	InChI=1/C6H10N2O2/c1-3-6(2)4(9)7-5(10)8-6/h3H2,1-2H3,(H2,7,8,9,10)	InChI=1/C6H10N2O2/c1-3-6(2)4(9)7-5(10)8-6/h3H2,1-2H3,(H2,7,8,9,10)	C6H10N2O2	142.074	129.198	129.46	128.248	Lite	0	0	0	0	0	0	1	0	0	1
DTXCID30877	1-Methylnaphthalene	90-12-0	CC1=C2C=CC=CC2=CC=C1	InChI=1S/C11H10/c1-9-5-4-7-10-6-2-3-8-11(9)10/h2-8H,1H3	InChI=1S/C11H10/c1-9-5-4-7-10-6-2-3-8-11(9)10/h2-8H,1H3	C11H10	142.078			129.769	Lite	0	0	0	0	0	0	0	0	0	0
DTXCID0027690	2-Methylpropyl but-2-enoate	589-66-2	CC=CC(=O)OCC(C)C	InChI=1S/C8H14O2/c1-4-5-8(9)10-6-7(2)3/h4-5,7H,6H2,1-3H3	InChI=1S/C8H14O2/c1-4-5-8(9)10-6-7(2)3/h4-5,7H,6H2,1-3H3	C8H14O2	142.099	139.07	138.374	137.904	Lite	0	0	0	0	0	0	0	0	0	0
DTXCID0030871	Cyclohexyl acetate	622-45-7	CC(=O)OC1CCCCC1	InChI=1S/C8H14O2/c1-7(9)10-8-5-3-2-4-6-8/h8H,2-6H2,1H3	InChI=1S/C8H14O2/c1-7(9)10-8-5-3-2-4-6-8/h8H,2-6H2,1H3	C8H14O2	142.099	132.801	132.246	131.598	Lite	0	0	0	0	0	0	0	0	0	0
DTXCID0048	Allyl isovalerate	2835-39-4	CC(C)CC(=O)OCC=C	InChI=1S/C8H14O2/c1-4-5-10-8(9)6-7(2)3/h4,7H,1,5-6H2,2-3H3	InChI=1S/C8H14O2/c1-4-5-10-8(9)6-7(2)3/h4,7H,1,5-6H2,2-3H3	C8H14O2	142.099	133.905	133.681	133.244	Lite	0	0	0	0	0	0	0	0	0	0
DTXCID20118313	4-Methylcyclohexanecarboxylic acid	4331-54-8	CC1CCC(CC1)C(O)=O	InChI=1S/C8H14O2/c1-6-2-4-7(5-3-6)8(9)10/h6-7H,2-5H2,1H3,(H,9,10)	InChI=1S/C8H14O2/c1-6-2-4-7(5-3-6)8(9)10/h6-7H,2-5H2,1H3,(H,9,10)	C8H14O2	142.099			130.719	Lite	0	0	0	0	0	0	0	0	0	0
DTXCID20209770	(3Z)-3-Hexenyl acetate	3681-71-8	CC\C=C/CCOC(C)=O	InChI=1S/C8H14O2/c1-3-4-5-6-7-10-8(2)9/h4-5H,3,6-7H2,1-2H3/b5-4-	InChI=1S/C8H14O2/c1-3-4-5-6-7-10-8(2)9/h4-5H,3,6-7H2,1-2H3/b5-4-	C8H14O2	142.099	135.932	136.958	136.817	Lite	0	0	0	0	0	0	0	0	0	0
DTXCID3027164	delta-Octanolactone	698-76-0	CCCC1CCCC(=O)O1	InChI=1/C8H14O2/c1-2-4-7-5-3-6-8(9)10-7/h7H,2-6H2,1H3	InChI=1/C8H14O2/c1-2-4-7-5-3-6-8(9)10-7/h7H,2-6H2,1H3	C8H14O2	142.099	133.803	133.908	133.471	Lite	0	0	0	0	0	0	0	0	0	0
DTXCID505461	Isobutyl methacrylate	97-86-9	CC(C)COC(=O)C(C)=C	InChI=1S/C8H14O2/c1-6(2)5-10-8(9)7(3)4/h6H,3,5H2,1-2,4H3	InChI=1S/C8H14O2/c1-6(2)5-10-8(9)7(3)4/h6H,3,5H2,1-2,4H3	C8H14O2	142.099	134.023	133.586	133.453	Lite	0	0	0	0	0	0	0	0	0	0
DTXCID704696	Butyl methacrylate	97-88-1	CCCCOC(=O)C(C)=C	InChI=1S/C8H14O2/c1-4-5-6-10-8(9)7(2)3/h2,4-6H2,1,3H3	InChI=1S/C8H14O2/c1-4-5-6-10-8(9)7(2)3/h2,4-6H2,1,3H3	C8H14O2	142.099	134.002	133.44	133.065	Lite	0	0	0	0	0	0	0	0	0	0
DTXCID9027609	4-Octanolide	104-50-7	CCCCC1CCC(=O)O1	InChI=1/C8H14O2/c1-2-3-4-7-5-6-8(9)10-7/h7H,2-6H2,1H3	InChI=1/C8H14O2/c1-2-3-4-7-5-6-8(9)10-7/h7H,2-6H2,1H3	C8H14O2	142.099	134.262	133.473	133.392	Lite	0	0	0	0	0	0	0	0	0	0
DTXCID601039	Nitrosoheptamethyleneimine	20917-49-1	O=NN1CCCCCCC1	InChI=1S/C7H14N2O/c10-8-9-6-4-2-1-3-5-7-9/h1-7H2	InChI=1S/C7H14N2O/c10-8-9-6-4-2-1-3-5-7-9/h1-7H2	C7H14N2O	142.111	131.084	129.135	128.939	Lite	0	0	0	0	0	0	0	0	0	0
DTXCID00210248	(6Z)-Non-6-en-1-ol	35854-86-5	CC\C=C/CCCCCO	InChI=1S/C9H18O/c1-2-3-4-5-6-7-8-9-10/h3-4,10H,2,5-9H2,1H3/b4-3-	InChI=1S/C9H18O/c1-2-3-4-5-6-7-8-9-10/h3-4,10H,2,5-9H2,1H3/b4-3-	C9H18O	142.136	142.691	142.051	142.172	Lite	0	0	0	0	0	0	0	0	0	0
DTXCID002125	2-Nonanone	821-55-6	CCCCCCCC(C)=O	InChI=1S/C9H18O/c1-3-4-5-6-7-8-9(2)10/h3-8H2,1-2H3	InChI=1S/C9H18O/c1-3-4-5-6-7-8-9(2)10/h3-8H2,1-2H3	C9H18O	142.136	140.181	140.015	139.855	Lite	0	0	0	0	0	0	0	0	0	0
DTXCID0027149	4-Isopropylcyclohexanol	4621-04-09	CC(C)C1CCC(O)CC1	InChI=1S/C9H18O/c1-7(2)8-3-5-9(10)6-4-8/h7-10H,3-6H2,1-2H3	InChI=1S/C9H18O/c1-7(2)8-3-5-9(10)6-4-8/h7-10H,3-6H2,1-2H3	C9H18O	142.136	133.023	132.544	132.727	Lite	0	0	0	0	0	0	0	0	0	0
DTXCID2021444	5-Methyl-2-octanone	58654-67-4	CCCC(C)CCC(C)=O	InChI=1/C9H18O/c1-4-5-8(2)6-7-9(3)10/h8H,4-7H2,1-3H3	InChI=1/C9H18O/c1-4-5-8(2)6-7-9(3)10/h8H,4-7H2,1-3H3	C9H18O	142.136	138.668	137.638	137.102	Lite	0	0	0	0	0	0	0	0	0	0
DTXCID4027107	3,5,5-Trimethylhexanal	5435-64-3	CC(CC=O)CC(C)(C)C	InChI=1/C9H18O/c1-8(5-6-10)7-9(2,3)4/h6,8H,5,7H2,1-4H3	InChI=1/C9H18O/c1-8(5-6-10)7-9(2,3)4/h6,8H,5,7H2,1-4H3	C9H18O	142.136	136.947	136.546	136.634	Lite	0	0	0	0	0	0	0	0	0	0
DTXCID7021815	(1R,5R)-3,3,5-trimethylcyclohexanol	933-48-2	C[C@H]1C[C@@H](O)CC(C)(C)C1	InChI=1S/C9H18O/c1-7-4-8(10)6-9(2,3)5-7/h7-8,10H,4-6H2,1-3H3/t7-,8+/m0/s1	InChI=1S/C9H18O/c1-7-4-8(10)6-9(2,3)5-7/h7-8,10H,4-6H2,1-3H3/t7-,8+/m0/s1	C9H18O	142.136	134.536	133.952	133.683	Lite	0	0	0	0	0	0	0	0	0	0
DTXCID7021815	3,3,5-Trimethylcyclohexanol	116-02-9	CC1CC(O)CC(C)(C)C1	InChI=1/C9H18O/c1-7-4-8(10)6-9(2,3)5-7/h7-8,10H,4-6H2,1-3H3	InChI=1/C9H18O/c1-7-4-8(10)6-9(2,3)5-7/h7-8,10H,4-6H2,1-3H3	C9H18O	142.136	130.96	130.427	130.401	Lite	0	0	0	0	0	0	0	0	0	0
DTXCID801639	Nonanal	124-19-6	CCCCCCCCC=O	InChI=1S/C9H18O/c1-2-3-4-5-6-7-8-9-10/h9H,2-8H2,1H3	InChI=1S/C9H18O/c1-2-3-4-5-6-7-8-9-10/h9H,2-8H2,1H3	C9H18O	142.136	139.201	137.334	138.534	Lite	0	0	0	0	0	0	0	0	0	0
DTXCID8027244	3-Cyclohexylpropan-1-ol	1124-63-6	OCCCC1CCCCC1	InChI=1S/C9H18O/c10-8-4-7-9-5-2-1-3-6-9/h9-10H,1-8H2	InChI=1S/C9H18O/c10-8-4-7-9-5-2-1-3-6-9/h9-10H,1-8H2	C9H18O	142.136	135.945	135.061	135.04	Lite	0	0	0	0	0	0	0	0	0	0
DTXCID905080	Diisobutyl ketone	108-83-8	CC(C)CC(=O)CC(C)C	InChI=1S/C9H18O/c1-7(2)5-9(10)6-8(3)4/h7-8H,5-6H2,1-4H3	InChI=1S/C9H18O/c1-7(2)5-9(10)6-8(3)4/h7-8H,5-6H2,1-4H3	C9H18O	142.136	140.402	139.638	137.385	Lite	0	0	0	0	0	0	0	0	0	0
DTXCID2021238	1,3-Cyclohexanedimethanamine	2579-20-6	NCC1CCCC(CN)C1	InChI=1/C8H18N2/c9-5-7-2-1-3-8(4-7)6-10/h7-8H,1-6,9-10H2	InChI=1/C8H18N2/c9-5-7-2-1-3-8(4-7)6-10/h7-8H,1-6,9-10H2	C8H18N2	142.147	132.776	132.217	132.011	Lite	0	0	0	0	0	0	0	0	0	0
DTXCID704913	Decane	124-18-5	CCCCCCCCCC	InChI=1S/C10H22/c1-3-5-7-9-10-8-6-4-2/h3-10H2,1-2H3	InChI=1S/C10H22/c1-3-5-7-9-10-8-6-4-2/h3-10H2,1-2H3	C10H22	142.172				NA	0	0	0	0	0	0	0	0	0	0
DTXCID1024382	Thiamine thiozole	137-00-8	CC1=C(CCO)SC=N1	InChI=1S/C6H9NOS/c1-5-6(2-3-8)9-4-7-5/h4,8H,2-3H2,1H3	InChI=1S/C6H9NOS/c1-5-6(2-3-8)9-4-7-5/h4,8H,2-3H2,1H3	C6H9NOS	143.041	126.072	125.36	125.358	Lite	0	0	0	0	0	0	0	0	0	0
DTXCID8018831	2-Methoxyethyl cyanoacetate	10258-54-5	COCCOC(=O)CC#N	InChI=1S/C6H9NO3/c1-9-4-5-10-6(8)2-3-7/h2,4-5H2,1H3	InChI=1S/C6H9NO3/c1-9-4-5-10-6(8)2-3-7/h2,4-5H2,1H3	C6H9NO3	143.058	130.507	130.101	129.848	Lite	0	0	0	0	0	0	0	0	0	0
DTXCID1020271	Quinaldine	91-63-4	CC1=NC2=C(C=CC=C2)C=C1	InChI=1S/C10H9N/c1-8-6-7-9-4-2-3-5-10(9)11-8/h2-7H,1H3	InChI=1S/C10H9N/c1-8-6-7-9-4-2-3-5-10(9)11-8/h2-7H,1H3	C10H9N	143.073	131.216	131.22	130.451	Lite	0	0	0	0	0	0	0	0	0	0
DTXCID30920	1-Naphthylamine	134-32-7	NC1=CC=CC2=C1C=CC=C2	InChI=1S/C10H9N/c11-10-7-3-5-8-4-1-2-6-9(8)10/h1-7H,11H2	InChI=1S/C10H9N/c11-10-7-3-5-8-4-1-2-6-9(8)10/h1-7H,11H2	C10H9N	143.073	129.644	128.883	128.762	Lite	0	0	0	0	0	0	0	0	0	0
DTXCID5027067	Lepidine	491-35-0	CC1=CC=NC2=C1C=CC=C2	InChI=1S/C10H9N/c1-8-6-7-11-10-5-3-2-4-9(8)10/h2-7H,1H3	InChI=1S/C10H9N/c1-8-6-7-11-10-5-3-2-4-9(8)10/h2-7H,1H3	C10H9N	143.073	130.195	129.767	129.099	Lite	0	0	0	0	0	0	0	0	0	0
DTXCID50887	6-Methylquinoline	91-62-3	CC1=CC2=CC=CN=C2C=C1	InChI=1S/C10H9N/c1-8-4-5-10-9(7-8)3-2-6-11-10/h2-7H,1H3	InChI=1S/C10H9N/c1-8-4-5-10-9(7-8)3-2-6-11-10/h2-7H,1H3	C10H9N	143.073	131.373	130.795	130.779	Lite	0	0	0	0	0	0	0	0	0	0
DTXCID60921	2-Naphthylamine	91-59-8	NC1=CC2=C(C=CC=C2)C=C1	InChI=1S/C10H9N/c11-10-6-5-8-3-1-2-4-9(8)7-10/h1-7H,11H2	InChI=1S/C10H9N/c11-10-6-5-8-3-1-2-4-9(8)7-10/h1-7H,11H2	C10H9N	143.073	130.936	130.115	129.895	Lite	0	0	0	0	0	0	0	1	0	0
DTXCID309289	5-Ethyl-1-aza-3,7-dioxabicyclo[3.3.0]octane	7747-35-5	CCC12COCN1COC2	InChI=1S/C7H13NO2/c1-2-7-3-9-5-8(7)6-10-4-7/h2-6H2,1H3	InChI=1S/C7H13NO2/c1-2-7-3-9-5-8(7)6-10-4-7/h2-6H2,1H3	C7H13NO2	143.095	127.659	127.07	127.11	Lite	0	0	0	0	0	0	0	0	0	0
DTXCID3024499	4-Butylmorpholine	1005-67-0	CCCCN1CCOCC1	InChI=1S/C8H17NO/c1-2-3-4-9-5-7-10-8-6-9/h2-8H2,1H3_x000D_	InChI=1S/C8H17NO/c1-2-3-4-9-5-7-10-8-6-9/h2-8H2,1H3	C8H17NO	143.131	136.09	142.515	135.002	Standard	0	0	0	0	0	0	0	0	0	0
DTXCID7024619	N-Methyloctan-1-amine	2439-54-5	CCCCCCCCNC	InChI=1S/C9H21N/c1-3-4-5-6-7-8-9-10-2/h10H,3-9H2,1-2H3	InChI=1S/C9H21N/c1-3-4-5-6-7-8-9-10-2/h10H,3-9H2,1-2H3	C9H21N	143.167	143.187	150.922	142.464	Standard	0	0	0	0	0	0	0	0	0	0
DTXCID80911726	1,2,3-Trichloropropene	96-19-5	ClCC(Cl)=CCl	InChI=1S/C3H3Cl3/c4-1-3(6)2-5/h1H,2H2_x000D_	InChI=1S/C3H3Cl3/c4-1-3(6)2-5/h1H,2H2	C3H3Cl3	143.93			96.6059	Lite	0	0	0	0	0	0	0	0	0	0
DTXCID804085	Ethephon	16672-87-0	OP(O)(=O)CCCl	InChI=1S/C2H6ClO3P/c3-1-2-7(4,5)6/h1-2H2,(H2,4,5,6)	InChI=1S/C2H6ClO3P/c3-1-2-7(4,5)6/h1-2H2,(H2,4,5,6)	C2H6ClO3P	143.974			115.607	Lite	0	0	0	0	0	0	0	0	0	0
DTXCID5031216	4-Chlororesorcinol	95-88-5	OC1=CC=C(Cl)C(O)=C1	InChI=1S/C6H5ClO2/c7-5-2-1-4(8)3-6(5)9/h1-3,8-9H_x000D_	InChI=1S/C6H5ClO2/c7-5-2-1-4(8)3-6(5)9/h1-3,8-9H	C6H5ClO2	143.998	120.599	118.561	118.283	Lite	0	0	0	0	0	0	0	0	0	0
DTXCID20209679	Dimethyl maleate	624-48-6	COC(=O)\C=C/C(=O)OC	InChI=1S/C6H8O4/c1-9-5(7)3-4-6(8)10-2/h3-4H,1-2H3/b4-3-	InChI=1S/C6H8O4/c1-9-5(7)3-4-6(8)10-2/h3-4H,1-2H3/b4-3-	C6H8O4	144.042	133.688	133.19	132.949	Lite	0	0	0	0	0	0	0	0	0	0
DTXCID5021253	3,6-Dimethyl-2,5-dioxo-1,4-dioxane	95-96-5	CC1OC(=O)C(C)OC1=O	InChI=1/C6H8O4/c1-3-5(7)10-4(2)6(8)9-3/h3-4H,1-2H3	InChI=1/C6H8O4/c1-3-5(7)10-4(2)6(8)9-3/h3-4H,1-2H3	C6H8O4	144.042	128.531	128.046	127.87	Lite	0	0	0	0	0	0	0	0	0	0
DTXCID80209897	4-Ethoxy-4-oxobut-2-enoic acid	3249-53-4	CCOC(=O)C=CC(O)=O	InChI=1S/C6H8O4/c1-2-10-6(9)4-3-5(7)8/h3-4H,2H2,1H3,(H,7,8)	InChI=1S/C6H8O4/c1-2-10-6(9)4-3-5(7)8/h3-4H,2H2,1H3,(H,7,8)	C6H8O4	144.042	135.333	134.645	134.601	Lite	0	0	0	0	0	0	1	0	0	0
DTXCID807834	2-Carboxyethyl acrylate	24615-84-7	OC(=O)CCOC(=O)C=C	InChI=1S/C6H8O4/c1-2-6(9)10-4-3-5(7)8/h2H,1,3-4H2,(H,7,8)	InChI=1S/C6H8O4/c1-2-6(9)10-4-3-5(7)8/h2H,1,3-4H2,(H,7,8)	C6H8O4	144.042	129.937	130.37	130.831	Lite	0	0	0	0	0	0	0	0	0	0
DTXCID401793	1-Naphthol	90-15-3	OC1=CC=CC2=CC=CC=C12	InChI=1S/C10H8O/c11-10-7-3-5-8-4-1-2-6-9(8)10/h1-7,11H	InChI=1S/C10H8O/c11-10-7-3-5-8-4-1-2-6-9(8)10/h1-7,11H	C10H8O	144.058	139.001	145.025	127.708	Standard	1	0	0	0	1	0	1	0	0	1
DTXCID907061	2-Naphthalenol	135-19-3	OC1=CC2=C(C=CC=C2)C=C1	InChI=1S/C10H8O/c11-10-6-5-8-3-1-2-4-9(8)7-10/h1-7,11H	InChI=1S/C10H8O/c11-10-6-5-8-3-1-2-4-9(8)7-10/h1-7,11H	C10H8O	144.058	141.891	143.533	128.058	Standard	0	1	0	0	0	0	0	0	0	1
DTXCID2027090	5-Methylquinoxaline	13708-12-8	CC1=CC=CC2=NC=CN=C12	InChI=1S/C9H8N2/c1-7-3-2-4-8-9(7)11-6-5-10-8/h2-6H,1H3	InChI=1S/C9H8N2/c1-7-3-2-4-8-9(7)11-6-5-10-8/h2-6H,1H3	C9H8N2	144.069	129.325	129.224	128.62	Lite	0	0	0	0	0	0	0	0	0	0
DTXCID1024623	4-Hydroxybutyl prop-2-enoate	2478-10-06	OCCCCOC(=O)C=C	InChI=1S/C7H12O3/c1-2-7(9)10-6-4-3-5-8/h2,8H,1,3-6H2	InChI=1S/C7H12O3/c1-2-7(9)10-6-4-3-5-8/h2,8H,1,3-6H2	C7H12O3	144.079	135.196	134.297	134.449	Lite	0	0	0	0	0	0	0	0	0	0
DTXCID6027058	Ethyl levulinate	539-88-8	CCOC(=O)CCC(C)=O	InChI=1S/C7H12O3/c1-3-10-7(9)5-4-6(2)8/h3-5H2,1-2H3	InChI=1S/C7H12O3/c1-3-10-7(9)5-4-6(2)8/h3-5H2,1-2H3	C7H12O3	144.079	134.834	134.092	134.106	Lite	0	0	0	0	0	0	0	0	0	0
DTXCID106712	1,4-Cyclohexanedimethanol	105-08-8	OCC1CCC(CO)CC1	InChI=1S/C8H16O2/c9-5-7-1-2-8(6-10)4-3-7/h7-10H,1-6H2	InChI=1S/C8H16O2/c9-5-7-1-2-8(6-10)4-3-7/h7-10H,1-6H2	C8H16O2	144.115	132.086	131.4	132.36	Lite	0	0	0	0	0	0	0	0	0	0
DTXCID301980	Ethyl hexanoate	123-66-0	CCCCCC(=O)OCC	InChI=1S/C8H16O2/c1-3-5-6-7-8(9)10-4-2/h3-7H2,1-2H3	InChI=1S/C8H16O2/c1-3-5-6-7-8(9)10-4-2/h3-7H2,1-2H3	C8H16O2	144.115	137.556	137.217	136.754	Lite	0	0	0	0	0	0	0	0	0	0
DTXCID501645	Octanoic acid	124-07-2	CCCCCCCC(O)=O	InChI=1S/C8H16O2/c1-2-3-4-5-6-7-8(9)10/h2-7H2,1H3,(H,9,10)	InChI=1S/C8H16O2/c1-2-3-4-5-6-7-8(9)10/h2-7H2,1H3,(H,9,10)	C8H16O2	144.115			137.705	Lite	0	0	0	0	0	0	0	0	0	0
DTXCID5027198	Ethyl 2-methylpentanoate	39255-32-8	CCCC(C)C(=O)OCC	InChI=1/C8H16O2/c1-4-6-7(3)8(9)10-5-2/h7H,4-6H2,1-3H3	InChI=1/C8H16O2/c1-4-6-7(3)8(9)10-5-2/h7H,4-6H2,1-3H3	C8H16O2	144.115	138.435	138.564	138.294	Lite	0	0	0	0	0	0	0	0	0	0
DTXCID602006	Hexyl acetate	142-92-7	CCCCCCOC(C)=O	InChI=1S/C8H16O2/c1-3-4-5-6-7-10-8(2)9/h3-7H2,1-2H3	InChI=1S/C8H16O2/c1-3-4-5-6-7-10-8(2)9/h3-7H2,1-2H3	C8H16O2	144.115	136.396	137.886	137.481	Lite	0	0	0	0	0	0	0	0	0	0
DTXCID7024908	2,2,4,4-Tetramethylcyclobutane-1,3-diol	3010-96-6	CC1(C)C(O)C(C)(C)C1O	InChI=1S/C8H16O2/c1-7(2)5(9)8(3,4)6(7)10/h5-6,9-10H,1-4H3	InChI=1S/C8H16O2/c1-7(2)5(9)8(3,4)6(7)10/h5-6,9-10H,1-4H3	C8H16O2	144.115	132.506	131.321	130.959	Lite	0	0	0	0	0	0	0	0	0	0
DTXCID803733, DTXCID803733	Sodium valproate, Valproic acid	1069-66-5, 99-66-1	[Na+].CCCC(CCC)C([O-])=O	InChI=1S/C8H16O2.Na/c1-3-5-7(6-4-2)8(9)10;/h7H,3-6H2,1-2H3,(H,9,10);/q;+1/p-1	InChI=1S/C8H16O2/c1-3-5-7(6-4-2)8(9)10/h7H,3-6H2,1-2H3,(H,9,10)	C8H16O2	144.115			137.653	Lite	0	0	0	0	0	0	0	0	0	0
DTXCID805293, DTXCID805293, DTXCID805293	Barium bis(2-ethylhexanoate), Potassium 2-ethylhexanoate, 2-Ethylhexanoic acid	2457-01-4, 3164-85-0, 149-57-5	[Ba++].CCCCC(CC)C([O-])=O.CCCCC(CC)C([O-])=O	InChI=1/2C8H16O2.Ba/c2*1-3-5-6-7(4-2)8(9)10;/h2*7H,3-6H2,1-2H3,(H,9,10);/q;;+2/p-2	InChI=1/C8H16O2/c1-3-5-6-7(4-2)8(9)10/h7H,3-6H2,1-2H3,(H,9,10)	C8H16O2	144.115			136.163	Lite	0	0	0	0	0	0	0	0	0	0
DTXCID2021521	4-Morpholinepropanamine	123-00-2	NCCCN1CCOCC1	InChI=1S/C7H16N2O/c8-2-1-3-9-4-6-10-7-5-9/h1-8H2	InChI=1S/C7H16N2O/c8-2-1-3-9-4-6-10-7-5-9/h1-8H2	C7H16N2O	144.126	131.862	138.822	139.619	Standard	0	0	0	0	0	0	0	0	0	0
DTXCID4024486	1,3-Dipropan-2-ylurea	4128-37-4	CC(C)NC(=O)NC(C)C	InChI=1S/C7H16N2O/c1-5(2)8-7(10)9-6(3)4/h5-6H,1-4H3,(H2,8,9,10)	InChI=1S/C7H16N2O/c1-5(2)8-7(10)9-6(3)4/h5-6H,1-4H3,(H2,8,9,10)	C7H16N2O	144.126	137.665	136.462	136.516	Standard	1	0	0	0	1	0	1	0	0	0
DTXCID309661	3,5,5-Trimethyl-1-hexanol	3452-97-9	CC(CCO)CC(C)(C)C	InChI=1/C9H20O/c1-8(5-6-10)7-9(2,3)4/h8,10H,5-7H2,1-4H3	InChI=1/C9H20O/c1-8(5-6-10)7-9(2,3)4/h8,10H,5-7H2,1-4H3	C9H20O	144.151	137.683	137.382	137.44	Lite	0	0	0	0	0	0	0	0	0	0
DTXCID402008	1-Nonanol	143-08-8	CCCCCCCCCO	InChI=1S/C9H20O/c1-2-3-4-5-6-7-8-9-10/h10H,2-9H2,1H3	InChI=1S/C9H20O/c1-2-3-4-5-6-7-8-9-10/h10H,2-9H2,1H3	C9H20O	144.151	141.915	141.438	141.051	Lite	0	0	0	0	0	0	0	0	0	0
DTXCID4021424	2,6-Dimethyl-2-heptanol	13254-34-7	CC(C)CCCC(C)(C)O	InChI=1S/C9H20O/c1-8(2)6-5-7-9(3,4)10/h8,10H,5-7H2,1-4H3	InChI=1S/C9H20O/c1-8(2)6-5-7-9(3,4)10/h8,10H,5-7H2,1-4H3	C9H20O	144.151	138.643	138.041	137.9	Lite	0	0	0	0	0	0	0	0	0	0
DTXCID8066	2-Amino-5-nitrothiazole	121-66-4	NC1=NC=C(S1)[N+]([O-])=O	InChI=1S/C3H3N3O2S/c4-3-5-1-2(9-3)6(7)8/h1H,(H2,4,5)	InChI=1S/C3H3N3O2S/c4-3-5-1-2(9-3)6(7)8/h1H,(H2,4,5)	C3H3N3O2S	144.995	120.958	122.107	121.336	Lite	0	0	0	0	0	0	0	0	0	0
DTXCID9017806	2-Chloro-4,6-diamino-1,3,5-triazine	3397-62-4	NC1=NC(Cl)=NC(N)=N1	InChI=1S/C3H4ClN5/c4-1-7-2(5)9-3(6)8-1/h(H4,5,6,7,8,9)	InChI=1S/C3H4ClN5/c4-1-7-2(5)9-3(6)8-1/h(H4,5,6,7,8,9)	C3H4ClN5	145.016	116.097	116.929	116.366	Lite	0	1	0	0	0	0	0	0	0	0
DTXCID30730, DTXCID30730	8-Hydroxyquinoline sulfate, 8-Hydroxyquinoline	134-31-6, 148-24-3	OS(O)(=O)=O.OC1=C2N=CC=CC2=CC=C1.OC1=C2N=CC=CC2=CC=C1	InChI=1S/2C9H7NO.H2O4S/c2*11-8-5-1-3-7-4-2-6-10-9(7)8;1-5(2,3)4/h2*1-6,11H;(H2,1,2,3,4)	InChI=1S/C9H7NO/c11-8-5-1-3-7-4-2-6-10-9(7)8/h1-6,11H	C9H7NO	145.053	131.19	144.022	129.452	Standard	0	0	0	1	0	0	0	0	1	0
DTXCID8024658	1H-Isoindole-1,3(2H)-diimine	3468-11-09	N=C1NC(=N)C2=C1C=CC=C2	InChI=1S/C8H7N3/c9-7-5-3-1-2-4-6(5)8(10)11-7/h1-4H,(H3,9,10,11)	InChI=1S/C8H7N3/c9-7-5-3-1-2-4-6(5)8(10)11-7/h1-4H,(H3,9,10,11)	C8H7N3	145.064	130.364	129.766	129.726	Lite	0	0	0	0	0	0	0	0	0	0
DTXCID4027440	4-Isopropylbenzonitrile	13816-33-6	CC(C)C1=CC=C(C=C1)C#N	InChI=1S/C10H11N/c1-8(2)10-5-3-9(7-11)4-6-10/h3-6,8H,1-2H3	InChI=1S/C10H11N/c1-8(2)10-5-3-9(7-11)4-6-10/h3-6,8H,1-2H3	C10H11N	145.089			137.4	Lite	0	0	0	0	0	0	0	0	0	0
DTXCID101822	2-(Diisopropylamino)ethanol	96-80-0	CC(C)N(CCO)C(C)C	InChI=1S/C8H19NO/c1-7(2)9(5-6-10)8(3)4/h7-8,10H,5-6H2,1-4H3	InChI=1S/C8H19NO/c1-7(2)9(5-6-10)8(3)4/h7-8,10H,5-6H2,1-4H3	C8H19NO	145.147	134.974	134.724	134.698	Lite	0	0	0	0	0	0	0	0	0	0
DTXCID401390	1,2,3-Trichloropropane	96-18-4	ClCC(Cl)CCl	InChI=1S/C3H5Cl3/c4-1-3(6)2-5/h3H,1-2H2	InChI=1S/C3H5Cl3/c4-1-3(6)2-5/h3H,1-2H2	C3H5Cl3	145.946			98.5252	Lite	0	0	0	0	0	0	0	0	0	0
DTXCID00430	1,2-Dichlorobenzene	95-50-1	ClC1=C(Cl)C=CC=C1	InChI=1S/C6H4Cl2/c7-5-3-1-2-4-6(5)8/h1-4H	InChI=1S/C6H4Cl2/c7-5-3-1-2-4-6(5)8/h1-4H	C6H4Cl2	145.969			107.123	Lite	0	0	0	0	0	0	0	0	0	0
DTXCID102056	1,3-Dichlorobenzene	541-73-1	ClC1=CC(Cl)=CC=C1	InChI=1S/C6H4Cl2/c7-5-2-1-3-6(8)4-5/h1-4H	InChI=1S/C6H4Cl2/c7-5-2-1-3-6(8)4-5/h1-4H	C6H4Cl2	145.969			107.063	Lite	0	0	0	0	0	0	0	0	0	0
DTXCID30431	1,4-Dichlorobenzene	106-46-7	ClC1=CC=C(Cl)C=C1	InChI=1S/C6H4Cl2/c7-5-1-2-6(8)4-3-5/h1-4H	InChI=1S/C6H4Cl2/c7-5-1-2-6(8)4-3-5/h1-4H	C6H4Cl2	145.969			107.146	Lite	0	0	0	0	0	0	0	0	0	0
DTXCID7015206	Diallyl disulfide	2179-57-9	C=CCSSCC=C	InChI=1S/C6H10S2/c1-3-5-7-8-6-4-2/h3-4H,1-2,5-6H2	InChI=1S/C6H10S2/c1-3-5-7-8-6-4-2/h3-4H,1-2,5-6H2	C6H10S2	146.022				NA	0	0	0	0	0	0	0	0	0	0
DTXCID2027121	2-Benzofurancarboxaldehyde	4265-16-1	O=CC1=CC2=C(O1)C=CC=C2	InChI=1S/C9H6O2/c10-6-8-5-7-3-1-2-4-9(7)11-8/h1-6H	InChI=1S/C9H6O2/c10-6-8-5-7-3-1-2-4-9(7)11-8/h1-6H	C9H6O2	146.037	130.079	129.585	129.583	Lite	0	0	0	0	0	0	0	0	0	0
DTXCID50348	Coumarin	91-64-5	O=C1OC2=C(C=CC=C2)C=C1	InChI=1S/C9H6O2/c10-9-6-5-7-3-1-2-4-8(7)11-9/h1-6H	InChI=1S/C9H6O2/c10-9-6-5-7-3-1-2-4-8(7)11-9/h1-6H	C9H6O2	146.037	128.289	127.857	127.218	Lite	0	0	0	0	0	0	0	0	0	0
DTXCID0024472	Diethyl oxalate	95-92-1	CCOC(=O)C(=O)OCC	InChI=1S/C6H10O4/c1-3-9-5(7)6(8)10-4-2/h3-4H2,1-2H3	InChI=1S/C6H10O4/c1-3-9-5(7)6(8)10-4-2/h3-4H2,1-2H3	C6H10O4	146.058	132.761	132.284	131.755	Lite	0	0	0	0	0	0	0	0	0	0
DTXCID005152	Dimethyl succinate	106-65-0	COC(=O)CCC(=O)OC	InChI=1S/C6H10O4/c1-9-5(7)3-4-6(8)10-2/h3-4H2,1-2H3	InChI=1S/C6H10O4/c1-9-5(7)3-4-6(8)10-2/h3-4H2,1-2H3	C6H10O4	146.058	133.338	132.691	132.453	Lite	0	0	0	0	0	0	0	0	0	0
DTXCID2024589	5-Methoxy-5-oxopentanoic acid	1501-27-5	COC(=O)CCCC(O)=O	InChI=1S/C6H10O4/c1-10-6(9)4-2-3-5(7)8/h2-4H2,1H3,(H,7,8)	InChI=1S/C6H10O4/c1-10-6(9)4-2-3-5(7)8/h2-4H2,1H3,(H,7,8)	C6H10O4	146.058	134.127	132.617	132.388	Lite	0	0	0	0	0	0	0	0	0	0
DTXCID301605	Hexanedioic acid	124-04-9	OC(=O)CCCCC(O)=O	InChI=1S/C6H10O4/c7-5(8)3-1-2-4-6(9)10/h1-4H2,(H,7,8)(H,9,10)	InChI=1S/C6H10O4/c7-5(8)3-1-2-4-6(9)10/h1-4H2,(H,7,8)(H,9,10)	C6H10O4	146.058			133.475	Lite	0	0	0	0	0	0	0	1	0	0
DTXCID606880	1,2-Ethanediol diacetate	111-55-7	CC(=O)OCCOC(C)=O	InChI=1S/C6H10O4/c1-5(7)9-3-4-10-6(2)8/h3-4H2,1-2H3	InChI=1S/C6H10O4/c1-5(7)9-3-4-10-6(2)8/h3-4H2,1-2H3	C6H10O4	146.058	130.162	129.521	129.425	Lite	0	0	0	0	0	0	0	0	0	0
DTXCID4024858	5-Phenyl-1H-tetrazole	18039-42-4	N1N=NN=C1C1=CC=CC=C1	InChI=1S/C7H6N4/c1-2-4-6(5-3-1)7-8-10-11-9-7/h1-5H,(H,8,9,10,11)	InChI=1S/C7H6N4/c1-2-4-6(5-3-1)7-8-10-11-9-7/h1-5H,(H,8,9,10,11)	C7H6N4	146.059	129.857	129.103	128.638	Lite	0	0	1	0	0	0	0	0	1	0
DTXCID9024934	4,5-Dihydroxy-1,3-dimethylimidazolidin-2-one	3923-79-3	CN1C(O)C(O)N(C)C1=O	InChI=1/C5H10N2O3/c1-6-3(8)4(9)7(2)5(6)10/h3-4,8-9H,1-2H3	InChI=1/C5H10N2O3/c1-6-3(8)4(9)7(2)5(6)10/h3-4,8-9H,1-2H3	C5H10N2O3	146.069	131.017	129.732	129.43	Lite	0	0	0	0	0	0	0	0	0	0
DTXCID9011626, DTXCID9011626	Methyl trans-styryl ketone, Methyl styryl ketone	1896-62-4, 122-57-6	CC(=O)\C=C\C1=CC=CC=C1	InChI=1S/C10H10O/c1-9(11)7-8-10-5-3-2-4-6-10/h2-8H,1H3/b8-7+	InChI=1S/C10H10O/c1-9(11)7-8-10-5-3-2-4-6-10/h2-8H,1H3	C10H10O	146.073	139.11	138.87	138.3	Lite	0	0	0	0	1	1	0	0	0	1
DTXCID5022196	Butyl (2S)-2-hydroxypropanoate	34451-19-9	CCCCOC(=O)[C@H](C)O	InChI=1S/C7H14O3/c1-3-4-5-10-7(9)6(2)8/h6,8H,3-5H2,1-2H3/t6-/m0/s1	InChI=1S/C7H14O3/c1-3-4-5-10-7(9)6(2)8/h6,8H,3-5H2,1-2H3/t6-/m0/s1	C7H14O3	146.094	134.898	133.931	134.331	Lite	0	0	0	0	0	0	0	0	0	0
DTXCID5022196	Butyl lactate	138-22-7	CCCCOC(=O)C(C)O	InChI=1/C7H14O3/c1-3-4-5-10-7(9)6(2)8/h6,8H,3-5H2,1-2H3	InChI=1/C7H14O3/c1-3-4-5-10-7(9)6(2)8/h6,8H,3-5H2,1-2H3	C7H14O3	146.094	134.286	134.297	134.612	Lite	0	0	0	0	0	0	0	0	0	0
DTXCID8024949	(5-Ethyl-1,3-dioxan-5-yl)methanol	5187-23-5	CCC1(CO)COCOC1	InChI=1S/C7H14O3/c1-2-7(3-8)4-9-6-10-5-7/h8H,2-6H2,1H3	InChI=1S/C7H14O3/c1-2-7(3-8)4-9-6-10-5-7/h8H,2-6H2,1H3	C7H14O3	146.094	129.921	128.965	128.976	Lite	0	0	0	0	0	0	0	0	0	0
DTXCID0021674	Triethyl borate	150-46-9	CCOB(OCC)OCC	InChI=1S/C6H15BO3/c1-4-8-7(9-5-2)10-6-3/h4-6H2,1-3H3	InChI=1S/C6H15BO3/c1-4-8-7(9-5-2)10-6-3/h4-6H2,1-3H3	C6H15BO3	146.111	136.644	136.278	135.913	Lite	0	0	0	0	0	0	0	0	0	0
DTXCID902058	Dibutyl sulfide	544-40-1	CCCCSCCCC	InChI=1S/C8H18S/c1-3-5-7-9-8-6-4-2/h3-8H2,1-2H3	InChI=1S/C8H18S/c1-3-5-7-9-8-6-4-2/h3-8H2,1-2H3	C8H18S	146.113				NA	0	0	0	0	0	0	0	0	0	0
DTXCID405292, DTXCID9024695	2-Ethyl-1,3-hexanediol, Titanium(4+) tetrakis(2-ethyl-3-hydroxyhexan-1-olate)	94-96-2, 5575-43-9	CCCC(O)C(CC)CO	InChI=1/C8H18O2/c1-3-5-8(10)7(4-2)6-9/h7-10H,3-6H2,1-2H3	InChI=1/C8H18O2/c1-3-5-8(10)7(4-2)6-9/h7-10H,3-6H2,1-2H3	C8H18O2	146.131	137.579	136.183	136.343	Lite	0	0	0	0	0	0	0	0	0	0
DTXCID606908	2-(Hexyloxy)ethanol	112-25-4	CCCCCCOCCO	InChI=1S/C8H18O2/c1-2-3-4-5-7-10-8-6-9/h9H,2-8H2,1H3	InChI=1S/C8H18O2/c1-2-3-4-5-7-10-8-6-9/h9H,2-8H2,1H3	C8H18O2	146.131	137.746	138.465	138.591	Lite	0	0	0	0	0	0	0	0	0	0
DTXCID7016646	1,2-Octanediol	1117-86-8	CCCCCCC(O)CO	InChI=1/C8H18O2/c1-2-3-4-5-6-8(10)7-9/h8-10H,2-7H2,1H3	InChI=1/C8H18O2/c1-2-3-4-5-6-8(10)7-9/h8-10H,2-7H2,1H3	C8H18O2	146.131	140.208	139.237	139.071	Lite	0	0	0	0	0	0	0	0	0	0
DTXCID704955	Di-tert-butyl peroxide	110-05-4	CC(C)(C)OOC(C)(C)C	InChI=1S/C8H18O2/c1-7(2,3)9-10-8(4,5)6/h1-6H3	InChI=1S/C8H18O2/c1-7(2,3)9-10-8(4,5)6/h1-6H3	C8H18O2	146.131	138.07	137.472		Lite	0	0	0	0	0	0	0	0	0	0
DTXCID7024875	2-{[2-(Dimethylamino)ethyl](methyl)amino}ethanol	2212-32-0	CN(C)CCN(C)CCO	InChI=1S/C7H18N2O/c1-8(2)4-5-9(3)6-7-10/h10H,4-7H2,1-3H3	InChI=1S/C7H18N2O/c1-8(2)4-5-9(3)6-7-10/h10H,4-7H2,1-3H3	C7H18N2O	146.142	135.025	134.981	135.152	Lite	0	0	0	0	0	0	0	0	0	0
DTXCID0030457	2,6-Dichloropyridine	2402-78-0	ClC1=CC=CC(Cl)=N1	InChI=1S/C5H3Cl2N/c6-4-2-1-3-5(7)8-4/h1-3H	InChI=1S/C5H3Cl2N/c6-4-2-1-3-5(7)8-4/h1-3H	C5H3Cl2N	146.964	107.42	107.006	106.276	Lite	0	0	0	0	0	0	0	0	0	0
DTXCID1027132	3-(Methylthio)propyl isothiocyanate	505-79-3	CSCCCN=C=S	InChI=1S/C5H9NS2/c1-8-4-2-3-6-5-7/h2-4H2,1H3	InChI=1S/C5H9NS2/c1-8-4-2-3-6-5-7/h2-4H2,1H3	C5H9NS2	147.018	126.781	127.468	126.804	Lite	0	0	0	0	0	0	0	0	0	0
DTXCID506514	Phthalimide	85-41-6	O=C1NC(=O)C2=C1C=CC=C2	InChI=1S/C8H5NO2/c10-7-5-3-1-2-4-6(5)8(11)9-7/h1-4H,(H,9,10,11)	InChI=1S/C8H5NO2/c10-7-5-3-1-2-4-6(5)8(11)9-7/h1-4H,(H,9,10,11)	C8H5NO2	147.032	129.59	129.435	129.092	Lite	0	0	0	0	0	0	0	0	0	0
DTXCID7021659	4-Cyanobenzoic acid	619-65-8	OC(=O)C1=CC=C(C=C1)C#N	InChI=1S/C8H5NO2/c9-5-6-1-3-7(4-2-6)8(10)11/h1-4H,(H,10,11)	InChI=1S/C8H5NO2/c9-5-6-1-3-7(4-2-6)8(10)11/h1-4H,(H,10,11)	C8H5NO2	147.032			133.494	Lite	0	0	0	1	0	0	0	0	0	0
DTXCID406544	1,2,3-Benzotriazin-4(1H)-one	90-16-4	O=C1N=NNC2=C1C=CC=C2	InChI=1S/C7H5N3O/c11-7-5-3-1-2-4-6(5)8-10-9-7/h1-4H,(H,8,9,11)	InChI=1S/C7H5N3O/c11-7-5-3-1-2-4-6(5)8-10-9-7/h1-4H,(H,8,9,11)	C7H5N3O	147.043	127.623	127.099	126.713	Lite	0	0	0	0	0	0	0	0	0	0
DTXCID8026987, DTXCID8026987	Sodium L-glutamate hydrate, L-Glutamic acid hydrochloride	6106-04-3, 138-15-8	O.[Na+].N[C@@H](CCC(O)=O)C([O-])=O	InChI=1S/C5H9NO4.Na.H2O/c6-3(5(9)10)1-2-4(7)8;;/h3H,1-2,6H2,(H,7,8)(H,9,10);;1H2/q;+1;/p-1/t3-;;/m0../s1_x000D_	InChI=1S/C5H9NO4/c6-3(5(9)10)1-2-4(7)8/h3H,1-2,6H2,(H,7,8)(H,9,10)/t3-/m0/s1	C5H9NO4	147.053	132.023	131.731	131.593	Lite	0	0	0	0	0	0	0	0	0	0
DTXCID1030076	4-Methoxyphenylacetonitrile	104-47-2	COC1=CC=C(CC#N)C=C1	InChI=1S/C9H9NO/c1-11-9-4-2-8(3-5-9)6-7-10/h2-5H,6H2,1H3_x000D_	InChI=1S/C9H9NO/c1-11-9-4-2-8(3-5-9)6-7-10/h2-5H,6H2,1H3	C9H9NO	147.068	144.787	137.483	137.391	Standard	0	0	0	0	0	0	0	0	0	0
DTXCID3027663	1-Furfurylpyrrole	1438-94-4	C(N1C=CC=C1)C1=CC=CO1	InChI=1S/C9H9NO/c1-2-6-10(5-1)8-9-4-3-7-11-9/h1-7H,8H2	InChI=1S/C9H9NO/c1-2-6-10(5-1)8-9-4-3-7-11-9/h1-7H,8H2	C9H9NO	147.068	132.635	143.554	132.207	Standard	0	0	0	0	0	0	0	0	0	0
DTXCID5011458	Indole-3-carbinol	700-06-1	OCC1=CNC2=C1C=CC=C2	InChI=1S/C9H9NO/c11-6-7-5-10-9-4-2-1-3-8(7)9/h1-5,10-11H,6H2	InChI=1S/C9H9NO/c11-6-7-5-10-9-4-2-1-3-8(7)9/h1-5,10-11H,6H2	C9H9NO	147.068	135.21	131.476	135.474	Standard	0	0	0	0	0	0	0	0	0	0
DTXCID4027444	6-Methyl-1,2,3,4-tetrahydroquinoline	91-61-2	CC1=CC2=C(NCCC2)C=C1	InChI=1S/C10H13N/c1-8-4-5-10-9(7-8)3-2-6-11-10/h4-5,7,11H,2-3,6H2,1H3	InChI=1S/C10H13N/c1-8-4-5-10-9(7-8)3-2-6-11-10/h4-5,7,11H,2-3,6H2,1H3	C10H13N	147.105	134.155	133.967	133.686	Lite	0	0	0	0	0	0	0	0	0	0
DTXCID002489	E-Cinnamic acid	140-10-3	OC(=O)\C=C\C1=CC=CC=C1	InChI=1S/C9H8O2/c10-9(11)7-6-8-4-2-1-3-5-8/h1-7H,(H,10,11)/b7-6+	InChI=1S/C9H8O2/c10-9(11)7-6-8-4-2-1-3-5-8/h1-7H,(H,10,11)	C9H8O2	148.052			136.665	Lite	0	0	1	0	0	0	0	0	0	0
DTXCID00474	3,4-Dihydrocoumarin	119-84-6	O=C1CCC2=C(O1)C=CC=C2	InChI=1S/C9H8O2/c10-9-6-5-7-3-1-2-4-8(7)11-9/h1-4H,5-6H2	InChI=1S/C9H8O2/c10-9-6-5-7-3-1-2-4-8(7)11-9/h1-4H,5-6H2	C9H8O2	148.052	131.79	149.398	127.974	Standard	0	0	0	0	0	0	0	0	0	0
DTXCID6024967	1,3-Dioxane-5,5-diyldimethanol	6228-25-7	OCC1(CO)COCOC1	InChI=1S/C6H12O4/c7-1-6(2-8)3-9-5-10-4-6/h7-8H,1-5H2	InChI=1S/C6H12O4/c7-1-6(2-8)3-9-5-10-4-6/h7-8H,1-5H2	C6H12O4	148.074	129.09	128.252	128.252	Lite	0	0	0	0	0	0	0	0	0	0
DTXCID1027059	Butyrophenone	495-40-9	CCCC(=O)C1=CC=CC=C1	InChI=1S/C10H12O/c1-2-6-10(11)9-7-4-3-5-8-9/h3-5,7-8H,2,6H2,1H3	InChI=1S/C10H12O/c1-2-6-10(11)9-7-4-3-5-8-9/h3-5,7-8H,2,6H2,1H3	C10H12O	148.089	137.68	137.11	136.96	Lite	0	0	0	0	0	0	0	0	0	0
DTXCID2027098	3-Phenylbutyraldehyde	16251-77-7	CC(CC=O)C1=CC=CC=C1	InChI=1/C10H12O/c1-9(7-8-11)10-5-3-2-4-6-10/h2-6,8-9H,7H2,1H3	InChI=1/C10H12O/c1-9(7-8-11)10-5-3-2-4-6-10/h2-6,8-9H,7H2,1H3	C10H12O	148.089	136.4	134.35	134.45	Lite	0	0	0	0	0	0	0	0	0	0
DTXCID2087	(E)-Anethole	4180-23-8	COC1=CC=C(\C=C\C)C=C1	InChI=1S/C10H12O/c1-3-4-9-5-7-10(11-2)8-6-9/h3-8H,1-2H3/b4-3+	InChI=1S/C10H12O/c1-3-4-9-5-7-10(11-2)8-6-9/h3-8H,1-2H3/b4-3+	C10H12O	148.089	140.9	140.024	139.882	Lite	0	0	0	0	0	0	0	0	0	0
DTXCID4013241	Benzylacetone	2550-26-7	CC(=O)CCC1=CC=CC=C1	InChI=1S/C10H12O/c1-9(11)7-8-10-5-3-2-4-6-10/h2-6H,7-8H2,1H3	InChI=1S/C10H12O/c1-9(11)7-8-10-5-3-2-4-6-10/h2-6H,7-8H2,1H3	C10H12O	148.089	136.346	135.618	135.289	Lite	0	0	0	0	0	0	0	0	0	0
DTXCID4028177	Isopropyl phenyl ketone	611-70-1	CC(C)C(=O)C1=CC=CC=C1	InChI=1S/C10H12O/c1-8(2)10(11)9-6-4-3-5-7-9/h3-8H,1-2H3	InChI=1S/C10H12O/c1-8(2)10(11)9-6-4-3-5-7-9/h3-8H,1-2H3	C10H12O	148.089	136.99	136.2	136.22	Lite	0	0	0	0	0	0	0	0	0	0
DTXCID40575	Estragole	140-67-0	COC1=CC=C(CC=C)C=C1	InChI=1S/C10H12O/c1-3-4-9-5-7-10(11-2)8-6-9/h3,5-8H,1,4H2,2H3	InChI=1S/C10H12O/c1-3-4-9-5-7-10(11-2)8-6-9/h3,5-8H,1,4H2,2H3	C10H12O	148.089	139.665	139.298	139.075	Lite	0	0	0	0	0	0	0	0	0	0
DTXCID601974	4-Isopropylbenzaldehyde	122-03-2	CC(C)C1=CC=C(C=O)C=C1	InChI=1S/C10H12O/c1-8(2)10-5-3-9(7-11)4-6-10/h3-8H,1-2H3	InChI=1S/C10H12O/c1-8(2)10-5-3-9(7-11)4-6-10/h3-8H,1-2H3	C10H12O	148.089	138.549	137.82	137.226	Lite	0	0	0	0	0	0	0	0	0	0
DTXCID7030694	2,4,6-Trimethylbenzaldehyde	487-68-3	CC1=CC(C)=C(C=O)C(C)=C1	InChI=1S/C10H12O/c1-7-4-8(2)10(6-11)9(3)5-7/h4-6H,1-3H3	InChI=1S/C10H12O/c1-7-4-8(2)10(6-11)9(3)5-7/h4-6H,1-3H3	C10H12O	148.089	136.73	136.2	135.88	Lite	0	0	0	0	0	0	0	0	0	0
DTXCID7031246	3,4-Dimethyl-benzeneacetaldehyde	68844-97-3	CC1=CC=C(CC=O)C=C1C	InChI=1S/C10H12O/c1-8-3-4-10(5-6-11)7-9(8)2/h3-4,6-7H,5H2,1-2H3_x000D_	InChI=1S/C10H12O/c1-8-3-4-10(5-6-11)7-9(8)2/h3-4,6-7H,5H2,1-2H3	C10H12O	148.089	137.57	137.61	137.45	Lite	0	0	0	0	0	0	0	0	0	0
DTXCID7031111	Diethoxy(dimethyl)silane	78-62-6	CCO[Si](C)(C)OCC	InChI=1S/C6H16O2Si/c1-5-7-9(3,4)8-6-2/h5-6H2,1-4H3	InChI=1S/C6H16O2Si/c1-5-7-9(3,4)8-6-2/h5-6H2,1-4H3	C6H16O2Si	148.092	128.948	129.115	128.47	Lite	0	0	0	0	0	0	0	0	0	0
DTXCID501543	1-Chlorooctane	111-85-3	CCCCCCCCCl	InChI=1S/C8H17Cl/c1-2-3-4-5-6-7-8-9/h2-8H2,1H3	InChI=1S/C8H17Cl/c1-2-3-4-5-6-7-8-9/h2-8H2,1H3	C8H17Cl	148.102			129.984	Lite	0	0	0	0	0	0	0	0	0	0
DTXCID6021957	Ethyl orthoformate	122-51-0	CCOC(OCC)OCC	InChI=1S/C7H16O3/c1-4-8-7(9-5-2)10-6-3/h7H,4-6H2,1-3H3	InChI=1S/C7H16O3/c1-4-8-7(9-5-2)10-6-3/h7H,4-6H2,1-3H3	C7H16O3	148.11	137.928	137.485	137.534	Lite	0	0	0	0	0	0	0	0	0	0
DTXCID7024742	2,2'-[Ethane-1,2-diylbis(oxy)]diethanamine	929-59-9	NCCOCCOCCN	InChI=1S/C6H16N2O2/c7-1-3-9-5-6-10-4-2-8/h1-8H2	InChI=1S/C6H16N2O2/c7-1-3-9-5-6-10-4-2-8/h1-8H2	C6H16N2O2	148.121	135.898	136.103	135.333	Lite	0	0	0	0	0	0	0	0	0	0
DTXCID404704	4-tert-Butyltoluene	98-51-1	CC1=CC=C(C=C1)C(C)(C)C	InChI=1S/C11H16/c1-9-5-7-10(8-6-9)11(2,3)4/h5-8H,1-4H3	InChI=1S/C11H16/c1-9-5-7-10(8-6-9)11(2,3)4/h5-8H,1-4H3	C11H16	148.125			138.145	Lite	0	0	0	0	0	0	0	0	0	0
DTXCID7014286	5-Chloro-2-methyl-3(2H)-isothiazolone	26172-55-4	CN1SC(Cl)=CC1=O	InChI=1S/C4H4ClNOS/c1-6-4(7)2-3(5)8-6/h2H,1H3	InChI=1S/C4H4ClNOS/c1-6-4(7)2-3(5)8-6/h2H,1H3	C4H4ClNOS	148.97	112.968	112.336	111.644	Lite	0	0	0	0	0	0	0	0	0	0
DTXCID1025017	Sodium diethyldithiocarbamate trihydrate	20624-25-3	O.O.O.[Na+].CCN(CC)C([S-])=S	InChI=1S/C5H11NS2.Na.3H2O/c1-3-6(4-2)5(7)8;;;;/h3-4H2,1-2H3,(H,7,8);;3*1H2/q;+1;;;/p-1	InChI=1S/C5H11NS2/c1-3-6(4-2)5(7)8/h3-4H2,1-2H3,(H,7,8)	C5H11NS2	149.033			128.174	Lite	0	0	0	0	0	0	0	0	0	0
DTXCID901285	beta-Nitrostyrene	102-96-5	[O-][N+](=O)C=CC1=CC=CC=C1	InChI=1S/C8H7NO2/c10-9(11)7-6-8-4-2-1-3-5-8/h1-7H	InChI=1S/C8H7NO2/c10-9(11)7-6-8-4-2-1-3-5-8/h1-7H	C8H7NO2	149.048	133.325	135.833	135.365	Lite	0	0	0	0	0	0	0	0	0	0
DTXCID9038507	4-(2-Chloroethyl)morpholine hydrochloride (1:1)	3647-69-6	Cl.ClCCN1CCOCC1	InChI=1S/C6H12ClNO.ClH/c7-1-2-8-3-5-9-6-4-8;/h1-6H2;1H	InChI=1S/C6H12ClNO/c7-1-2-8-3-5-9-6-4-8/h1-6H2	C6H12ClNO	149.061	123.109	123.003	122.805	Lite	0	0	0	0	0	0	0	0	0	0
DTXCID5021417	2-Ethyl-2-nitro-1,3-propanediol	597-09-1	CCC(CO)(CO)[N+]([O-])=O	InChI=1S/C5H11NO4/c1-2-5(3-7,4-8)6(9)10/h7-8H,2-4H2,1H3	InChI=1S/C5H11NO4/c1-2-5(3-7,4-8)6(9)10/h7-8H,2-4H2,1H3	C5H11NO4	149.069	130.556	130.01	130.06	Lite	0	0	0	0	0	0	0	0	0	0
DTXCID4017697	N-(2,4-Dimethylphenyl)formamide	60397-77-5	CC1=CC=C(NC=O)C(C)=C1	InChI=1S/C9H11NO/c1-7-3-4-9(10-6-11)8(2)5-7/h3-6H,1-2H3,(H,10,11)	InChI=1S/C9H11NO/c1-7-3-4-9(10-6-11)8(2)5-7/h3-6H,1-2H3,(H,10,11)	C9H11NO	149.084	138.938	151.375	131.72	Standard	0	0	0	0	0	0	0	1	0	1
DTXCID5030820	N-Benzylacetamide	588-46-5	CC(=O)NCC1=CC=CC=C1	InChI=1S/C9H11NO/c1-8(11)10-7-9-5-3-2-4-6-9/h2-6H,7H2,1H3,(H,10,11)_x000D_	InChI=1S/C9H11NO/c1-8(11)10-7-9-5-3-2-4-6-9/h2-6H,7H2,1H3,(H,10,11)	C9H11NO	149.084	135.176	146.207	134.041	Standard	0	0	0	0	0	0	0	0	0	0
DTXCID601835	4-Dimethylaminobenzaldehyde	100-10-7	CN(C)C1=CC=C(C=O)C=C1	InChI=1S/C9H11NO/c1-10(2)9-5-3-8(7-11)4-6-9/h3-7H,1-2H3	InChI=1S/C9H11NO/c1-10(2)9-5-3-8(7-11)4-6-9/h3-7H,1-2H3	C9H11NO	149.084	139.059	153.38	132.88	Standard	0	0	0	0	0	0	1	0	0	1
DTXCID6024915	3-Methyl-3,4-dihydro-2H-1,4-benzoxazine	32329-20-7	CC1COC2=C(N1)C=CC=C2	InChI=1/C9H11NO/c1-7-6-11-9-5-3-2-4-8(9)10-7/h2-5,7,10H,6H2,1H3	InChI=1/C9H11NO/c1-7-6-11-9-5-3-2-4-8(9)10-7/h2-5,7,10H,6H2,1H3	C9H11NO	149.084	134.627	142.639	128.927	Standard	1	0	0	0	1	0	1	0	0	1
DTXCID101128	1-Phenyl-3,3-dimethyltriazene	7227-91-0	CN(C)N=NC1=CC=CC=C1	InChI=1S/C8H11N3/c1-11(2)10-9-8-6-4-3-5-7-8/h3-7H,1-2H3	InChI=1S/C8H11N3/c1-11(2)10-9-8-6-4-3-5-7-8/h3-7H,1-2H3	C8H11N3	149.095	138.768	138.045	137.325	Lite	0	0	0	0	0	0	0	0	0	0
DTXCID201392, DTXCID5024928	Triethanolamine, Isopropyl triethanolamine titanate	102-71-6, 36673-16-2	OCCN(CCO)CCO	InChI=1S/C6H15NO3/c8-4-1-7(2-5-9)3-6-10/h8-10H,1-6H2	InChI=1S/C6H15NO3/c8-4-1-7(2-5-9)3-6-10/h8-10H,1-6H2	C6H15NO3	149.105	128.077	128.498	130.702	Lite	0	0	0	0	0	0	0	0	0	0
DTXCID601856	4-Butylaniline	104-13-2	CCCCC1=CC=C(N)C=C1	InChI=1S/C10H15N/c1-2-3-4-9-5-7-10(11)8-6-9/h5-8H,2-4,11H2,1H3	InChI=1S/C10H15N/c1-2-3-4-9-5-7-10(11)8-6-9/h5-8H,2-4,11H2,1H3	C10H15N	149.12	139.436	138.906	138.258	Lite	0	0	0	0	0	0	0	0	0	0
DTXCID60209557	3,7-Dimethyl-2,6-octadienenitrile	5146-66-7	CC(C)=CCCC(C)=CC#N	InChI=1S/C10H15N/c1-9(2)5-4-6-10(3)7-8-11/h5,7H,4,6H2,1-3H3	InChI=1S/C10H15N/c1-9(2)5-4-6-10(3)7-8-11/h5,7H,4,6H2,1-3H3	C10H15N	149.12			139.06	Lite	0	0	0	0	0	0	0	0	0	0
DTXCID6028155	4-tert-Butylaniline	769-92-6	CC(C)(C)C1=CC=C(N)C=C1	InChI=1S/C10H15N/c1-10(2,3)8-4-6-9(11)7-5-8/h4-7H,11H2,1-3H3	InChI=1S/C10H15N/c1-10(2,3)8-4-6-9(11)7-5-8/h4-7H,11H2,1-3H3	C10H15N	149.12	137.882	137.013	136.677	Lite	0	0	0	0	0	0	0	0	0	0
DTXCID607218	2,6-Diethylaniline	579-66-8	CCC1=CC=CC(CC)=C1N	InChI=1S/C10H15N/c1-3-8-6-5-7-9(4-2)10(8)11/h5-7H,3-4,11H2,1-2H3	InChI=1S/C10H15N/c1-3-8-6-5-7-9(4-2)10(8)11/h5-7H,3-4,11H2,1-2H3	C10H15N	149.12	138.664	138.042	137.993	Lite	0	0	0	0	0	0	0	0	0	0
DTXCID701800	N,N-Diethylaniline	91-66-7	CCN(CC)C1=CC=CC=C1	InChI=1S/C10H15N/c1-3-11(4-2)10-8-6-5-7-9-10/h5-9H,3-4H2,1-2H3	InChI=1S/C10H15N/c1-3-11(4-2)10-8-6-5-7-9-10/h5-9H,3-4H2,1-2H3	C10H15N	149.12	137.483	137.563	137.117	Lite	0	0	0	0	0	0	0	0	0	0
DTXCID7024370	N-Butylaniline	1126-78-9	CCCCNC1=CC=CC=C1	InChI=1S/C10H15N/c1-2-3-9-11-10-7-5-4-6-8-10/h4-8,11H,2-3,9H2,1H3	InChI=1S/C10H15N/c1-2-3-9-11-10-7-5-4-6-8-10/h4-8,11H,2-3,9H2,1H3	C10H15N	149.12	141.025	140.653	140.621	Lite	0	0	0	0	0	0	0	0	0	0
DTXCID8024816	(2Z)-3,7-Dimethylocta-2,6-dienenitrile	31983-27-4	CC(C)=CCC\C(C)=C/C#N	InChI=1S/C10H15N/c1-9(2)5-4-6-10(3)7-8-11/h5,7H,4,6H2,1-3H3/b10-7-	InChI=1S/C10H15N/c1-9(2)5-4-6-10(3)7-8-11/h5,7H,4,6H2,1-3H3/b10-7-	C10H15N	149.12			139.126	Lite	0	0	0	0	0	0	0	0	0	0
DTXCID4020115	2,5-Dimercapto-1,3,4-thiadiazole	1072-71-5	SC1=NN=C(S)S1	InChI=1S/C2H2N2S3/c5-1-3-4-2(6)7-1/h(H,3,5)(H,4,6)	InChI=1S/C2H2N2S3/c5-1-3-4-2(6)7-1/h(H,3,5)(H,4,6)	C2H2N2S3	149.938	117.161	116.434	115.549	Lite	0	0	0	0	0	0	0	0	0	0
DTXCID0024397, DTXCID0024397	Lithium trifluoromethanesulfonate, Trifluoromethanesulfonic acid	33454-82-9, 1493-13-6	[Li+].[O-]S(=O)(=O)C(F)(F)F	InChI=1S/CHF3O3S.Li/c2-1(3,4)8(5,6)7;/h(H,5,6,7);/q;+1/p-1_x000D_	InChI=1S/CHF3O3S/c2-1(3,4)8(5,6)7/h(H,5,6,7)	CHF3O3S	149.96			107.904	Lite	0	0	0	0	0	1	0	0	0	0
DTXCID80545	2,5-Dithiobiurea	142-46-1	NC(=S)NNC(N)=S	InChI=1S/C2H6N4S2/c3-1(7)5-6-2(4)8/h(H3,3,5,7)(H3,4,6,8)	InChI=1S/C2H6N4S2/c3-1(7)5-6-2(4)8/h(H3,3,5,7)(H3,4,6,8)	C2H6N4S2	150.003	129.134	128.8	126.438	Lite	0	0	0	0	0	0	0	0	0	0
DTXCID3026986	dl-Tartaric acid	133-37-9	OC(C(O)C(O)=O)C(O)=O	InChI=1/C4H6O6/c5-1(3(7)8)2(6)4(9)10/h1-2,5-6H,(H,7,8)(H,9,10)	InChI=1/C4H6O6/c5-1(3(7)8)2(6)4(9)10/h1-2,5-6H,(H,7,8)(H,9,10)	C4H6O6	150.016	128.689	127.198	127.619	Lite	0	0	0	0	1	0	0	0	0	0
DTXCID3026986	L-Tartaric acid	87-69-4	O[C@H]([C@@H](O)C(O)=O)C(O)=O	InChI=1S/C4H6O6/c5-1(3(7)8)2(6)4(9)10/h1-2,5-6H,(H,7,8)(H,9,10)/t1-,2-/m1/s1	InChI=1S/C4H6O6/c5-1(3(7)8)2(6)4(9)10/h1-2,5-6H,(H,7,8)(H,9,10)/t1-,2-/m1/s1	C4H6O6	150.016	130.124	126.638	126.706	Lite	0	0	0	0	0	0	0	0	0	0
DTXCID804467	2-Aminobenzothiazole	136-95-8	NC1=NC2=C(S1)C=CC=C2	InChI=1S/C7H6N2S/c8-7-9-5-3-1-2-4-6(5)10-7/h1-4H,(H2,8,9)	InChI=1S/C7H6N2S/c8-7-9-5-3-1-2-4-6(5)10-7/h1-4H,(H2,8,9)	C7H6N2S	150.025	123.357	124.09	123.815	Lite	0	0	0	0	0	0	0	0	0	0
DTXCID805536	2-Mercaptobenzimidazole	583-39-1	S=C1NC2=CC=CC=C2N1	InChI=1S/C7H6N2S/c10-7-8-5-3-1-2-4-6(5)9-7/h1-4H,(H2,8,9,10)	InChI=1S/C7H6N2S/c10-7-8-5-3-1-2-4-6(5)9-7/h1-4H,(H2,8,9,10)	C7H6N2S	150.025	128.268	127.379	126.72	Lite	0	0	0	0	0	0	0	1	0	0
DTXCID9021261	1-Allyloxy-3-chloro-2-propanol	4638-03-03	OC(CCl)COCC=C	InChI=1/C6H11ClO2/c1-2-3-9-5-6(8)4-7/h2,6,8H,1,3-5H2	InChI=1/C6H11ClO2/c1-2-3-9-5-6(8)4-7/h2,6,8H,1,3-5H2	C6H11ClO2	150.045	125.654	125.263	125.28	Lite	0	0	0	0	0	0	0	0	0	0
DTXCID50209607	D-Ribose	50-69-1	OC[C@@H](O)[C@@H](O)[C@@H](O)C=O	InChI=1S/C5H10O5/c6-1-3(8)5(10)4(9)2-7/h1,3-5,7-10H,2H2/t3-,4+,5-/m0/s1	InChI=1S/C5H10O5/c6-1-3(8)5(10)4(9)2-7/h1,3-5,7-10H,2H2/t3-,4+,5-/m0/s1	C5H10O5	150.053	130.274	128.968	128.935	Lite	0	0	0	0	0	0	0	0	0	0
DTXCID50209607	Arabinose	147-81-9	OC[C@@H](O)[C@@H](O)[C@H](O)C=O	InChI=1S/C5H10O5/c6-1-3(8)5(10)4(9)2-7/h1,3-5,7-10H,2H2/t3-,4-,5+/m1/s1	InChI=1S/C5H10O5/c6-1-3(8)5(10)4(9)2-7/h1,3-5,7-10H,2H2/t3-,4-,5+/m1/s1	C5H10O5	150.053	129.916	130.064	130.33	Lite	0	0	0	0	0	0	0	0	0	0
DTXCID50209607	L-Arabinose	5328-37-0	OC[C@H](O)[C@H](O)[C@@H](O)C=O	InChI=1S/C5H10O5/c6-1-3(8)5(10)4(9)2-7/h1,3-5,7-10H,2H2/t3-,4-,5+/m0/s1_x000D_	InChI=1S/C5H10O5/c6-1-3(8)5(10)4(9)2-7/h1,3-5,7-10H,2H2/t3-,4-,5+/m0/s1	C5H10O5	150.053	131.509	130.402	130.598	Lite	0	0	0	0	0	0	0	0	0	0
DTXCID60209350	L-Arabinopyranose	87-72-9	O[C@@H]1CO[C@@H](O)[C@@H](O)[C@@H]1O	InChI=1S/C5H10O5/c6-2-1-10-5(9)4(8)3(2)7/h2-9H,1H2/t2-,3-,4+,5-/m1/s1_x000D_	InChI=1S/C5H10O5/c6-2-1-10-5(9)4(8)3(2)7/h2-9H,1H2/t2-,3-,4+,5-/m1/s1	C5H10O5	150.053	125.807	126.39	126.81	Lite	0	0	0	0	0	0	0	0	0	0
DTXCID60209350	D-Xylose	58-86-6	O[C@@H]1COC(O)[C@H](O)[C@H]1O	InChI=1S/C5H10O5/c6-2-1-10-5(9)4(8)3(2)7/h2-9H,1H2/t2-,3+,4-,5?/m1/s1	InChI=1S/C5H10O5/c6-2-1-10-5(9)4(8)3(2)7/h2-9H,1H2/t2-,3+,4-,5?/m1/s1	C5H10O5	150.053	127.009	124.28	124.696	Lite	0	0	0	0	0	0	0	0	0	0
DTXCID302096	Dipropyl disulfide	629-19-6	CCCSSCCC	InChI=1S/C6H14S2/c1-3-5-7-8-6-4-2/h3-6H2,1-2H3	InChI=1S/C6H14S2/c1-3-5-7-8-6-4-2/h3-6H2,1-2H3	C6H14S2	150.054				NA	0	0	0	0	0	0	0	0	0	0
DTXCID2018843	Chloro(1,1-dimethylethyl)dimethylsilane	18162-48-6	CC(C)(C)[Si](C)(C)Cl	InChI=1S/C6H15ClSi/c1-6(2,3)8(4,5)7/h1-5H3_x000D_	InChI=1S/C6H15ClSi/c1-6(2,3)8(4,5)7/h1-5H3	C6H15ClSi	150.063				NA	0	0	0	0	0	0	0	0	0	0
DTXCID0024347	4'-Methoxyacetophenone	100-06-1	COC1=CC=C(C=C1)C(C)=O	InChI=1S/C9H10O2/c1-7(10)8-3-5-9(11-2)6-4-8/h3-6H,1-2H3	InChI=1S/C9H10O2/c1-7(10)8-3-5-9(11-2)6-4-8/h3-6H,1-2H3	C9H10O2	150.068	137.546	136.753	136.39	Lite	0	0	0	0	0	0	0	0	0	0
DTXCID0027064	Hydrocinnamic acid	501-52-0	OC(=O)CCC1=CC=CC=C1	InChI=1S/C9H10O2/c10-9(11)7-6-8-4-2-1-3-5-8/h1-5H,6-7H2,(H,10,11)	InChI=1S/C9H10O2/c10-9(11)7-6-8-4-2-1-3-5-8/h1-5H,6-7H2,(H,10,11)	C9H10O2	150.068			133.676	Lite	0	0	0	0	0	0	0	0	0	0
DTXCID1018696	Ethyl benzoate	93-89-0	CCOC(=O)C1=CC=CC=C1	InChI=1S/C9H10O2/c1-2-11-9(10)8-6-4-3-5-7-8/h3-7H,2H2,1H3	InChI=1S/C9H10O2/c1-2-11-9(10)8-6-4-3-5-7-8/h3-7H,2H2,1H3	C9H10O2	150.068	135.515	135.139	135.518	Lite	0	0	0	0	0	0	0	0	0	0
DTXCID40151	Benzyl acetate	140-11-4	CC(=O)OCC1=CC=CC=C1	InChI=1S/C9H10O2/c1-8(10)11-7-9-5-3-2-4-6-9/h2-6H,7H2,1H3	InChI=1S/C9H10O2/c1-8(10)11-7-9-5-3-2-4-6-9/h2-6H,7H2,1H3	C9H10O2	150.068	136.272	135.897	135.557	Lite	0	0	0	0	0	0	0	0	0	0
DTXCID705668	Methyl 4-methylbenzoate	99-75-2	COC(=O)C1=CC=C(C)C=C1	InChI=1S/C9H10O2/c1-7-3-5-8(6-4-7)9(10)11-2/h3-6H,1-2H3	InChI=1S/C9H10O2/c1-7-3-5-8(6-4-7)9(10)11-2/h3-6H,1-2H3	C9H10O2	150.068	137.236	136.887	136.739	Lite	0	0	0	0	0	0	0	0	0	0
DTXCID8026567	4-Tolyl acetate	140-39-6	CC(=O)OC1=CC=C(C)C=C1	InChI=1S/C9H10O2/c1-7-3-5-9(6-4-7)11-8(2)10/h3-6H,1-2H3	InChI=1S/C9H10O2/c1-7-3-5-9(6-4-7)11-8(2)10/h3-6H,1-2H3	C9H10O2	150.068	137.227	136.495	136.455	Lite	0	0	0	0	0	0	0	0	0	0
DTXCID8028183	Methyl 2-methylbenzoate	89-71-4	COC(=O)C1=C(C)C=CC=C1	InChI=1S/C9H10O2/c1-7-5-3-4-6-8(7)9(10)11-2/h3-6H,1-2H3	InChI=1S/C9H10O2/c1-7-5-3-4-6-8(7)9(10)11-2/h3-6H,1-2H3	C9H10O2	150.068	135.059	134.429	134.382	Lite	0	0	0	0	0	0	0	0	0	0
DTXCID8031102	2-Methoxy-4-vinylphenol	7786-61-0	COC1=C(O)C=CC(C=C)=C1	InChI=1S/C9H10O2/c1-3-7-4-5-8(10)9(6-7)11-2/h3-6,10H,1H2,2H3	InChI=1S/C9H10O2/c1-3-7-4-5-8(10)9(6-7)11-2/h3-6,10H,1H2,2H3	C9H10O2	150.068	136.156	135.997	135.953	Lite	0	0	0	0	0	0	0	0	0	0
DTXCID9024352	Methyl phenylacetate	101-41-7	COC(=O)CC1=CC=CC=C1	InChI=1S/C9H10O2/c1-11-9(10)7-8-5-3-2-4-6-8/h2-6H,7H2,1H3	InChI=1S/C9H10O2/c1-11-9(10)7-8-5-3-2-4-6-8/h2-6H,7H2,1H3	C9H10O2	150.068	134.716	134.517	134.195	Lite	0	0	0	0	0	0	0	0	0	0
DTXCID7024407	3-Amino-4-methylbenzamide	19406-86-1	CC1=C(N)C=C(C=C1)C(N)=O	InChI=1S/C8H10N2O/c1-5-2-3-6(8(10)11)4-7(5)9/h2-4H,9H2,1H3,(H2,10,11)	InChI=1S/C8H10N2O/c1-5-2-3-6(8(10)11)4-7(5)9/h2-4H,9H2,1H3,(H2,10,11)	C8H10N2O	150.079	135.45	134.613	134.813	Lite	0	0	1	0	0	0	0	0	0	1
DTXCID805138	N,N-Dimethyl-4-nitrosoaniline	138-89-6	CN(C)C1=CC=C(C=C1)N=O	InChI=1S/C8H10N2O/c1-10(2)8-5-3-7(9-11)4-6-8/h3-6H,1-2H3	InChI=1S/C8H10N2O/c1-10(2)8-5-3-7(9-11)4-6-8/h3-6H,1-2H3	C8H10N2O	150.079	136.731	135.424	135.281	Lite	0	1	0	0	0	0	0	0	0	1
DTXCID601393	Triethylene glycol	112-27-6	OCCOCCOCCO	InChI=1S/C6H14O4/c7-1-3-9-5-6-10-4-2-8/h7-8H,1-6H2	InChI=1S/C6H14O4/c7-1-3-9-5-6-10-4-2-8/h7-8H,1-6H2	C6H14O4	150.089	135.146	133.909	134.685	Lite	0	0	0	0	0	0	0	0	0	0
DTXCID102331	2-(Butan-2-yl)phenol	89-72-5	CCC(C)C1=C(O)C=CC=C1	InChI=1/C10H14O/c1-3-8(2)9-6-4-5-7-10(9)11/h4-8,11H,3H2,1-2H3	InChI=1/C10H14O/c1-3-8(2)9-6-4-5-7-10(9)11/h4-8,11H,3H2,1-2H3	C10H14O	150.105	136.969	136.648	136.433	Lite	0	0	0	0	0	0	0	0	0	0
DTXCID1027425	4-Butylphenol	1638-22-8	CCCCC1=CC=C(O)C=C1	InChI=1S/C10H14O/c1-2-3-4-9-5-7-10(11)8-6-9/h5-8,11H,2-4H2,1H3	InChI=1S/C10H14O/c1-2-3-4-9-5-7-10(11)8-6-9/h5-8,11H,2-4H2,1H3	C10H14O	150.105	139.463	138.584	138.461	Lite	0	0	0	0	0	1	0	0	1	0
DTXCID206525	2-tert-Butylphenol	88-18-6	CC(C)(C)C1=C(O)C=CC=C1	InChI=1S/C10H14O/c1-10(2,3)8-6-4-5-7-9(8)11/h4-7,11H,1-3H3	InChI=1S/C10H14O/c1-10(2,3)8-6-4-5-7-9(8)11/h4-7,11H,1-3H3	C10H14O	150.105	134.819	134.254	134.046	Lite	0	0	0	0	0	0	0	0	0	0
DTXCID301626	4-Isopropylbenzyl alcohol	536-60-7	CC(C)C1=CC=C(CO)C=C1	InChI=1S/C10H14O/c1-8(2)10-5-3-9(7-11)4-6-10/h3-6,8,11H,7H2,1-2H3	InChI=1S/C10H14O/c1-8(2)10-5-3-9(7-11)4-6-10/h3-6,8,11H,7H2,1-2H3	C10H14O	150.105	139.926	139.297	139.091	Lite	0	0	0	0	0	0	0	0	0	0
DTXCID4014972	Thymol	89-83-8	CC(C)C1=CC=C(C)C=C1O	InChI=1S/C10H14O/c1-7(2)9-5-4-8(3)6-10(9)11/h4-7,11H,1-3H3	InChI=1S/C10H14O/c1-7(2)9-5-4-8(3)6-10(9)11/h4-7,11H,1-3H3	C10H14O	150.105	138.691	138.133	138.219	Lite	0	0	0	0	0	0	0	0	0	0
DTXCID4022074	Isopropyl-o-cresol	499-75-2	CC(C)C1=CC=C(C)C(O)=C1	InChI=1S/C10H14O/c1-7(2)9-5-4-8(3)10(11)6-9/h4-7,11H,1-3H3	InChI=1S/C10H14O/c1-7(2)9-5-4-8(3)10(11)6-9/h4-7,11H,1-3H3	C10H14O	150.105	138.911	138.032	138.031	Lite	0	0	0	1	0	0	0	0	1	0
DTXCID502332	4-(Butan-2-yl)phenol	99-71-8	CCC(C)C1=CC=C(O)C=C1	InChI=1/C10H14O/c1-3-8(2)9-4-6-10(11)7-5-9/h4-8,11H,3H2,1-2H3	InChI=1/C10H14O/c1-3-8(2)9-4-6-10(11)7-5-9/h4-8,11H,3H2,1-2H3	C10H14O	150.105	139.511	138.69	138.521	Lite	0	0	0	0	0	0	0	0	0	0
DTXCID5028087	L-Verbenone	1196-01-6	CC1=CC(=O)[C@H]2C[C@@H]1C2(C)C	InChI=1S/C10H14O/c1-6-4-9(11)8-5-7(6)10(8,2)3/h4,7-8H,5H2,1-3H3/t7-,8+/m0/s1	InChI=1S/C10H14O/c1-6-4-9(11)8-5-7(6)10(8,2)3/h4,7-8H,5H2,1-3H3/t7-,8+/m0/s1	C10H14O	150.105	134.182	133.698	133.529	Lite	0	0	0	0	0	0	0	0	0	0
DTXCID6027426	dl-Carvone	99-49-0	CC(=C)C1CC=C(C)C(=O)C1	InChI=1/C10H14O/c1-7(2)9-5-4-8(3)10(11)6-9/h4,9H,1,5-6H2,2-3H3	InChI=1/C10H14O/c1-7(2)9-5-4-8(3)10(11)6-9/h4,9H,1,5-6H2,2-3H3	C10H14O	150.105	138.624	138.194	138.025	Lite	0	0	0	0	0	0	0	0	0	0
DTXCID6027426	R-(-)-Carvone	6485-40-1	CC(=C)[C@@H]1CC=C(C)C(=O)C1	InChI=1S/C10H14O/c1-7(2)9-5-4-8(3)10(11)6-9/h4,9H,1,5-6H2,2-3H3/t9-/m1/s1	InChI=1S/C10H14O/c1-7(2)9-5-4-8(3)10(11)6-9/h4,9H,1,5-6H2,2-3H3/t9-/m1/s1	C10H14O	150.105	136.256	135.645	135.523	Lite	0	0	0	0	0	0	0	0	0	0
DTXCID6027426	d-Carvone	2244-16-8	CC(=C)[C@H]1CC=C(C)C(=O)C1	InChI=1S/C10H14O/c1-7(2)9-5-4-8(3)10(11)6-9/h4,9H,1,5-6H2,2-3H3/t9-/m0/s1	InChI=1S/C10H14O/c1-7(2)9-5-4-8(3)10(11)6-9/h4,9H,1,5-6H2,2-3H3/t9-/m0/s1	C10H14O	150.105	138.003	137.607	137.557	Lite	0	0	0	0	0	0	0	0	0	0
DTXCID7024825	3-tert-Butylphenol	585-34-2	CC(C)(C)C1=CC=CC(O)=C1	InChI=1S/C10H14O/c1-10(2,3)8-5-4-6-9(11)7-8/h4-7,11H,1-3H3	InChI=1S/C10H14O/c1-10(2,3)8-5-4-6-9(11)7-8/h4-7,11H,1-3H3	C10H14O	150.105	137.319	136.469	136.371	Lite	0	0	0	0	1	0	0	0	1	0
DTXCID7027463	Corodane	13380-94-4	O=C1CC2CC1C1CCCC21	InChI=1/C10H14O/c11-10-5-6-4-9(10)8-3-1-2-7(6)8/h6-9H,1-5H2	InChI=1/C10H14O/c11-10-5-6-4-9(10)8-3-1-2-7(6)8/h6-9H,1-5H2	C10H14O	150.105	130.403	130.506	130.202	Lite	0	0	0	0	0	0	0	0	0	0
DTXCID704890	p-Cymen-8-ol	1197-01-9	CC1=CC=C(C=C1)C(C)(C)O	InChI=1S/C10H14O/c1-8-4-6-9(7-5-8)10(2,3)11/h4-7,11H,1-3H3	InChI=1S/C10H14O/c1-8-4-6-9(7-5-8)10(2,3)11/h4-7,11H,1-3H3	C10H14O	150.105	137.843	137.387	137.202	Lite	0	0	0	0	0	0	0	0	0	0
DTXCID8022325	4-Propylanisole	104-45-0	CCCC1=CC=C(OC)C=C1	InChI=1S/C10H14O/c1-3-4-9-5-7-10(11-2)8-6-9/h5-8H,3-4H2,1-2H3	InChI=1S/C10H14O/c1-3-4-9-5-7-10(11-2)8-6-9/h5-8H,3-4H2,1-2H3	C10H14O	150.105	140.633	140.005	139.34	Lite	0	0	0	0	0	0	0	0	0	0
DTXCID90221	4-tert-Butylphenol	98-54-4	CC(C)(C)C1=CC=C(O)C=C1	InChI=1S/C10H14O/c1-10(2,3)8-4-6-9(11)7-5-8/h4-7,11H,1-3H3	InChI=1S/C10H14O/c1-10(2,3)8-4-6-9(11)7-5-8/h4-7,11H,1-3H3	C10H14O	150.105	137.567	136.615	136.503	Lite	0	0	0	0	0	0	0	0	0	0
DTXCID9027601	2-Methyl-1-phenylpropan-2-ol	100-86-7	CC(C)(O)CC1=CC=CC=C1	InChI=1S/C10H14O/c1-10(2,11)8-9-6-4-3-5-7-9/h3-7,11H,8H2,1-2H3	InChI=1S/C10H14O/c1-10(2,11)8-9-6-4-3-5-7-9/h3-7,11H,8H2,1-2H3	C10H14O	150.105	136.491	135.7	135.963	Lite	0	0	0	0	0	0	0	0	0	0
DTXCID9030412	(S)-4-Isopropenyl-1-cyclohexene-1-carboxaldehyde	18031-40-8	CC(=C)[C@H]1CCC(C=O)=CC1	InChI=1S/C10H14O/c1-8(2)10-5-3-9(7-11)4-6-10/h3,7,10H,1,4-6H2,2H3/t10-/m1/s1	InChI=1S/C10H14O/c1-8(2)10-5-3-9(7-11)4-6-10/h3,7,10H,1,4-6H2,2H3/t10-/m1/s1	C10H14O	150.105	137.312	136.991	136.843	Lite	0	0	0	0	0	0	0	0	0	0
DTXCID40210242	1,3,5-Undecatriene	16356-11-9	CCCCCC=CC=CC=C	InChI=1S/C11H18/c1-3-5-7-9-11-10-8-6-4-2/h3,5,7,9,11H,1,4,6,8,10H2,2H3	InChI=1S/C11H18/c1-3-5-7-9-11-10-8-6-4-2/h3,5,7,9,11H,1,4,6,8,10H2,2H3	C11H18	150.141				NA	0	0	0	0	0	0	0	0	0	0
DTXCID3012523	1,2-Benzisothiazolin-3-one	2634-33-5	O=C1NSC2=C1C=CC=C2	InChI=1S/C7H5NOS/c9-7-5-3-1-2-4-6(5)10-8-7/h1-4H,(H,8,9)	InChI=1S/C7H5NOS/c9-7-5-3-1-2-4-6(5)10-8-7/h1-4H,(H,8,9)	C7H5NOS	151.009	122.979	122.646	122.429	Lite	0	0	0	0	0	0	1	0	0	0
DTXCID8048862	2(3H)-Benzothiazolone	934-34-9	OC1=NC2=CC=CC=C2S1	InChI=1S/C7H5NOS/c9-7-8-5-3-1-2-4-6(5)10-7/h1-4H,(H,8,9)_x000D_	InChI=1S/C7H5NOS/c9-7-8-5-3-1-2-4-6(5)10-7/h1-4H,(H,8,9)	C7H5NOS	151.009	124.226	123.647	123.522	Lite	0	0	0	0	0	0	0	0	0	0
DTXCID8030263	4-Chlorophenylacetonitrile	140-53-4	ClC1=CC=C(CC#N)C=C1	InChI=1S/C8H6ClN/c9-8-3-1-7(2-4-8)5-6-10/h1-4H,5H2	InChI=1S/C8H6ClN/c9-8-3-1-7(2-4-8)5-6-10/h1-4H,5H2	C8H6ClN	151.019			124.873	Lite	0	0	0	0	0	0	0	0	0	0
DTXCID207034	2-(Hydroxymethyl)-2-nitro-1,3-propanediol	126-11-4	OCC(CO)(CO)[N+]([O-])=O	InChI=1S/C4H9NO5/c6-1-4(2-7,3-8)5(9)10/h6-8H,1-3H2	InChI=1S/C4H9NO5/c6-1-4(2-7,3-8)5(9)10/h6-8H,1-3H2	C4H9NO5	151.048	129.449	128.142	128.536	Lite	0	0	0	0	0	0	0	0	0	0
DTXCID6031049	Guanine	73-40-5	NC1=NC2=C(N=CN2)C(=O)N1	InChI=1S/C5H5N5O/c6-5-9-3-2(4(11)10-5)7-1-8-3/h1H,(H4,6,7,8,9,10,11)_x000D_	InChI=1S/C5H5N5O/c6-5-9-3-2(4(11)10-5)7-1-8-3/h1H,(H4,6,7,8,9,10,11)	C5H5N5O	151.049	127.589	128.146	128.03	Lite	0	0	0	0	0	0	0	0	0	0
DTXCID0027016	Potassium anilinoacetate	19525-59-8	[K+].[O-]C(=O)CNC1=CC=CC=C1	InChI=1S/C8H9NO2.K/c10-8(11)6-9-7-4-2-1-3-5-7;/h1-5,9H,6H2,(H,10,11);/q;+1/p-1	InChI=1S/C8H9NO2/c10-8(11)6-9-7-4-2-1-3-5-7/h1-5,9H,6H2,(H,10,11)	C8H9NO2	151.063	135.617	135.625	135.397	Lite	0	0	0	0	0	1	0	0	0	0
DTXCID105567	Methyl 2-aminobenzoate	134-20-3	COC(=O)C1=C(N)C=CC=C1	InChI=1S/C8H9NO2/c1-11-8(10)6-4-2-3-5-7(6)9/h2-5H,9H2,1H3	InChI=1S/C8H9NO2/c1-11-8(10)6-4-2-3-5-7(6)9/h2-5H,9H2,1H3	C8H9NO2	151.063	133.152	132.449	132.636	Lite	0	0	0	0	0	0	0	0	0	0
DTXCID106513	cis-1,2,3,6-Tetrahydrophthalimide	1469-48-3	O=C1NC(=O)[C@@H]2CC=CC[C@H]12	InChI=1S/C8H9NO2/c10-7-5-3-1-2-4-6(5)8(11)9-7/h1-2,5-6H,3-4H2,(H,9,10,11)/t5-,6+	InChI=1/C8H9NO2/c10-7-5-3-1-2-4-6(5)8(11)9-7/h1-2,5-6H,3-4H2,(H,9,10,11)/t5-,6+	C8H9NO2	151.063	130.706	130.033	130.316	Lite	1	0	0	0	1	0	1	0	0	1
DTXCID106513	1,2,3,6-Tetrahydrophthalimide	85-40-5	O=C1NC(=O)C2CC=CCC12	InChI=1/C8H9NO2/c10-7-5-3-1-2-4-6(5)8(11)9-7/h1-2,5-6H,3-4H2,(H,9,10,11)	InChI=1/C8H9NO2/c10-7-5-3-1-2-4-6(5)8(11)9-7/h1-2,5-6H,3-4H2,(H,9,10,11)	C8H9NO2	151.063	130.83	129.987	130.35	Lite	0	0	0	0	0	0	0	0	0	0
DTXCID205134	1,3-Dimethyl-2-nitrobenzene	81-20-9	CC1=CC=CC(C)=C1[N+]([O-])=O	InChI=1S/C8H9NO2/c1-6-4-3-5-7(2)8(6)9(10)11/h3-5H,1-2H3	InChI=1S/C8H9NO2/c1-6-4-3-5-7(2)8(6)9(10)11/h3-5H,1-2H3	C8H9NO2	151.063	133.217	132.777	132.024	Lite	0	0	0	0	0	0	0	0	0	0
DTXCID402082	2-Acetamidophenol	614-80-2	CC(=O)NC1=C(O)C=CC=C1	InChI=1S/C8H9NO2/c1-6(10)9-7-4-2-3-5-8(7)11/h2-5,11H,1H3,(H,9,10)	InChI=1S/C8H9NO2/c1-6(10)9-7-4-2-3-5-8(7)11/h2-5,11H,1H3,(H,9,10)	C8H9NO2	151.063	133.65	132.751	132.766	Lite	0	0	0	0	0	0	0	1	0	1
DTXCID405132	1,2-Dimethyl-3-nitrobenzene	83-41-0	CC1=CC=CC(=C1C)[N+]([O-])=O	InChI=1S/C8H9NO2/c1-6-4-3-5-8(7(6)2)9(10)11/h3-5H,1-2H3	InChI=1S/C8H9NO2/c1-6-4-3-5-8(7(6)2)9(10)11/h3-5H,1-2H3	C8H9NO2	151.063	132.59	133.142	132.816	Lite	0	0	0	0	0	0	0	0	0	0
DTXCID605135	1,3-Dimethyl-4-nitrobenzene	89-87-2	CC1=CC(C)=C(C=C1)[N+]([O-])=O	InChI=1S/C8H9NO2/c1-6-3-4-8(9(10)11)7(2)5-6/h3-5H,1-2H3	InChI=1S/C8H9NO2/c1-6-3-4-8(9(10)11)7(2)5-6/h3-5H,1-2H3	C8H9NO2	151.063	134.36	134.421	134.094	Lite	0	0	0	0	0	0	0	0	0	0
DTXCID606	Acetaminophen	103-90-2	CC(=O)NC1=CC=C(O)C=C1	InChI=1S/C8H9NO2/c1-6(10)9-7-2-4-8(11)5-3-7/h2-5,11H,1H3,(H,9,10)	InChI=1S/C8H9NO2/c1-6(10)9-7-2-4-8(11)5-3-7/h2-5,11H,1H3,(H,9,10)	C8H9NO2	151.063	136.25	135.695	134.866	Lite	0	0	0	0	0	0	1	0	0	1
DTXCID805133	1,2-Dimethyl-4-nitrobenzene	99-51-4	CC1=CC=C(C=C1C)[N+]([O-])=O	InChI=1S/C8H9NO2/c1-6-3-4-8(9(10)11)5-7(6)2/h3-5H,1-2H3	InChI=1S/C8H9NO2/c1-6-3-4-8(9(10)11)5-7(6)2/h3-5H,1-2H3	C8H9NO2	151.063	135.835	134.754	134.631	Lite	0	0	0	0	0	0	0	0	0	0
DTXCID8021199	2-((Dimethylamino)methyl)phenol	120-65-0	CN(C)CC1=CC=CC=C1O	InChI=1S/C9H13NO/c1-10(2)7-8-5-3-4-6-9(8)11/h3-6,11H,7H2,1-2H3	InChI=1S/C9H13NO/c1-10(2)7-8-5-3-4-6-9(8)11/h3-6,11H,7H2,1-2H3	C9H13NO	151.1	136.085	135.76	135.926	Lite	0	0	0	0	0	0	0	0	0	0
DTXCID9024356	N-Benzylethanolamine	104-63-2	OCCNCC1=CC=CC=C1	InChI=1S/C9H13NO/c11-7-6-10-8-9-4-2-1-3-5-9/h1-5,10-11H,6-8H2	InChI=1S/C9H13NO/c11-7-6-10-8-9-4-2-1-3-5-9/h1-5,10-11H,6-8H2	C9H13NO	151.1	139.755	138.809	138.745	Lite	0	0	0	0	0	0	0	0	0	0
DTXCID2031322	Methyl bromoacetate	96-32-2	COC(=O)CBr	InChI=1S/C3H5BrO2/c1-6-3(5)2-4/h2H2,1H3_x000D_	InChI=1S/C3H5BrO2/c1-6-3(5)2-4/h2H2,1H3	C3H5BrO2	151.947	108.758	108.264	107.775	Lite	0	0	0	0	0	0	0	0	0	0
DTXCID207233	2-Bromopropionic acid	598-72-1	CC(Br)C(O)=O	InChI=1/C3H5BrO2/c1-2(4)3(5)6/h2H,1H3,(H,5,6)	InChI=1/C3H5BrO2/c1-2(4)3(5)6/h2H,1H3,(H,5,6)	C3H5BrO2	151.947			108.094	Lite	0	0	0	0	0	0	0	0	0	0
DTXCID2015209	Oxypurinol	2465-59-0	O=C1NC2=NNC=C2C(=O)N1	InChI=1S/C5H4N4O2/c10-4-2-1-6-9-3(2)7-5(11)8-4/h1H,(H3,6,7,8,9,10,11)	InChI=1S/C5H4N4O2/c10-4-2-1-6-9-3(2)7-5(11)8-4/h1H,(H3,6,7,8,9,10,11)	C5H4N4O2	152.033	127.824	127.882	127.547	Lite	0	1	0	0	0	0	0	0	0	1
DTXCID801134	1-Phenyl-2-thiourea	103-85-5	NC(=S)NC1=CC=CC=C1	InChI=1S/C7H8N2S/c8-7(10)9-6-4-2-1-3-5-6/h1-5H,(H3,8,9,10)	InChI=1S/C7H8N2S/c8-7(10)9-6-4-2-1-3-5-6/h1-5H,(H3,8,9,10)	C7H8N2S	152.041	131.978	131.308	130.94	Lite	0	0	1	0	0	0	0	0	0	1
DTXCID301969	4-Hydroxy-3-methoxybenzaldehyde	121-33-5	COC1=C(O)C=CC(C=O)=C1	InChI=1S/C8H8O3/c1-11-8-4-6(5-9)2-3-7(8)10/h2-5,10H,1H3	InChI=1S/C8H8O3/c1-11-8-4-6(5-9)2-3-7(8)10/h2-5,10H,1H3	C8H8O3	152.047	136.835	134.795	134.476	Lite	0	0	0	1	0	0	0	0	0	1
DTXCID402529	Methylparaben	99-76-3	COC(=O)C1=CC=C(O)C=C1	InChI=1S/C8H8O3/c1-11-8(10)6-2-4-7(9)5-3-6/h2-5,9H,1H3	InChI=1S/C8H8O3/c1-11-8(10)6-2-4-7(9)5-3-6/h2-5,9H,1H3	C8H8O3	152.047	134.609	134.435	134.055	Lite	0	0	0	0	1	0	0	0	0	1
DTXCID405873	Phenoxyacetic acid	122-59-8	OC(=O)COC1=CC=CC=C1	InChI=1S/C8H8O3/c9-8(10)6-11-7-4-2-1-3-5-7/h1-5H,6H2,(H,9,10)	InChI=1S/C8H8O3/c9-8(10)6-11-7-4-2-1-3-5-7/h1-5H,6H2,(H,9,10)	C8H8O3	152.047	133.784	133.33	133.297	Lite	0	0	0	0	0	0	0	0	0	0
DTXCID805659	Methyl salicylate	119-36-8	COC(=O)C1=C(O)C=CC=C1	InChI=1S/C8H8O3/c1-11-8(10)6-4-2-3-5-7(6)9/h2-5,9H,1H3	InChI=1S/C8H8O3/c1-11-8(10)6-4-2-3-5-7(6)9/h2-5,9H,1H3	C8H8O3	152.047	131.859	131.745	131.71	Lite	0	0	0	0	0	0	0	0	0	0
DTXCID405632	4-Methyl-2-nitroaniline	89-62-3	CC1=CC(=C(N)C=C1)[N+]([O-])=O	InChI=1S/C7H8N2O2/c1-5-2-3-6(8)7(4-5)9(10)11/h2-4H,8H2,1H3	InChI=1S/C7H8N2O2/c1-5-2-3-6(8)7(4-5)9(10)11/h2-4H,8H2,1H3	C7H8N2O2	152.059	133.877	133.415	133.308	Lite	0	0	0	0	0	0	1	0	0	1
DTXCID60959	2-Methyl-5-nitroaniline	99-55-8	CC1=C(N)C=C(C=C1)[N+]([O-])=O	InChI=1S/C7H8N2O2/c1-5-2-3-6(9(10)11)4-7(5)8/h2-4H,8H2,1H3	InChI=1S/C7H8N2O2/c1-5-2-3-6(9(10)11)4-7(5)8/h2-4H,8H2,1H3	C7H8N2O2	152.059	134.057	133.532	133.147	Lite	0	0	0	0	0	1	0	0	0	1
DTXCID9024437	3,5-Diaminobenzoic acid	535-87-5	NC1=CC(=CC(N)=C1)C(O)=O	InChI=1S/C7H8N2O2/c8-5-1-4(7(10)11)2-6(9)3-5/h1-3H,8-9H2,(H,10,11)	InChI=1S/C7H8N2O2/c8-5-1-4(7(10)11)2-6(9)3-5/h1-3H,8-9H2,(H,10,11)	C7H8N2O2	152.059	135.078	133.851	134.011	Lite	0	0	0	0	0	0	0	0	0	0
DTXCID103845	Acenaphthylene	208-96-8	C1=CC2=C3C1=CC=CC3=CC=C2	InChI=1S/C12H8/c1-3-9-4-2-6-11-8-7-10(5-1)12(9)11/h1-8H	InChI=1S/C12H8/c1-3-9-4-2-6-11-8-7-10(5-1)12(9)11/h1-8H	C12H8	152.063			130.753	Lite	0	0	0	0	0	0	0	0	0	0
DTXCID3021431	2-Isopropoxyphenol	4812-20-8	CC(C)OC1=C(O)C=CC=C1	InChI=1S/C9H12O2/c1-7(2)11-9-6-4-3-5-8(9)10/h3-7,10H,1-2H3	InChI=1S/C9H12O2/c1-7(2)11-9-6-4-3-5-8(9)10/h3-7,10H,1-2H3	C9H12O2	152.084	136.241	134.677	134.467	Lite	0	0	0	0	0	0	0	0	0	0
DTXCID3021518	4-Methoxybenzeneethanol	702-23-8	COC1=CC=C(CCO)C=C1	InChI=1S/C9H12O2/c1-11-9-4-2-8(3-5-9)6-7-10/h2-5,10H,6-7H2,1H3	InChI=1S/C9H12O2/c1-11-9-4-2-8(3-5-9)6-7-10/h2-5,10H,6-7H2,1H3	C9H12O2	152.084	138.502	137.901	137.676	Lite	0	0	0	0	0	0	0	0	0	0
DTXCID404869	Cumene hydroperoxide	80-15-9	CC(C)(OO)C1=CC=CC=C1	InChI=1S/C9H12O2/c1-9(2,11-10)8-6-4-3-5-7-8/h3-7,10H,1-2H3	InChI=1S/C9H12O2/c1-9(2,11-10)8-6-4-3-5-7-8/h3-7,10H,1-2H3	C9H12O2	152.084	135.156	134.189	134.205	Lite	0	0	0	0	0	0	0	0	0	0
DTXCID407312	1-Phenoxy-2-propanol	770-35-4	CC(O)COC1=CC=CC=C1	InChI=1/C9H12O2/c1-8(10)7-11-9-5-3-2-4-6-9/h2-6,8,10H,7H2,1H3	InChI=1/C9H12O2/c1-8(10)7-11-9-5-3-2-4-6-9/h2-6,8,10H,7H2,1H3	C9H12O2	152.084	135.042	134.924	134.68	Lite	0	0	0	0	0	0	0	0	0	0
DTXCID8027038	4-Ethyl-2-methoxyphenol	2785-89-9	CCC1=CC(OC)=C(O)C=C1	InChI=1S/C9H12O2/c1-3-7-4-5-8(10)9(6-7)11-2/h4-6,10H,3H2,1-2H3	InChI=1S/C9H12O2/c1-3-7-4-5-8(10)9(6-7)11-2/h4-6,10H,3H2,1-2H3	C9H12O2	152.084	138.488	137.91	137.866	Lite	0	0	0	0	0	0	0	0	0	0
DTXCID9031018	2,3,5-Trimethylhydroquinone	700-13-0	CC1=C(O)C(C)=C(C)C(O)=C1	InChI=1S/C9H12O2/c1-5-4-8(10)6(2)7(3)9(5)11/h4,10-11H,1-3H3	InChI=1S/C9H12O2/c1-5-4-8(10)6(2)7(3)9(5)11/h4,10-11H,1-3H3	C9H12O2	152.084	139.231	135.42	135.058	Lite	0	0	0	0	0	0	0	0	0	0
DTXCID507502	2-Isopropyl-6-methyl-4-pyrimidone	2814-20-2	CC(C)C1=NC(=O)C=C(C)N1	InChI=1S/C8H12N2O/c1-5(2)8-9-6(3)4-7(11)10-8/h4-5H,1-3H3,(H,9,10,11)	InChI=1S/C8H12N2O/c1-5(2)8-9-6(3)4-7(11)10-8/h4-5H,1-3H3,(H,9,10,11)	C8H12N2O	152.095	138.478	147.438	137.711	Standard	0	0	0	0	0	0	1	0	0	0
DTXCID1031177	Piperitone	89-81-6	CC(C)C1CCC(C)=CC1=O	InChI=1S/C10H16O/c1-7(2)9-5-4-8(3)6-10(9)11/h6-7,9H,4-5H2,1-3H3_x000D_	InChI=1/C10H16O/c1-7(2)9-5-4-8(3)6-10(9)11/h6-7,9H,4-5H2,1-3H3	C10H16O	152.12	137.111	136.624	136.228	Lite	0	0	0	0	0	0	0	0	0	0
DTXCID3010955	D-Camphor	464-49-3	CC1(C)[C@@H]2CC[C@@]1(C)C(=O)C2	InChI=1S/C10H16O/c1-9(2)7-4-5-10(9,3)8(11)6-7/h7H,4-6H2,1-3H3/t7-,10+/m1/s1	InChI=1S/C10H16O/c1-9(2)7-4-5-10(9,3)8(11)6-7/h7H,4-6H2,1-3H3/t7-,10+/m1/s1	C10H16O	152.12	131.48	131.406	131.21	Lite	0	0	0	0	0	0	0	0	0	0
DTXCID3010955	(1S)-(-)-Camphor	464-48-2	CC1(C)[C@H]2CC[C@]1(C)C(=O)C2	InChI=1S/C10H16O/c1-9(2)7-4-5-10(9,3)8(11)6-7/h7H,4-6H2,1-3H3/t7-,10+/m0/s1	InChI=1S/C10H16O/c1-9(2)7-4-5-10(9,3)8(11)6-7/h7H,4-6H2,1-3H3/t7-,10+/m0/s1	C10H16O	152.12	131.72	131.699	131.338	Lite	0	0	0	0	0	0	0	0	0	0
DTXCID40209373	3,7-Dimethyl-2,6-octadienal	5392-40-5	CC(C)=CCCC(C)=CC=O	InChI=1S/C10H16O/c1-9(2)5-4-6-10(3)7-8-11/h5,7-8H,4,6H2,1-3H3	InChI=1S/C10H16O/c1-9(2)5-4-6-10(3)7-8-11/h5,7-8H,4,6H2,1-3H3	C10H16O	152.12	142.182	141.88	141.613	Lite	0	0	0	0	0	0	0	0	0	0
DTXCID4030336	alpha-Pinene oxide	1686-14-2	CC12OC1CC1CC2C1(C)C	InChI=1S/C10H16O/c1-9(2)6-4-7(9)10(3)8(5-6)11-10/h6-8H,4-5H2,1-3H3_x000D_	InChI=1/C10H16O/c1-9(2)6-4-7(9)10(3)8(5-6)11-10/h6-8H,4-5H2,1-3H3	C10H16O	152.12	132.29	132.523	132.08	Lite	0	0	0	0	0	0	0	0	0	0
DTXCID5027142	beta-Cyclocitral	432-25-7	CC1=C(C=O)C(C)(C)CCC1	InChI=1S/C10H16O/c1-8-5-4-6-10(2,3)9(8)7-11/h7H,4-6H2,1-3H3	InChI=1S/C10H16O/c1-8-5-4-6-10(2,3)9(8)7-11/h7H,4-6H2,1-3H3	C10H16O	152.12	136.081	135.543	135.467	Lite	0	0	0	0	0	0	0	0	0	0
DTXCID60209911	[(1R)-2,2,3-Trimethylcyclopent-3-en-1-yl]acetaldehyde	4501-58-0	CC1=CC[C@H](CC=O)C1(C)C	InChI=1S/C10H16O/c1-8-4-5-9(6-7-11)10(8,2)3/h4,7,9H,5-6H2,1-3H3/t9-/m1/s1	InChI=1S/C10H16O/c1-8-4-5-9(6-7-11)10(8,2)3/h4,7,9H,5-6H2,1-3H3/t9-/m1/s1	C10H16O	152.12	137.886	137.853	137.873	Lite	0	0	0	0	0	0	0	0	0	0
DTXCID809331	2-Pentyl-2-cyclopenten-1-one	25564-22-1	CCCCCC1=CCCC1=O	InChI=1S/C10H16O/c1-2-3-4-6-9-7-5-8-10(9)11/h7H,2-6,8H2,1H3	InChI=1S/C10H16O/c1-2-3-4-6-9-7-5-8-10(9)11/h7H,2-6,8H2,1H3	C10H16O	152.12	138.725	138.885	138.498	Lite	0	0	0	0	0	0	0	0	0	0
DTXCID90209404	(-)-alpha,beta-Thujone	76231-76-0	CC(C)[C@@]12C[C@@H]1C(C)C(=O)C2	InChI=1/C10H16O/c1-6(2)10-4-8(10)7(3)9(11)5-10/h6-8H,4-5H2,1-3H3/t7?,8-,10+/s2	InChI=1S/C10H16O/c1-6(2)10-4-8(10)7(3)9(11)5-10/h6-8H,4-5H2,1-3H3/t7?,8-,10+/m0/s1	C10H16O	152.12	136.841	136.915	136.679	Lite	0	0	0	0	0	0	0	0	0	0
DTXCID904911	(E,E)-2,4-Decadienal	25152-84-5	CCCCC\C=C\C=C\C=O	InChI=1S/C10H16O/c1-2-3-4-5-6-7-8-9-10-11/h6-10H,2-5H2,1H3/b7-6+,9-8+	InChI=1S/C10H16O/c1-2-3-4-5-6-7-8-9-10-11/h6-10H,2-5H2,1H3/b7-6+,9-8?	C10H16O	152.12	150.437	150.328	150.187	Lite	0	0	0	0	0	0	0	0	0	0
DTXCID5020732	4-Chlorophenyl isocyanate	104-12-1	ClC1=CC=C(C=C1)N=C=O	InChI=1S/C7H4ClNO/c8-6-1-3-7(4-2-6)9-5-10/h1-4H	InChI=1S/C7H4ClNO/c8-6-1-3-7(4-2-6)9-5-10/h1-4H	C7H4ClNO	152.998	124.029	124.119	123.679	Lite	0	0	0	0	0	0	0	0	0	0
DTXCID8027450	5-Chlorobenzotriazole	94-97-3	ClC1=CC2=C(NN=N2)C=C1	InChI=1S/C6H4ClN3/c7-4-1-2-5-6(3-4)9-10-8-5/h1-3H,(H,8,9,10)	InChI=1S/C6H4ClN3/c7-4-1-2-5-6(3-4)9-10-8-5/h1-3H,(H,8,9,10)	C6H4ClN3	153.009	119.425	118.862	118.328	Lite	0	0	0	0	0	0	0	1	0	0
DTXCID3023976	Fosamine ammonium	25954-13-6	[NH4+].CCOP([O-])(=O)C(N)=O	InChI=1S/C3H8NO4P.H3N/c1-2-8-9(6,7)3(4)5;/h2H2,1H3,(H2,4,5)(H,6,7);1H3	InChI=1/C3H8NO4P/c1-2-8-9(6,7)3(4)5/h2H2,1H3,(H2,4,5)(H,6,7)	C3H8NO4P	153.019	128.288	128.224	127.545	Lite	0	0	0	0	0	0	0	1	0	0
DTXCID5030870	4-Nitrobenzyl alcohol	619-73-8	OCC1=CC=C(C=C1)[N+]([O-])=O	InChI=1S/C7H7NO3/c9-5-6-1-3-7(4-2-6)8(10)11/h1-4,9H,5H2	InChI=1S/C7H7NO3/c9-5-6-1-3-7(4-2-6)8(10)11/h1-4,9H,5H2	C7H7NO3	153.043	135.122	134.419	134.209	Lite	0	0	0	0	0	0	0	0	0	0
DTXCID7048665	Salicylhydroxamic acid	89-73-6	ONC(=O)C1=C(O)C=CC=C1	InChI=1S/C7H7NO3/c9-6-4-2-1-3-5(6)7(10)8-11/h1-4,9,11H,(H,8,10)_x000D_	InChI=1S/C7H7NO3/c9-6-4-2-1-3-5(6)7(10)8-11/h1-4,9,11H,(H,8,10)	C7H7NO3	153.043	131.659	130.92	130.734	Lite	0	0	0	0	0	0	0	0	0	0
DTXCID70962	1-Methoxy-2-nitrobenzene	91-23-6	COC1=C(C=CC=C1)[N+]([O-])=O	InChI=1S/C7H7NO3/c1-11-7-5-3-2-4-6(7)8(9)10/h2-5H,1H3	InChI=1S/C7H7NO3/c1-11-7-5-3-2-4-6(7)8(9)10/h2-5H,1H3	C7H7NO3	153.043	132.143	131.651	131.397	Lite	0	0	0	0	0	0	0	1	0	0
DTXCID804506	5-Aminosalicylic acid	89-57-6	NC1=CC=C(O)C(=C1)C(O)=O	InChI=1S/C7H7NO3/c8-4-1-2-6(9)5(3-4)7(10)11/h1-3,9H,8H2,(H,10,11)	InChI=1S/C7H7NO3/c8-4-1-2-6(9)5(3-4)7(10)11/h1-3,9H,8H2,(H,10,11)	C7H7NO3	153.043	133.214	132.187	131.677	Lite	0	0	0	0	0	0	0	0	0	0
DTXCID00957	2-Nitro-1,4-phenylenediamine	5307-14-2	NC1=CC(=C(N)C=C1)[N+]([O-])=O	InChI=1S/C6H7N3O2/c7-4-1-2-5(8)6(3-4)9(10)11/h1-3H,7-8H2	InChI=1S/C6H7N3O2/c7-4-1-2-5(8)6(3-4)9(10)11/h1-3H,7-8H2	C6H7N3O2	153.054	132.459	132.538	131.325	Lite	0	0	0	0	0	0	0	0	0	0
DTXCID30958	4-Nitro-1,2-phenylenediamine	99-56-9	NC1=C(N)C=C(C=C1)[N+]([O-])=O	InChI=1S/C6H7N3O2/c7-5-2-1-4(9(10)11)3-6(5)8/h1-3H,7-8H2	InChI=1S/C6H7N3O2/c7-5-2-1-4(9(10)11)3-6(5)8/h1-3H,7-8H2	C6H7N3O2	153.054	133.391	132.394	132.471	Lite	0	0	0	0	0	0	1	0	0	0
DTXCID2024660	2,2'-Sulfanediyldiethanethiol	3570-55-6	SCCSCCS	InChI=1S/C4H10S3/c5-1-3-7-4-2-6/h5-6H,1-4H2	InChI=1S/C4H10S3/c5-1-3-7-4-2-6/h5-6H,1-4H2	C4H10S3	153.994			125.595	Lite	0	0	0	0	0	0	0	0	0	0
DTXCID1025019	Thimerosal	54-64-8	[Na+].CC[Hg]SC1=C(C=CC=C1)C([O-])=O	InChI=1S/C7H6O2S.C2H5.Hg.Na/c8-7(9)5-3-1-2-4-6(5)10;1-2;;/h1-4,10H,(H,8,9);1H2,2H3;;/q;;2*+1/p-2	InChI=1S/C7H6O2S/c8-7(9)5-3-1-2-4-6(5)10/h1-4,10H,(H,8,9)	C7H6O2S	154.009			128.504	Lite	0	0	0	0	0	1	0	0	0	0
DTXCID2024404	2-Hydroxyethyl disulfide	1892-29-1	OCCSSCCO	InChI=1S/C4H10O2S2/c5-1-3-7-8-4-2-6/h5-6H,1-4H2	InChI=1S/C4H10O2S2/c5-1-3-7-8-4-2-6/h5-6H,1-4H2	C4H10O2S2	154.012	128.151	129.269	126.403	Lite	0	0	0	0	0	0	0	0	0	0
DTXCID2031168	p-Toluoyl chloride	874-60-2	CC1=CC=C(C=C1)C(Cl)=O	InChI=1S/C8H7ClO/c1-6-2-4-7(5-3-6)8(9)10/h2-5H,1H3	InChI=1S/C8H7ClO/c1-6-2-4-7(5-3-6)8(9)10/h2-5H,1H3	C8H7ClO	154.018	126.516	125.966	125.812	Lite	0	0	0	0	0	0	0	0	0	0
DTXCID2031241	1-(4-Chlorophenyl)ethanone	99-91-2	CC(=O)C1=CC=C(Cl)C=C1	InChI=1S/C8H7ClO/c1-6(10)7-2-4-8(9)5-3-7/h2-5H,1H3_x000D_	InChI=1S/C8H7ClO/c1-6(10)7-2-4-8(9)5-3-7/h2-5H,1H3	C8H7ClO	154.018	125.108	124.845	124.544	Lite	0	0	0	0	0	0	0	0	0	0
DTXCID90293	2-Chloroacetophenone	532-27-4	ClCC(=O)C1=CC=CC=C1	InChI=1S/C8H7ClO/c9-6-8(10)7-4-2-1-3-5-7/h1-5H,6H2	InChI=1S/C8H7ClO/c9-6-8(10)7-4-2-1-3-5-7/h1-5H,6H2	C8H7ClO	154.018	125.268	124.576	124.412	Lite	0	0	0	0	0	0	0	0	0	0
DTXCID604045	Diethyl sulfate	64-67-5	CCOS(=O)(=O)OCC	InChI=1S/C4H10O4S/c1-3-7-9(5,6)8-4-2/h3-4H2,1-2H3	InChI=1S/C4H10O4S/c1-3-7-9(5,6)8-4-2/h3-4H2,1-2H3	C4H10O4S	154.03	130.882	130.449	130.063	Lite	0	0	0	0	0	0	0	0	0	0
DTXCID7024409	1,6-Dichlorohexane	2163-00-0	ClCCCCCCCl	InChI=1S/C6H12Cl2/c7-5-3-1-2-4-6-8/h1-6H2	InChI=1S/C6H12Cl2/c7-5-3-1-2-4-6-8/h1-6H2	C6H12Cl2	154.032			118.986	Lite	0	0	0	0	0	0	0	0	0	0
DTXCID0062	2-Amino-4-nitrophenol	99-57-0	NC1=C(O)C=CC(=C1)[N+]([O-])=O	InChI=1S/C6H6N2O3/c7-5-3-4(8(10)11)1-2-6(5)9/h1-3,9H,7H2	InChI=1S/C6H6N2O3/c7-5-3-4(8(10)11)1-2-6(5)9/h1-3,9H,7H2	C6H6N2O3	154.038	133.074	132.542	132.194	Lite	0	0	0	0	0	0	0	1	1	0
DTXCID2063	2-Amino-5-nitrophenol	121-88-0	NC1=C(O)C=C(C=C1)[N+]([O-])=O	InChI=1S/C6H6N2O3/c7-5-2-1-4(8(10)11)3-6(5)9/h1-3,9H,7H2	InChI=1S/C6H6N2O3/c7-5-2-1-4(8(10)11)3-6(5)9/h1-3,9H,7H2	C6H6N2O3	154.038	133.193	132.664	131.956	Lite	1	0	0	0	1	0	1	0	1	0
DTXCID4064	4-Amino-2-nitrophenol	119-34-6	NC1=CC(=C(O)C=C1)[N+]([O-])=O	InChI=1S/C6H6N2O3/c7-4-1-2-6(9)5(3-4)8(10)11/h1-3,9H,7H2	InChI=1S/C6H6N2O3/c7-4-1-2-6(9)5(3-4)8(10)11/h1-3,9H,7H2	C6H6N2O3	154.038	132.201	131.691	131.551	Lite	0	1	0	0	0	0	0	0	1	0
DTXCID9024699	Diethyl hydrogen phosphate	598-02-7	CCOP(O)(=O)OCC	InChI=1S/C4H11O4P/c1-3-7-9(5,6)8-4-2/h3-4H2,1-2H3,(H,5,6)_x000D_	InChI=1S/C4H11O4P/c1-3-7-9(5,6)8-4-2/h3-4H2,1-2H3,(H,5,6)	C4H11O4P	154.04			131.843	Lite	0	0	0	0	0	0	0	0	0	0
DTXCID3030559	3-Methyl-4-(methylthio)phenol	3120-74-9	CSC1=C(C)C=C(O)C=C1	InChI=1S/C8H10OS/c1-6-5-7(9)3-4-8(6)10-2/h3-5,9H,1-2H3	InChI=1S/C8H10OS/c1-6-5-7(9)3-4-8(6)10-2/h3-5,9H,1-2H3	C8H10OS	154.045	135.266	134.11	134.032	Lite	0	0	0	0	0	0	0	0	0	0
DTXCID9026974	2-Phenylmercaptoethanol	699-12-7	OCCSC1=CC=CC=C1	InChI=1S/C8H10OS/c9-6-7-10-8-4-2-1-3-5-8/h1-5,9H,6-7H2	InChI=1S/C8H10OS/c9-6-7-10-8-4-2-1-3-5-8/h1-5,9H,6-7H2	C8H10OS	154.045	132.137	132.19	132.169	Lite	0	0	0	0	0	0	0	0	0	0
DTXCID0031180	2,6-Dimethoxyphenol	91-10-1	COC1=CC=CC(OC)=C1O	InChI=1S/C8H10O3/c1-10-6-4-3-5-7(11-2)8(6)9/h3-5,9H,1-2H3	InChI=1S/C8H10O3/c1-10-6-4-3-5-7(11-2)8(6)9/h3-5,9H,1-2H3	C8H10O3	154.063	134.719	134.133	134.157	Lite	0	0	0	0	0	0	0	0	0	0
DTXCID205595	N,N'-Methylenebisacrylamide	110-26-9	C=CC(=O)NCNC(=O)C=C	InChI=1S/C7H10N2O2/c1-3-6(10)8-5-9-7(11)4-2/h3-4H,1-2,5H2,(H,8,10)(H,9,11)	InChI=1S/C7H10N2O2/c1-3-6(10)8-5-9-7(11)4-2/h3-4H,1-2,5H2,(H,8,10)(H,9,11)	C7H10N2O2	154.074	139.78	139.447	139.462	Lite	0	0	0	0	0	0	0	1	0	0
DTXCID201774	Acenaphthene	83-32-9	C1CC2=C3C1=CC=CC3=CC=C2	InChI=1S/C12H10/c1-3-9-4-2-6-11-8-7-10(5-1)12(9)11/h1-6H,7-8H2	InChI=1S/C12H10/c1-3-9-4-2-6-11-8-7-10(5-1)12(9)11/h1-6H,7-8H2	C12H10	154.078			132.407	Lite	0	0	0	0	0	0	0	0	0	0
DTXCID60161	Biphenyl	92-52-4	C1=CC=C(C=C1)C1=CC=CC=C1	InChI=1S/C12H10/c1-3-7-11(8-4-1)12-9-5-2-6-10-12/h1-10H	InChI=1S/C12H10/c1-3-7-11(8-4-1)12-9-5-2-6-10-12/h1-10H	C12H10	154.078			136.139	Lite	0	0	0	0	0	0	0	0	0	0
DTXCID7027093	Methyl 2-octynoate	111-12-6	CCCCCC#CC(=O)OC	InChI=1S/C9H14O2/c1-3-4-5-6-7-8-9(10)11-2/h3-6H2,1-2H3	InChI=1S/C9H14O2/c1-3-4-5-6-7-8-9(10)11-2/h3-6H2,1-2H3	C9H14O2	154.099	147.283	146.932	146.523	Lite	0	0	0	0	0	0	0	0	0	0
DTXCID00209894	(2R,5R)-5-Methyl-2-(propan-2-yl)cyclohexanone	491-07-6		InChI=1/C10H18O/c1-7(2)9-5-4-8(3)6-10(9)11/h7-9H,4-6H2,1-3H3/t8-,9-/s2	InChI=1S/C10H18O/c1-7(2)9-5-4-8(3)6-10(9)11/h7-9H,4-6H2,1-3H3/t8-,9-/m0/s1	C10H18O	154.136	137.574	136.966	136.861	Lite	0	0	0	0	0	0	0	0	0	0
DTXCID00209894	(2S,5R)-5-Methyl-2-(propan-2-yl)cyclohexanone	14073-97-3	CC(C)[C@@H]1CC[C@@H](C)CC1=O	InChI=1S/C10H18O/c1-7(2)9-5-4-8(3)6-10(9)11/h7-9H,4-6H2,1-3H3/t8-,9+/m1/s1	InChI=1S/C10H18O/c1-7(2)9-5-4-8(3)6-10(9)11/h7-9H,4-6H2,1-3H3/t8-,9+/m1/s1	C10H18O	154.136	138.403	138.551	138.344	Lite	0	0	0	0	0	0	0	0	0	0
DTXCID0030326	4-Methyl-2-(2-methylprop-1-en-1-yl)tetrahydro-2H-pyran	16409-43-1	CC1CCOC(C1)C=C(C)C	InChI=1/C10H18O/c1-8(2)6-10-7-9(3)4-5-11-10/h6,9-10H,4-5,7H2,1-3H3	InChI=1/C10H18O/c1-8(2)6-10-7-9(3)4-5-11-10/h6,9-10H,4-5,7H2,1-3H3	C10H18O	154.136	137.425	137.317	136.884	Lite	0	0	0	0	0	0	0	0	0	0
DTXCID1021790	(S)-(-)-Citronellal	5949-05-03	C[C@@H](CCC=C(C)C)CC=O	InChI=1S/C10H18O/c1-9(2)5-4-6-10(3)7-8-11/h5,8,10H,4,6-7H2,1-3H3/t10-/m0/s1	InChI=1S/C10H18O/c1-9(2)5-4-6-10(3)7-8-11/h5,8,10H,4,6-7H2,1-3H3/t10-/m0/s1	C10H18O	154.136	146.772	145.694	145.946	Lite	0	0	0	0	0	0	0	0	0	0
DTXCID1021790	Citronellal	106-23-0	CC(CCC=C(C)C)CC=O	InChI=1/C10H18O/c1-9(2)5-4-6-10(3)7-8-11/h5,8,10H,4,6-7H2,1-3H3	InChI=1/C10H18O/c1-9(2)5-4-6-10(3)7-8-11/h5,8,10H,4,6-7H2,1-3H3	C10H18O	154.136	146.505	145.619	145.743	Lite	0	0	0	0	0	0	0	0	0	0
DTXCID1024461	Isopulegol	89-79-2	C[C@@H]1CC[C@H]([C@@H](O)C1)C(C)=C	InChI=1S/C10H18O/c1-7(2)9-5-4-8(3)6-10(9)11/h8-11H,1,4-6H2,2-3H3/t8-,9+,10+/m1/s1	InChI=1S/C10H18O/c1-7(2)9-5-4-8(3)6-10(9)11/h8-11H,1,4-6H2,2-3H3/t8-,9+,10+/m1/s1	C10H18O	154.136	138.657	138.596	138.546	Lite	0	0	0	0	0	0	0	0	0	0
DTXCID1024461	5-Methyl-2-(prop-1-en-2-yl)cyclohexanol	7786-67-6	CC1CCC(C(O)C1)C(C)=C	InChI=1/C10H18O/c1-7(2)9-5-4-8(3)6-10(9)11/h8-11H,1,4-6H2,2-3H3	InChI=1/C10H18O/c1-7(2)9-5-4-8(3)6-10(9)11/h8-11H,1,4-6H2,2-3H3	C10H18O	154.136	138.029	137.857	137.857	Lite	0	0	0	0	0	0	0	0	0	0
DTXCID2021818	2-sec-Butylcyclohexanone	14765-30-1	CCC(C)C1CCCCC1=O	InChI=1/C10H18O/c1-3-8(2)9-6-4-5-7-10(9)11/h8-9H,3-7H2,1-2H3	InChI=1/C10H18O/c1-3-8(2)9-6-4-5-7-10(9)11/h8-9H,3-7H2,1-2H3	C10H18O	154.136	138.546	138.786	138.347	Lite	0	0	0	0	0	0	0	0	0	0
DTXCID2024824	4-Methyl-1-(propan-2-yl)cyclohex-3-en-1-ol	562-74-3	CC(C)C1(O)CCC(C)=CC1	InChI=1/C10H18O/c1-8(2)10(11)6-4-9(3)5-7-10/h4,8,11H,5-7H2,1-3H3	InChI=1/C10H18O/c1-8(2)10(11)6-4-9(3)5-7-10/h4,8,11H,5-7H2,1-3H3	C10H18O	154.136	137.402	137	136.888	Lite	0	0	0	0	0	0	0	0	0	0
DTXCID3027035	(2E)-2-Decenal	3913-81-3	CCCCCCC\C=C\C=O	InChI=1S/C10H18O/c1-2-3-4-5-6-7-8-9-10-11/h8-10H,2-7H2,1H3/b9-8+	InChI=1S/C10H18O/c1-2-3-4-5-6-7-8-9-10-11/h8-10H,2-7H2,1H3/b9-8+	C10H18O	154.136	149.253	148.788	148.572	Lite	0	0	0	0	0	0	0	0	0	0
DTXCID3027081	2-tert-Butylcyclohexanone	1728-46-7	CC(C)(C)C1CCCCC1=O	InChI=1/C10H18O/c1-10(2,3)8-6-4-5-7-9(8)11/h8H,4-7H2,1-3H3	InChI=1/C10H18O/c1-10(2,3)8-6-4-5-7-9(8)11/h8H,4-7H2,1-3H3	C10H18O	154.136	136.448	136.274	136.086	Lite	0	0	0	0	0	0	0	0	0	0
DTXCID305502	Linalool	78-70-6	CC(C)=CCCC(C)(O)C=C	InChI=1/C10H18O/c1-5-10(4,11)8-6-7-9(2)3/h5,7,11H,1,6,8H2,2-4H3	InChI=1/C10H18O/c1-5-10(4,11)8-6-7-9(2)3/h5,7,11H,1,6,8H2,2-4H3	C10H18O	154.136	143.723	143.268	143.156	Lite	0	0	0	0	0	0	0	0	0	0
DTXCID4030910	(4Z)-4-Decenal	21662-09-9	CCCCC\C=C/CCC=O	InChI=1S/C10H18O/c1-2-3-4-5-6-7-8-9-10-11/h6-7,10H,2-5,8-9H2,1H3/b7-6-	InChI=1S/C10H18O/c1-2-3-4-5-6-7-8-9-10-11/h6-7,10H,2-5,8-9H2,1H3/b7-6-	C10H18O	154.136	149.19	148.978	148.936	Lite	0	0	0	0	0	0	0	0	0	0
DTXCID406625	(L)-alpha-Terpineol	10482-56-1	CC1=CC[C@H](CC1)C(C)(C)O	InChI=1S/C10H18O/c1-8-4-6-9(7-5-8)10(2,3)11/h4,9,11H,5-7H2,1-3H3/t9-/m1/s1	InChI=1S/C10H18O/c1-8-4-6-9(7-5-8)10(2,3)11/h4,9,11H,5-7H2,1-3H3/t9-/m1/s1	C10H18O	154.136	137.307	136.839	136.827	Lite	0	0	0	0	0	0	0	0	0	0
DTXCID406625	alpha-Terpineol	98-55-5	CC1=CCC(CC1)C(C)(C)O	InChI=1/C10H18O/c1-8-4-6-9(7-5-8)10(2,3)11/h4,9,11H,5-7H2,1-3H3	InChI=1/C10H18O/c1-8-4-6-9(7-5-8)10(2,3)11/h4,9,11H,5-7H2,1-3H3	C10H18O	154.136	137.642	136.923	137.18	Lite	0	0	0	0	0	0	0	0	0	0
DTXCID406727	Geraniol	106-24-1	CC(C)=CCC\C(C)=C\CO	InChI=1S/C10H18O/c1-9(2)5-4-6-10(3)7-8-11/h5,7,11H,4,6,8H2,1-3H3/b10-7+	InChI=1S/C10H18O/c1-9(2)5-4-6-10(3)7-8-11/h5,7,11H,4,6,8H2,1-3H3/b10-7+	C10H18O	154.136	147.29	146.142	146.154	Lite	0	0	0	0	0	0	0	0	0	0
DTXCID5021209	beta-Terpineol	138-87-4	CC(=C)C1CCC(C)(O)CC1	InChI=1S/C10H18O/c1-8(2)9-4-6-10(3,11)7-5-9/h9,11H,1,4-7H2,2-3H3	InChI=1S/C10H18O/c1-8(2)9-4-6-10(3,11)7-5-9/h9,11H,1,4-7H2,2-3H3	C10H18O	154.136	139.655	138.826	138.507	Lite	0	0	0	0	0	0	0	0	0	0
DTXCID5024394	4-tert-Butylcyclohexanone	98-53-3	CC(C)(C)C1CCC(=O)CC1	InChI=1S/C10H18O/c1-10(2,3)8-4-6-9(11)7-5-8/h8H,4-7H2,1-3H3	InChI=1S/C10H18O/c1-10(2,3)8-4-6-9(11)7-5-8/h8H,4-7H2,1-3H3	C10H18O	154.136	137.745	137.788	137.363	Lite	0	0	0	0	0	0	0	0	0	0
DTXCID60616	1,8-Cineol	470-82-6	CC12CCC(CC1)C(C)(C)O2	InChI=1S/C10H18O/c1-9(2)8-4-6-10(3,11-9)7-5-8/h8H,4-7H2,1-3H3	InChI=1S/C10H18O/c1-9(2)8-4-6-10(3,11-9)7-5-8/h8H,4-7H2,1-3H3	C10H18O	154.136	133.4	133.321		Lite	0	0	0	0	0	0	0	0	0	0
DTXCID8028135	(+)-Borneol	464-43-7	CC1(C)[C@@H]2CC[C@@]1(C)[C@@H](O)C2	InChI=1S/C10H18O/c1-9(2)7-4-5-10(9,3)8(11)6-7/h7-8,11H,4-6H2,1-3H3/t7-,8+,10+/m1/s1_x000D_	InChI=1S/C10H18O/c1-9(2)7-4-5-10(9,3)8(11)6-7/h7-8,11H,4-6H2,1-3H3/t7-,8+,10+/m1/s1	C10H18O	154.136	133.013	132.251	132.243	Lite	0	0	0	0	0	0	0	0	0	0
DTXCID8028135	Isoborneol	124-76-5	CC1(C)[C@@H]2CC[C@@]1(C)[C@H](O)C2	InChI=1S/C10H18O/c1-9(2)7-4-5-10(9,3)8(11)6-7/h7-8,11H,4-6H2,1-3H3/t7-,8-,10+/m1/s1	InChI=1S/C10H18O/c1-9(2)7-4-5-10(9,3)8(11)6-7/h7-8,11H,4-6H2,1-3H3/t7-,8-,10+/m1/s1	C10H18O	154.136	131.829	131.917	131.675	Lite	0	0	0	0	0	0	0	0	0	0
DTXCID8028135	[(1S)-endo]-(-)-Borneol	464-45-9	CC1(C)[C@H]2CC[C@]1(C)[C@H](O)C2	InChI=1S/C10H18O/c1-9(2)7-4-5-10(9,3)8(11)6-7/h7-8,11H,4-6H2,1-3H3/t7-,8+,10+/m0/s1	InChI=1S/C10H18O/c1-9(2)7-4-5-10(9,3)8(11)6-7/h7-8,11H,4-6H2,1-3H3/t7-,8+,10+/m0/s1	C10H18O	154.136	132.67	132.235	132.248	Lite	0	0	0	0	0	0	0	0	0	0
DTXCID806728	(2Z)-3,7-Dimethylocta-2,6-dien-1-ol	106-25-2	CC(C)=CCC\C(C)=C/CO	InChI=1S/C10H18O/c1-9(2)5-4-6-10(3)7-8-11/h5,7,11H,4,6,8H2,1-3H3/b10-7-	InChI=1S/C10H18O/c1-9(2)5-4-6-10(3)7-8-11/h5,7,11H,4,6,8H2,1-3H3/b10-7-	C10H18O	154.136	141.29	141.101	141.133	Lite	0	0	0	0	0	0	0	0	0	0
DTXCID9021970	(1R)-endo-(+)-Fenchyl alcohol	2217-02-09	CC1(C)[C@H]2CC[C@](C)(C2)[C@H]1O	InChI=1S/C10H18O/c1-9(2)7-4-5-10(3,6-7)8(9)11/h7-8,11H,4-6H2,1-3H3/t7-,8-,10+/m0/s1	InChI=1S/C10H18O/c1-9(2)7-4-5-10(3,6-7)8(9)11/h7-8,11H,4-6H2,1-3H3/t7-,8-,10+/m0/s1	C10H18O	154.136	133.597	132.985	132.973	Lite	0	0	0	0	0	0	0	0	0	0
DTXCID9021970	Fenchol	1632-73-1	CC1(C)C2CCC(C)(C2)C1O	InChI=1/C10H18O/c1-9(2)7-4-5-10(3,6-7)8(9)11/h7-8,11H,4-6H2,1-3H3	InChI=1/C10H18O/c1-9(2)7-4-5-10(3,6-7)8(9)11/h7-8,11H,4-6H2,1-3H3	C10H18O	154.136	133.096	132.986	132.934	Lite	0	0	0	0	0	0	0	0	0	0
DTXCID9024697	4-Ethyloct-1-yn-3-ol	5877-42-9	CCCCC(CC)C(O)C#C	InChI=1/C10H18O/c1-4-7-8-9(5-2)10(11)6-3/h3,9-11H,4-5,7-8H2,1-2H3	InChI=1/C10H18O/c1-4-7-8-9(5-2)10(11)6-3/h3,9-11H,4-5,7-8H2,1-2H3	C10H18O	154.136	142.727	142.835	142.426	Lite	0	0	0	0	0	0	0	0	0	0
DTXCID7030850	2-Chlorobenzamide	609-66-5	NC(=O)C1=CC=CC=C1Cl	InChI=1S/C7H6ClNO/c8-6-4-2-1-3-5(6)7(9)10/h1-4H,(H2,9,10)	InChI=1S/C7H6ClNO/c8-6-4-2-1-3-5(6)7(9)10/h1-4H,(H2,9,10)	C7H6ClNO	155.014	124.302	123.968	123.755	Lite	0	0	0	0	0	0	0	0	0	0
DTXCID6027680	5-Acetyl-2,4-dimethylthiazole	38205-60-6	CC(=O)C1=C(C)N=C(C)S1	InChI=1S/C7H9NOS/c1-4-7(5(2)9)10-6(3)8-4/h1-3H3	InChI=1S/C7H9NOS/c1-4-7(5(2)9)10-6(3)8-4/h1-3H3	C7H9NOS	155.041	132.272	131.916	131.239	Lite	0	0	0	0	0	0	0	0	0	0
DTXCID7020714	2-Chloro-4,6-dimethylaniline	63133-82-4	CC1=CC(Cl)=C(N)C(C)=C1	InChI=1S/C8H10ClN/c1-5-3-6(2)8(10)7(9)4-5/h3-4H,10H2,1-2H3	InChI=1S/C8H10ClN/c1-5-3-6(2)8(10)7(9)4-5/h3-4H,10H2,1-2H3	C8H10ClN	155.05	127.663	126.764	126.823	Lite	0	0	0	0	0	0	0	0	0	0
DTXCID2021527	2,2,6,6-Tetramethyl-4-piperidone	826-36-8	CC1(C)CC(=O)CC(C)(C)N1	InChI=1S/C9H17NO/c1-8(2)5-7(11)6-9(3,4)10-8/h10H,5-6H2,1-4H3	InChI=1S/C9H17NO/c1-8(2)5-7(11)6-9(3,4)10-8/h10H,5-6H2,1-4H3	C9H17NO	155.131	135.455	135.259	135.131	Lite	0	0	0	0	0	0	0	0	0	0
DTXCID9024980	3-{[3-(Dimethylamino)propyl]amino}propanenitrile	69852-45-5	CN(C)CCCNCCC#N	InChI=1S/C8H17N3/c1-11(2)8-4-7-10-6-3-5-9/h10H,3-4,6-8H2,1-2H3	InChI=1S/C8H17N3/c1-11(2)8-4-7-10-6-3-5-9/h10H,3-4,6-8H2,1-2H3	C8H17N3	155.142	139.76	139.693	139.392	Lite	0	0	0	0	0	0	0	0	0	0
DTXCID801799	N,N-Diethylcyclohexylamine	91-65-6	CCN(CC)C1CCCCC1	InChI=1S/C10H21N/c1-3-11(4-2)10-8-6-5-7-9-10/h10H,3-9H2,1-2H3	InChI=1S/C10H21N/c1-3-11(4-2)10-8-6-5-7-9-10/h10H,3-9H2,1-2H3	C10H21N	155.167	139.035	138.675		Lite	0	0	0	0	0	0	0	0	0	0
DTXCID5028085	2,3-Dichloro-p-dioxane	3883-43-0	Cl[C@H]1OCCO[C@@H]1Cl	InChI=1S/C4H6Cl2O2/c5-3-4(6)8-2-1-7-3/h3-4H,1-2H2/t3-,4-/m0/s1	InChI=1S/C4H6Cl2O2/c5-3-4(6)8-2-1-7-3/h3-4H,1-2H2/t3-,4-/m0/s1	C4H6Cl2O2	155.975	110.052	109.722	109.403	Lite	0	0	0	0	0	0	0	0	0	0
DTXCID7024403	Phenyl carbonochloridate	1885-14-9	ClC(=O)OC1=CC=CC=C1	InChI=1S/C7H5ClO2/c8-7(9)10-6-4-2-1-3-5-6/h1-5H	InChI=1S/C7H5ClO2/c8-7(9)10-6-4-2-1-3-5-6/h1-5H	C7H5ClO2	155.998	122.385	125.098	124.733	Lite	0	0	0	0	0	0	0	0	0	0
DTXCID704772	4-Chlorobenzoic acid	74-11-3	OC(=O)C1=CC=C(Cl)C=C1	InChI=1S/C7H5ClO2/c8-6-3-1-5(2-4-6)7(9)10/h1-4H,(H,9,10)	InChI=1S/C7H5ClO2/c8-6-3-1-5(2-4-6)7(9)10/h1-4H,(H,9,10)	C7H5ClO2	155.998			122.739	Lite	0	0	0	0	0	0	1	0	0	0
DTXCID1024883	Butane-1-sulfonyl chloride	2386-60-9	CCCCS(Cl)(=O)=O	InChI=1S/C4H9ClO2S/c1-2-3-4-8(5,6)7/h2-4H2,1H3	InChI=1S/C4H9ClO2S/c1-2-3-4-8(5,6)7/h2-4H2,1H3	C4H9ClO2S	156.001	122.267	121.904	121.788	Lite	0	0	0	0	0	0	0	0	0	0
DTXCID3027661	S-Furfuryl thioacetate	13678-68-7	CC(=O)SCC1=CC=CO1	InChI=1S/C7H8O2S/c1-6(8)10-5-7-3-2-4-9-7/h2-4H,5H2,1H3	InChI=1S/C7H8O2S/c1-6(8)10-5-7-3-2-4-9-7/h2-4H,5H2,1H3	C7H8O2S	156.024	132.237	131.883	131.518	Lite	0	0	0	0	0	0	0	0	0	0
DTXCID6030609	4-Fluoro-3-nitroaniline	364-76-1	NC1=CC(=C(F)C=C1)[N+]([O-])=O	InChI=1S/C6H5FN2O2/c7-5-2-1-4(8)3-6(5)9(10)11/h1-3H,8H2	InChI=1S/C6H5FN2O2/c7-5-2-1-4(8)3-6(5)9(10)11/h1-3H,8H2	C6H5FN2O2	156.034	129.116	128.255	128.079	Lite	0	0	0	0	0	0	0	0	0	0
DTXCID4021507	4-Chloro-2-methylanisole	3260-85-3	COC1=CC=C(Cl)C=C1C	InChI=1S/C8H9ClO/c1-6-5-7(9)3-4-8(6)10-2/h3-5H,1-2H3	InChI=1S/C8H9ClO/c1-6-5-7(9)3-4-8(6)10-2/h3-5H,1-2H3	C8H9ClO	156.034	126.857	126.073	125.608	Lite	0	0	0	0	0	0	0	0	0	0
DTXCID6021404	2-Chloro-4,5-dimethylphenol	1124-04-5	CC1=CC(O)=C(Cl)C=C1C	InChI=1S/C8H9ClO/c1-5-3-7(9)8(10)4-6(5)2/h3-4,10H,1-2H3	InChI=1S/C8H9ClO/c1-5-3-7(9)8(10)4-6(5)2/h3-4,10H,1-2H3	C8H9ClO	156.034	127.149	126.462	126.238	Lite	0	0	0	0	0	0	0	0	0	0
DTXCID8012316	4-Chloro-3,5-dimethylphenol	88-04-0	CC1=CC(O)=CC(C)=C1Cl	InChI=1S/C8H9ClO/c1-5-3-7(10)4-6(2)8(5)9/h3-4,10H,1-2H3	InChI=1S/C8H9ClO/c1-5-3-7(10)4-6(2)8(5)9/h3-4,10H,1-2H3	C8H9ClO	156.034	128.632	127.827	127.827	Lite	0	0	0	0	0	1	0	0	0	0
DTXCID20509	5,5-Dimethylbarbituric acid	24448-94-0	CC1(C)C(=O)NC(=O)NC1=O	InChI=1S/C6H8N2O3/c1-6(2)3(9)7-5(11)8-4(6)10/h1-2H3,(H2,7,8,9,10,11)	InChI=1S/C6H8N2O3/c1-6(2)3(9)7-5(11)8-4(6)10/h1-2H3,(H2,7,8,9,10,11)	C6H8N2O3	156.054	132.479	132.177	131.627	Lite	0	0	0	0	0	0	1	0	0	0
DTXCID3027665	Furfuryl isopropyl sulfide	1883-78-9	CC(C)SCC1=CC=CO1	InChI=1S/C8H12OS/c1-7(2)10-6-8-4-3-5-9-8/h3-5,7H,6H2,1-2H3	InChI=1S/C8H12OS/c1-7(2)10-6-8-4-3-5-9-8/h3-5,7H,6H2,1-2H3	C8H12OS	156.061	133.306	145.285	135.084	Standard	0	0	0	0	0	0	0	0	0	0
DTXCID107200	4,4'-Bipyridine	553-26-4	C1=CC(=CC=N1)C1=CC=NC=C1	InChI=1S/C10H8N2/c1-5-11-6-2-9(1)10-3-7-12-8-4-10/h1-8H	InChI=1S/C10H8N2/c1-5-11-6-2-9(1)10-3-7-12-8-4-10/h1-8H	C10H8N2	156.069	135.413	135.005	134.468	Lite	0	0	0	0	0	0	0	1	0	0
DTXCID7020635	2,2'-Dipyridyl	366-18-7	C1=CC=C(N=C1)C1=CC=CC=N1	InChI=1S/C10H8N2/c1-3-7-11-9(5-1)10-6-2-4-8-12-10/h1-8H	InChI=1S/C10H8N2/c1-3-7-11-9(5-1)10-6-2-4-8-12-10/h1-8H	C10H8N2	156.069	135.669	135.546	134.713	Lite	0	0	0	0	0	0	0	0	0	0
DTXCID6024884	Tetrahydrofurfuryl acrylate	2399-48-6	C=CC(=O)OCC1CCCO1	InChI=1/C8H12O3/c1-2-8(9)11-6-7-4-3-5-10-7/h2,7H,1,3-6H2	InChI=1/C8H12O3/c1-2-8(9)11-6-7-4-3-5-10-7/h2,7H,1,3-6H2	C8H12O3	156.079	134.97	135.147	135.03	Lite	0	0	0	0	0	0	0	0	0	0
DTXCID309187	2,6-Dimethylnaphthalene	581-42-0	CC1=CC2=C(C=C1)C=C(C)C=C2	InChI=1S/C12H12/c1-9-3-5-12-8-10(2)4-6-11(12)7-9/h3-8H,1-2H3	InChI=1S/C12H12/c1-9-3-5-12-8-10(2)4-6-11(12)7-9/h3-8H,1-2H3	C12H12	156.094			139.043	Lite	0	0	0	0	0	0	0	0	0	0
DTXCID6015423	1,4-Dimethylnaphthalene	571-58-4	CC1=CC=C(C)C2=C1C=CC=C2	InChI=1S/C12H12/c1-9-7-8-10(2)12-6-4-3-5-11(9)12/h3-8H,1-2H3	InChI=1S/C12H12/c1-9-7-8-10(2)12-6-4-3-5-11(9)12/h3-8H,1-2H3	C12H12	156.094			136.497	Lite	0	0	0	0	0	0	0	0	0	0
DTXCID605130	1,2-Dimethylnapthalene	573-98-8	CC1=C(C)C2=CC=CC=C2C=C1	InChI=1S/C12H12/c1-9-7-8-11-5-3-4-6-12(11)10(9)2/h3-8H,1-2H3_x000D_	InChI=1S/C12H12/c1-9-7-8-11-5-3-4-6-12(11)10(9)2/h3-8H,1-2H3	C12H12	156.094			136.252	Lite	0	0	0	0	0	0	0	0	0	0
DTXCID0020735	1,7-Dioxaspiro[5.5]undecane	180-84-7	C1CCC2(CCCCO2)OC1	InChI=1S/C9H16O2/c1-3-7-10-9(5-1)6-2-4-8-11-9/h1-8H2	InChI=1S/C9H16O2/c1-3-7-10-9(5-1)6-2-4-8-11-9/h1-8H2	C9H16O2	156.115	133.293	133.109	132.783	Lite	0	0	0	0	0	0	0	0	0	0
DTXCID702194	Hexyl acrylate	2499-95-8	CCCCCCOC(=O)C=C	InChI=1S/C9H16O2/c1-3-5-6-7-8-11-9(10)4-2/h4H,2-3,5-8H2,1H3	InChI=1S/C9H16O2/c1-3-5-6-7-8-11-9(10)4-2/h4H,2-3,5-8H2,1H3	C9H16O2	156.115	142.659	142.481	142.211	Lite	0	0	0	0	0	0	0	0	0	0
DTXCID8014229	gamma-Nonanolactone	104-61-0	CCCCCC1CCC(=O)O1	InChI=1/C9H16O2/c1-2-3-4-5-8-6-7-9(10)11-8/h8H,2-7H2,1H3	InChI=1/C9H16O2/c1-2-3-4-5-8-6-7-9(10)11-8/h8H,2-7H2,1H3	C9H16O2	156.115	139.927	139.669	139.563	Lite	0	0	0	0	0	0	0	0	0	0
DTXCID80210246	(3Z)-Hex-3-en-1-yl propanoate	33467-74-2	CC\C=C/CCOC(=O)CC	InChI=1S/C9H16O2/c1-3-5-6-7-8-11-9(10)4-2/h5-6H,3-4,7-8H2,1-2H3/b6-5-	InChI=1S/C9H16O2/c1-3-5-6-7-8-11-9(10)4-2/h5-6H,3-4,7-8H2,1-2H3/b6-5-	C9H16O2	156.115	143.055	142.326	141.559	Lite	0	0	0	0	0	0	0	0	0	0
DTXCID002104	2-Decanone	693-54-9	CCCCCCCCC(C)=O	InChI=1S/C10H20O/c1-3-4-5-6-7-8-9-10(2)11/h3-9H2,1-2H3	InChI=1S/C10H20O/c1-3-4-5-6-7-8-9-10(2)11/h3-9H2,1-2H3	C10H20O	156.151	147.023	146.627	146.156	Lite	0	0	0	0	0	0	0	0	0	0
DTXCID006726	(S)-(-)-beta-Citronellol	7540-51-4	C[C@H](CCO)CCC=C(C)C	InChI=1S/C10H20O/c1-9(2)5-4-6-10(3)7-8-11/h5,10-11H,4,6-8H2,1-3H3/t10-/m0/s1	InChI=1S/C10H20O/c1-9(2)5-4-6-10(3)7-8-11/h5,10-11H,4,6-8H2,1-3H3/t10-/m0/s1	C10H20O	156.151	146.04	145.846	146.116	Lite	0	0	0	0	0	0	0	0	0	0
DTXCID006726	Citronellol	106-22-9	CC(CCO)CCC=C(C)C	InChI=1/C10H20O/c1-9(2)5-4-6-10(3)7-8-11/h5,10-11H,4,6-8H2,1-3H3	InChI=1/C10H20O/c1-9(2)5-4-6-10(3)7-8-11/h5,10-11H,4,6-8H2,1-3H3	C10H20O	156.151	146.469	146.097	146.071	Lite	0	0	0	0	0	0	0	0	0	0
DTXCID2021812	Dihydro-alpha-terpineol	498-81-7	CC1CCC(CC1)C(C)(C)O	InChI=1S/C10H20O/c1-8-4-6-9(7-5-8)10(2,3)11/h8-9,11H,4-7H2,1-3H3	InChI=1S/C10H20O/c1-8-4-6-9(7-5-8)10(2,3)11/h8-9,11H,4-7H2,1-3H3	C10H20O	156.151	137.537	137.267	137.307	Lite	0	0	0	0	0	0	0	0	0	0
DTXCID2024799	2-tert-Butylcyclohexanol	13491-79-7	CC(C)(C)C1CCCCC1O	InChI=1/C10H20O/c1-10(2,3)8-6-4-5-7-9(8)11/h8-9,11H,4-7H2,1-3H3	InChI=1/C10H20O/c1-10(2,3)8-6-4-5-7-9(8)11/h8-9,11H,4-7H2,1-3H3	C10H20O	156.151	137.77	137.092	137.381	Lite	0	0	0	0	0	0	0	0	0	0
DTXCID2024826	3,7-Dimethyloctanal	5988-91-0	CC(C)CCCC(C)CC=O	InChI=1/C10H20O/c1-9(2)5-4-6-10(3)7-8-11/h8-10H,4-7H2,1-3H3	InChI=1/C10H20O/c1-9(2)5-4-6-10(3)7-8-11/h8-10H,4-7H2,1-3H3	C10H20O	156.151	145.575	143.914	143.967	Lite	0	0	0	0	0	0	0	0	0	0
DTXCID30805	Menthol	1490-04-6	CC(C)C1CCC(C)CC1O	InChI=1/C10H20O/c1-7(2)9-5-4-8(3)6-10(9)11/h7-11H,4-6H2,1-3H3	InChI=1/C10H20O/c1-7(2)9-5-4-8(3)6-10(9)11/h7-11H,4-6H2,1-3H3	C10H20O	156.151	139.65	139.02	139.139	Lite	0	0	0	0	0	0	0	0	0	0
DTXCID30805	(1R,2S,5R)-(-)-Menthol	2216-51-5	CC(C)[C@@H]1CC[C@@H](C)C[C@H]1O	InChI=1S/C10H20O/c1-7(2)9-5-4-8(3)6-10(9)11/h7-11H,4-6H2,1-3H3/t8-,9+,10-/m1/s1	InChI=1S/C10H20O/c1-7(2)9-5-4-8(3)6-10(9)11/h7-11H,4-6H2,1-3H3/t8-,9+,10-/m1/s1	C10H20O	156.151	140.583	140.066	139.922	Lite	0	0	0	0	0	0	0	0	0	0
DTXCID4027656	9-Decen-1-ol	13019-22-2	OCCCCCCCCC=C	InChI=1S/C10H20O/c1-2-3-4-5-6-7-8-9-10-11/h2,11H,1,3-10H2	InChI=1S/C10H20O/c1-2-3-4-5-6-7-8-9-10-11/h2,11H,1,3-10H2	C10H20O	156.151	148.49	147.533	147.582	Lite	0	0	0	0	0	0	0	0	0	0
DTXCID4028179	4-Butylcyclohexanol	70568-60-4	CCCCC1CCC(O)CC1	InChI=1S/C10H20O/c1-2-3-4-9-5-7-10(11)8-6-9/h9-11H,2-8H2,1H3	InChI=1S/C10H20O/c1-2-3-4-9-5-7-10(11)8-6-9/h9-11H,2-8H2,1H3	C10H20O	156.151	139.127	138.942	138.869	Lite	0	0	0	0	0	0	0	0	0	0
DTXCID5015305	(E)-5-Decen-1-ol	56578-18-8	CCCC\C=C\CCCCO	InChI=1S/C10H20O/c1-2-3-4-5-6-7-8-9-10-11/h5-6,11H,2-4,7-10H2,1H3/b6-5+	InChI=1S/C10H20O/c1-2-3-4-5-6-7-8-9-10-11/h5-6,11H,2-4,7-10H2,1H3/b6-5+	C10H20O	156.151	150.871	150.223	149.839	Lite	0	0	0	0	0	0	0	0	0	0
DTXCID606623	4-tert-Butylcyclohexanol	98-52-2	CC(C)(C)C1CCC(O)CC1	InChI=1S/C10H20O/c1-10(2,3)8-4-6-9(11)7-5-8/h8-9,11H,4-7H2,1-3H3	InChI=1S/C10H20O/c1-10(2,3)8-4-6-9(11)7-5-8/h8-9,11H,4-7H2,1-3H3	C10H20O	156.151	138.687	138.121	138.15	Lite	0	0	0	0	0	0	0	0	0	0
DTXCID609317	1,1,5-Trimethyl-6-heptenol	18479-58-8	CC(CCCC(C)(C)O)C=C	InChI=1/C10H20O/c1-5-9(2)7-6-8-10(3,4)11/h5,9,11H,1,6-8H2,2-4H3	InChI=1/C10H20O/c1-5-9(2)7-6-8-10(3,4)11/h5,9,11H,1,6-8H2,2-4H3	C10H20O	156.151	143.359	143.064	142.919	Lite	0	0	0	0	0	0	0	0	0	0
DTXCID801553	Decanal	112-31-2	CCCCCCCCCC=O	InChI=1S/C10H20O/c1-2-3-4-5-6-7-8-9-10-11/h10H,2-9H2,1H3	InChI=1S/C10H20O/c1-2-3-4-5-6-7-8-9-10-11/h10H,2-9H2,1H3	C10H20O	156.151	146.571	145.4	145.045	Lite	0	0	0	0	0	0	0	0	0	0
DTXCID8032382	1-(n-Pentyl)cyclopentanol	194800-16-3	CCCCCC1(O)CCCC1	InChI=1S/C10H20O/c1-2-3-4-7-10(11)8-5-6-9-10/h11H,2-9H2,1H3_x000D_	InChI=1S/C10H20O/c1-2-3-4-7-10(11)8-5-6-9-10/h11H,2-9H2,1H3	C10H20O	156.151	140.096	139.64	139.568	Lite	0	0	0	0	0	0	0	0	0	0
DTXCID90210479	2,6-Dimethyloct-6-en-2-ol	30385-25-2	CC=C(C)CCCC(C)(C)O	InChI=1S/C10H20O/c1-5-9(2)7-6-8-10(3,4)11/h5,11H,6-8H2,1-4H3_x000D_	InChI=1S/C10H20O/c1-5-9(2)7-6-8-10(3,4)11/h5,11H,6-8H2,1-4H3	C10H20O	156.151	142.709	142.354	142.489	Lite	0	0	0	0	0	0	0	0	0	0
DTXCID9024809	3,7-Dimethyloct-6-en-3-ol	18479-51-1	CCC(C)(O)CCC=C(C)C	InChI=1/C10H20O/c1-5-10(4,11)8-6-7-9(2)3/h7,11H,5-6,8H2,1-4H3	InChI=1/C10H20O/c1-5-10(4,11)8-6-7-9(2)3/h7,11H,5-6,8H2,1-4H3	C10H20O	156.151	145.478	145.216	144.932	Lite	0	0	0	0	0	0	0	0	0	0
DTXCID9027233	Rhodinol	141-25-3	C[C@H](CCO)CCCC(C)=C	InChI=1S/C10H20O/c1-9(2)5-4-6-10(3)7-8-11/h10-11H,1,4-8H2,2-3H3/t10-/m0/s1	InChI=1S/C10H20O/c1-9(2)5-4-6-10(3)7-8-11/h10-11H,1,4-8H2,2-3H3/t10-/m0/s1	C10H20O	156.151	145.059	144.431	144.557	Lite	0	0	0	0	0	0	0	0	0	0
DTXCID1024388	2,2,6,6-Tetramethylpiperidin-4-amine	36768-62-4	CC1(C)CC(N)CC(C)(C)N1	InChI=1S/C9H20N2/c1-8(2)5-7(10)6-9(3,4)11-8/h7,11H,5-6,10H2,1-4H3	InChI=1S/C9H20N2/c1-8(2)5-7(10)6-9(3,4)11-8/h7,11H,5-6,10H2,1-4H3	C9H20N2	156.163	137.962	141.673	137.649	Standard	0	0	0	0	0	0	0	0	0	0
DTXCID301689	Undecane	1120-21-4	CCCCCCCCCCC	InChI=1S/C11H24/c1-3-5-7-9-11-10-8-6-4-2/h3-11H2,1-2H3	InChI=1S/C11H24/c1-3-5-7-9-11-10-8-6-4-2/h3-11H2,1-2H3	C11H24	156.188				NA	0	0	0	0	0	0	0	0	0	0
DTXCID0030116	2-Bromopyridine	109-04-6	BrC1=CC=CC=N1	InChI=1S/C5H4BrN/c6-5-3-1-2-4-7-5/h1-4H	InChI=1S/C5H4BrN/c6-5-3-1-2-4-7-5/h1-4H	C5H4BrN	156.953	108.482	108.102	107.247	Lite	0	0	0	0	0	0	0	0	0	0
DTXCID10281	1-Chloro-4-nitrobenzene	100-00-5	[O-][N+](=O)C1=CC=C(Cl)C=C1	InChI=1S/C6H4ClNO2/c7-5-1-3-6(4-2-5)8(9)10/h1-4H	InChI=1S/C6H4ClNO2/c7-5-1-3-6(4-2-5)8(9)10/h1-4H	C6H4ClNO2	156.993	123.014	122.339	121.988	Lite	0	0	0	0	0	0	0	0	0	0
DTXCID401971	1-Chloro-3-nitrobenzene	121-73-3	[O-][N+](=O)C1=CC=CC(Cl)=C1	InChI=1S/C6H4ClNO2/c7-5-2-1-3-6(4-5)8(9)10/h1-4H	InChI=1S/C6H4ClNO2/c7-5-2-1-3-6(4-5)8(9)10/h1-4H	C6H4ClNO2	156.993	123.22	122.361	122.2	Lite	0	0	0	0	0	0	0	0	0	0
DTXCID5020289	6-Chloro-2-picolinic acid	4684-94-0	OC(=O)C1=NC(Cl)=CC=C1	InChI=1S/C6H4ClNO2/c7-5-3-1-2-4(8-5)6(9)10/h1-3H,(H,9,10)	InChI=1S/C6H4ClNO2/c7-5-3-1-2-4(8-5)6(9)10/h1-3H,(H,9,10)	C6H4ClNO2	156.993	122.461	122.322	122.183	Lite	0	0	0	0	0	0	0	1	0	0
DTXCID80280	1-Chloro-2-nitrobenzene	88-73-3	[O-][N+](=O)C1=C(Cl)C=CC=C1	InChI=1S/C6H4ClNO2/c7-5-3-1-2-4-6(5)8(9)10/h1-4H	InChI=1S/C6H4ClNO2/c7-5-3-1-2-4-6(5)8(9)10/h1-4H	C6H4ClNO2	156.993	122.592	123.022	122.765	Lite	0	0	0	0	0	0	0	0	0	0
DTXCID0024848	N-(Isobutoxymethyl)acrylamide	16669-59-3	CC(C)COCNC(=O)C=C	InChI=1S/C8H15NO2/c1-4-8(10)9-6-11-5-7(2)3/h4,7H,1,5-6H2,2-3H3,(H,9,10)	InChI=1S/C8H15NO2/c1-4-8(10)9-6-11-5-7(2)3/h4,7H,1,5-6H2,2-3H3,(H,9,10)	C8H15NO2	157.11	142.987	142.51	142.352	Lite	0	0	0	1	0	0	0	0	0	1
DTXCID307504	2-(Dimethylamino)ethyl methacrylate	2867-47-2	CN(C)CCOC(=O)C(C)=C	InChI=1S/C8H15NO2/c1-7(2)8(10)11-6-5-9(3)4/h1,5-6H2,2-4H3	InChI=1S/C8H15NO2/c1-7(2)8(10)11-6-5-9(3)4/h1,5-6H2,2-4H3	C8H15NO2	157.11	138.556	139.419	139.537	Lite	0	0	0	0	0	0	0	0	0	0
DTXCID907443	N-(Butoxymethyl)acrylamide	1852-16-0	CCCCOCNC(=O)C=C	InChI=1S/C8H15NO2/c1-3-5-6-11-7-9-8(10)4-2/h4H,2-3,5-7H2,1H3,(H,9,10)	InChI=1S/C8H15NO2/c1-3-5-6-11-7-9-8(10)4-2/h4H,2-3,5-7H2,1H3,(H,9,10)	C8H15NO2	157.11	140.906	140.512	140.562	Lite	0	0	1	0	0	0	0	0	0	1
DTXCID0016299	N,N-Dimethyloctylamine	7378-99-6	CCCCCCCCN(C)C	InChI=1S/C10H23N/c1-4-5-6-7-8-9-10-11(2)3/h4-10H2,1-3H3	InChI=1S/C10H23N/c1-4-5-6-7-8-9-10-11(2)3/h4-10H2,1-3H3	C10H23N	157.183	148.211	147.909	148.17	Lite	0	0	0	0	0	0	0	0	0	0
DTXCID504931	N-pentylpentan-1-amine	2050-92-2	CCCCCNCCCCC	InChI=1S/C10H23N/c1-3-5-7-9-11-10-8-6-4-2/h11H,3-10H2,1-2H3	InChI=1S/C10H23N/c1-3-5-7-9-11-10-8-6-4-2/h11H,3-10H2,1-2H3	C10H23N	157.183	147.871	147.165	147.41	Lite	0	0	0	0	0	0	0	0	0	0
DTXCID902171	1-Decanamine	2016-57-1	CCCCCCCCCCN	InChI=1S/C10H23N/c1-2-3-4-5-6-7-8-9-10-11/h2-11H2,1H3	InChI=1S/C10H23N/c1-2-3-4-5-6-7-8-9-10-11/h2-11H2,1H3	C10H23N	157.183	149.497	148.672	148.738	Lite	0	0	0	0	0	0	0	0	0	0
DTXCID403973	4-Chlorophenyl methyl sulfide	123-09-1	CSC1=CC=C(Cl)C=C1	InChI=1S/C7H7ClS/c1-9-7-4-2-6(8)3-5-7/h2-5H,1H3	InChI=1S/C7H7ClS/c1-9-7-4-2-6(8)3-5-7/h2-5H,1H3	C7H7ClS	157.996			122.52	Lite	0	0	0	0	0	0	0	0	0	0
DTXCID404568	Benzenesulfonic acid	98-11-3	OS(=O)(=O)C1=CC=CC=C1	InChI=1S/C6H6O3S/c7-10(8,9)6-4-2-1-3-5-6/h1-5H,(H,7,8,9)	InChI=1S/C6H6O3S/c7-10(8,9)6-4-2-1-3-5-6/h1-5H,(H,7,8,9)	C6H6O3S	158.004			129.699	Lite	0	0	0	0	0	1	0	0	0	0
DTXCID0024399	Phenylphosphonic acid	1571-33-1	OP(O)(=O)C1=CC=CC=C1	InChI=1S/C6H7O3P/c7-10(8,9)6-4-2-1-3-5-6/h1-5H,(H2,7,8,9)	InChI=1S/C6H7O3P/c7-10(8,9)6-4-2-1-3-5-6/h1-5H,(H2,7,8,9)	C6H7O3P	158.013			131.058	Lite	0	0	0	0	0	0	0	0	0	0
DTXCID3020704	1,4-Naphthoquinone	130-15-4	O=C1C=CC(=O)C2=C1C=CC=C2	InChI=1S/C10H6O2/c11-9-5-6-10(12)8-4-2-1-3-7(8)9/h1-6H	InChI=1S/C10H6O2/c11-9-5-6-10(12)8-4-2-1-3-7(8)9/h1-6H	C10H6O2	158.037	133.469	132.995	132.822	Lite	0	0	0	0	0	0	0	0	0	0
DTXCID0043	Allantoin	97-59-6	NC(=O)NC1NC(=O)NC1=O	InChI=1/C4H6N4O3/c5-3(10)6-1-2(9)8-4(11)7-1/h1H,(H3,5,6,10)(H2,7,8,9,11)	InChI=1/C4H6N4O3/c5-3(10)6-1-2(9)8-4(11)7-1/h1H,(H3,5,6,10)(H2,7,8,9,11)	C4H6N4O3	158.044	135.058	134.635	133.683	Lite	0	0	0	0	0	0	0	0	0	0
DTXCID4015152	1-(Hydroxymethyl)-5,5-dimethylhydantoin	116-25-6	CC1(C)N(CO)C(=O)NC1=O	InChI=1S/C6H10N2O3/c1-6(2)4(10)7-5(11)8(6)3-9/h9H,3H2,1-2H3,(H,7,10,11)	InChI=1S/C6H10N2O3/c1-6(2)4(10)7-5(11)8(6)3-9/h9H,3H2,1-2H3,(H,7,10,11)	C6H10N2O3	158.069	133.126	132.55	132.492	Lite	0	0	0	0	0	0	0	0	0	0
DTXCID501022	N-Nitrosobis(2-oxopropyl)amine	60599-38-4	CC(=O)CN(CC(C)=O)N=O	InChI=1S/C6H10N2O3/c1-5(9)3-8(7-11)4-6(2)10/h3-4H2,1-2H3	InChI=1S/C6H10N2O3/c1-5(9)3-8(7-11)4-6(2)10/h3-4H2,1-2H3	C6H10N2O3	158.069	140.752	139.001	138.797	Lite	0	0	0	0	0	0	1	0	0	0
DTXCID5024392	2-Methoxynaphthalene	93-04-9	COC1=CC2=C(C=CC=C2)C=C1	InChI=1S/C11H10O/c1-12-11-7-6-9-4-2-3-5-10(9)8-11/h2-8H,1H3	InChI=1S/C11H10O/c1-12-11-7-6-9-4-2-3-5-10(9)8-11/h2-8H,1H3	C11H10O	158.073	137.817	137.004	136.908	Lite	0	0	0	0	0	0	0	0	0	0
DTXCID90916	1,5-Naphthalenediamine	2243-62-1	NC1=CC=CC2=C(N)C=CC=C12	InChI=1S/C10H10N2/c11-9-5-1-3-7-8(9)4-2-6-10(7)12/h1-6H,11-12H2	InChI=1S/C10H10N2/c11-9-5-1-3-7-8(9)4-2-6-10(7)12/h1-6H,11-12H2	C10H10N2	158.084	141.461	148.53	132.738	Standard	0	0	0	0	0	0	0	1	0	0
DTXCID0022149	Methyl 4,4,4-trimethylacetoacetate	55107-14-7	COC(=O)CC(=O)C(C)(C)C	InChI=1S/C8H14O3/c1-8(2,3)6(9)5-7(10)11-4/h5H2,1-4H3	InChI=1S/C8H14O3/c1-8(2,3)6(9)5-7(10)11-4/h5H2,1-4H3	C8H14O3	158.094	139.261	138.849	138.532	Lite	0	0	0	0	0	0	0	0	0	0
DTXCID2024402	tert-Butyl 3-oxobutanoate	1694-31-1	CC(=O)CC(=O)OC(C)(C)C	InChI=1S/C8H14O3/c1-6(9)5-7(10)11-8(2,3)4/h5H2,1-4H3	InChI=1S/C8H14O3/c1-6(9)5-7(10)11-8(2,3)4/h5,9H,1-4H3	C8H14O3	158.094	140.191	139.927	140.064	Lite	0	0	0	0	0	0	0	0	0	0
DTXCID4024985	{2-[2-(Ethenyloxy)ethoxy]ethoxy}ethene	764-99-8	C=COCCOCCOC=C	InChI=1S/C8H14O3/c1-3-9-5-7-11-8-6-10-4-2/h3-4H,1-2,5-8H2	InChI=1S/C8H14O3/c1-3-9-5-7-11-8-6-10-4-2/h3-4H,1-2,5-8H2	C8H14O3	158.094	138.607	138.249	138.311	Lite	0	0	0	0	0	0	0	0	0	0
DTXCID406609	Isobutyric anhydride	97-72-3	CC(C)C(=O)OC(=O)C(C)C	InChI=1S/C8H14O3/c1-5(2)7(9)11-8(10)6(3)4/h5-6H,1-4H3	InChI=1S/C8H14O3/c1-5(2)7(9)11-8(10)6(3)4/h5-6H,1-4H3	C8H14O3	158.094	141.867	141.171	141.292	Lite	0	0	0	0	0	0	0	0	0	0
DTXCID3024603	3-[Bis(2-hydroxyethyl)amino]propanenitrile	17209-72-2	OCCN(CCO)CCC#N	InChI=1S/C7H14N2O2/c8-2-1-3-9(4-6-10)5-7-11/h10-11H,1,3-7H2	InChI=1S/C7H14N2O2/c8-2-1-3-9(4-6-10)5-7-11/h10-11H,1,3-7H2	C7H14N2O2	158.106	138.005	137.963	139.127	Lite	0	0	0	0	0	0	0	0	0	0
DTXCID7027176	4-Phenyl-1-cyclohexene	4994-16-5	C1CC(CC=C1)C1=CC=CC=C1	InChI=1/C12H14/c1-3-7-11(8-4-1)12-9-5-2-6-10-12/h1-5,7-8,12H,6,9-10H2	InChI=1/C12H14/c1-3-7-11(8-4-1)12-9-5-2-6-10-12/h1-5,7-8,12H,6,9-10H2	C12H14	158.11			138.01	Lite	0	0	0	0	0	0	0	0	0	0
DTXCID1022059	Isopentyl butyrate	106-27-4	CCCC(=O)OCCC(C)C	InChI=1S/C9H18O2/c1-4-5-9(10)11-7-6-8(2)3/h8H,4-7H2,1-3H3	InChI=1S/C9H18O2/c1-4-5-9(10)11-7-6-8(2)3/h8H,4-7H2,1-3H3	C9H18O2	158.131	143.002	142.491	142.523	Lite	0	0	0	0	0	0	0	0	0	0
DTXCID2021604	Pentyl butyrate	540-18-1	CCCCCOC(=O)CCC	InChI=1S/C9H18O2/c1-3-5-6-8-11-9(10)7-4-2/h3-8H2,1-2H3	InChI=1S/C9H18O2/c1-3-5-6-8-11-9(10)7-4-2/h3-8H2,1-2H3	C9H18O2	158.131	144.591	144.596	142.488	Lite	0	0	0	0	0	0	0	0	0	0
DTXCID2027046	Butyl 2-methylbutyrate	15706-73-7	CCCCOC(=O)C(C)CC	InChI=1/C9H18O2/c1-4-6-7-11-9(10)8(3)5-2/h8H,4-7H2,1-3H3	InChI=1/C9H18O2/c1-4-6-7-11-9(10)8(3)5-2/h8H,4-7H2,1-3H3	C9H18O2	158.131	141.808	141.554	139.976	Lite	0	0	0	0	0	0	0	0	0	0
DTXCID3027582	Hexyl propanoate	2445-76-3	CCCCCCOC(=O)CC	InChI=1S/C9H18O2/c1-3-5-6-7-8-11-9(10)4-2/h3-8H2,1-2H3	InChI=1S/C9H18O2/c1-3-5-6-7-8-11-9(10)4-2/h3-8H2,1-2H3	C9H18O2	158.131	144.039	143.883	143.377	Lite	0	0	0	0	0	0	0	0	0	0
DTXCID4049088	4-Methoxymethylcyclohexanemethanol	98955-27-2	COCC1CCC(CO)CC1	InChI=1S/C9H18O2/c1-11-7-9-4-2-8(6-10)3-5-9/h8-10H,2-7H2,1H3	InChI=1S/C9H18O2/c1-11-7-9-4-2-8(6-10)3-5-9/h8-10H,2-7H2,1H3	C9H18O2	158.131	141.183	140.063	140.042	Lite	0	0	0	0	0	0	0	0	0	0
DTXCID606864	Methyl octanoate	111-11-5	CCCCCCCC(=O)OC	InChI=1S/C9H18O2/c1-3-4-5-6-7-8-9(10)11-2/h3-8H2,1-2H3	InChI=1S/C9H18O2/c1-3-4-5-6-7-8-9(10)11-2/h3-8H2,1-2H3	C9H18O2	158.131	145.532	145.027	144.753	Lite	0	0	0	0	0	0	0	0	0	0
DTXCID7027124	Heptyl acetate	112-06-1	CCCCCCCOC(C)=O	InChI=1S/C9H18O2/c1-3-4-5-6-7-8-11-9(2)10/h3-8H2,1-2H3	InChI=1S/C9H18O2/c1-3-4-5-6-7-8-11-9(2)10/h3-8H2,1-2H3	C9H18O2	158.131	143.784	143.569	143.976	Lite	0	0	0	0	0	0	0	0	0	0
DTXCID901641	Nonanoic acid	112-05-0	CCCCCCCCC(O)=O	InChI=1S/C9H18O2/c1-2-3-4-5-6-7-8-9(10)11/h2-8H2,1H3,(H,10,11)	InChI=1S/C9H18O2/c1-2-3-4-5-6-7-8-9(10)11/h2-8H2,1H3,(H,10,11)	C9H18O2	158.131			144.451	Lite	0	0	0	0	0	0	0	0	0	0
DTXCID9020112	Ethyl heptanoate	106-30-9	CCCCCCC(=O)OCC	InChI=1S/C9H18O2/c1-3-5-6-7-8-9(10)11-4-2/h3-8H2,1-2H3	InChI=1S/C9H18O2/c1-3-5-6-7-8-9(10)11-4-2/h3-8H2,1-2H3	C9H18O2	158.131	144.597	144.169	144.108	Lite	0	0	0	0	0	0	0	0	0	0
DTXCID101026	N-Nitrosodibutylamine	924-16-3	CCCCN(CCCC)N=O	InChI=1S/C8H18N2O/c1-3-5-7-10(9-11)8-6-4-2/h3-8H2,1-2H3	InChI=1S/C8H18N2O/c1-3-5-7-10(9-11)8-6-4-2/h3-8H2,1-2H3	C8H18N2O	158.142	144.088	142.774	142.811	Lite	0	0	0	0	0	0	0	0	0	0
DTXCID8024943	N,N-Dimethyl-2-(morpholin-4-yl)ethanamine	4385-05-01	CN(C)CCN1CCOCC1	InChI=1S/C8H18N2O/c1-9(2)3-4-10-5-7-11-8-6-10/h3-8H2,1-2H3	InChI=1S/C8H18N2O/c1-9(2)3-4-10-5-7-11-8-6-10/h3-8H2,1-2H3	C8H18N2O	158.142	139.436	138.988	138.597	Lite	0	0	0	0	0	0	0	0	0	0
DTXCID3024360	3,7-Dimethyloctan-1-ol	106-21-8	CC(C)CCCC(C)CCO	InChI=1/C10H22O/c1-9(2)5-4-6-10(3)7-8-11/h9-11H,4-8H2,1-3H3	InChI=1/C10H22O/c1-9(2)5-4-6-10(3)7-8-11/h9-11H,4-8H2,1-3H3	C10H22O	158.167	145.449	144.678	144.845	Lite	0	0	0	0	0	0	0	0	0	0
DTXCID3030769	Isoamyl ether	544-01-4	CC(C)CCOCCC(C)C	InChI=1S/C10H22O/c1-9(2)5-7-11-8-6-10(3)4/h9-10H,5-8H2,1-4H3	InChI=1S/C10H22O/c1-9(2)5-7-11-8-6-10(3)4/h9-10H,5-8H2,1-4H3	C10H22O	158.167	145.003	146.218	145.293	Lite	0	0	0	0	0	0	0	0	0	0
DTXCID309302	2-Propyl-1-heptanol	10042-59-8	CCCCCC(CO)CCC	InChI=1/C10H22O/c1-3-5-6-8-10(9-11)7-4-2/h10-11H,3-9H2,1-2H3	InChI=1/C10H22O/c1-3-5-6-8-10(9-11)7-4-2/h10-11H,3-9H2,1-2H3	C10H22O	158.167	144.887	144.714	144.776	Lite	0	0	0	0	0	0	0	0	0	0
DTXCID409110	3,7-Dimethyl-3-octanol	78-69-3	CCC(C)(O)CCCC(C)C	InChI=1/C10H22O/c1-5-10(4,11)8-6-7-9(2)3/h9,11H,5-8H2,1-4H3	InChI=1/C10H22O/c1-5-10(4,11)8-6-7-9(2)3/h9,11H,5-8H2,1-4H3	C10H22O	158.167	142.211	142.225	142.096	Lite	0	0	0	0	0	0	0	0	0	0
DTXCID501946	1-Decanol	112-30-1	CCCCCCCCCCO	InChI=1S/C10H22O/c1-2-3-4-5-6-7-8-9-10-11/h11H,2-10H2,1H3	InChI=1S/C10H22O/c1-2-3-4-5-6-7-8-9-10-11/h11H,2-10H2,1H3	C10H22O	158.167	148.202	148.828	148.967	Lite	0	0	0	0	0	0	0	0	0	0
DTXCID8024810	2,6-Dimethyloctan-2-ol	18479-57-7	CCC(C)CCCC(C)(C)O	InChI=1/C10H22O/c1-5-9(2)7-6-8-10(3,4)11/h9,11H,5-8H2,1-4H3	InChI=1/C10H22O/c1-5-9(2)7-6-8-10(3,4)11/h9,11H,5-8H2,1-4H3	C10H22O	158.167	145.029	144.69	144.361	Lite	0	0	0	0	0	0	0	0	0	0
DTXCID2026995	Ethyl 3-ethoxy-3-iminopropionate hydrochloride	2318-25-4	Cl.CCOC(=N)CC(=O)OCC	InChI=1S/C7H13NO3.ClH/c1-3-10-6(8)5-7(9)11-4-2;/h8H,3-5H2,1-2H3;1H	InChI=1S/C7H13NO3/c1-3-10-6(8)5-7(9)11-4-2/h8H,3-5H2,1-2H3	C7H13NO3	159.089	139.743	139.168	138.693	Lite	0	0	0	0	0	0	0	0	0	0
DTXCID903423	Pargyline hydrochloride	306-07-0	Cl.CN(CC#C)CC1=CC=CC=C1	InChI=1S/C11H13N.ClH/c1-3-9-12(2)10-11-7-5-4-6-8-11;/h1,4-8H,9-10H2,2H3;1H	InChI=1S/C11H13N/c1-3-9-12(2)10-11-7-5-4-6-8-11/h1,4-8H,9-10H2,2H3	C11H13N	159.105	144.649	149.714	142.472	Standard	0	0	0	0	0	0	0	1	0	0
DTXCID306430	Trichloroethenylsilane	75-94-5	Cl[Si](Cl)(Cl)C=C	InChI=1S/C2H3Cl3Si/c1-2-6(3,4)5/h2H,1H2_x000D_	InChI=1S/C2H3Cl3Si/c1-2-6(3,4)5/h2H,1H2	C2H3Cl3Si	159.907			90.7452	Lite	0	0	0	0	0	0	0	0	0	0
DTXCID1020697	2,6-Dichlorotoluene	118-69-4	CC1=C(Cl)C=CC=C1Cl	InChI=1S/C7H6Cl2/c1-5-6(8)3-2-4-7(5)9/h2-4H,1H3	InChI=1S/C7H6Cl2/c1-5-6(8)3-2-4-7(5)9/h2-4H,1H3	C7H6Cl2	159.985			115.146	Lite	0	0	0	0	0	0	0	0	0	0
DTXCID3020702	2,4-Dichlorotoluene	95-73-8	CC1=CC=C(Cl)C=C1Cl	InChI=1S/C7H6Cl2/c1-5-2-3-6(8)4-7(5)9/h2-4H,1H3	InChI=1S/C7H6Cl2/c1-5-2-3-6(8)4-7(5)9/h2-4H,1H3	C7H6Cl2	159.985			114.81	Lite	0	0	0	0	0	0	0	0	0	0
DTXCID405014	Benzal chloride	98-87-3	ClC(Cl)C1=CC=CC=C1	InChI=1S/C7H6Cl2/c8-7(9)6-4-2-1-3-5-6/h1-5,7H	InChI=1S/C7H6Cl2/c8-7(9)6-4-2-1-3-5-6/h1-5,7H	C7H6Cl2	159.985			114.997	Lite	0	0	0	0	0	0	0	0	0	0
DTXCID5030082	4-Chlorobenzyl chloride	104-83-6	ClCC1=CC=C(Cl)C=C1	InChI=1S/C7H6Cl2/c8-5-6-1-3-7(9)4-2-6/h1-4H,5H2_x000D_	InChI=1S/C7H6Cl2/c8-5-6-1-3-7(9)4-2-6/h1-4H,5H2	C7H6Cl2	159.985			114.615	Lite	0	0	0	0	0	0	0	0	0	0
DTXCID707241	2-Chlorobenzyl chloride	611-19-8	ClCC1=CC=CC=C1Cl	InChI=1S/C7H6Cl2/c8-5-6-3-1-2-4-7(6)9/h1-4H,5H2	InChI=1S/C7H6Cl2/c8-5-6-3-1-2-4-7(6)9/h1-4H,5H2	C7H6Cl2	159.985			114.83	Lite	0	0	0	0	0	0	0	0	0	0
DTXCID7027702	Methyl 2-methyl-3-furyl disulfide	65505-17-1	CSSC1=C(C)OC=C1	InChI=1S/C6H8OS2/c1-5-6(9-8-2)3-4-7-5/h3-4H,1-2H3	InChI=1S/C6H8OS2/c1-5-6(9-8-2)3-4-7-5/h3-4H,1-2H3	C6H8OS2	160.002	132.731	132.134	131.71	Lite	0	0	0	0	0	0	0	0	0	0
DTXCID705883	1,4-Diisocyanatobenzene	104-49-4	O=C=NC1=CC=C(C=C1)N=C=O	InChI=1S/C8H4N2O2/c11-5-9-7-1-2-8(4-3-7)10-6-12/h1-4H_x000D_	InChI=1S/C8H4N2O2/c11-5-9-7-1-2-8(4-3-7)10-6-12/h1-4H	C8H4N2O2	160.027	139.887	140.281	140.102	Lite	0	0	0	0	0	0	0	0	0	0
DTXCID0023903	2,3-Dihydroxynaphthalene	92-44-4	OC1=CC2=C(C=CC=C2)C=C1O	InChI=1S/C10H8O2/c11-9-5-7-3-1-2-4-8(7)6-10(9)12/h1-6,11-12H	InChI=1S/C10H8O2/c11-9-5-7-3-1-2-4-8(7)6-10(9)12/h1-6,11-12H	C10H8O2	160.052	135.111	134.791	134.656	Lite	0	0	0	0	0	0	0	0	0	0
DTXCID105588	6-Methyl coumarin	92-48-8	CC1=CC=C2OC(=O)C=CC2=C1	InChI=1S/C10H8O2/c1-7-2-4-9-8(6-7)3-5-10(11)12-9/h2-6H,1H3	InChI=1S/C10H8O2/c1-7-2-4-9-8(6-7)3-5-10(11)12-9/h2-6H,1H3	C10H8O2	160.052	136.007	135.179	134.981	Lite	0	0	0	0	0	0	0	1	0	0
DTXCID9031147	1,5-Dihydroxynaphthalene	83-56-7	OC1=CC=CC2=C(O)C=CC=C12	InChI=1S/C10H8O2/c11-9-5-1-3-7-8(9)4-2-6-10(7)12/h1-6,11-12H	InChI=1S/C10H8O2/c11-9-5-1-3-7-8(9)4-2-6-10(7)12/h1-6,11-12H	C10H8O2	160.052	135.123	134.253	133.238	Lite	0	0	0	0	0	0	0	0	0	0
DTXCID105122	Dimethyl glutarate	1119-40-0	COC(=O)CCCC(=O)OC	InChI=1S/C7H12O4/c1-10-6(8)4-3-5-7(9)11-2/h3-5H2,1-2H3	InChI=1S/C7H12O4/c1-10-6(8)4-3-5-7(9)11-2/h3-5H2,1-2H3	C7H12O4	160.074	139.218	139.482	139.526	Lite	0	0	0	0	0	0	0	0	0	0
DTXCID701863	Diethyl propanedioate	105-53-3	CCOC(=O)CC(=O)OCC	InChI=1S/C7H12O4/c1-3-10-6(8)5-7(9)11-4-2/h3-5H2,1-2H3	InChI=1S/C7H12O4/c1-3-10-6(8)5-7(9)11-4-2/h3-5H2,1-2H3	C7H12O4	160.074	139.836	138.849	139.006	Lite	0	0	0	0	0	0	0	0	0	0
DTXCID7024451	Methyl hexanedioate	627-91-8	COC(=O)CCCCC(O)=O	InChI=1S/C7H12O4/c1-11-7(10)5-3-2-4-6(8)9/h2-5H2,1H3,(H,8,9)	InChI=1S/C7H12O4/c1-11-7(10)5-3-2-4-6(8)9/h2-5H2,1H3,(H,8,9)	C7H12O4	160.074	139.667	139.843	139.043	Lite	0	0	0	0	0	0	0	0	0	0
DTXCID7024827	Propylene glycol diacetate	623-84-7	CC(COC(C)=O)OC(C)=O	InChI=1/C7H12O4/c1-5(11-7(3)9)4-10-6(2)8/h5H,4H2,1-3H3	InChI=1/C7H12O4/c1-5(11-7(3)9)4-10-6(2)8/h5H,4H2,1-3H3	C7H12O4	160.074	136.672	136.578	136.215	Lite	0	0	0	0	0	0	0	0	0	0
DTXCID703129	Hydralazine hydrochloride	304-20-1	Cl.NNC1=NN=CC2=CC=CC=C12	InChI=1S/C8H8N4.ClH/c9-11-8-7-4-2-1-3-6(7)5-10-12-8;/h1-5H,9H2,(H,11,12);1H	InChI=1S/C8H8N4/c9-11-8-7-4-2-1-3-6(7)5-10-12-8/h1-5H,9H2,(H,11,12)	C8H8N4	160.075	137.969	152.856	134.596	Standard	0	0	0	0	0	0	0	0	0	0
DTXCID70370	Daminozide	1596-84-5	CN(C)NC(=O)CCC(O)=O	InChI=1S/C6H12N2O3/c1-8(2)7-5(9)3-4-6(10)11/h3-4H2,1-2H3,(H,7,9)(H,10,11)	InChI=1S/C6H12N2O3/c1-8(2)7-5(9)3-4-6(10)11/h3-4H2,1-2H3,(H,7,9)(H,10,11)	C6H12N2O3	160.085	138.673	138.256	138.535	Lite	0	0	0	0	0	0	0	0	0	0
DTXCID9028176	Cyclobutyl phenyl ketone	5407-98-7	O=C(C1CCC1)C1=CC=CC=C1	InChI=1S/C11H12O/c12-11(10-7-4-8-10)9-5-2-1-3-6-9/h1-3,5-6,10H,4,7-8H2	InChI=1S/C11H12O/c12-11(10-7-4-8-10)9-5-2-1-3-6-9/h1-3,5-6,10H,4,7-8H2	C11H12O	160.089	138.246	137.768	137.288	Lite	0	0	0	0	0	0	0	0	0	0
DTXCID7027704	2-Methyl-4-propyl-1,3-oxathiane	67715-80-4	CCCC1CCOC(C)S1	InChI=1/C8H16OS/c1-3-4-8-5-6-9-7(2)10-8/h7-8H,3-6H2,1-2H3	InChI=1/C8H16OS/c1-3-4-8-5-6-9-7(2)10-8/h7-8H,3-6H2,1-2H3	C8H16OS	160.092	136.778	146.284	133.67	Standard	0	0	0	0	0	0	0	0	0	0
DTXCID006904	2-Butoxyethyl acetate	112-07-2	CCCCOCCOC(C)=O	InChI=1S/C8H16O3/c1-3-4-5-10-6-7-11-8(2)9/h3-7H2,1-2H3	InChI=1S/C8H16O3/c1-3-4-5-10-6-7-11-8(2)9/h3-7H2,1-2H3	C8H16O3	160.11	139.324	139.47	139.414	Lite	0	0	0	0	0	0	0	0	0	0
DTXCID0030669	4-Isopropylphenylacetaldehyde	4395-92-0	CC(C)C1=CC=C(CC=C)C=C1	InChI=1S/C12H16/c1-4-5-11-6-8-12(9-7-11)10(2)3/h4,6-10H,1,5H2,2-3H3_x000D_	InChI=1S/C12H16/c1-4-5-11-6-8-12(9-7-11)10(2)3/h4,6-10H,1,5H2,2-3H3	C12H16	160.125			146.312	Lite	0	0	0	0	0	0	0	0	0	0
DTXCID802305	4-tert-Butylstyrene	1746-23-2	CC(C)(C)C1=CC=C(C=C)C=C1	InChI=1S/C12H16/c1-5-10-6-8-11(9-7-10)12(2,3)4/h5-9H,1H2,2-4H3	InChI=1S/C12H16/c1-5-10-6-8-11(9-7-10)12(2,3)4/h5-9H,1H2,2-4H3	C12H16	160.125			143.236	Lite	0	0	0	0	0	0	0	0	0	0
DTXCID6021400	2-Butyl-2-ethyl-1,3-propanediol	115-84-4	CCCCC(CC)(CO)CO	InChI=1S/C9H20O2/c1-3-5-6-9(4-2,7-10)8-11/h10-11H,3-8H2,1-2H3	InChI=1S/C9H20O2/c1-3-5-6-9(4-2,7-10)8-11/h10-11H,3-8H2,1-2H3	C9H20O2	160.146	141.347	139.824	139.844	Lite	0	0	0	0	0	0	0	0	0	0
DTXCID807512	Bis[2-(dimethylamino)ethyl]ether	3033-62-3	CN(C)CCOCCN(C)C	InChI=1S/C8H20N2O/c1-9(2)5-7-11-8-6-10(3)4/h5-8H2,1-4H3	InChI=1S/C8H20N2O/c1-9(2)5-7-11-8-6-10(3)4/h5-8H2,1-4H3	C8H20N2O	160.158	142.24	142.339	141.226	Lite	0	0	0	0	0	0	0	0	0	0
DTXCID001815	3,4-Dichloroaniline	95-76-1	NC1=CC(Cl)=C(Cl)C=C1	InChI=1S/C6H5Cl2N/c7-5-2-1-4(9)3-6(5)8/h1-3H,9H2	InChI=1S/C6H5Cl2N/c7-5-2-1-4(9)3-6(5)8/h1-3H,9H2	C6H5Cl2N	160.98	114.705	113.794	113.475	Lite	0	0	0	0	1	0	0	0	0	1
DTXCID404966	2,4-Dichloroaniline	554-00-7	NC1=CC=C(Cl)C=C1Cl	InChI=1S/C6H5Cl2N/c7-4-1-2-6(9)5(8)3-4/h1-3H,9H2	InChI=1S/C6H5Cl2N/c7-4-1-2-6(9)5(8)3-4/h1-3H,9H2	C6H5Cl2N	160.98	114.903	113.693	113.722	Lite	0	0	0	0	0	0	0	0	0	0
DTXCID5010307	3,5-Dichloroaniline	626-43-7	NC1=CC(Cl)=CC(Cl)=C1	InChI=1S/C6H5Cl2N/c7-4-1-5(8)3-6(9)2-4/h1-3H,9H2	InChI=1S/C6H5Cl2N/c7-4-1-5(8)3-6(9)2-4/h1-3H,9H2	C6H5Cl2N	160.98	114.619	113.898	113.54	Lite	0	0	0	0	0	1	0	0	0	1
DTXCID504512	3-(Trifluoromethyl)aniline	98-16-8	NC1=CC(=CC=C1)C(F)(F)F	InChI=1S/C7H6F3N/c8-7(9,10)5-2-1-3-6(11)4-5/h1-4H,11H2	InChI=1S/C7H6F3N/c8-7(9,10)5-2-1-3-6(11)4-5/h1-4H,11H2	C7H6F3N	161.045	121.527	120.512	120.32	Lite	0	0	0	0	0	0	0	0	0	0
DTXCID807198	N-Methylphthalimide	550-44-7	CN1C(=O)C2=C(C=CC=C2)C1=O	InChI=1S/C9H7NO2/c1-10-8(11)6-4-2-3-5-7(6)9(10)12/h2-5H,1H3	InChI=1S/C9H7NO2/c1-10-8(11)6-4-2-3-5-7(6)9(10)12/h2-5H,1H3	C9H7NO2	161.048	135.008	134.562	134.202	Lite	1	0	0	0	1	0	1	0	0	0
DTXCID4021925	Ethiolate	2941-55-1	CCSC(=O)N(CC)CC	InChI=1S/C7H15NOS/c1-4-8(5-2)7(9)10-6-3/h4-6H2,1-3H3	InChI=1S/C7H15NOS/c1-4-8(5-2)7(9)10-6-3/h4-6H2,1-3H3	C7H15NOS	161.087			140.013	Lite	0	0	0	0	0	0	0	0	0	0
DTXCID2021234	1,3,6-Hexanetricarbonitrile	1772-25-4	N#CCCCC(CCC#N)C#N	InChI=1/C9H11N3/c10-6-2-1-4-9(8-12)5-3-7-11/h9H,1-5H2	InChI=1/C9H11N3/c10-6-2-1-4-9(8-12)5-3-7-11/h9H,1-5H2	C9H11N3	161.095			147.282	Lite	0	1	0	0	0	0	0	0	0	0
DTXCID805395	Hexamethyldisilazane	999-97-3	C[Si](C)(C)N[Si](C)(C)C	InChI=1S/C6H19NSi2/c1-8(2,3)7-9(4,5)6/h7H,1-6H3	InChI=1S/C6H19NSi2/c1-8(2,3)7-9(4,5)6/h7H,1-6H3	C6H19NSi2	161.106	122.708	122.587	122.438	Lite	0	0	0	0	0	0	0	0	0	0
DTXCID9024354	N-Butyldiethanolamine	102-79-4	CCCCN(CCO)CCO	InChI=1S/C8H19NO2/c1-2-3-4-9(5-7-10)6-8-11/h10-11H,2-8H2,1H3	InChI=1S/C8H19NO2/c1-2-3-4-9(5-7-10)6-8-11/h10-11H,2-8H2,1H3	C8H19NO2	161.142	138.832	138.42	139.775	Lite	0	0	0	0	0	0	0	0	0	0
DTXCID001378, DTXCID001378	Sodium trichloroacetate, Trichloroacetic acid	650-51-1, 76-03-9	[Na+].[O-]C(=O)C(Cl)(Cl)Cl	InChI=1S/C2HCl3O2.Na/c3-2(4,5)1(6)7;/h(H,6,7);/q;+1/p-1	InChI=1S/C2HCl3O2/c3-2(4,5)1(6)7/h(H,6,7)	C2HCl3O2	161.904			101.293	Lite	0	0	0	0	0	0	0	0	0	0
DTXCID207411	Dichloro(chloromethyl)methylsilane	1558-33-4	C[Si](Cl)(Cl)CCl	InChI=1S/C2H5Cl3Si/c1-6(4,5)2-3/h2H2,1H3_x000D_	InChI=1S/C2H5Cl3Si/c1-6(4,5)2-3/h2H2,1H3	C2H5Cl3Si	161.923			95.1639	Lite	0	0	0	0	0	0	0	0	0	0
DTXCID307407	Ethyl dichlorophosphate	1498-51-7	CCOP(Cl)(Cl)=O	InChI=1S/C2H5Cl2O2P/c1-2-6-7(3,4)5/h2H2,1H3	InChI=1S/C2H5Cl2O2P/c1-2-6-7(3,4)5/h2H2,1H3	C2H5Cl2O2P	161.94	114.607	114.482	113.865	Lite	0	0	0	0	0	0	0	0	0	0
DTXCID70439	2,4-Dichlorophenol	120-83-2	OC1=C(Cl)C=C(Cl)C=C1	InChI=1S/C6H4Cl2O/c7-4-1-2-6(9)5(8)3-4/h1-3,9H	InChI=1S/C6H4Cl2O/c7-4-1-2-6(9)5(8)3-4/h1-3,9H	C6H4Cl2O	161.964	114.239	113.71	113.402	Lite	0	0	0	0	0	0	1	0	0	1
DTXCID705003	2,5-Dichlorophenol	583-78-8	OC1=CC(Cl)=CC=C1Cl	InChI=1S/C6H4Cl2O/c7-4-1-2-5(8)6(9)3-4/h1-3,9H	InChI=1S/C6H4Cl2O/c7-4-1-2-5(8)6(9)3-4/h1-3,9H	C6H4Cl2O	161.964	114.013	113.734	113.347	Lite	0	0	0	0	0	0	0	1	0	1
DTXCID004902	Dazomet	533-74-4	CN1CSC(=S)N(C)C1	InChI=1S/C5H10N2S2/c1-6-3-7(2)5(8)9-4-6/h3-4H2,1-2H3	InChI=1S/C5H10N2S2/c1-6-3-7(2)5(8)9-4-6/h3-4H2,1-2H3	C5H10N2S2	162.029	129.36	128.561	128.24	Lite	0	1	0	0	0	0	0	0	0	1
DTXCID8031231	3-(Trifluoromethyl)phenol	98-17-9	OC1=CC(=CC=C1)C(F)(F)F	InChI=1S/C7H5F3O/c8-7(9,10)5-2-1-3-6(11)4-5/h1-4,11H_x000D_	InChI=1S/C7H5F3O/c8-7(9,10)5-2-1-3-6(11)4-5/h1-4,11H	C7H5F3O	162.029	120.878	120.26	120.213	Lite	0	0	0	0	0	0	0	0	0	0
DTXCID307805	4-Methylphthalic anhydride	19438-61-0	CC1=CC2=C(C=C1)C(=O)OC2=O	InChI=1S/C9H6O3/c1-5-2-3-6-7(4-5)9(11)12-8(6)10/h2-4H,1H3	InChI=1S/C9H6O3/c1-5-2-3-6-7(4-5)9(11)12-8(6)10/h2-4H,1H3	C9H6O3	162.032	136.198	136.027	135.66	Lite	0	0	1	0	0	0	0	0	0	0
DTXCID9031199	Umbelliferone	93-35-6	OC1=CC=C2C=CC(=O)OC2=C1	InChI=1S/C9H6O3/c10-7-3-1-6-2-4-9(11)12-8(6)5-7/h1-5,10H_x000D_	InChI=1S/C9H6O3/c10-7-3-1-6-2-4-9(11)12-8(6)5-7/h1-5,10H	C9H6O3	162.032	134.121	133.516	133.319	Lite	0	0	0	0	0	0	0	0	0	0
DTXCID40810024	Methomyl	16752-77-5	CNC(=O)ON=C(C)SC	InChI=1S/C5H10N2O2S/c1-4(10-3)7-9-5(8)6-2/h1-3H3,(H,6,8)/b7-4-	InChI=1S/C5H10N2O2S/c1-4(10-3)7-9-5(8)6-2/h1-3H3,(H,6,8)	C5H10N2O2S	162.046	137.692	137.48	137.191	Lite	0	0	0	0	1	0	0	0	0	0
DTXCID1030319	Diethyl dicarbonate	1609-47-8	CCOC(=O)OC(=O)OCC	InChI=1S/C6H10O5/c1-3-9-5(7)11-6(8)10-4-2/h3-4H2,1-2H3	InChI=1S/C6H10O5/c1-3-9-5(7)11-6(8)10-4-2/h3-4H2,1-2H3	C6H10O5	162.053	142.194	141.288	140.669	Lite	0	0	0	0	0	0	0	0	0	0
DTXCID0024898	4-Ethenylphenyl acetate	2628-16-2	CC(=O)OC1=CC=C(C=C)C=C1	InChI=1S/C10H10O2/c1-3-9-4-6-10(7-5-9)12-8(2)11/h3-7H,1H2,2H3	InChI=1S/C10H10O2/c1-3-9-4-6-10(7-5-9)12-8(2)11/h3-7H,1H2,2H3	C10H10O2	162.068	142.82	142.09	141.54	Lite	0	0	0	0	0	0	0	0	0	0
DTXCID10911653, DTXCID10911653	Methyl (E)-cinnamate, Methyl cinnamate	1754-62-7, 103-26-4	COC(=O)\C=C\C1=CC=CC=C1	InChI=1S/C10H10O2/c1-12-10(11)8-7-9-5-3-2-4-6-9/h2-8H,1H3/b8-7+	InChI=1S/C10H10O2/c1-12-10(11)8-7-9-5-3-2-4-6-9/h2-8H,1H3	C10H10O2	162.068	144.07	143.51	143.45	Lite	0	0	0	0	0	0	0	0	0	0
DTXCID20911482	Isosafrole	120-58-1	CC=CC1=CC2=C(OCO2)C=C1	InChI=1S/C10H10O2/c1-2-3-8-4-5-9-10(6-8)12-7-11-9/h2-6H,7H2,1H3	InChI=1S/C10H10O2/c1-2-3-8-4-5-9-10(6-8)12-7-11-9/h2-6H,7H2,1H3	C10H10O2	162.068	140.57	140.51	140.08	Lite	0	0	0	0	0	0	0	0	0	0
DTXCID405551	trans-2-Methoxycinnamaldehyde	60125-24-8	COC1=CC=CC=C1\C=C\C=O	InChI=1S/C10H10O2/c1-12-10-7-3-2-5-9(10)6-4-8-11/h2-8H,1H3/b6-4+	InChI=1S/C10H10O2/c1-12-10-7-3-2-5-9(10)6-4-8-11/h2-8H,1H3	C10H10O2	162.068	142.43	141.99	141.83	Lite	0	0	0	0	0	1	0	0	0	0
DTXCID601254	Safrole	94-59-7	C=CCC1=CC=C2OCOC2=C1	InChI=1S/C10H10O2/c1-2-3-8-4-5-9-10(6-8)12-7-11-9/h2,4-6H,1,3,7H2	InChI=1S/C10H10O2/c1-2-3-8-4-5-9-10(6-8)12-7-11-9/h2,4-6H,1,3,7H2	C10H10O2	162.068	139.91	139.65	139.53	Lite	0	0	0	0	0	0	0	0	0	0
DTXCID5024845	Butyl 3-mercaptopropionate	16215-21-7	CCCCOC(=O)CCS	InChI=1S/C7H14O2S/c1-2-3-5-9-7(8)4-6-10/h10H,2-6H2,1H3	InChI=1S/C7H14O2S/c1-2-3-5-9-7(8)4-6-10/h10H,2-6H2,1H3	C7H14O2S	162.071	137.755	137.393	137.439	Lite	0	0	0	0	0	0	0	0	0	0
DTXCID507308	2-Ethylhexanoyl chloride	760-67-8	CCCCC(CC)C(Cl)=O	InChI=1/C8H15ClO/c1-3-5-6-7(4-2)8(9)10/h7H,3-6H2,1-2H3	InChI=1/C8H15ClO/c1-3-5-6-7(4-2)8(9)10/h7H,3-6H2,1-2H3	C8H15ClO	162.081	133.104	152.023	138.298	Standard	0	0	0	0	0	0	0	0	0	0
DTXCID406769	Hexamethyldisiloxane	107-46-0	C[Si](C)(C)O[Si](C)(C)C	InChI=1S/C6H18OSi2/c1-8(2,3)7-9(4,5)6/h1-6H3	InChI=1S/C6H18OSi2/c1-8(2,3)7-9(4,5)6/h1-6H3	C6H18OSi2	162.09	122.22	122.215		Lite	0	0	0	0	0	0	0	0	0	0
DTXCID3028184	tert-Butyl phenyl ketone	938-16-9	CC(C)(C)C(=O)C1=CC=CC=C1	InChI=1S/C11H14O/c1-11(2,3)10(12)9-7-5-4-6-8-9/h4-8H,1-3H3	InChI=1S/C11H14O/c1-11(2,3)10(12)9-7-5-4-6-8-9/h4-8H,1-3H3	C11H14O	162.105	141.107	140.545	140.099	Lite	0	0	0	0	0	0	0	0	0	0
DTXCID50202491	L-3-(2'-Piperidyl)pyridine	494-52-0	C1CC[C@H](NC1)C1=CC=CN=C1	InChI=1S/C10H14N2/c1-2-7-12-10(5-1)9-4-3-6-11-8-9/h3-4,6,8,10,12H,1-2,5,7H2/t10-/m0/s1	InChI=1S/C10H14N2/c1-2-7-12-10(5-1)9-4-3-6-11-8-9/h3-4,6,8,10,12H,1-2,5,7H2/t10-/m0/s1	C10H14N2	162.116	137.391	136.707	136.394	Lite	0	0	0	0	0	0	0	0	0	0
DTXCID9017696	N'-(2,4-Dimethylphenyl)-N-methylformamidine	33089-74-6	CNC=NC1=CC=C(C)C=C1C	InChI=1S/C10H14N2/c1-8-4-5-10(9(2)6-8)12-7-11-3/h4-7H,1-3H3,(H,11,12)	InChI=1S/C10H14N2/c1-8-4-5-10(9(2)6-8)12-7-11-3/h4-7H,1-3H3,(H,11,12)	C10H14N2	162.116	145.12	144.294	144.6	Lite	0	0	0	0	0	0	0	0	0	0
DTXCID9028128, DTXCID9028128	Nicotine sulfate, Nicotine	65-30-5, 54-11-5	OS(O)(=O)=O.CN1CCC[C@H]1C1=CN=CC=C1.CN1CCC[C@H]1C1=CN=CC=C1	InChI=1S/2C10H14N2.H2O4S/c2*1-12-7-3-5-10(12)9-4-2-6-11-8-9;1-5(2,3)4/h2*2,4,6,8,10H,3,5,7H2,1H3;(H2,1,2,3,4)/t2*10-;/m00./s1	InChI=1S/C10H14N2/c1-12-7-3-5-10(12)9-4-2-6-11-8-9/h2,4,6,8,10H,3,5,7H2,1H3/t10-/m0/s1	C10H14N2	162.116	138.488	137.724	137.583	Lite	0	0	0	0	0	0	0	0	0	0
DTXCID001519	2-(2-Butoxyethoxy)ethanol	112-34-5	CCCCOCCOCCO	InChI=1S/C8H18O3/c1-2-3-5-10-7-8-11-6-4-9/h9H,2-8H2,1H3	InChI=1S/C8H18O3/c1-2-3-5-10-7-8-11-6-4-9/h9H,2-8H2,1H3	C8H18O3	162.126	141.663	141.297	141.279	Lite	0	0	0	0	0	0	0	0	0	0
DTXCID505047	Diethylene glycol diethyl ether	112-36-7	CCOCCOCCOCC	InChI=1S/C8H18O3/c1-3-9-5-7-11-8-6-10-4-2/h3-8H2,1-2H3	InChI=1S/C8H18O3/c1-3-9-5-7-11-8-6-10-4-2/h3-8H2,1-2H3	C8H18O3	162.126	143.682	143.738	143.89	Lite	0	0	0	0	0	0	0	0	0	0
DTXCID0024680	2,2'-[(3-Aminopropyl)imino]diethanol	4985-85-7	NCCCN(CCO)CCO	InChI=1S/C7H18N2O2/c8-2-1-3-9(4-6-10)5-7-11/h10-11H,1-8H2	InChI=1S/C7H18N2O2/c8-2-1-3-9(4-6-10)5-7-11/h10-11H,1-8H2	C7H18N2O2	162.137	138.832	138.651	140.59	Lite	0	0	0	0	0	0	0	0	0	0
DTXCID40209434	trans,trans,cis-1,5,9-Cyclododecatriene	706-31-0	C1C\C=C\CC\C=C/CC\C=C\1	InChI=1S/C12H18/c1-2-4-6-8-10-12-11-9-7-5-3-1/h1-2,7-10H,3-6,11-12H2/b2-1-,9-7+,10-8+	InChI=1S/C12H18/c1-2-4-6-8-10-12-11-9-7-5-3-1/h1-2,7-10H,3-6,11-12H2/b2-1-,9-7+,10-8+	C12H18	162.141				NA	0	0	0	0	0	0	0	0	0	0
DTXCID006640	1,3-Diisopropylbenzene	99-62-7	CC(C)C1=CC(=CC=C1)C(C)C	InChI=1S/C12H18/c1-9(2)11-6-5-7-12(8-11)10(3)4/h5-10H,1-4H3	InChI=1S/C12H18/c1-9(2)11-6-5-7-12(8-11)10(3)4/h5-10H,1-4H3	C12H18	162.141			145.948	Lite	0	0	0	0	0	0	0	0	0	0
DTXCID106652	1,4-Diisopropylbenzene	100-18-5	CC(C)C1=CC=C(C=C1)C(C)C	InChI=1S/C12H18/c1-9(2)11-5-7-12(8-6-11)10(3)4/h5-10H,1-4H3	InChI=1S/C12H18/c1-9(2)11-5-7-12(8-6-11)10(3)4/h5-10H,1-4H3	C12H18	162.141			146.305	Lite	0	0	0	0	0	0	0	0	0	0
DTXCID2021492	3-Phenylhexane	4468-42-2	CCCC(CC)C1=CC=CC=C1	InChI=1/C12H18/c1-3-8-11(4-2)12-9-6-5-7-10-12/h5-7,9-11H,3-4,8H2,1-2H3	InChI=1/C12H18/c1-3-8-11(4-2)12-9-6-5-7-10-12/h5-7,9-11H,3-4,8H2,1-2H3	C12H18	162.141			144.54	Lite	0	0	0	0	0	0	0	0	0	0
DTXCID3031232	5-Tert-butyl-m-xylene	98-19-1	CC1=CC(=CC(C)=C1)C(C)(C)C	InChI=1S/C12H18/c1-9-6-10(2)8-11(7-9)12(3,4)5/h6-8H,1-5H3_x000D_	InChI=1S/C12H18/c1-9-6-10(2)8-11(7-9)12(3,4)5/h6-8H,1-5H3	C12H18	162.141			145.145	Lite	0	0	0	0	0	0	0	0	0	0
DTXCID30911559	1-Propene, tetramer	6842-15-5	C\C=C\C\C=C\C\C=C\CC=C	InChI=1S/C12H18/c1-3-5-7-9-11-12-10-8-6-4-2/h3-4,6-7,9-10,12H,1,5,8,11H2,2H3/b6-4+,9-7+,12-10+	InChI=1S/C12H18/c1-3-5-7-9-11-12-10-8-6-4-2/h3-4,6-7,9-10,12H,1,5,8,11H2,2H3/b6-4+,9-7+,12-10+	C12H18	162.141			160.393	Lite	0	0	0	0	0	0	0	0	0	0
DTXCID40209434	trans,trans,trans-1,5,9-Cyclododecatriene	676-22-2	C1C\C=C\CC\C=C\CC\C=C\1	InChI=1S/C12H18/c1-2-4-6-8-10-12-11-9-7-5-3-1/h1-2,7-10H,3-6,11-12H2/b2-1+,9-7+,10-8+_x000D_	InChI=1S/C12H18/c1-2-4-6-8-10-12-11-9-7-5-3-1/h1-2,7-10H,3-6,11-12H2/b2-1+,9-7+,10-8+	C12H18	162.141				NA	0	0	0	0	0	0	0	0	0	0
DTXCID40209434	1,5,9-Cyclododecatriene	4904-61-4	C1CC=CCCC=CCCC=C1	InChI=1S/C12H18/c1-2-4-6-8-10-12-11-9-7-5-3-1/h1-2,7-10H,3-6,11-12H2	InChI=1S/C12H18/c1-2-4-6-8-10-12-11-9-7-5-3-1/h1-2,7-10H,3-6,11-12H2	C12H18	162.141				NA	0	0	0	0	0	0	0	0	0	0
DTXCID00315	Chloropicrin	76-06-2	[O-][N+](=O)C(Cl)(Cl)Cl	InChI=1S/CCl3NO2/c2-1(3,4)5(6)7	InChI=1S/CCl3NO2/c2-1(3,4)5(6)7	CCl3NO2	162.899	101.388	101.36		Lite	0	0	0	0	0	0	0	0	0	0
DTXCID8030768	3,5-Dichloro-2-pyridone	5437-33-2	ClC1C=C(Cl)C=NC1=O	InChI=1S/C5H3Cl2NO/c6-3-1-4(7)5(9)8-2-3/h1-2,4H_x000D_	InChI=1S/C5H3Cl2NO/c6-3-1-4(7)5(9)8-2-3/h1-2H,(H,8,9)	C5H3Cl2NO	162.959	113.487	112.907	112.837	Lite	0	0	0	0	0	0	0	0	0	0
DTXCID0027983	Acesulfame potassium	55589-62-3	[K+].CC1=CC(=O)[N-]S(=O)(=O)O1	InChI=1S/C4H5NO4S.K/c1-3-2-4(6)5-10(7,8)9-3;/h2H,1H3,(H,5,6);/q;+1/p-1	InChI=1S/C4H5NO4S/c1-3-2-4(6)5-10(7,8)9-3/h2H,1H3,(H,5,6)	C4H5NO4S	162.994	131.805	130.908	130.729	Lite	0	0	0	1	0	0	0	0	0	0
DTXCID906955	2H-3,1-Benzoxazine-2,4(1H)-dione	118-48-9	O=C1NC2=C(C=CC=C2)C(=O)O1	InChI=1S/C8H5NO3/c10-7-5-3-1-2-4-6(5)9-8(11)12-7/h1-4H,(H,9,11)	InChI=1S/C8H5NO3/c10-7-5-3-1-2-4-6(5)9-8(11)12-7/h1-4H,(H,9,11)	C8H5NO3	163.027	132.562	132.226	131.952	Lite	1	0	0	0	1	0	1	0	0	1
DTXCID60965	6-Nitrobenzimidazole	94-52-0	[O-][N+](=O)C1=CC2=C(NC=N2)C=C1	InChI=1S/C7H5N3O2/c11-10(12)5-1-2-6-7(3-5)9-4-8-6/h1-4H,(H,8,9)	InChI=1S/C7H5N3O2/c11-10(12)5-1-2-6-7(3-5)9-4-8-6/h1-4H,(H,8,9)	C7H5N3O2	163.038	142.375	134.028	133.565	Standard	0	0	1	0	0	0	0	0	0	1
DTXCID8018839	2-Amino-5-nitrobenzonitrile	17420-30-3	NC1=C(C=C(C=C1)[N+]([O-])=O)C#N	InChI=1S/C7H5N3O2/c8-4-5-3-6(10(11)12)1-2-7(5)9/h1-3H,9H2	InChI=1S/C7H5N3O2/c8-4-5-3-6(10(11)12)1-2-7(5)9/h1-3H,9H2	C7H5N3O2	163.038	149.409	138.015	131.961	Standard	0	0	0	0	0	0	0	0	0	0
DTXCID9024489	2-Chloro-N,N-dimethyl-3-oxobutanamide	5810-11-07	CN(C)C(=O)C(Cl)C(C)=O	InChI=1/C6H10ClNO2/c1-4(9)5(7)6(10)8(2)3/h5H,1-3H3	InChI=1/C6H10ClNO2/c1-4(9)5(7)6(10)8(2)3/h5H,1-3H3	C6H10ClNO2	163.04	130.201	130.044	130.11	Lite	0	0	0	1	0	0	0	0	0	1
DTXCID9021188	(2-Nitro-1-propenyl)benzene	705-60-2	CC(=CC1=CC=CC=C1)[N+]([O-])=O	InChI=1S/C9H9NO2/c1-8(10(11)12)7-9-5-3-2-4-6-9/h2-7H,1H3	InChI=1S/C9H9NO2/c1-8(10(11)12)7-9-5-3-2-4-6-9/h2-7H,1H3	C9H9NO2	163.063	133.19	129.154	128.242	Lite	0	0	0	0	0	0	0	0	0	0
DTXCID0024715	2,2-Dimethyl-2,3-dihydro-1-benzofuran-7-amine	68298-46-4	CC1(C)CC2=C(O1)C(N)=CC=C2	InChI=1S/C10H13NO/c1-10(2)6-7-4-3-5-8(11)9(7)12-10/h3-5H,6,11H2,1-2H3	InChI=1S/C10H13NO/c1-10(2)6-7-4-3-5-8(11)9(7)12-10/h3-5H,6,11H2,1-2H3	C10H13NO	163.1	137.651	145.701	136.1	Standard	0	0	0	0	1	0	0	0	0	1
DTXCID8024868	N-(2,4-Dimethylphenyl)acetamide	2050-43-3	CC(=O)NC1=CC=C(C)C=C1C	InChI=1S/C10H13NO/c1-7-4-5-10(8(2)6-7)11-9(3)12/h4-6H,1-3H3,(H,11,12)	InChI=1S/C10H13NO/c1-7-4-5-10(8(2)6-7)11-9(3)12/h4-6H,1-3H3,(H,11,12)	C10H13NO	163.1	140.527	153.934	135.917	Standard	0	0	0	0	0	1	0	0	0	1
DTXCID5031183	N,N-Diethyl-m-toluidine	91-67-8	CCN(CC)C1=CC=CC(C)=C1	InChI=1S/C11H17N/c1-4-12(5-2)11-8-6-7-10(3)9-11/h6-9H,4-5H2,1-3H3	InChI=1S/C11H17N/c1-4-12(5-2)11-8-6-7-10(3)9-11/h6-9H,4-5H2,1-3H3	C11H17N	163.136	144.669	144.652	144.501	Lite	0	0	0	0	0	0	0	0	0	0
DTXCID8020707	4-Pentylaniline	33228-44-3	CCCCCC1=CC=C(N)C=C1	InChI=1S/C11H17N/c1-2-3-4-5-10-6-8-11(12)9-7-10/h6-9H,2-5,12H2,1H3	InChI=1S/C11H17N/c1-2-3-4-5-10-6-8-11(12)9-7-10/h6-9H,2-5,12H2,1H3	C11H17N	163.136	146.514	145.427	145.289	Lite	0	0	0	0	0	0	0	1	0	0
DTXCID2024454	Ethyl 4-chloro-3-oxobutanoate	638-07-3	CCOC(=O)CC(=O)CCl	InChI=1S/C6H9ClO3/c1-2-10-6(9)3-5(8)4-7/h2-4H2,1H3	InChI=1S/C6H9ClO3/c1-2-10-6(9)3-5(8)4-7/h2-4H2,1H3	C6H9ClO3	164.024	128.953	129.323	128.947	Lite	0	0	0	0	0	0	0	0	0	0
DTXCID70100743	1-Methyl-1,3-dihydro-2H-benzimidazole-2-thione	2360-22-7	CN1C(=S)NC2=CC=CC=C12	InChI=1S/C8H8N2S/c1-10-7-5-3-2-4-6(7)9-8(10)11/h2-5H,1H3,(H,9,11)_x000D_	InChI=1S/C8H8N2S/c1-10-7-5-3-2-4-6(7)9-8(10)11/h2-5H,1H3,(H,9,11)	C8H8N2S	164.041	133.436	133.027	132.379	Lite	0	0	0	0	0	0	0	0	0	0
DTXCID005610	Methyl 4-formylbenzoate	1571-08-0	COC(=O)C1=CC=C(C=O)C=C1	InChI=1S/C9H8O3/c1-12-9(11)8-4-2-7(6-10)3-5-8/h2-6H,1H3	InChI=1S/C9H8O3/c1-12-9(11)8-4-2-7(6-10)3-5-8/h2-6H,1H3	C9H8O3	164.047	140.53	140.111	140.146	Lite	0	0	0	0	0	0	0	0	0	0
DTXCID8027456	2-Norbornene-5,6-dicarboxylic anhydride	826-62-0	O=C1OC(=O)C2C3CC(C=C3)C12	InChI=1/C9H8O3/c10-8-6-4-1-2-5(3-4)7(6)9(11)12-8/h1-2,4-7H,3H2	InChI=1/C9H8O3/c10-8-6-4-1-2-5(3-4)7(6)9(11)12-8/h1-2,4-7H,3H2	C9H8O3	164.047	132.128	131.839	131.362	Lite	0	0	0	0	0	1	0	0	0	0
DTXCID9022281	Phenylpyruvic acid	156-06-9	OC(=O)C(=O)CC1=CC=CC=C1	InChI=1S/C9H8O3/c10-8(9(11)12)6-7-4-2-1-3-5-7/h1-5H,6H2,(H,11,12)	InChI=1S/C9H8O3/c10-8(9(11)12)6-7-4-2-1-3-5-7/h1-5H,6H2,(H,11,12)	C9H8O3	164.047	139.493	139.351	139.369	Lite	0	0	0	0	0	0	0	0	0	0
DTXCID3030509	1,4-Dimethyl-2,6-dioxo-1,2,5,6-tetrahydropyridine-3-carbonitrile	27074-03-9	CN1C(=O)CC(C)=C(C#N)C1=O	InChI=1S/C8H8N2O2/c1-5-3-7(11)10(2)8(12)6(5)4-9/h3H2,1-2H3_x000D_	InChI=1S/C8H8N2O2/c1-5-3-7(11)10(2)8(12)6(5)4-9/h3H2,1-2H3	C8H8N2O2	164.059	138.824	138.259	138.158	Lite	0	0	0	0	0	0	0	0	0	0
DTXCID50122903	Ricinine	524-40-3	COC1=C(C#N)C(=O)N(C)C=C1	InChI=1S/C8H8N2O2/c1-10-4-3-7(12-2)6(5-9)8(10)11/h3-4H,1-2H3_x000D_	InChI=1S/C8H8N2O2/c1-10-4-3-7(12-2)6(5-9)8(10)11/h3-4H,1-2H3	C8H8N2O2	164.059	138.512	137.764	137.381	Lite	0	0	0	0	0	0	0	0	0	0
DTXCID30197957	(E)-Isoeugenol	5932-68-3	COC1=CC(\C=C\C)=CC=C1O	InChI=1S/C10H12O2/c1-3-4-8-5-6-9(11)10(7-8)12-2/h3-7,11H,1-2H3/b4-3+	InChI=1S/C10H12O2/c1-3-4-8-5-6-9(11)10(7-8)12-2/h3-7,11H,1-2H3/b4-3+	C10H12O2	164.084	145.746	144.274	144.39	Lite	0	0	0	0	0	0	0	0	0	0
DTXCID2020711	Ethyl 2-methylbenzoate	87-24-1	CCOC(=O)C1=C(C)C=CC=C1	InChI=1S/C10H12O2/c1-3-12-10(11)9-7-5-4-6-8(9)2/h4-7H,3H2,1-2H3	InChI=1S/C10H12O2/c1-3-12-10(11)9-7-5-4-6-8(9)2/h4-7H,3H2,1-2H3	C10H12O2	164.084	139.08	138.531	138.587	Lite	0	0	0	0	0	0	0	0	0	0
DTXCID2024791	Benzyl propanoate	122-63-4	CCC(=O)OCC1=CC=CC=C1	InChI=1S/C10H12O2/c1-2-10(11)12-8-9-6-4-3-5-7-9/h3-7H,2,8H2,1H3	InChI=1S/C10H12O2/c1-2-10(11)12-8-9-6-4-3-5-7-9/h3-7H,2,8H2,1H3	C10H12O2	164.084	140.518	140.188	140.317	Lite	0	0	0	0	0	0	0	0	0	0
DTXCID2024878	Propyl benzoate	2315-68-6	CCCOC(=O)C1=CC=CC=C1	InChI=1S/C10H12O2/c1-2-8-12-10(11)9-6-4-3-5-7-9/h3-7H,2,8H2,1H3	InChI=1S/C10H12O2/c1-2-8-12-10(11)9-6-4-3-5-7-9/h3-7H,2,8H2,1H3	C10H12O2	164.084	138.844	138.49	138.778	Lite	0	0	0	0	0	0	0	0	0	0
DTXCID30197957	Isoeugenol	97-54-1	COC1=CC(C=CC)=CC=C1O	InChI=1S/C10H12O2/c1-3-4-8-5-6-9(11)10(7-8)12-2/h3-7,11H,1-2H3	InChI=1S/C10H12O2/c1-3-4-8-5-6-9(11)10(7-8)12-2/h3-7,11H,1-2H3	C10H12O2	164.084	145.009	144.671	144.125	Lite	0	0	0	0	0	0	0	0	0	0
DTXCID3024495	4-(4-Hydroxyphenyl)butan-2-one	5471-51-2	CC(=O)CCC1=CC=C(O)C=C1	InChI=1S/C10H12O2/c1-8(11)2-3-9-4-6-10(12)7-5-9/h4-7,12H,2-3H2,1H3	InChI=1S/C10H12O2/c1-8(11)2-3-9-4-6-10(12)7-5-9/h4-7,12H,2-3H2,1H3	C10H12O2	164.084	142.104	141.249	141.472	Lite	0	0	1	0	0	0	0	0	0	1
DTXCID3028186	Ethyl 4-methylbenzoate	94-08-6	CCOC(=O)C1=CC=C(C)C=C1	InChI=1S/C10H12O2/c1-3-12-10(11)9-6-4-8(2)5-7-9/h4-7H,3H2,1-2H3	InChI=1S/C10H12O2/c1-3-12-10(11)9-6-4-8(2)5-7-9/h4-7H,3H2,1-2H3	C10H12O2	164.084	141.782	141.601	141.211	Lite	0	0	0	0	0	0	0	0	0	0
DTXCID4021636	(+/-)-alpha-Methylbenzyl acetate	93-92-5	CC(OC(C)=O)C1=CC=CC=C1	InChI=1/C10H12O2/c1-8(12-9(2)11)10-6-4-3-5-7-10/h3-8H,1-2H3	InChI=1/C10H12O2/c1-8(12-9(2)11)10-6-4-3-5-7-10/h3-8H,1-2H3	C10H12O2	164.084	140.117	139.553	139.366	Lite	0	0	0	0	0	0	0	0	0	0
DTXCID4024353	Ethyl phenylacetate	101-97-3	CCOC(=O)CC1=CC=CC=C1	InChI=1S/C10H12O2/c1-2-12-10(11)8-9-6-4-3-5-7-9/h3-7H,2,8H2,1H3	InChI=1S/C10H12O2/c1-2-12-10(11)8-9-6-4-3-5-7-9/h3-7H,2,8H2,1H3	C10H12O2	164.084	140.894	140.34	140.169	Lite	0	0	0	0	0	0	0	0	0	0
DTXCID4028175	2,4,6-Trimethylbenzoic acid	480-63-7	CC1=CC(C)=C(C(O)=O)C(C)=C1	InChI=1S/C10H12O2/c1-6-4-7(2)9(10(11)12)8(3)5-6/h4-5H,1-3H3,(H,11,12)	InChI=1S/C10H12O2/c1-6-4-7(2)9(10(11)12)8(3)5-6/h4-5H,1-3H3,(H,11,12)	C10H12O2	164.084			139.843	Lite	0	0	0	0	0	0	1	0	0	0
DTXCID407414	2,3-Dihydro-2,2-dimethyl-7-benzofuranol	1563-38-8	CC1(C)CC2=C(O1)C(O)=CC=C2	InChI=1S/C10H12O2/c1-10(2)6-7-4-3-5-8(11)9(7)12-10/h3-5,11H,6H2,1-2H3	InChI=1S/C10H12O2/c1-10(2)6-7-4-3-5-8(11)9(7)12-10/h3-5,11H,6H2,1-2H3	C10H12O2	164.084	138.602	138.553	138.253	Lite	0	1	0	0	0	0	0	0	0	1
DTXCID5024506	2-Phenylethyl acetate	103-45-7	CC(=O)OCCC1=CC=CC=C1	InChI=1S/C10H12O2/c1-9(11)12-8-7-10-5-3-2-4-6-10/h2-6H,7-8H2,1H3	InChI=1S/C10H12O2/c1-9(11)12-8-7-10-5-3-2-4-6-10/h2-6H,7-8H2,1H3	C10H12O2	164.084	138	137.747	137.676	Lite	0	0	0	0	0	0	0	0	0	0
DTXCID6024830	2-Hydroxy-2-methylpropiophenone	7473-98-5	CC(C)(O)C(=O)C1=CC=CC=C1	InChI=1S/C10H12O2/c1-10(2,12)9(11)8-6-4-3-5-7-8/h3-7,12H,1-2H3	InChI=1S/C10H12O2/c1-10(2,12)9(11)8-6-4-3-5-7-8/h3-7,12H,1-2H3	C10H12O2	164.084	139.433	139.239	139.133	Lite	0	0	0	1	0	0	0	0	0	1
DTXCID7024746	Propan-2-yl benzoate	939-48-0	CC(C)OC(=O)C1=CC=CC=C1	InChI=1S/C10H12O2/c1-8(2)12-10(11)9-6-4-3-5-7-9/h3-8H,1-2H3	InChI=1S/C10H12O2/c1-8(2)12-10(11)9-6-4-3-5-7-9/h3-8H,1-2H3	C10H12O2	164.084	139.353	139.645	140.384	Lite	0	0	0	0	0	0	0	0	0	0
DTXCID90617	Eugenol	97-53-0	COC1=C(O)C=CC(CC=C)=C1	InChI=1S/C10H12O2/c1-3-4-8-5-6-9(11)10(7-8)12-2/h3,5-7,11H,1,4H2,2H3	InChI=1S/C10H12O2/c1-3-4-8-5-6-9(11)10(7-8)12-2/h3,5-7,11H,1,4H2,2H3	C10H12O2	164.084	143.787	143.476	143.546	Lite	0	0	0	0	0	0	0	0	0	0
DTXCID4022494	Trimethoxypropylsilane	1067-25-0	CCC[Si](OC)(OC)OC	InChI=1S/C6H16O3Si/c1-5-6-10(7-2,8-3)9-4/h5-6H2,1-4H3	InChI=1S/C6H16O3Si/c1-5-6-10(7-2,8-3)9-4/h5-6H2,1-4H3	C6H16O3Si	164.087	133.633	133.555	133.642	Lite	0	0	0	0	0	0	0	0	0	0
DTXCID5017551	Fenuron	101-42-8	CN(C)C(=O)NC1=CC=CC=C1	InChI=1S/C9H12N2O/c1-11(2)9(12)10-8-6-4-3-5-7-8/h3-7H,1-2H3,(H,10,12)	InChI=1S/C9H12N2O/c1-11(2)9(12)10-8-6-4-3-5-7-8/h3-7H,1-2H3,(H,10,12)	C9H12N2O	164.095	140.61	139.415	139.384	Lite	0	0	0	0	1	0	0	0	0	1
DTXCID7024877	N-(3-Aminophenyl)propanamide	22987-10-6	CCC(=O)NC1=CC(N)=CC=C1	InChI=1S/C9H12N2O/c1-2-9(12)11-8-5-3-4-7(10)6-8/h3-6H,2,10H2,1H3,(H,11,12)	InChI=1S/C9H12N2O/c1-2-9(12)11-8-5-3-4-7(10)6-8/h3-6H,2,10H2,1H3,(H,11,12)	C9H12N2O	164.095	142.698	142.021	142.119	Lite	0	0	0	0	0	1	0	0	0	1
DTXCID506912	2-[2-(2-Methoxyethoxy)ethoxy]ethanol	112-35-6	COCCOCCOCCO	InChI=1S/C7H16O4/c1-9-4-5-11-7-6-10-3-2-8/h8H,2-7H2,1H3	InChI=1S/C7H16O4/c1-9-4-5-11-7-6-10-3-2-8/h8H,2-7H2,1H3	C7H16O4	164.105	139.995	139.926	140.393	Lite	0	0	0	0	0	0	0	0	0	0
DTXCID706457	2,2'-Azobis(2-methylpropanenitrile)	78-67-1	CC(C)(\N=N\C(C)(C)C#N)C#N	InChI=1S/C8H12N4/c1-7(2,5-9)11-12-8(3,4)6-10/h1-4H3/b12-11+	InChI=1S/C8H12N4/c1-7(2,5-9)11-12-8(3,4)6-10/h1-4H3/b12-11+	C8H12N4	164.106	148.023	146.731		Lite	0	0	0	0	0	0	0	0	0	0
DTXCID001771	4-(2-Methylbutan-2-yl)phenol	80-46-6	CCC(C)(C)C1=CC=C(O)C=C1	InChI=1S/C11H16O/c1-4-11(2,3)9-5-7-10(12)8-6-9/h5-8,12H,4H2,1-3H3	InChI=1S/C11H16O/c1-4-11(2,3)9-5-7-10(12)8-6-9/h5-8,12H,4H2,1-3H3	C11H16O	164.12	142.488	141.884	142	Lite	0	0	0	0	0	0	0	0	0	0
DTXCID00210187	Jasmone	488-10-8	CC\C=C/CC1=C(C)CCC1=O	InChI=1S/C11H16O/c1-3-4-5-6-10-9(2)7-8-11(10)12/h4-5H,3,6-8H2,1-2H3/b5-4-	InChI=1S/C11H16O/c1-3-4-5-6-10-9(2)7-8-11(10)12/h4-5H,3,6-8H2,1-2H3/b5-4-	C11H16O	164.12	146.434	145.954	145.545	Lite	0	0	0	0	0	0	0	0	0	0
DTXCID00212	2-tert-Butyl-4-methylphenol	2409-55-4	CC1=CC(=C(O)C=C1)C(C)(C)C	InChI=1S/C11H16O/c1-8-5-6-10(12)9(7-8)11(2,3)4/h5-7,12H,1-4H3	InChI=1S/C11H16O/c1-8-5-6-10(12)9(7-8)11(2,3)4/h5-7,12H,1-4H3	C11H16O	164.12	142.073	141.522	141.588	Lite	0	0	0	0	0	0	1	0	0	1
DTXCID2027468	2-tert-Butyl-6-methylphenol	2219-82-1	CC1=CC=CC(=C1O)C(C)(C)C	InChI=1S/C11H16O/c1-8-6-5-7-9(10(8)12)11(2,3)4/h5-7,12H,1-4H3	InChI=1S/C11H16O/c1-8-6-5-7-9(10(8)12)11(2,3)4/h5-7,12H,1-4H3	C11H16O	164.12	141.068	140.68	140.577	Lite	0	0	0	0	0	0	0	0	0	0
DTXCID3027617	2-Methoxy-4-methyl-1-(propan-2-yl)benzene	1076-56-8	COC1=CC(C)=CC=C1C(C)C	InChI=1S/C11H16O/c1-8(2)10-6-5-9(3)7-11(10)12-4/h5-8H,1-4H3	InChI=1S/C11H16O/c1-8(2)10-6-5-9(3)7-11(10)12-4/h5-8H,1-4H3	C11H16O	164.12	144.634	144.033	143.762	Lite	0	0	0	0	0	0	0	0	0	0
DTXCID601851	2-Methyl-4-phenylbutan-2-ol	103-05-9	CC(C)(O)CCC1=CC=CC=C1	InChI=1S/C11H16O/c1-11(2,12)9-8-10-6-4-3-5-7-10/h3-7,12H,8-9H2,1-2H3	InChI=1S/C11H16O/c1-11(2,12)9-8-10-6-4-3-5-7-10/h3-7,12H,8-9H2,1-2H3	C11H16O	164.12	141.938	141.49	141.855	Lite	0	0	0	0	0	0	0	0	0	0
DTXCID6021452	2-(1-Methylbutyl)phenol	87-26-3	CCCC(C)C1=C(O)C=CC=C1	InChI=1/C11H16O/c1-3-6-9(2)10-7-4-5-8-11(10)12/h4-5,7-9,12H,3,6H2,1-2H3	InChI=1/C11H16O/c1-3-6-9(2)10-7-4-5-8-11(10)12/h4-5,7-9,12H,3,6H2,1-2H3	C11H16O	164.12	143.59	143.049	143.025	Lite	1	0	0	0	1	0	1	0	0	1
DTXCID7024164	4-Pentylphenol	14938-35-3	CCCCCC1=CC=C(O)C=C1	InChI=1S/C11H16O/c1-2-3-4-5-10-6-8-11(12)9-7-10/h6-9,12H,2-5H2,1H3	InChI=1S/C11H16O/c1-2-3-4-5-10-6-8-11(12)9-7-10/h6-9,12H,2-5H2,1H3	C11H16O	164.12	145.098	144.956	144.817	Lite	0	0	0	0	0	0	0	0	0	0
DTXCID8027400	Carvacryl methyl ether	6379-73-3	COC1=CC(=CC=C1C)C(C)C	InChI=1S/C11H16O/c1-8(2)10-6-5-9(3)11(7-10)12-4/h5-8H,1-4H3	InChI=1S/C11H16O/c1-8(2)10-6-5-9(3)11(7-10)12-4/h5-8H,1-4H3	C11H16O	164.12	145.636	144.927	144.602	Lite	0	0	0	0	0	0	0	0	0	0
DTXCID806529	2-tert-Butyl-5-methylphenol	88-60-8	CC1=CC(O)=C(C=C1)C(C)(C)C	InChI=1S/C11H16O/c1-8-5-6-9(10(12)7-8)11(2,3)4/h5-7,12H,1-4H3	InChI=1S/C11H16O/c1-8-5-6-9(10(12)7-8)11(2,3)4/h5-7,12H,1-4H3	C11H16O	164.12	142.597	141.863	141.703	Lite	0	0	0	0	0	0	0	1	0	1
DTXCID103463	L-Phenylalanine	63-91-2	N[C@@H](CC1=CC=CC=C1)C(O)=O	InChI=1S/C9H11NO2/c10-8(9(11)12)6-7-4-2-1-3-5-7/h1-5,8H,6,10H2,(H,11,12)/t8-/m0/s1_x000D_	InChI=1S/C9H11NO2/c10-8(9(11)12)6-7-4-2-1-3-5-7/h1-5,8H,6,10H2,(H,11,12)/t8-/m0/s1	C9H11NO2	165.079	139.919	139.207	139.319	Lite	0	0	0	0	0	0	0	0	0	0
DTXCID301804	Benzocaine	94-09-7	CCOC(=O)C1=CC=C(N)C=C1	InChI=1S/C9H11NO2/c1-2-12-9(11)7-3-5-8(10)6-4-7/h3-6H,2,10H2,1H3	InChI=1S/C9H11NO2/c1-2-12-9(11)7-3-5-8(10)6-4-7/h3-6H,2,10H2,1H3	C9H11NO2	165.079	141.356	140.823	140.284	Lite	0	0	0	1	0	0	0	0	0	1
DTXCID4031196	N-(2-Methoxyphenyl)acetamide	93-26-5	COC1=CC=CC=C1NC(C)=O	InChI=1S/C9H11NO2/c1-7(11)10-8-5-3-4-6-9(8)12-2/h3-6H,1-2H3,(H,10,11)_x000D_	InChI=1S/C9H11NO2/c1-7(11)10-8-5-3-4-6-9(8)12-2/h3-6H,1-2H3,(H,10,11)	C9H11NO2	165.079	141.997	141.182	140.929	Lite	0	0	0	0	0	0	0	0	0	0
DTXCID805272	Ethyl anthranilate	87-25-2	CCOC(=O)C1=C(N)C=CC=C1	InChI=1S/C9H11NO2/c1-2-12-9(11)7-5-3-4-6-8(7)10/h3-6H,2,10H2,1H3	InChI=1S/C9H11NO2/c1-2-12-9(11)7-5-3-4-6-8(7)10/h3-6H,2,10H2,1H3	C9H11NO2	165.079	139.583	138.742	138.65	Lite	0	0	0	0	1	0	0	0	0	1
DTXCID9028174	4-Butyloxyaniline	4344-55-2	CCCCOC1=CC=C(N)C=C1	InChI=1S/C10H15NO/c1-2-3-8-12-10-6-4-9(11)5-7-10/h4-7H,2-3,8,11H2,1H3	InChI=1S/C10H15NO/c1-2-3-8-12-10-6-4-9(11)5-7-10/h4-7H,2-3,8,11H2,1H3	C10H15NO	165.115	150.394	156.497	141.906	Standard	0	0	0	0	0	0	1	0	0	0
DTXCID2031297	4-Bromobutyric acid	2623-87-2	OC(=O)CCCBr	InChI=1S/C4H7BrO2/c5-3-1-2-4(6)7/h1-3H2,(H,6,7)_x000D_	InChI=1S/C4H7BrO2/c5-3-1-2-4(6)7/h1-3H2,(H,6,7)	C4H7BrO2	165.963			114.107	Lite	0	0	0	0	0	0	0	0	0	0
DTXCID006080	Terephthalic acid	100-21-0	OC(=O)C1=CC=C(C=C1)C(O)=O	InChI=1S/C8H6O4/c9-7(10)5-1-2-6(4-3-5)8(11)12/h1-4H,(H,9,10)(H,11,12)	InChI=1S/C8H6O4/c9-7(10)5-1-2-6(4-3-5)8(11)12/h1-4H,(H,9,10)(H,11,12)	C8H6O4	166.027			137.939	Lite	0	0	0	0	0	0	0	1	0	1
DTXCID301485	1,3-Benzenedicarboxylic acid	121-91-5	OC(=O)C1=CC(=CC=C1)C(O)=O	InChI=1S/C8H6O4/c9-7(10)5-2-1-3-6(4-5)8(11)12/h1-4H,(H,9,10)(H,11,12)	InChI=1S/C8H6O4/c9-7(10)5-2-1-3-6(4-5)8(11)12/h1-4H,(H,9,10)(H,11,12)	C8H6O4	166.027			138.022	Lite	0	0	0	0	0	0	1	0	0	1
DTXCID901484	Monopotassium phthalate	877-24-7	[K+].OC(=O)C1=C(C=CC=C1)C([O-])=O	InChI=1S/C8H6O4.K/c9-7(10)5-3-1-2-4-6(5)8(11)12;/h1-4H,(H,9,10)(H,11,12);/q;+1/p-1	InChI=1S/C8H6O4/c9-7(10)5-3-1-2-4-6(5)8(11)12/h1-4H,(H,9,10)(H,11,12)	C8H6O4	166.027			134.725	Lite	1	0	0	0	1	0	1	0	0	1
DTXCID00577	Ethionamide	536-33-4	CCC1=NC=CC(=C1)C(N)=S	InChI=1S/C8H10N2S/c1-2-7-5-6(8(9)11)3-4-10-7/h3-5H,2H2,1H3,(H2,9,11)	InChI=1S/C8H10N2S/c1-2-7-5-6(8(9)11)3-4-10-7/h3-5H,2H2,1H3,(H2,9,11)	C8H10N2S	166.056	143.134	155.986	147.763	Standard	1	0	0	0	1	0	1	0	0	1
DTXCID002528	Ethylparaben	120-47-8	CCOC(=O)C1=CC=C(O)C=C1	InChI=1S/C9H10O3/c1-2-12-9(11)7-3-5-8(10)6-4-7/h3-6,10H,2H2,1H3	InChI=1S/C9H10O3/c1-2-12-9(11)7-3-5-8(10)6-4-7/h3-6,10H,2H2,1H3	C9H10O3	166.063	139.99	139.825	139.705	Lite	0	0	1	0	0	0	0	0	0	1
DTXCID30150926	Ethyl 3-hydroxybenzoate	7781-98-8	CCOC(=O)C1=CC(O)=CC=C1	InChI=1S/C9H10O3/c1-2-12-9(11)7-4-3-5-8(10)6-7/h3-6,10H,2H2,1H3_x000D_	InChI=1S/C9H10O3/c1-2-12-9(11)7-4-3-5-8(10)6-7/h3-6,10H,2H2,1H3	C9H10O3	166.063	140.625	139.698	139.469	Lite	0	0	0	0	0	0	0	0	0	0
DTXCID3027087	Methyl 2-methoxybenzoate	606-45-1	COC(=O)C1=C(OC)C=CC=C1	InChI=1S/C9H10O3/c1-11-8-6-4-3-5-7(8)9(10)12-2/h3-6H,1-2H3	InChI=1S/C9H10O3/c1-11-8-6-4-3-5-7(8)9(10)12-2/h3-6H,1-2H3	C9H10O3	166.063	139.826	139.319	138.886	Lite	0	0	0	0	1	0	0	0	0	1
DTXCID406285	Veratraldehyde	120-14-9	COC1=CC=C(C=O)C=C1OC	InChI=1S/C9H10O3/c1-11-8-4-3-7(6-10)5-9(8)12-2/h3-6H,1-2H3	InChI=1S/C9H10O3/c1-11-8-4-3-7(6-10)5-9(8)12-2/h3-6H,1-2H3	C9H10O3	166.063	142.142	141.465	141.11	Lite	0	0	0	1	0	0	0	0	0	1
DTXCID409356	4-Methyl-delta-3-tetrahydrophthalic anhydride	19438-64-3	CC1=CC2C(CC1)C(=O)OC2=O	InChI=1S/C9H10O3/c1-5-2-3-6-7(4-5)9(11)12-8(6)10/h4,6-7H,2-3H2,1H3_x000D_	InChI=1/C9H10O3/c1-5-2-3-6-7(4-5)9(11)12-8(6)10/h4,6-7H,2-3H2,1H3	C9H10O3	166.063	138.377	138.028	138.057	Lite	0	0	0	0	0	0	0	0	0	0
DTXCID5027645	Methyl 4-methoxybenzoate	121-98-2	COC(=O)C1=CC=C(OC)C=C1	InChI=1S/C9H10O3/c1-11-8-5-3-7(4-6-8)9(10)12-2/h3-6H,1-2H3	InChI=1S/C9H10O3/c1-11-8-5-3-7(4-6-8)9(10)12-2/h3-6H,1-2H3	C9H10O3	166.063	143.294	142.54	142.474	Lite	0	0	0	0	0	0	0	0	0	0
DTXCID5027649	4-Methoxybenzyl formate	122-91-8	COC1=CC=C(COC=O)C=C1	InChI=1S/C9H10O3/c1-11-9-4-2-8(3-5-9)6-12-7-10/h2-5,7H,6H2,1H3	InChI=1S/C9H10O3/c1-11-9-4-2-8(3-5-9)6-12-7-10/h2-5,7H,6H2,1H3	C9H10O3	166.063	141.751	140.743	140.502	Lite	0	0	0	0	0	0	0	0	0	0
DTXCID7021441	(2-Methylphenoxy)acetic acid	1878-49-5	CC1=C(OCC(O)=O)C=CC=C1	InChI=1S/C9H10O3/c1-7-4-2-3-5-8(7)12-6-9(10)11/h2-5H,6H2,1H3,(H,10,11)	InChI=1S/C9H10O3/c1-7-4-2-3-5-8(7)12-6-9(10)11/h2-5H,6H2,1H3,(H,10,11)	C9H10O3	166.063	139.695	139.335	139.151	Lite	0	0	0	0	0	0	0	0	0	0
DTXCID901968	3-Ethoxy-4-hydroxybenzaldehyde	121-32-4	CCOC1=C(O)C=CC(C=O)=C1	InChI=1S/C9H10O3/c1-2-12-9-5-7(6-10)3-4-8(9)11/h3-6,11H,2H2,1H3	InChI=1S/C9H10O3/c1-2-12-9-5-7(6-10)3-4-8(9)11/h3-6,11H,2H2,1H3	C9H10O3	166.063	142.449	140.572	140.498	Lite	0	1	0	0	0	0	0	0	0	1
DTXCID9031193	2,5-Dimethoxybenzaldehyde	93-02-7	COC1=CC=C(OC)C(C=O)=C1	InChI=1S/C9H10O3/c1-11-8-3-4-9(12-2)7(5-8)6-10/h3-6H,1-2H3	InChI=1S/C9H10O3/c1-11-8-3-4-9(12-2)7(5-8)6-10/h3-6H,1-2H3	C9H10O3	166.063	141.911	141.578	141.684	Lite	0	0	0	0	0	0	0	0	0	0
DTXCID90829	Methoxyphenylacetic acid	1701-77-5	COC(C(O)=O)C1=CC=CC=C1	InChI=1/C9H10O3/c1-12-8(9(10)11)7-5-3-2-4-6-7/h2-6,8H,1H3,(H,10,11)	InChI=1/C9H10O3/c1-12-8(9(10)11)7-5-3-2-4-6-7/h2-6,8H,1H3,(H,10,11)	C9H10O3	166.063	139.787	138.127	137.986	Lite	0	0	0	0	0	0	0	0	0	0
DTXCID9027447	Hydrazinecarboxylic acid, phenylmethyl ester	5331-43-1	NNC(=O)OCC1=CC=CC=C1	InChI=1S/C8H10N2O2/c9-10-8(11)12-6-7-4-2-1-3-5-7/h1-5H,6,9H2,(H,10,11)	InChI=1S/C8H10N2O2/c9-10-8(11)12-6-7-4-2-1-3-5-7/h1-5H,6,9H2,(H,10,11)	C8H10N2O2	166.074	136.666	136.979	136.441	Lite	0	0	0	0	0	0	0	0	0	0
DTXCID506991	Triethyl phosphite	122-52-1	CCOP(OCC)OCC	InChI=1S/C6H15O3P/c1-4-7-10(8-5-2)9-6-3/h4-6H2,1-3H3	InChI=1S/C6H15O3P/c1-4-7-10(8-5-2)9-6-3/h4-6H2,1-3H3	C6H15O3P	166.076	140.235	140.395	140.265	Lite	0	0	0	0	0	0	0	0	0	0
DTXCID604105	Fluorene	86-73-7	C1C2=C(C=CC=C2)C2=C1C=CC=C2	InChI=1S/C13H10/c1-3-7-12-10(5-1)9-11-6-2-4-8-13(11)12/h1-8H,9H2	InChI=1S/C13H10/c1-3-7-12-10(5-1)9-11-6-2-4-8-13(11)12/h1-8H,9H2	C13H10	166.078			137.767	Lite	0	0	0	0	0	0	0	0	0	0
DTXCID4028171	4-tert-Butylbenzenethiol	2396-68-1	CC(C)(C)C1=CC=C(S)C=C1	InChI=1S/C10H14S/c1-10(2,3)8-4-6-9(11)7-5-8/h4-7,11H,1-3H3	InChI=1S/C10H14S/c1-10(2,3)8-4-6-9(11)7-5-8/h4-7,11H,1-3H3	C10H14S	166.082			139.472	Lite	0	0	0	0	0	0	0	0	0	0
DTXCID403999	Cyromazine	66215-27-8	NC1=NC(NC2CC2)=NC(N)=N1	InChI=1S/C6H10N6/c7-4-10-5(8)12-6(11-4)9-3-1-2-3/h3H,1-2H2,(H5,7,8,9,10,11,12)	InChI=1S/C6H10N6/c7-4-10-5(8)12-6(11-4)9-3-1-2-3/h3H,1-2H2,(H5,7,8,9,10,11,12)	C6H10N6	166.097	140.22	140.7	140.64	Lite	0	0	0	0	0	0	0	0	0	0
DTXCID0027199	2-Methoxy-4-propylphenol	2785-87-7	CCCC1=CC(OC)=C(O)C=C1	InChI=1S/C10H14O2/c1-3-4-8-5-6-9(11)10(7-8)12-2/h5-7,11H,3-4H2,1-2H3	InChI=1S/C10H14O2/c1-3-4-8-5-6-9(11)10(7-8)12-2/h5-7,11H,3-4H2,1-2H3	C10H14O2	166.099	145.232	144.677	144.435	Lite	0	0	0	0	0	0	0	0	0	0
DTXCID1027001	(2,2-Dimethoxyethyl)benzene	101-48-4	COC(CC1=CC=CC=C1)OC	InChI=1S/C10H14O2/c1-11-10(12-2)8-9-6-4-3-5-7-9/h3-7,10H,8H2,1-2H3	InChI=1S/C10H14O2/c1-11-10(12-2)8-9-6-4-3-5-7-9/h3-7,10H,8H2,1-2H3	C10H14O2	166.099	140.992	140.09	142.817	Lite	0	0	0	0	0	0	0	0	0	0
DTXCID4018798	1,2-Diethoxybenzene	2050-46-6	CCOC1=CC=CC=C1OCC	InChI=1S/C10H14O2/c1-3-11-9-7-5-6-8-10(9)12-4-2/h5-8H,3-4H2,1-2H3	InChI=1S/C10H14O2/c1-3-11-9-7-5-6-8-10(9)12-4-2/h5-8H,3-4H2,1-2H3	C10H14O2	166.099	142.282	142.279	141.728	Lite	0	0	0	0	0	0	0	0	0	0
DTXCID5024712	1,4-Bis(methoxymethyl)benzene	6770-38-3	COCC1=CC=C(COC)C=C1	InChI=1S/C10H14O2/c1-11-7-9-3-5-10(6-4-9)8-12-2/h3-6H,7-8H2,1-2H3	InChI=1S/C10H14O2/c1-11-7-9-3-5-10(6-4-9)8-12-2/h3-6H,7-8H2,1-2H3	C10H14O2	166.099	145.188	144.613	143.904	Lite	0	0	0	0	0	0	0	0	0	0
DTXCID60220	tert-Butylhydroquinone	1948-33-0	CC(C)(C)C1=CC(O)=CC=C1O	InChI=1S/C10H14O2/c1-10(2,3)8-6-7(11)4-5-9(8)12/h4-6,11-12H,1-3H3	InChI=1S/C10H14O2/c1-10(2,3)8-6-7(11)4-5-9(8)12/h4-6,11-12H,1-3H3	C10H14O2	166.099	142.631	140.547	139.886	Lite	0	0	0	0	0	0	0	0	0	0
DTXCID8027589	6-Pentyl-2H-pyran-2-one	27593-23-3	CCCCCC1=CC=CC(=O)O1	InChI=1S/C10H14O2/c1-2-3-4-6-9-7-5-8-10(11)12-9/h5,7-8H,2-4,6H2,1H3	InChI=1S/C10H14O2/c1-2-3-4-6-9-7-5-8-10(11)12-9/h5,7-8H,2-4,6H2,1H3	C10H14O2	166.099	143.04	142.351	141.844	Lite	0	0	0	0	0	0	1	0	0	1
DTXCID804687	4-tert-Butylcatechol	98-29-3	CC(C)(C)C1=CC(O)=C(O)C=C1	InChI=1S/C10H14O2/c1-10(2,3)7-4-5-8(11)9(12)6-7/h4-6,11-12H,1-3H3	InChI=1S/C10H14O2/c1-10(2,3)7-4-5-8(11)9(12)6-7/h4-6,11-12H,1-3H3	C10H14O2	166.099	141.888	141.141	141.463	Lite	0	0	0	0	0	1	0	0	0	1
DTXCID4030469	2-Isobutyl-3-methoxypyrazine	24683-00-9	COC1=NC=CN=C1CC(C)C	InChI=1S/C9H14N2O/c1-7(2)6-8-9(12-3)11-5-4-10-8/h4-5,7H,6H2,1-3H3	InChI=1S/C9H14N2O/c1-7(2)6-8-9(12-3)11-5-4-10-8/h4-5,7H,6H2,1-3H3	C9H14N2O	166.111	141.102	141.253	140.596	Lite	0	0	0	0	0	0	0	0	0	0
DTXCID8027082	2-sec-Butyl-3-methoxypyrazine	24168-70-5	CCC(C)C1=NC=CN=C1OC	InChI=1/C9H14N2O/c1-4-7(2)8-9(12-3)11-6-5-10-8/h5-7H,4H2,1-3H3	InChI=1/C9H14N2O/c1-4-7(2)8-9(12-3)11-6-5-10-8/h5-7H,4H2,1-3H3	C9H14N2O	166.111	142.13	142.049	141.428	Lite	0	0	0	0	0	0	0	0	0	0
DTXCID8027088	2,6,6-Trimethyl-1-cyclohexene-1-acetaldehyde	472-66-2	CC1=C(CC=O)C(C)(C)CCC1	InChI=1S/C11H18O/c1-9-5-4-7-11(2,3)10(9)6-8-12/h8H,4-7H2,1-3H3	InChI=1S/C11H18O/c1-9-5-4-7-11(2,3)10(9)6-8-12/h8H,4-7H2,1-3H3	C11H18O	166.136	142.867	141.409	141.443	Lite	0	0	0	0	0	0	0	0	0	0
DTXCID8030136	Dihydrojasmone	1128-08-1	CCCCCC1=C(C)CCC1=O	InChI=1S/C11H18O/c1-3-4-5-6-10-9(2)7-8-11(10)12/h3-8H2,1-2H3_x000D_	InChI=1S/C11H18O/c1-3-4-5-6-10-9(2)7-8-11(10)12/h3-8H2,1-2H3	C11H18O	166.136	144.694	144.673	144.253	Lite	0	0	0	0	0	0	0	0	0	0
DTXCID501802	Dicyclohexyl	92-51-3	C1CCC(CC1)C1CCCCC1	InChI=1S/C12H22/c1-3-7-11(8-4-1)12-9-5-2-6-10-12/h11-12H,1-10H2	InChI=1S/C12H22/c1-3-7-11(8-4-1)12-9-5-2-6-10-12/h11-12H,1-10H2	C12H22	166.172				NA	0	0	0	0	0	0	0	0	0	0
DTXCID90807, DTXCID90807	Sodium 2-mercaptobenzothiolate, 2-Mercaptobenzothiazole	2492-26-4, 149-30-4	[Na+].[S-]C1=NC2=CC=CC=C2S1	InChI=1S/C7H5NS2.Na/c9-7-8-5-3-1-2-4-6(5)10-7;/h1-4H,(H,8,9);/q;+1/p-1	InChI=1S/C7H5NS2/c9-7-8-5-3-1-2-4-6(5)10-7/h1-4H,(H,8,9)	C7H5NS2	166.986	127.893	127.146	126.379	Lite	0	0	0	0	0	0	1	1	0	0
DTXCID602043	2,6-Pyridinedicarboxylic acid	499-83-2	OC(=O)C1=CC=CC(=N1)C(O)=O	InChI=1S/C7H5NO4/c9-6(10)4-2-1-3-5(8-4)7(11)12/h1-3H,(H,9,10)(H,11,12)	InChI=1S/C7H5NO4/c9-6(10)4-2-1-3-5(8-4)7(11)12/h1-3H,(H,9,10)(H,11,12)	C7H5NO4	167.022	137.647	137.407	137.134	Lite	0	1	0	0	0	0	0	0	0	1
DTXCID6021327	2,3-Pyridinedicarboxylic acid	89-00-9	OC(=O)C1=C(N=CC=C1)C(O)=O	InChI=1S/C7H5NO4/c9-6(10)4-2-1-3-8-5(4)7(11)12/h1-3H,(H,9,10)(H,11,12)	InChI=1S/C7H5NO4/c9-6(10)4-2-1-3-8-5(4)7(11)12/h1-3H,(H,9,10)(H,11,12)	C7H5NO4	167.022	134.743	134.52	134.522	Lite	0	0	1	0	0	0	0	0	0	1
DTXCID605737, DTXCID605737	Sodium 3-nitrobenzoate, 3-Nitrobenzoic acid	827-95-2, 121-92-6	[Na+].[O-]C(=O)C1=CC(=CC=C1)[N+]([O-])=O	InChI=1S/C7H5NO4.Na/c9-7(10)5-2-1-3-6(4-5)8(11)12;/h1-4H,(H,9,10);/q;+1/p-1	InChI=1S/C7H5NO4/c9-7(10)5-2-1-3-6(4-5)8(11)12/h1-4H,(H,9,10)	C7H5NO4	167.022	136.767	137.409	137.256	Lite	0	0	0	0	0	0	1	1	1	0
DTXCID90966	4-Nitrobenzoic acid	62-23-7	OC(=O)C1=CC=C(C=C1)[N+]([O-])=O	InChI=1S/C7H5NO4/c9-7(10)5-1-3-6(4-2-5)8(11)12/h1-4H,(H,9,10)	InChI=1S/C7H5NO4/c9-7(10)5-1-3-6(4-2-5)8(11)12/h1-4H,(H,9,10)	C7H5NO4	167.022	139.233	137.671	137.588	Lite	0	0	0	0	0	1	0	0	1	0
DTXCID803652	6-Thioguanine	154-42-7	NC1=NC2=C(NC=N2)C(=S)N1	InChI=1S/C5H5N5S/c6-5-9-3-2(4(11)10-5)7-1-8-3/h1H,(H4,6,7,8,9,10,11)	InChI=1S/C5H5N5S/c6-5-9-3-2(4(11)10-5)7-1-8-3/h1H,(H4,6,7,8,9,10,11)	C5H5N5S	167.027	139.084	150.052	135.287	Standard	0	0	0	0	0	0	0	1	0	0
DTXCID2024747	N-Butylphosphorothioic triamide	94317-64-3	CCCCNP(N)(N)=S	InChI=1S/C4H14N3PS/c1-2-3-4-7-8(5,6)9/h2-4H2,1H3,(H5,5,6,7,9)	InChI=1S/C4H14N3PS/c1-2-3-4-7-8(5,6)9/h2-4H2,1H3,(H5,5,6,7,9)	C4H14N3PS	167.065	136.296	136.655	136.205	Lite	0	0	0	0	0	0	0	1	0	1
DTXCID40248	Carbazole	86-74-8	N1C2=CC=CC=C2C2=C1C=CC=C2	InChI=1S/C12H9N/c1-3-7-11-9(5-1)10-6-2-4-8-12(10)13-11/h1-8,13H	InChI=1S/C12H9N/c1-3-7-11-9(5-1)10-6-2-4-8-12(10)13-11/h1-8,13H	C12H9N	167.073			136.755	Lite	1	0	0	0	1	0	1	0	0	1
DTXCID20196671	Phenylephrine hydrochloride	61-76-7	Cl.CNC[C@H](O)C1=CC(O)=CC=C1	InChI=1S/C9H13NO2.ClH/c1-10-6-9(12)7-3-2-4-8(11)5-7;/h2-5,9-12H,6H2,1H3;1H/t9-;/m0./s1	InChI=1S/C9H13NO2/c1-10-6-9(12)7-3-2-4-8(11)5-7/h2-5,9-12H,6H2,1H3/t9-/m0/s1	C9H13NO2	167.095	142.85	142.255	141.978	Lite	0	0	0	0	0	0	0	0	0	0
DTXCID8010588	p-Synephrine	94-07-5	CNCC(O)C1=CC=C(O)C=C1	InChI=1/C9H13NO2/c1-10-6-9(12)7-2-4-8(11)5-3-7/h2-5,9-12H,6H2,1H3	InChI=1/C9H13NO2/c1-10-6-9(12)7-2-4-8(11)5-3-7/h2-5,9-12H,6H2,1H3	C9H13NO2	167.095	143.057	142.16	141.757	Lite	0	0	0	0	0	0	0	0	0	0
DTXCID5024716	1-Cyclohexylpyrrolidin-2-one	6837-24-7	O=C1CCCN1C1CCCCC1	InChI=1S/C10H17NO/c12-10-7-4-8-11(10)9-5-2-1-3-6-9/h9H,1-8H2	InChI=1S/C10H17NO/c12-10-7-4-8-11(10)9-5-2-1-3-6-9/h9H,1-8H2	C10H17NO	167.131	141.301	141.094	140.755	Lite	0	0	0	0	0	0	0	1	0	0
DTXCID70209902	Citral oxime	13372-77-5	CC(C)=CCCC(C)=CC=NO	InChI=1S/C10H17NO/c1-9(2)5-4-6-10(3)7-8-11-12/h5,7-8,12H,4,6H2,1-3H3	InChI=1S/C10H17NO/c1-9(2)5-4-6-10(3)7-8-11-12/h5,7-8,12H,4,6H2,1-3H3	C10H17NO	167.131	147.477	147.674	147.143	Lite	0	0	0	0	0	0	0	0	0	0
DTXCID70423	(2Z)-2,3-Dichloro-4-oxobut-2-enoic acid	87-56-9	OC(=O)C(\Cl)=C(\Cl)C=O	InChI=1S/C4H2Cl2O3/c5-2(1-7)3(6)4(8)9/h1H,(H,8,9)/b3-2-	InChI=1S/C4H2Cl2O3/c5-2(1-7)3(6)4(8)9/h1H,(H,8,9)/b3-2-	C4H2Cl2O3	167.938	115.905	115.937	115.67	Lite	0	0	0	0	0	0	0	0	0	0
DTXCID3022249	Phenylarsine oxide	637-03-6	O=[As]C1=CC=CC=C1	InChI=1S/C6H5AsO/c8-7-6-4-2-1-3-5-6/h1-5H	InChI=1S/C6H5AsO/c8-7-6-4-2-1-3-5-6/h1-5H	C6H5AsO	167.956				NA	0	0	0	0	0	0	0	0	0	0
DTXCID001836	1,4-Dinitrobenzene	100-25-4	[O-][N+](=O)C1=CC=C(C=C1)[N+]([O-])=O	InChI=1S/C6H4N2O4/c9-7(10)5-1-2-6(4-3-5)8(11)12/h1-4H	InChI=1S/C6H4N2O4/c9-7(10)5-1-2-6(4-3-5)8(11)12/h1-4H	C6H4N2O4	168.017	137.776	137.046	136.936	Lite	0	0	0	0	0	0	0	0	0	0
DTXCID204065	1,3-Dinitrobenzene	99-65-0	[O-][N+](=O)C1=CC(=CC=C1)[N+]([O-])=O	InChI=1S/C6H4N2O4/c9-7(10)5-2-1-3-6(4-5)8(11)12/h1-4H	InChI=1S/C6H4N2O4/c9-7(10)5-2-1-3-6(4-5)8(11)12/h1-4H	C6H4N2O4	168.017	132.848	137.102	136.505	Lite	0	0	0	0	0	0	0	0	0	0
DTXCID604066	1,2-Dinitrobenzene	528-29-0	[O-][N+](=O)C1=C(C=CC=C1)[N+]([O-])=O	InChI=1S/C6H4N2O4/c9-7(10)5-3-1-2-4-6(5)8(11)12/h1-4H	InChI=1S/C6H4N2O4/c9-7(10)5-3-1-2-4-6(5)8(11)12/h1-4H	C6H4N2O4	168.017	134.551	134.476	134.214	Lite	0	0	0	0	0	0	0	0	0	0
NoDTXCID20	Trimethylsilyl silicate	56275-01-5		InChI=1S/C3H12O4Si2/c1-8(2,3)7-9(4,5)6/h4-6H,1-3H3	InChI=1S/C3H12O4Si2/c1-8(2,3)7-9(4,5)6/h4-6H,1-3H3	C3H12O4Si2	168.027	120.078	120.454	118.815	Lite	0	0	0	0	0	0	0	0	0	0
DTXCID8024945	2,2'-(Methanediyldisulfanediyl)diethanol	44860-68-6	OCCSCSCCO	InChI=1S/C5H12O2S2/c6-1-3-8-5-9-4-2-7/h6-7H,1-5H2	InChI=1S/C5H12O2S2/c6-1-3-8-5-9-4-2-7/h6-7H,1-5H2	C5H12O2S2	168.028	138.502	135.457	135.842	Lite	0	0	0	0	0	0	0	0	0	0
DTXCID1022508	Uric acid	69-93-2	O=C1NC2=C(N1)C(=O)NC(=O)N2	InChI=1S/C5H4N4O3/c10-3-1-2(7-4(11)6-1)8-5(12)9-3/h(H4,6,7,8,9,10,11,12)	InChI=1S/C5H4N4O3/c10-3-1-2(7-4(11)6-1)8-5(12)9-3/h(H4,6,7,8,9,10,11,12)	C5H4N4O3	168.028	135.441	135.584	134.46	Lite	0	0	0	0	0	0	0	0	0	0
DTXCID9028178	Ethyl 4-chlorophenyl ketone	6285-05-08	CCC(=O)C1=CC=C(Cl)C=C1	InChI=1S/C9H9ClO/c1-2-9(11)7-3-5-8(10)6-4-7/h3-6H,2H2,1H3	InChI=1S/C9H9ClO/c1-2-9(11)7-3-5-8(10)6-4-7/h3-6H,2H2,1H3	C9H9ClO	168.034	132.235	132.046	131.573	Lite	0	0	0	0	0	0	0	0	0	0
DTXCID9014	Dehydroacetic acid	520-45-6	CC(=O)C1C(=O)OC(C)=CC1=O	InChI=1/C8H8O4/c1-4-3-6(10)7(5(2)9)8(11)12-4/h3,7H,1-2H3	InChI=1/C8H8O4/c1-4-3-6(10)7(5(2)9)8(11)12-4/h3,7H,1-2H3	C8H8O4	168.042	139.599	138.945	138.999	Lite	0	0	0	0	0	0	0	0	0	0
DTXCID90911555	Sodium dehydroacetate	4418-26-2	[Na+].C\C([O-])=C1/C(=O)OC(C)=CC1=O	InChI=1S/C8H8O4.Na/c1-4-3-6(10)7(5(2)9)8(11)12-4;/h3,9H,1-2H3;/q;+1/p-1/b7-5+;	InChI=1S/C8H8O4/c1-4-3-6(10)7(5(2)9)8(11)12-4/h3,10H,1-2H3	C8H8O4	168.042	138.05	137.419	137.101	Lite	0	0	0	0	0	0	0	0	0	0
DTXCID1024750	4-Methoxy-2-nitroaniline	96-96-8	COC1=CC=C(N)C(=C1)[N+]([O-])=O	InChI=1S/C7H8N2O3/c1-12-5-2-3-6(8)7(4-5)9(10)11/h2-4H,8H2,1H3	InChI=1S/C7H8N2O3/c1-12-5-2-3-6(8)7(4-5)9(10)11/h2-4H,8H2,1H3	C7H8N2O3	168.054	139.891	138.993	139.075	Lite	0	0	1	0	0	0	0	0	1	0
DTXCID60943	2-Methoxy-5-nitroaniline	99-59-2	COC1=C(N)C=C(C=C1)[N+]([O-])=O	InChI=1S/C7H8N2O3/c1-12-7-3-2-5(9(10)11)4-6(7)8/h2-4H,8H2,1H3	InChI=1S/C7H8N2O3/c1-12-7-3-2-5(9(10)11)4-6(7)8/h2-4H,8H2,1H3	C7H8N2O3	168.054	139.483	138.853	138.806	Lite	0	0	0	0	0	0	0	0	0	0
DTXCID8018700	2-Methoxy-4-nitroaniline	97-52-9	COC1=CC(=CC=C1N)[N+]([O-])=O	InChI=1S/C7H8N2O3/c1-12-7-4-5(9(10)11)2-3-6(7)8/h2-4H,8H2,1H3	InChI=1S/C7H8N2O3/c1-12-7-4-5(9(10)11)2-3-6(7)8/h2-4H,8H2,1H3	C7H8N2O3	168.054	139.918	139.159	139.049	Lite	0	1	0	0	0	0	0	0	1	0
DTXCID801993	Dibenzofuran	132-64-9	O1C2=CC=CC=C2C2=C1C=CC=C2	InChI=1S/C12H8O/c1-3-7-11-9(5-1)10-6-2-4-8-12(10)13-11/h1-8H	InChI=1S/C12H8O/c1-3-7-11-9(5-1)10-6-2-4-8-12(10)13-11/h1-8H	C12H8O	168.058	135.833	135.689	135.334	Lite	0	0	0	0	0	0	0	0	0	0
DTXCID0028167	4-Butylchlorobenzene	15499-27-1	CCCCC1=CC=C(Cl)C=C1	InChI=1S/C10H13Cl/c1-2-3-4-9-5-7-10(11)8-6-9/h5-8H,2-4H2,1H3	InChI=1S/C10H13Cl/c1-2-3-4-9-5-7-10(11)8-6-9/h5-8H,2-4H2,1H3	C10H13Cl	168.071			133.79	Lite	0	0	0	0	0	0	0	0	0	0
DTXCID3015163	1,2,4-Trimethoxybenzene	135-77-3	COC1=CC=C(OC)C(OC)=C1	InChI=1S/C9H12O3/c1-10-7-4-5-8(11-2)9(6-7)12-3/h4-6H,1-3H3	InChI=1S/C9H12O3/c1-10-7-4-5-8(11-2)9(6-7)12-3/h4-6H,1-3H3	C9H12O3	168.079	144.795	143.496	143.704	Lite	0	0	0	0	0	0	0	0	0	0
DTXCID004143	1,6-Diisocyanatohexane	822-06-0	O=C=NCCCCCCN=C=O	InChI=1S/C8H12N2O2/c11-7-9-5-3-1-2-4-6-10-8-12/h1-6H2	InChI=1S/C8H12N2O2/c11-7-9-5-3-1-2-4-6-10-8-12/h1-6H2	C8H12N2O2	168.09	144.37	144.883	144.714	Lite	0	0	0	0	0	0	0	0	0	0
DTXCID8024656	3,3'-(Ethylenedioxy)dipropiononitrile	3386-87-6	N#CCCOCCOCCC#N	InChI=1S/C8H12N2O2/c9-3-1-5-11-7-8-12-6-2-4-10/h1-2,5-8H2	InChI=1S/C8H12N2O2/c9-3-1-5-11-7-8-12-6-2-4-10/h1-2,5-8H2	C8H12N2O2	168.09	144.263	144.217	143.9	Lite	0	0	0	0	0	0	0	0	0	0
DTXCID2027177	4-Phenyltoluene	644-08-6	CC1=CC=C(C=C1)C1=CC=CC=C1	InChI=1S/C13H12/c1-11-7-9-13(10-8-11)12-5-3-2-4-6-12/h2-10H,1H3	InChI=1S/C13H12/c1-11-7-9-13(10-8-11)12-5-3-2-4-6-12/h2-10H,1H3	C13H12	168.094			143.751	Lite	0	0	0	0	0	0	0	0	0	0
DTXCID9021891	Diphenylmethane	101-81-5	C(C1=CC=CC=C1)C1=CC=CC=C1	InChI=1S/C13H12/c1-3-7-12(8-4-1)11-13-9-5-2-6-10-13/h1-10H,11H2	InChI=1S/C13H12/c1-3-7-12(8-4-1)11-13-9-5-2-6-10-13/h1-10H,11H2	C13H12	168.094			143.293	Lite	0	0	0	0	0	0	0	0	0	0
DTXCID1027639	Methyl 2-nonynoate	111-80-8	CCCCCCC#CC(=O)OC	InChI=1S/C10H16O2/c1-3-4-5-6-7-8-9-10(11)12-2/h3-7H2,1-2H3	InChI=1S/C10H16O2/c1-3-4-5-6-7-8-9-10(11)12-2/h3-7H2,1-2H3	C10H16O2	168.115	154.528	153.767	153.709	Lite	0	0	0	0	0	0	0	0	0	0
DTXCID50210233	2,4-Hexadienyl isobutyrate	16491-24-0	CC=CC=CCOC(=O)C(C)C	InChI=1S/C10H16O2/c1-4-5-6-7-8-12-10(11)9(2)3/h4-7,9H,8H2,1-3H3	InChI=1S/C10H16O2/c1-4-5-6-7-8-12-10(11)9(2)3/h4-7,9H,8H2,1-3H3	C10H16O2	168.115	149.209	148.602	148.319	Lite	0	0	0	0	0	0	0	0	0	0
DTXCID7022097	Limonene dioxide	96-08-2	CC1OC1C1CCC2(C)OC2C1	InChI=1/C10H16O2/c1-6-9(11-6)7-3-4-10(2)8(5-7)12-10/h6-9H,3-5H2,1-2H3	InChI=1/C10H16O2/c1-6-9(11-6)7-3-4-10(2)8(5-7)12-10/h6-9H,3-5H2,1-2H3	C10H16O2	168.115	138.005	137.248	136.975	Lite	0	0	0	0	0	0	0	0	0	0
DTXCID7065251	Geranic acid	459-80-3	CC(C)=CCCC(C)=CC(O)=O	InChI=1S/C10H16O2/c1-8(2)5-4-6-9(3)7-10(11)12/h5,7H,4,6H2,1-3H3,(H,11,12)	InChI=1S/C10H16O2/c1-8(2)5-4-6-9(3)7-10(11)12/h5,7H,4,6H2,1-3H3,(H,11,12)	C10H16O2	168.115			143.981	Lite	0	0	0	0	0	0	0	0	0	0
DTXCID8030055	Cyclohexyl methacrylate	101-43-9	CC(=C)C(=O)OC1CCCCC1	InChI=1S/C10H16O2/c1-8(2)10(11)12-9-6-4-3-5-7-9/h9H,1,3-7H2,2H3_x000D_	InChI=1S/C10H16O2/c1-8(2)10(11)12-9-6-4-3-5-7-9/h9H,1,3-7H2,2H3	C10H16O2	168.115	142.477	142.052	141.864	Lite	0	0	0	0	0	0	0	0	0	0
DTXCID1017757	Undec-10-enal	112-45-8	C=CCCCCCCCCC=O	InChI=1S/C11H20O/c1-2-3-4-5-6-7-8-9-10-11-12/h2,11H,1,3-10H2	InChI=1S/C11H20O/c1-2-3-4-5-6-7-8-9-10-11-12/h2,11H,1,3-10H2	C11H20O	168.151	153.894	153.958	153.87	Lite	0	0	0	0	0	0	0	0	0	0
DTXCID10210517	Undec-8-enal	58296-81-4	CCC=CCCCCCCC=O	InChI=1S/C11H20O/c1-2-3-4-5-6-7-8-9-10-11-12/h3-4,11H,2,5-10H2,1H3_x000D_	InChI=1S/C11H20O/c1-2-3-4-5-6-7-8-9-10-11-12/h3-4,11H,2,5-10H2,1H3	C11H20O	168.151	155.913	155.69	155.626	Lite	0	0	0	0	0	0	0	0	0	0
DTXCID2027127	4-(tert-Pentyl)-cyclohexanone	16587-71-6	CCC(C)(C)C1CCC(=O)CC1	InChI=1S/C11H20O/c1-4-11(2,3)9-5-7-10(12)8-6-9/h9H,4-8H2,1-3H3	InChI=1S/C11H20O/c1-4-11(2,3)9-5-7-10(12)8-6-9/h9H,4-8H2,1-3H3	C11H20O	168.151	143.369	143.537	143.235	Lite	0	0	0	0	0	0	0	0	0	0
DTXCID7027415	Ethyl linalool	10339-55-6	CC\C(C)=C\CCC(C)(O)C=C	InChI=1/C11H20O/c1-5-10(3)8-7-9-11(4,12)6-2/h6,8,12H,2,5,7,9H2,1,3-4H3/b10-8+	InChI=1/C11H20O/c1-5-10(3)8-7-9-11(4,12)6-2/h6,8,12H,2,5,7,9H2,1,3-4H3/b10-8+	C11H20O	168.151	151.414	151.111	151.047	Lite	0	0	0	0	0	0	0	0	0	0
DTXCID10210431	2,2,4,6,6-Pentamethylhept-3-ene	123-48-8	CC(CC(C)(C)C)=CC(C)(C)C	InChI=1S/C12H24/c1-10(8-11(2,3)4)9-12(5,6)7/h8H,9H2,1-7H3_x000D_	InChI=1S/C12H24/c1-10(8-11(2,3)4)9-12(5,6)7/h8H,9H2,1-7H3	C12H24	168.188			147.188	Lite	0	0	0	0	0	0	0	0	0	0
DTXCID306914	1-Dodecene	112-41-4	CCCCCCCCCCC=C	InChI=1S/C12H24/c1-3-5-7-9-11-12-10-8-6-4-2/h3H,1,4-12H2,2H3	InChI=1S/C12H24/c1-3-5-7-9-11-12-10-8-6-4-2/h3H,1,4-12H2,2H3	C12H24	168.188				NA	0	0	0	0	0	0	0	0	0	0
DTXCID6030861	2-Chlorobenzothiazole	615-20-3	ClC1=NC2=CC=CC=C2S1	InChI=1S/C7H4ClNS/c8-7-9-5-3-1-2-4-6(5)10-7/h1-4H	InChI=1S/C7H4ClNS/c8-7-9-5-3-1-2-4-6(5)10-7/h1-4H	C7H4ClNS	168.975	118.793	118.078	117.667	Lite	0	0	0	0	0	0	0	0	0	0
DTXCID0021545	6-Chloro-2,3-dihydrobenzoxazol-2-one	19932-84-4	ClC1=CC2=C(NC(=O)O2)C=C1	InChI=1S/C7H4ClNO2/c8-4-1-2-5-6(3-4)11-7(10)9-5/h1-3H,(H,9,10)	InChI=1S/C7H4ClNO2/c8-4-1-2-5-6(3-4)11-7(10)9-5/h1-3H,(H,9,10)	C7H4ClNO2	168.993	124.706	149.198	123.521	Standard	0	0	0	0	0	0	1	0	0	0
DTXCID1021409	2-Chloro-N-phenylacetamide	587-65-5	ClCC(=O)NC1=CC=CC=C1	InChI=1S/C8H8ClNO/c9-6-8(11)10-7-4-2-1-3-5-7/h1-5H,6H2,(H,10,11)	InChI=1S/C8H8ClNO/c9-6-8(11)10-7-4-2-1-3-5-7/h1-5H,6H2,(H,10,11)	C8H8ClNO	169.029	131.299	130.351	130.225	Lite	0	0	0	0	0	0	0	0	0	0
DTXCID9027021	Sodium 2-methoxy-5-nitrophenolate	67233-85-6	[Na+].COC1=C([O-])C=C(C=C1)[N+]([O-])=O	InChI=1S/C7H7NO4.Na/c1-12-7-3-2-5(8(10)11)4-6(7)9;/h2-4,9H,1H3;/q;+1/p-1	InChI=1S/C7H7NO4/c1-12-7-3-2-5(8(10)11)4-6(7)9/h2-4,9H,1H3	C7H7NO4	169.037	138.918	138.728	138.36	Lite	0	0	0	0	0	0	0	0	0	0
DTXCID50197232	Norepinephrine	51-41-2	NC[C@H](O)C1=CC=C(O)C(O)=C1	InChI=1S/C8H11NO3/c9-4-8(12)5-1-2-6(10)7(11)3-5/h1-3,8,10-12H,4,9H2/t8-/m0/s1	InChI=1S/C8H11NO3/c9-4-8(12)5-1-2-6(10)7(11)3-5/h1-3,8,10-12H,4,9H2/t8-/m0/s1	C8H11NO3	169.074	141.763	140.958	140.824	Lite	0	0	0	0	0	0	0	0	0	0
DTXCID903541, DTXCID903541	Pyridoxine hydrochloride, Pyridoxine	58-56-0, 65-23-6	Cl.CC1=NC=C(CO)C(CO)=C1O	InChI=1S/C8H11NO3.ClH/c1-5-8(12)7(4-11)6(3-10)2-9-5;/h2,10-12H,3-4H2,1H3;1H	InChI=1S/C8H11NO3/c1-5-8(12)7(4-11)6(3-10)2-9-5/h2,10-12H,3-4H2,1H3	C8H11NO3	169.074	139.272	138.757	138.78	Lite	0	0	0	0	0	0	0	0	0	0
DTXCID001975	Diphenylamine	122-39-4	N(C1=CC=CC=C1)C1=CC=CC=C1	InChI=1S/C12H11N/c1-3-7-11(8-4-1)13-12-9-5-2-6-10-12/h1-10,13H	InChI=1S/C12H11N/c1-3-7-11(8-4-1)13-12-9-5-2-6-10-12/h1-10,13H	C12H11N	169.089	144.043	153.676	136.474	Standard	0	0	0	0	0	0	1	0	0	0
DTXCID9071	4-Biphenylamine hydrochloride	2113-61-3	Cl.NC1=CC=C(C=C1)C1=CC=CC=C1	InChI=1S/C12H11N.ClH/c13-12-8-6-11(7-9-12)10-4-2-1-3-5-10;/h1-9H,13H2;1H	InChI=1S/C12H11N/c13-12-8-6-11(7-9-12)10-4-2-1-3-5-10/h1-9H,13H2	C12H11N	169.089	150.442	154.763	135.776	Standard	0	0	0	0	0	0	0	0	0	0
DTXCID904916	Diacetone acrylamide	2873-97-4	CC(=O)CC(C)(C)NC(=O)C=C	InChI=1S/C9H15NO2/c1-5-8(12)10-9(3,4)6-7(2)11/h5H,1,6H2,2-4H3,(H,10,12)	InChI=1S/C9H15NO2/c1-5-8(12)10-9(3,4)6-7(2)11/h5H,1,6H2,2-4H3,(H,10,12)	C9H15NO2	169.11	145.724	144.914	144.589	Lite	0	0	0	0	0	0	0	1	0	0
DTXCID6024701	Methyl 2-chlorobenzoate	610-96-8	COC(=O)C1=C(Cl)C=CC=C1	InChI=1S/C8H7ClO2/c1-11-8(10)6-4-2-3-5-7(6)9/h2-5H,1H3	InChI=1S/C8H7ClO2/c1-11-8(10)6-4-2-3-5-7(6)9/h2-5H,1H3	C8H7ClO2	170.013	130.301	129.799	129.482	Lite	0	0	0	0	0	0	0	0	0	0
DTXCID3021512	4-Chlorophenylurea	140-38-5	NC(=O)NC1=CC=C(Cl)C=C1	InChI=1S/C7H7ClN2O/c8-5-1-3-6(4-2-5)10-7(9)11/h1-4H,(H3,9,10,11)	InChI=1S/C7H7ClN2O/c8-5-1-3-6(4-2-5)10-7(9)11/h1-4H,(H3,9,10,11)	C7H7ClN2O	170.025	129.915	129.425	129.521	Lite	0	0	0	0	0	1	0	0	0	0
DTXCID101209	6-Propyl-2-thiouracil	51-52-5	CCCC1=CC(=O)NC(=S)N1	InChI=1S/C7H10N2OS/c1-2-3-5-4-6(10)9-7(11)8-5/h4H,2-3H2,1H3,(H2,8,9,10,11)	InChI=1S/C7H10N2OS/c1-2-3-5-4-6(10)9-7(11)8-5/h4H,2-3H2,1H3,(H2,8,9,10,11)	C7H10N2OS	170.051	139.844	139.636	139.166	Lite	0	0	0	0	0	0	1	0	0	0
DTXCID7024615	Ethylene acrylate	2274-11-05	C=CC(=O)OCCOC(=O)C=C	InChI=1S/C8H10O4/c1-3-7(9)11-5-6-12-8(10)4-2/h3-4H,1-2,5-6H2	InChI=1S/C8H10O4/c1-3-7(9)11-5-6-12-8(10)4-2/h3-4H,1-2,5-6H2	C8H10O4	170.058	138.407	138.111	138.096	Lite	0	0	0	0	0	0	0	0	0	0
DTXCID0021389	2'-Acetonaphthone	93-08-3	CC(=O)C1=CC2=CC=CC=C2C=C1	InChI=1S/C12H10O/c1-9(13)11-7-6-10-4-2-3-5-12(10)8-11/h2-8H,1H3	InChI=1S/C12H10O/c1-9(13)11-7-6-10-4-2-3-5-12(10)8-11/h2-8H,1H3	C12H10O	170.073	142.613	141.936	141.879	Lite	0	0	0	0	0	1	0	0	0	1
DTXCID1031208	1'-Acetonaphthone	941-98-0	CC(=O)C1=CC=CC2=CC=CC=C12	InChI=1S/C12H10O/c1-9(13)11-8-4-6-10-5-2-3-7-12(10)11/h2-8H,1H3_x000D_	InChI=1S/C12H10O/c1-9(13)11-8-4-6-10-5-2-3-7-12(10)11/h2-8H,1H3	C12H10O	170.073	140.519	139.917	139.815	Lite	0	0	0	0	0	0	0	0	0	0
DTXCID201151, DTXCID201151	Sodium 2-phenylphenate tetrahydrate, 2-Phenylphenol	6152-33-6, 90-43-7	O.O.O.O.[Na+].[O-]C1=C(C=CC=C1)C1=CC=CC=C1	InChI=1S/C12H10O.Na.4H2O/c13-12-9-5-4-8-11(12)10-6-2-1-3-7-10;;;;;/h1-9,13H;;4*1H2/q;+1;;;;/p-1	InChI=1S/C12H10O/c13-12-9-5-4-8-11(12)10-6-2-1-3-7-10/h1-9,13H	C12H10O	170.073	140.826	140.392	140.31	Lite	0	0	0	1	0	0	0	1	0	1
DTXCID601152	4-Phenylphenol	92-69-3	OC1=CC=C(C=C1)C1=CC=CC=C1	InChI=1S/C12H10O/c13-12-8-6-11(7-9-12)10-4-2-1-3-5-10/h1-9,13H	InChI=1S/C12H10O/c13-12-8-6-11(7-9-12)10-4-2-1-3-5-10/h1-9,13H	C12H10O	170.073	143.427	142.384	142.345	Lite	0	0	0	0	1	0	0	0	0	1
DTXCID602462	3-Phenylphenol	580-51-8	OC1=CC=CC(=C1)C1=CC=CC=C1	InChI=1S/C12H10O/c13-12-8-4-7-11(9-12)10-5-2-1-3-6-10/h1-9,13H	InChI=1S/C12H10O/c13-12-8-4-7-11(9-12)10-5-2-1-3-6-10/h1-9,13H	C12H10O	170.073	142.534	142.211	142.029	Lite	0	0	0	0	0	0	0	0	0	0
DTXCID701847	Diphenyl oxide	101-84-8	O(C1=CC=CC=C1)C1=CC=CC=C1	InChI=1S/C12H10O/c1-3-7-11(8-4-1)13-12-9-5-2-6-10-12/h1-10H	InChI=1S/C12H10O/c1-3-7-11(8-4-1)13-12-9-5-2-6-10-12/h1-10H	C12H10O	170.073	143.729	142.769	142.337	Lite	0	0	0	0	0	0	0	0	0	0
DTXCID502191	Tetrahydrofurfuryl methacrylate	2455-24-5	CC(=C)C(=O)OCC1CCCO1	InChI=1/C9H14O3/c1-7(2)9(10)12-6-8-4-3-5-11-8/h8H,1,3-6H2,2H3	InChI=1/C9H14O3/c1-7(2)9(10)12-6-8-4-3-5-11-8/h8H,1,3-6H2,2H3	C9H14O3	170.094	144.596	144.595	144.108	Lite	0	0	0	0	0	0	0	0	0	0
DTXCID90112383	(2,2,6,6-Tetramethyl-4-oxopiperidin-1-yl)oxidanyl	2896-70-0	CC1(C)CC(=O)CC(C)(C)N1[O]	InChI=1S/C9H16NO2/c1-8(2)5-7(11)6-9(3,4)10(8)12/h5-6H2,1-4H3	InChI=1S/C9H16NO2/c1-8(2)5-7(11)6-9(3,4)10(8)12/h5-6H2,1-4H3	C9H16NO2	170.118	138.161	137.87	137.905	Lite	0	0	0	0	0	0	0	0	0	0
DTXCID00112738	Methyl 3-nonenoate	13481-87-3	CCCCCC=CCC(=O)OC	InChI=1S/C10H18O2/c1-3-4-5-6-7-8-9-10(11)12-2/h7-8H,3-6,9H2,1-2H3	InChI=1S/C10H18O2/c1-3-4-5-6-7-8-9-10(11)12-2/h7-8H,3-6,9H2,1-2H3	C10H18O2	170.131	154.063	153.435	153.394	Lite	0	0	0	0	0	0	0	0	0	0
DTXCID002109	gamma-Decanolactone	706-14-9	CCCCCCC1CCC(=O)O1	InChI=1/C10H18O2/c1-2-3-4-5-6-9-7-8-10(11)12-9/h9H,2-8H2,1H3	InChI=1/C10H18O2/c1-2-3-4-5-6-9-7-8-10(11)12-9/h9H,2-8H2,1H3	C10H18O2	170.131	144.807	144.304	143.683	Lite	0	0	0	0	0	0	0	0	0	0
DTXCID009575	{4-[(Ethenyloxy)methyl]cyclohexyl}methanol	114651-37-5	OCC1CCC(COC=C)CC1	InChI=1S/C10H18O2/c1-2-12-8-10-5-3-9(7-11)4-6-10/h2,9-11H,1,3-8H2	InChI=1S/C10H18O2/c1-2-12-8-10-5-3-9(7-11)4-6-10/h2,9-11H,1,3-8H2	C10H18O2	170.131	142.736	142.321	142.181	Lite	0	0	0	0	0	0	0	0	0	0
DTXCID1024754	Prop-2-en-1-yl heptanoate	142-19-8	CCCCCCC(=O)OCC=C	InChI=1S/C10H18O2/c1-3-5-6-7-8-10(11)12-9-4-2/h4H,2-3,5-9H2,1H3	InChI=1S/C10H18O2/c1-3-5-6-7-8-10(11)12-9-4-2/h4H,2-3,5-9H2,1H3	C10H18O2	170.131	149.832	149.647	149.195	Lite	0	0	0	0	0	0	0	0	0	0
DTXCID1027188	2-Cyclohexylethyl acetate	21722-83-8	CC(=O)OCCC1CCCCC1	InChI=1S/C10H18O2/c1-9(11)12-8-7-10-5-3-2-4-6-10/h10H,2-8H2,1H3	InChI=1S/C10H18O2/c1-9(11)12-8-7-10-5-3-2-4-6-10/h10H,2-8H2,1H3	C10H18O2	170.131	144.949	144.925	144.593	Lite	0	0	0	0	0	0	0	0	0	0
DTXCID1027637	Methyl non-2-enoate	111-79-5	CCCCCCC=CC(=O)OC	InChI=1S/C10H18O2/c1-3-4-5-6-7-8-9-10(11)12-2/h8-9H,3-7H2,1-2H3_x000D_	InChI=1S/C10H18O2/c1-3-4-5-6-7-8-9-10(11)12-2/h8-9H,3-7H2,1-2H3	C10H18O2	170.131	154.244	153.883	153.515	Lite	0	0	0	0	0	0	0	0	0	0
DTXCID1027637	Methyl (2E)-non-2-enoate	14952-06-8	CCCCCC\C=C\C(=O)OC	InChI=1S/C10H18O2/c1-3-4-5-6-7-8-9-10(11)12-2/h8-9H,3-7H2,1-2H3/b9-8+	InChI=1S/C10H18O2/c1-3-4-5-6-7-8-9-10(11)12-2/h8-9H,3-7H2,1-2H3/b9-8+	C10H18O2	170.131	154.217	154.053	153.832	Lite	0	0	0	0	0	0	0	0	0	0
DTXCID40210247	(3Z)-Hex-3-en-1-yl 2-methylpropanoate	41519-23-7	CC\C=C/CCOC(=O)C(C)C	InChI=1S/C10H18O2/c1-4-5-6-7-8-12-10(11)9(2)3/h5-6,9H,4,7-8H2,1-3H3/b6-5-	InChI=1S/C10H18O2/c1-4-5-6-7-8-12-10(11)9(2)3/h5-6,9H,4,7-8H2,1-3H3/b6-5-	C10H18O2	170.131	147.75	147.519	147.131	Lite	0	0	0	0	0	0	0	0	0	0
DTXCID4030465	Oct-1-en-3-yl acetate	2442-10-06	CCCCCC(OC(C)=O)C=C	InChI=1S/C10H18O2/c1-4-6-7-8-10(5-2)12-9(3)11/h5,10H,2,4,6-8H2,1,3H3_x000D_	InChI=1/C10H18O2/c1-4-6-7-8-10(5-2)12-9(3)11/h5,10H,2,4,6-8H2,1,3H3	C10H18O2	170.131	147.973	149.579	148.946	Lite	0	0	0	0	0	0	0	0	0	0
DTXCID5027437	alpha-Hexyl-gamma-butyrolactone	18436-37-8	CCCCCCC1CCOC1=O	InChI=1/C10H18O2/c1-2-3-4-5-6-9-7-8-12-10(9)11/h9H,2-8H2,1H3	InChI=1/C10H18O2/c1-2-3-4-5-6-9-7-8-12-10(9)11/h9H,2-8H2,1H3	C10H18O2	170.131	146.746	147.006	146.945	Lite	0	0	0	0	0	0	0	0	0	0
DTXCID6027551	epsilon-Decalactone	5579-78-2	CCCCC1CCCCC(=O)O1	InChI=1/C10H18O2/c1-2-3-6-9-7-4-5-8-10(11)12-9/h9H,2-8H2,1H3	InChI=1/C10H18O2/c1-2-3-6-9-7-4-5-8-10(11)12-9/h9H,2-8H2,1H3	C10H18O2	170.131	141.834	144.112	144.001	Lite	0	0	0	0	0	0	0	1	0	0
DTXCID70210452	(Z)-Hex-3-enyl butyrate	16491-36-4	CCCC(=O)OCC\C=C/CC	InChI=1S/C10H18O2/c1-3-5-6-7-9-12-10(11)8-4-2/h5-6H,3-4,7-9H2,1-2H3/b6-5-_x000D_	InChI=1S/C10H18O2/c1-3-5-6-7-9-12-10(11)8-4-2/h5-6H,3-4,7-9H2,1-2H3/b6-5-	C10H18O2	170.131	148.561	148.267	148.029	Lite	0	0	0	0	0	0	0	0	0	0
DTXCID705406	Hexyl methacrylate	142-09-6	CCCCCCOC(=O)C(C)=C	InChI=1S/C10H18O2/c1-4-5-6-7-8-12-10(11)9(2)3/h2,4-8H2,1,3H3	InChI=1S/C10H18O2/c1-4-5-6-7-8-12-10(11)9(2)3/h2,4-8H2,1,3H3	C10H18O2	170.131	147.954	147.27	146.957	Lite	0	0	0	0	0	0	0	0	0	0
DTXCID8024496	6-Pentyltetrahydro-2H-pyran-2-one	705-86-2	CCCCCC1CCCC(=O)O1	InChI=1/C10H18O2/c1-2-3-4-6-9-7-5-8-10(11)12-9/h9H,2-8H2,1H3	InChI=1/C10H18O2/c1-2-3-4-6-9-7-5-8-10(11)12-9/h9H,2-8H2,1H3	C10H18O2	170.131	146.964	146.673	146.267	Lite	0	0	0	0	0	0	0	0	0	0
DTXCID9027106	Citronellic acid	502-47-6	CC(CCC=C(C)C)CC(O)=O	InChI=1/C10H18O2/c1-8(2)5-4-6-9(3)7-10(11)12/h5,9H,4,6-7H2,1-3H3,(H,11,12)	InChI=1/C10H18O2/c1-8(2)5-4-6-9(3)7-10(11)12/h5,9H,4,6-7H2,1-3H3,(H,11,12)	C10H18O2	170.131			149.704	Lite	0	0	0	0	0	0	0	0	0	0
DTXCID5020154	N-[3-(Dimethylamino)propyl]methacrylamide	5205-93-6	CN(C)CCCNC(=O)C(C)=C	InChI=1S/C9H18N2O/c1-8(2)9(12)10-6-5-7-11(3)4/h1,5-7H2,2-4H3,(H,10,12)	InChI=1S/C9H18N2O/c1-8(2)9(12)10-6-5-7-11(3)4/h1,5-7H2,2-4H3,(H,10,12)	C9H18N2O	170.142	142.166	144.036	143.064	Lite	0	0	0	0	0	0	0	0	0	0
DTXCID0021541	2,8-Dimethylnonan-5-one	2050-99-9	CC(C)CCC(=O)CCC(C)C	InChI=1S/C11H22O/c1-9(2)5-7-11(12)8-6-10(3)4/h9-10H,5-8H2,1-4H3	InChI=1S/C11H22O/c1-9(2)5-7-11(12)8-6-10(3)4/h9-10H,5-8H2,1-4H3	C11H22O	170.167	153.371	153.033	152.628	Lite	0	0	0	0	0	0	0	0	0	0
DTXCID101623	2-Methyldecanal	19009-56-4	CCCCCCCCC(C)C=O	InChI=1S/C11H22O/c1-3-4-5-6-7-8-9-11(2)10-12/h10-11H,3-9H2,1-2H3_x000D_	InChI=1/C11H22O/c1-3-4-5-6-7-8-9-11(2)10-12/h10-11H,3-9H2,1-2H3	C11H22O	170.167	154.078	153.593	153.925	Lite	0	0	0	0	0	0	0	0	0	0
DTXCID301943	2-Undecanone	112-12-9	CCCCCCCCCC(C)=O	InChI=1S/C11H22O/c1-3-4-5-6-7-8-9-10-11(2)12/h3-10H2,1-2H3	InChI=1S/C11H22O/c1-3-4-5-6-7-8-9-10-11(2)12/h3-10H2,1-2H3	C11H22O	170.167	154.203	153.196	152.829	Lite	0	0	0	0	0	0	0	0	0	0
DTXCID7020716	4-(2-Methylbutan-2-yl)cyclohexanol	5349-51-9	CCC(C)(C)C1CCC(O)CC1	InChI=1S/C11H22O/c1-4-11(2,3)9-5-7-10(12)8-6-9/h9-10,12H,4-8H2,1-3H3	InChI=1S/C11H22O/c1-4-11(2,3)9-5-7-10(12)8-6-9/h9-10,12H,4-8H2,1-3H3	C11H22O	170.167	144.022	143.599	143.855	Lite	0	0	0	0	0	0	0	0	0	0
DTXCID907503	Isophorone diamine	2855-13-2	CC1(C)CC(N)CC(C)(CN)C1	InChI=1/C10H22N2/c1-9(2)4-8(12)5-10(3,6-9)7-11/h8H,4-7,11-12H2,1-3H3	InChI=1/C10H22N2/c1-9(2)4-8(12)5-10(3,6-9)7-11/h8H,4-7,11-12H2,1-3H3	C10H22N2	170.178	142.814	142.378	141.956	Lite	0	0	0	0	0	0	0	0	0	0
DTXCID8022034	2,2,4,6,6-Pentamethylheptane	13475-82-6	CC(CC(C)(C)C)CC(C)(C)C	InChI=1S/C12H26/c1-10(8-11(2,3)4)9-12(5,6)7/h10H,8-9H2,1-7H3_x000D_	InChI=1S/C12H26/c1-10(8-11(2,3)4)9-12(5,6)7/h10H,8-9H2,1-7H3	C12H26	170.203				NA	0	0	0	0	0	0	0	0	0	0
DTXCID906913	Dodecane	112-40-3	CCCCCCCCCCCC	InChI=1S/C12H26/c1-3-5-7-9-11-12-10-8-6-4-2/h3-12H2,1-2H3	InChI=1S/C12H26/c1-3-5-7-9-11-12-10-8-6-4-2/h3-12H2,1-2H3	C12H26	170.203				NA	0	0	0	0	0	0	0	0	0	0
DTXCID3012365	Dichlobenil	1194-65-6	ClC1=CC=CC(Cl)=C1C#N	InChI=1S/C7H3Cl2N/c8-6-2-1-3-7(9)5(6)4-10/h1-3H	InChI=1S/C7H3Cl2N/c8-6-2-1-3-7(9)5(6)4-10/h1-3H	C7H3Cl2N	170.964			119.206	Lite	0	0	0	0	0	0	0	0	0	0
DTXCID301867	4-Bromoaniline	106-40-1	NC1=CC=C(Br)C=C1	InChI=1S/C6H6BrN/c7-5-1-3-6(8)4-2-5/h1-4H,8H2	InChI=1S/C6H6BrN/c7-5-1-3-6(8)4-2-5/h1-4H,8H2	C6H6BrN	170.968	115.483	114.721	114.526	Lite	0	0	0	0	0	1	0	0	0	0
DTXCID6024414	3-Amino-4-chlorobenzoic acid	2840-28-0	NC1=C(Cl)C=CC(=C1)C(O)=O	InChI=1S/C7H6ClNO2/c8-5-2-1-4(7(10)11)3-6(5)9/h1-3H,9H2,(H,10,11)	InChI=1S/C7H6ClNO2/c8-5-2-1-4(7(10)11)3-6(5)9/h1-3H,9H2,(H,10,11)	C7H6ClNO2	171.009	130.182	129.103	129.19	Lite	0	0	0	0	0	0	0	0	0	0
DTXCID9021263	1-Chloro-2-methyl-3-nitrobenzene	83-42-1	CC1=C(C=CC=C1Cl)[N+]([O-])=O	InChI=1S/C7H6ClNO2/c1-5-6(8)3-2-4-7(5)9(10)11/h2-4H,1H3	InChI=1S/C7H6ClNO2/c1-5-6(8)3-2-4-7(5)9(10)11/h2-4H,1H3	C7H6ClNO2	171.009	128.941	128.503	127.998	Lite	0	0	0	0	0	0	0	0	0	0
DTXCID109105	4-Toluenesulfonamide	70-55-3	CC1=CC=C(C=C1)S(N)(=O)=O	InChI=1S/C7H9NO2S/c1-6-2-4-7(5-3-6)11(8,9)10/h2-5H,1H3,(H2,8,9,10)	InChI=1S/C7H9NO2S/c1-6-2-4-7(5-3-6)11(8,9)10/h2-5H,1H3,(H2,8,9,10)	C7H9NO2S	171.035			137.649	Lite	0	0	0	0	0	0	0	1	0	1
DTXCID301362	o-Toluenesulfonamide	88-19-7	CC1=C(C=CC=C1)S(N)(=O)=O	InChI=1S/C7H9NO2S/c1-6-4-2-3-5-7(6)11(8,9)10/h2-5H,1H3,(H2,8,9,10)	InChI=1S/C7H9NO2S/c1-6-4-2-3-5-7(6)11(8,9)10/h2-5H,1H3,(H2,8,9,10)	C7H9NO2S	171.035			134.678	Lite	0	0	0	0	0	0	1	0	0	1
DTXCID20892	Metronidazole	443-48-1	CC1=NC=C(N1CCO)[N+]([O-])=O	InChI=1S/C6H9N3O3/c1-5-7-4-6(9(11)12)8(5)2-3-10/h4,10H,2-3H2,1H3	InChI=1S/C6H9N3O3/c1-5-7-4-6(9(11)12)8(5)2-3-10/h4,10H,2-3H2,1H3	C6H9N3O3	171.064	136.964	137.21	136.934	Lite	0	0	0	0	0	0	0	1	0	0
DTXCID7027465	6-(1-Methylethyl)quinoline	135-79-5	CC(C)C1=CC2=CC=CN=C2C=C1	InChI=1S/C12H13N/c1-9(2)10-5-6-12-11(8-10)4-3-7-13-12/h3-9H,1-2H3	InChI=1S/C12H13N/c1-9(2)10-5-6-12-11(8-10)4-3-7-13-12/h3-9H,1-2H3	C12H13N	171.105	144.266	143.936	143.342	Lite	0	0	0	0	0	0	0	0	0	0
DTXCID9027156	2-(2-Butyl)-4,5-dimethyl-3-thiazoline	65894-82-8	CCC(C)C1SC(C)C(C)=N1	InChI=1/C9H17NS/c1-5-6(2)9-10-7(3)8(4)11-9/h6,8-9H,5H2,1-4H3	InChI=1/C9H17NS/c1-5-6(2)9-10-7(3)8(4)11-9/h6,8-9H,5H2,1-4H3	C9H17NS	171.108	144.957	144.722	144.118	Lite	0	0	0	0	0	0	0	0	0	0
DTXCID9030462	2-(Diethylamino)ethyl acrylate	2426-54-2	CCN(CC)CCOC(=O)C=C	InChI=1S/C9H17NO2/c1-4-9(11)12-8-7-10(5-2)6-3/h4H,1,5-8H2,2-3H3	InChI=1S/C9H17NO2/c1-4-9(11)12-8-7-10(5-2)6-3/h4H,1,5-8H2,2-3H3	C9H17NO2	171.126	144.633	145.06	144.993	Lite	0	0	0	0	0	0	0	0	0	0
DTXCID1024411	1,2,2,6,6-Pentamethylpiperidin-4-ol	2403-89-6	CN1C(C)(C)CC(O)CC1(C)C	InChI=1S/C10H21NO/c1-9(2)6-8(12)7-10(3,4)11(9)5/h8,12H,6-7H2,1-5H3	InChI=1S/C10H21NO/c1-9(2)6-8(12)7-10(3,4)11(9)5/h8,12H,6-7H2,1-5H3	C10H21NO	171.162	141.143	141.066	140.811	Lite	0	0	0	0	0	0	0	0	0	0
DTXCID707364	N,N-Dimethyloctanamide	1118-92-9	CCCCCCCC(=O)N(C)C	InChI=1S/C10H21NO/c1-4-5-6-7-8-9-10(12)11(2)3/h4-9H2,1-3H3	InChI=1S/C10H21NO/c1-4-5-6-7-8-9-10(12)11(2)3/h4-9H2,1-3H3	C10H21NO	171.162	151.846	151.827	151.494	Lite	0	0	0	0	0	0	0	0	0	0
DTXCID9012511	1,3,5-Triethylhexahydro-s-triazine	7779-27-3	CCN1CN(CC)CN(CC)C1	InChI=1S/C9H21N3/c1-4-10-7-11(5-2)9-12(6-3)8-10/h4-9H2,1-3H3	InChI=1S/C9H21N3/c1-4-10-7-11(5-2)9-12(6-3)8-10/h4-9H2,1-3H3	C9H21N3	171.173	144.789	144.54	144.2	Lite	0	0	0	0	0	0	0	0	0	0
DTXCID401557	Dibromomethane	74-95-3	BrCBr	InChI=1S/CH2Br2/c2-1-3/h1H2	InChI=1S/CH2Br2/c2-1-3/h1H2	CH2Br2	171.852				NA	0	0	0	0	0	0	0	0	0	0
DTXCID5031214	2-Bromophenol	95-56-7	OC1=C(Br)C=CC=C1	InChI=1S/C6H5BrO/c7-5-3-1-2-4-6(5)8/h1-4,8H	InChI=1S/C6H5BrO/c7-5-3-1-2-4-6(5)8/h1-4,8H	C6H5BrO	171.952	115.228	114.628	114.533	Lite	0	0	0	0	0	0	0	0	0	0
DTXCID201973	2-Chloro-4-nitroaniline	121-87-9	NC1=C(Cl)C=C(C=C1)[N+]([O-])=O	InChI=1S/C6H5ClN2O2/c7-5-3-4(9(10)11)1-2-6(5)8/h1-3H,8H2	InChI=1S/C6H5ClN2O2/c7-5-3-4(9(10)11)1-2-6(5)8/h1-3H,8H2	C6H5ClN2O2	172.004	129.927	129.346	128.853	Lite	0	0	0	0	0	0	0	0	0	0
DTXCID4018827	2-Chloro-5-nitroaniline	6283-25-6	NC1=CC(=CC=C1Cl)[N+]([O-])=O	InChI=1S/C6H5ClN2O2/c7-5-2-1-4(9(10)11)3-6(5)8/h1-3H,8H2	InChI=1S/C6H5ClN2O2/c7-5-2-1-4(9(10)11)3-6(5)8/h1-3H,8H2	C6H5ClN2O2	172.004	129.963	129.191	129.131	Lite	0	0	0	0	0	0	0	0	0	0
DTXCID8030891	4-Chloro-3-nitroaniline	635-22-3	NC1=CC(=C(Cl)C=C1)[N+]([O-])=O	InChI=1S/C6H5ClN2O2/c7-5-2-1-4(8)3-6(5)9(10)11/h1-3H,8H2	InChI=1S/C6H5ClN2O2/c7-5-2-1-4(8)3-6(5)9(10)11/h1-3H,8H2	C6H5ClN2O2	172.004	130.14	129.089	128.843	Lite	0	0	0	0	0	0	0	0	0	0
DTXCID503105	Calcium glycerophosphate hydrate	398143-83-4	O.[Ca++].OCC(O)COP([O-])([O-])=O	InChI=1S/C3H9O6P.Ca.H2O/c4-1-3(5)2-9-10(6,7)8;;/h3-5H,1-2H2,(H2,6,7,8);;1H2/q;+2;/p-2_x000D_	InChI=1/C3H9O6P/c4-1-3(5)2-9-10(6,7)8/h3-5H,1-2H2,(H2,6,7,8)	C3H9O6P	172.014	129.293	129.072	129.619	Lite	0	0	0	0	0	0	0	0	0	0
DTXCID406701, DTXCID406701, DTXCID5030113	4-Methylbenzenesulfonic acid hydrate, Sodium 4-methylbenzenesulfonate, 2,4,6-Trimethylpyridinium p-toluenesulfonate	6192-52-5, 657-84-1, 59229-09-3	O.CC1=CC=C(C=C1)S(O)(=O)=O	InChI=1S/C7H8O3S.H2O/c1-6-2-4-7(5-3-6)11(8,9)10;/h2-5H,1H3,(H,8,9,10);1H2	InChI=1S/C7H8O3S/c1-6-2-4-7(5-3-6)11(8,9)10/h2-5H,1H3,(H,8,9,10)	C7H8O3S	172.019			137.435	Lite	0	0	0	0	0	0	1	0	0	0
DTXCID6031122	Methyl benzenesulphonate	80-18-2	COS(=O)(=O)C1=CC=CC=C1	InChI=1S/C7H8O3S/c1-10-11(8,9)7-5-3-2-4-6-7/h2-6H,1H3_x000D_	InChI=1S/C7H8O3S/c1-10-11(8,9)7-5-3-2-4-6-7/h2-6H,1H3	C7H8O3S	172.019	135.938	135.377	134.818	Lite	0	0	0	0	0	0	0	0	0	0
DTXCID9025035, DTXCID9025035	2-Methylbenzenesulfonic acid, Sodium 2-methylbenzenesulfonate	88-20-0, 15046-75-0	CC1=CC=CC=C1S(O)(=O)=O	InChI=1S/C7H8O3S/c1-6-4-2-3-5-7(6)11(8,9)10/h2-5H,1H3,(H,8,9,10)_x000D_	InChI=1S/C7H8O3S/c1-6-4-2-3-5-7(6)11(8,9)10/h2-5H,1H3,(H,8,9,10)	C7H8O3S	172.019			134.762	Lite	0	0	0	0	0	0	0	0	0	0
DTXCID1021403	2-Chloro-1,4-dimethoxybenzene	2100-42-7	COC1=CC=C(OC)C(Cl)=C1	InChI=1S/C8H9ClO2/c1-10-6-3-4-8(11-2)7(9)5-6/h3-5H,1-2H3	InChI=1S/C8H9ClO2/c1-10-6-3-4-8(11-2)7(9)5-6/h3-5H,1-2H3	C8H9ClO2	172.029	133.835	132.931	132.92	Lite	0	0	0	0	0	0	0	0	0	0
DTXCID903622	Sulfanilamide	63-74-1	NC1=CC=C(C=C1)S(N)(=O)=O	InChI=1S/C6H8N2O2S/c7-5-1-3-6(4-2-5)11(8,9)10/h1-4H,7H2,(H2,8,9,10)	InChI=1S/C6H8N2O2S/c7-5-1-3-6(4-2-5)11(8,9)10/h1-4H,7H2,(H2,8,9,10)	C6H8N2O2S	172.031	137.243	136.499	136.334	Lite	0	0	0	0	0	0	0	1	0	0
DTXCID801715	Menadione	58-27-5	CC1=CC(=O)C2=C(C=CC=C2)C1=O	InChI=1S/C11H8O2/c1-7-6-10(12)8-4-2-3-5-9(8)11(7)13/h2-6H,1H3	InChI=1S/C11H8O2/c1-7-6-10(12)8-4-2-3-5-9(8)11(7)13/h2-6H,1H3	C11H8O2	172.052	140.158	139.678	139.73	Lite	0	0	0	0	0	0	0	0	0	0
DTXCID0018788	1,4-Cyclohexanedicarboxylic acid	1076-97-7	OC(=O)C1CCC(CC1)C(O)=O	InChI=1S/C8H12O4/c9-7(10)5-1-2-6(4-3-5)8(11)12/h5-6H,1-4H2,(H,9,10)(H,11,12)	InChI=1S/C8H12O4/c9-7(10)5-1-2-6(4-3-5)8(11)12/h5-6H,1-4H2,(H,9,10)(H,11,12)	C8H12O4	172.074			137.978	Lite	0	0	0	0	0	0	0	0	0	0
DTXCID80464	Diethyl maleate	141-05-9	CCOC(=O)\C=C/C(=O)OCC	InChI=1S/C8H12O4/c1-3-11-7(9)5-6-8(10)12-4-2/h5-6H,3-4H2,1-2H3/b6-5-	InChI=1S/C8H12O4/c1-3-11-7(9)5-6-8(10)12-4-2/h5-6H,3-4H2,1-2H3/b6-5-	C8H12O4	172.074	146.752	146.418	145.972	Lite	0	0	0	0	0	0	0	0	0	0
DTXCID9029643	2-Ethoxynaphthalene	93-18-5	CCOC1=CC2=C(C=CC=C2)C=C1	InChI=1S/C12H12O/c1-2-13-12-8-7-10-5-3-4-6-11(10)9-12/h3-9H,2H2,1H3_x000D_	InChI=1S/C12H12O/c1-2-13-12-8-7-10-5-3-4-6-11(10)9-12/h3-9H,2H2,1H3	C12H12O	172.089	144.521	143.57	143.405	Lite	0	0	0	0	0	0	0	0	0	0
DTXCID1018800	Butyl 4-oxopentanoate	2052-15-5	CCCCOC(=O)CCC(C)=O	InChI=1S/C9H16O3/c1-3-4-7-12-9(11)6-5-8(2)10/h3-7H2,1-2H3	InChI=1S/C9H16O3/c1-3-4-7-12-9(11)6-5-8(2)10/h3-7H2,1-2H3	C9H16O3	172.11	146.373	146.821	146.864	Lite	0	0	0	0	0	0	0	0	0	0
DTXCID80209756	4-Hydroxy-2,2,6,6-tetramethylpiperidin-1-yl)oxidanyl	2226-96-2	CC1(C)CC(O)CC(C)(C)N1[O]	InChI=1S/C9H18NO2/c1-8(2)5-7(11)6-9(3,4)10(8)12/h7,11H,5-6H2,1-4H3	InChI=1S/C9H18NO2/c1-8(2)5-7(11)6-9(3,4)10(8)12/h7,11H,5-6H2,1-4H3	C9H18NO2	172.134	140.656	140.069	140.103	Lite	0	0	0	0	0	0	0	0	0	0
DTXCID0027519	Hexyl isobutyrate	2349-07-07	CCCCCCOC(=O)C(C)C	InChI=1S/C10H20O2/c1-4-5-6-7-8-12-10(11)9(2)3/h9H,4-8H2,1-3H3	InChI=1S/C10H20O2/c1-4-5-6-7-8-12-10(11)9(2)3/h9H,4-8H2,1-3H3	C10H20O2	172.146	150.052	149.857	148.729	Lite	0	0	0	0	0	0	0	0	0	0
DTXCID106694	2-Ethylhexyl acetate	103-09-3	CCCCC(CC)COC(C)=O	InChI=1/C10H20O2/c1-4-6-7-10(5-2)8-12-9(3)11/h10H,4-8H2,1-3H3	InChI=1/C10H20O2/c1-4-6-7-10(5-2)8-12-9(3)11/h10H,4-8H2,1-3H3	C10H20O2	172.146	146.979	148.239	147.953	Lite	0	0	0	0	0	0	0	0	0	0
DTXCID201554	Decanoic acid	334-48-5	CCCCCCCCCC(O)=O	InChI=1S/C10H20O2/c1-2-3-4-5-6-7-8-9-10(11)12/h2-9H2,1H3,(H,11,12)	InChI=1S/C10H20O2/c1-2-3-4-5-6-7-8-9-10(11)12/h2-9H2,1H3,(H,11,12)	C10H20O2	172.146			151.235	Lite	0	0	0	0	0	0	0	0	0	0
DTXCID2021440	2-Methylbutyl isovalerate	2445-77-4	CCC(C)COC(=O)CC(C)C	InChI=1/C10H20O2/c1-5-9(4)7-12-10(11)6-8(2)3/h8-9H,5-7H2,1-4H3	InChI=1/C10H20O2/c1-5-9(4)7-12-10(11)6-8(2)3/h8-9H,5-7H2,1-4H3	C10H20O2	172.146	146.472	146.292	146.66	Lite	0	0	0	0	0	0	0	0	0	0
DTXCID4022232	7-Hydroxy-3,7-dimethyloctanal	107-75-5	CC(CCCC(C)(C)O)CC=O	InChI=1/C10H20O2/c1-9(6-8-11)5-4-7-10(2,3)12/h8-9,12H,4-7H2,1-3H3	InChI=1/C10H20O2/c1-9(6-8-11)5-4-7-10(2,3)12/h8-9,12H,4-7H2,1-3H3	C10H20O2	172.146	148.549	148.57	148.002	Lite	0	0	0	0	0	0	0	0	0	0
DTXCID6022218	Pentyl valerate	2173-56-0	CCCCCOC(=O)CCCC	InChI=1S/C10H20O2/c1-3-5-7-9-12-10(11)8-6-4-2/h3-9H2,1-2H3	InChI=1S/C10H20O2/c1-3-5-7-9-12-10(11)8-6-4-2/h3-9H2,1-2H3	C10H20O2	172.146	149.737	150.269	150.339	Lite	0	0	0	0	0	0	0	0	0	0
DTXCID6024202	Octyl acetate	112-14-1	CCCCCCCCOC(C)=O	InChI=1S/C10H20O2/c1-3-4-5-6-7-8-9-12-10(2)11/h3-9H2,1-2H3	InChI=1S/C10H20O2/c1-3-4-5-6-7-8-9-12-10(2)11/h3-9H2,1-2H3	C10H20O2	172.146	150.469	151.118	150.713	Lite	0	0	0	0	0	0	0	0	0	0
DTXCID6024757	3-Methylbutyl 3-methylbutanoate	659-70-1	CC(C)CCOC(=O)CC(C)C	InChI=1S/C10H20O2/c1-8(2)5-6-12-10(11)7-9(3)4/h8-9H,5-7H2,1-4H3	InChI=1S/C10H20O2/c1-8(2)5-6-12-10(11)7-9(3)4/h8-9H,5-7H2,1-4H3	C10H20O2	172.146	145.558	147.448	147.129	Lite	0	0	0	0	0	0	0	0	0	0
DTXCID6027559	Hexyl butyrate	2639-63-6	CCCCCCOC(=O)CCC	InChI=1S/C10H20O2/c1-3-5-6-7-9-12-10(11)8-4-2/h3-9H2,1-2H3	InChI=1S/C10H20O2/c1-3-5-6-7-9-12-10(11)8-4-2/h3-9H2,1-2H3	C10H20O2	172.146	150.369	150.365	149.888	Lite	0	0	0	0	0	0	0	0	0	0
DTXCID70210235	Acetaldehyde ethyl cis-3-hexenyl acetal	28069-74-1	CCOC(C)OCC\C=C/CC	InChI=1/C10H20O2/c1-4-6-7-8-9-12-10(3)11-5-2/h6-7,10H,4-5,8-9H2,1-3H3/b7-6-	InChI=1/C10H20O2/c1-4-6-7-8-9-12-10(3)11-5-2/h6-7,10H,4-5,8-9H2,1-3H3/b7-6-	C10H20O2	172.146	148.879	148.788	148.313	Lite	0	0	0	0	0	0	0	0	0	0
DTXCID9030094	Ethyl octanoate	106-32-1	CCCCCCCC(=O)OCC	InChI=1S/C10H20O2/c1-3-5-6-7-8-9-10(11)12-4-2/h3-9H2,1-2H3	InChI=1S/C10H20O2/c1-3-5-6-7-8-9-10(11)12-4-2/h3-9H2,1-2H3	C10H20O2	172.146	151.324	150.889	150.802	Lite	0	0	0	0	0	0	0	0	0	0
DTXCID1022188	N,N'-Dibutylurea	1792-17-2	CCCCNC(=O)NCCCC	InChI=1S/C9H20N2O/c1-3-5-7-10-9(12)11-8-6-4-2/h3-8H2,1-2H3,(H2,10,11,12)	InChI=1S/C9H20N2O/c1-3-5-7-10-9(12)11-8-6-4-2/h3-8H2,1-2H3,(H2,10,11,12)	C9H20N2O	172.158	149.957	145.844	145.933	Standard	0	0	1	0	0	0	0	0	0	0
DTXCID3024522	Tetraethylurea	1187-03-7	CCN(CC)C(=O)N(CC)CC	InChI=1S/C9H20N2O/c1-5-10(6-2)9(12)11(7-3)8-4/h5-8H2,1-4H3	InChI=1S/C9H20N2O/c1-5-10(6-2)9(12)11(7-3)8-4/h5-8H2,1-4H3	C9H20N2O	172.158	141.405	156.023	138.894	Standard	0	0	0	0	0	0	0	0	0	0
DTXCID706915	1-Undecanol	112-42-5	CCCCCCCCCCCO	InChI=1S/C11H24O/c1-2-3-4-5-6-7-8-9-10-11-12/h12H,2-11H2,1H3	InChI=1S/C11H24O/c1-2-3-4-5-6-7-8-9-10-11-12/h12H,2-11H2,1H3	C11H24O	172.183	155.714	154.911	154.947	Lite	0	0	0	0	0	0	0	0	0	0
DTXCID7024667	N,N'-Di-tert-butylethane-1,2-diamine	4062-60-6	CC(C)(C)NCCNC(C)(C)C	InChI=1S/C10H24N2/c1-9(2,3)11-7-8-12-10(4,5)6/h11-12H,7-8H2,1-6H3	InChI=1S/C10H24N2/c1-9(2,3)11-7-8-12-10(4,5)6/h11-12H,7-8H2,1-6H3	C10H24N2	172.194	149.225	148.711	148.76	Lite	0	0	0	0	0	0	0	0	0	0
DTXCID604464	4-Aminobenzenesulfonic acid	121-57-3	NC1=CC=C(C=C1)S(O)(=O)=O	InChI=1S/C6H7NO3S/c7-5-1-3-6(4-2-5)11(8,9)10/h1-4H,7H2,(H,8,9,10)_x000D_	InChI=1S/C6H7NO3S/c7-5-1-3-6(4-2-5)11(8,9)10/h1-4H,7H2,(H,8,9,10)	C6H7NO3S	173.015	136.16	135.487	135.981	Lite	0	0	0	0	0	0	0	0	0	0
DTXCID80209014	Azaserine	115-02-6	N[C@@H](COC(=O)C=[N+]=[N-])C(O)=O	InChI=1S/C5H7N3O4/c6-3(5(10)11)2-12-4(9)1-8-7/h1,3H,2,6H2,(H,10,11)/t3-/m0/s1	InChI=1S/C5H7N3O4/c6-3(5(10)11)2-12-4(9)1-8-7/h1,3H,2,6H2,(H,10,11)/t3-/m0/s1	C5H7N3O4	173.044	140.798	138.973	139.866	Lite	0	0	0	0	0	0	0	0	0	0
DTXCID8017495	Deisopropylatrazine	1007-28-9	CCNC1=NC(N)=NC(Cl)=N1	InChI=1S/C5H8ClN5/c1-2-8-5-10-3(6)9-4(7)11-5/h2H2,1H3,(H3,7,8,9,10,11)	InChI=1S/C5H8ClN5/c1-2-8-5-10-3(6)9-4(7)11-5/h2H2,1H3,(H3,7,8,9,10,11)	C5H8ClN5	173.047	137.379	149.886	132.647	Standard	0	1	0	0	0	0	0	0	0	0
DTXCID70978	1-Nitronaphthalene	86-57-7	[O-][N+](=O)C1=C2C=CC=CC2=CC=C1	InChI=1S/C10H7NO2/c12-11(13)10-7-3-5-8-4-1-2-6-9(8)10/h1-7H	InChI=1S/C10H7NO2/c12-11(13)10-7-3-5-8-4-1-2-6-9(8)10/h1-7H	C10H7NO2	173.048	136.713	138.251	132.431	Standard	0	0	0	0	0	0	0	0	0	0
DTXCID8021274	1-Phenyl-1H-pyrrole-2,5-dione	941-69-5	O=C1C=CC(=O)N1C1=CC=CC=C1	InChI=1S/C10H7NO2/c12-9-6-7-10(13)11(9)8-4-2-1-3-5-8/h1-7H	InChI=1S/C10H7NO2/c12-9-6-7-10(13)11(9)8-4-2-1-3-5-8/h1-7H	C10H7NO2	173.048	142.287	148.522	137.132	Standard	0	0	0	0	0	0	0	0	0	0
DTXCID0021591	Allidochlor	93-71-0	ClCC(=O)N(CC=C)CC=C	InChI=1S/C8H12ClNO/c1-3-5-10(6-4-2)8(11)7-9/h3-4H,1-2,5-7H2_x000D_	InChI=1S/C8H12ClNO/c1-3-5-10(6-4-2)8(11)7-9/h3-4H,1-2,5-7H2	C8H12ClNO	173.061	136.604	136.486	135.96	Lite	0	0	0	0	0	0	0	0	0	0
DTXCID4024517	3-Methyl-1-phenyl-1H-pyrazol-5-amine	1131-18-6	CC1=NN(C(N)=C1)C1=CC=CC=C1	InChI=1S/C10H11N3/c1-8-7-10(11)13(12-8)9-5-3-2-4-6-9/h2-7H,11H2,1H3	InChI=1S/C10H11N3/c1-8-7-10(11)13(12-8)9-5-3-2-4-6-9/h2-7H,11H2,1H3	C10H11N3	173.095	143.65	143.02	142.83	Lite	0	0	0	1	0	0	0	0	0	0
DTXCID2030148	1,3,3-Trimethyl-2-methyleneindoline	118-12-7	CN1C(=C)C(C)(C)C2=C1C=CC=C2	InChI=1S/C12H15N/c1-9-12(2,3)10-7-5-6-8-11(10)13(9)4/h5-8H,1H2,2-4H3_x000D_	InChI=1S/C12H15N/c1-9-12(2,3)10-7-5-6-8-11(10)13(9)4/h5-8H,1H2,2-4H3	C12H15N	173.12	142.322	141.986	141.993	Lite	0	0	0	0	0	0	0	0	0	0
DTXCID607153	1-Bromo-4-fluorobenzene	460-00-4	FC1=CC=C(Br)C=C1	InChI=1S/C6H4BrF/c7-5-1-3-6(8)4-2-5/h1-4H	InChI=1S/C6H4BrF/c7-5-1-3-6(8)4-2-5/h1-4H	C6H4BrF	173.948			108.46	Lite	0	0	0	0	0	0	0	0	0	0
DTXCID9030171	4-Chlorobenzoyl chloride	122-01-0	ClC(=O)C1=CC=C(Cl)C=C1	InChI=1S/C7H4Cl2O/c8-6-3-1-5(2-4-6)7(9)10/h1-4H	InChI=1S/C7H4Cl2O/c8-6-3-1-5(2-4-6)7(9)10/h1-4H	C7H4Cl2O	173.964	119.496	119.547	119.312	Lite	0	0	0	0	0	0	0	0	0	0
DTXCID1025061	Sodium 3-chloro-2-hydroxypropane-1-sulfonate	126-83-0	[Na+].OC(CCl)CS([O-])(=O)=O	InChI=1/C3H7ClO4S.Na/c4-1-3(5)2-9(6,7)8;/h3,5H,1-2H2,(H,6,7,8);/q;+1/p-1	InChI=1/C3H7ClO4S/c4-1-3(5)2-9(6,7)8/h3,5H,1-2H2,(H,6,7,8)	C3H7ClO4S	173.975	125.415	124.063	124.043	Lite	1	0	0	0	1	0	1	0	0	0
DTXCID3024780	1,4-Dichloro-2,5-dimethylbenzene	1124-05-6	CC1=CC(Cl)=C(C)C=C1Cl	InChI=1S/C8H8Cl2/c1-5-3-8(10)6(2)4-7(5)9/h3-4H,1-2H3	InChI=1S/C8H8Cl2/c1-5-3-8(10)6(2)4-7(5)9/h3-4H,1-2H3	C8H8Cl2	174			122.771	Lite	0	0	0	0	0	0	0	0	0	0
DTXCID7030856	1,2-Bis(chloromethyl)benzene	612-12-4	ClCC1=CC=CC=C1CCl	InChI=1S/C8H8Cl2/c9-5-7-3-1-2-4-8(7)6-10/h1-4H,5-6H2	InChI=1S/C8H8Cl2/c9-5-7-3-1-2-4-8(7)6-10/h1-4H,5-6H2	C8H8Cl2	174			121.068	Lite	0	0	0	0	0	0	0	0	0	0
DTXCID4024981	Phenyl dihydrogen phosphate	701-64-4	OP(O)(=O)OC1=CC=CC=C1	InChI=1S/C6H7O4P/c7-11(8,9)10-6-4-2-1-3-5-6/h1-5H,(H2,7,8,9)	InChI=1S/C6H7O4P/c7-11(8,9)10-6-4-2-1-3-5-6/h1-5H,(H2,7,8,9)	C6H7O4P	174.008			136.133	Lite	0	0	0	0	0	0	0	0	0	0
DTXCID901361	Toluene-2,4-diisocyanate	584-84-9	CC1=CC=C(C=C1N=C=O)N=C=O	InChI=1S/C9H6N2O2/c1-7-2-3-8(10-5-12)4-9(7)11-6-13/h2-4H,1H3	InChI=1S/C9H6N2O2/c1-7-2-3-8(10-5-12)4-9(7)11-6-13/h2-4H,1H3	C9H6N2O2	174.043	146.894	147.056	146.799	Lite	0	0	0	0	0	0	0	0	0	0
DTXCID201130	1-Phenyl-3-methyl-5-pyrazolone	89-25-8	CC1=NN(C(=O)C1)C1=CC=CC=C1	InChI=1S/C10H10N2O/c1-8-7-10(13)12(11-8)9-5-3-2-4-6-9/h2-6H,7H2,1H3	InChI=1S/C10H10N2O/c1-8-7-10(13)12(11-8)9-5-3-2-4-6-9/h2-6H,7H2,1H3	C10H10N2O	174.079	143.49	143.59	142.99	Lite	0	0	0	0	0	0	0	0	0	0
DTXCID0018732	Diethyl butanedioate	123-25-1	CCOC(=O)CCC(=O)OCC	InChI=1S/C8H14O4/c1-3-11-7(9)5-6-8(10)12-4-2/h3-6H2,1-2H3	InChI=1S/C8H14O4/c1-3-11-7(9)5-6-8(10)12-4-2/h3-6H2,1-2H3	C8H14O4	174.089	144.866	144.23	144.203	Lite	0	0	0	0	0	0	0	0	0	0
DTXCID00480	Dimethoxane	828-00-2	CC1CC(OC(C)=O)OC(C)O1	InChI=1/C8H14O4/c1-5-4-8(11-6(2)9)12-7(3)10-5/h5,7-8H,4H2,1-3H3	InChI=1/C8H14O4/c1-5-4-8(11-6(2)9)12-7(3)10-5/h5,7-8H,4H2,1-3H3	C8H14O4	174.089	139.447	139.371	139.059	Lite	0	0	0	0	0	0	0	0	0	0
DTXCID2024876	Ethylene glycol diglycidyl ether	2224-15-9	C(COCC1CO1)OCC1CO1	InChI=1/C8H14O4/c1(9-3-7-5-11-7)2-10-4-8-6-12-8/h7-8H,1-6H2	InChI=1/C8H14O4/c1(9-3-7-5-11-7)2-10-4-8-6-12-8/h7-8H,1-6H2	C8H14O4	174.089	144.917	144.484	144.436	Lite	0	0	0	0	0	0	0	0	0	0
DTXCID5021918	1,4-Bis(2-hydroxyethoxy)-2-butyne	1606-85-5	OCCOCC#CCOCCO	InChI=1S/C8H14O4/c9-3-7-11-5-1-2-6-12-8-4-10/h9-10H,3-8H2	InChI=1S/C8H14O4/c9-3-7-11-5-1-2-6-12-8-4-10/h9-10H,3-8H2	C8H14O4	174.089	148.005	147.69	149.301	Lite	0	0	0	0	0	0	0	0	0	0
DTXCID605096	Dimethyl adipate	627-93-0	COC(=O)CCCCC(=O)OC	InChI=1S/C8H14O4/c1-11-7(9)5-3-4-6-8(10)12-2/h3-6H2,1-2H3	InChI=1S/C8H14O4/c1-11-7(9)5-3-4-6-8(10)12-2/h3-6H2,1-2H3	C8H14O4	174.089	145.822	146.506	146.323	Lite	0	0	0	0	0	0	0	0	0	0
DTXCID8027163	6-Acetyl-1,2,3,4-tetrahydronaphthalene	774-55-0	CC(=O)C1=CC2=C(CCCC2)C=C1	InChI=1S/C12H14O/c1-9(13)11-7-6-10-4-2-3-5-12(10)8-11/h6-8H,2-5H2,1H3	InChI=1S/C12H14O/c1-9(13)11-7-6-10-4-2-3-5-12(10)8-11/h6-8H,2-5H2,1H3	C12H14O	174.105	146.086	145.467	145.117	Lite	0	0	0	0	0	0	0	0	0	0
DTXCID8024361	Hexanedihydrazide	1071-93-8	NNC(=O)CCCCC(=O)NN	InChI=1S/C6H14N4O2/c7-9-5(11)3-1-2-4-6(12)10-8/h1-4,7-8H2,(H,9,11)(H,10,12)	InChI=1S/C6H14N4O2/c7-9-5(11)3-1-2-4-6(12)10-8/h1-4,7-8H2,(H,9,11)(H,10,12)	C6H14N4O2	174.112	146.473	145.735	145.903	Lite	0	0	0	0	0	0	0	0	0	0
DTXCID2024587	3-[Ethyl(phenyl)amino]propanenitrile	148-87-8	CCN(CCC#N)C1=CC=CC=C1	InChI=1S/C11H14N2/c1-2-13(10-6-9-12)11-7-4-3-5-8-11/h3-5,7-8H,2,6,10H2,1H3	InChI=1S/C11H14N2/c1-2-13(10-6-9-12)11-7-4-3-5-8-11/h3-5,7-8H,2,6,10H2,1H3	C11H14N2	174.116	145.555	144.835	144.786	Lite	0	1	0	0	0	0	0	0	0	1
DTXCID908114	2-(Ethyl(3-methylphenyl)amino)acetonitrile	63133-74-4	CCN(CC#N)C1=CC(C)=CC=C1	InChI=1S/C11H14N2/c1-3-13(8-7-12)11-6-4-5-10(2)9-11/h4-6,9H,3,8H2,1-2H3	InChI=1S/C11H14N2/c1-3-13(8-7-12)11-6-4-5-10(2)9-11/h4-6,9H,3,8H2,1-2H3	C11H14N2	174.116	148.548	148.689	148.647	Lite	1	0	0	0	1	0	1	0	0	1
DTXCID8030974	2-Allyloxymethyl-2-ethylpropanediol	682-11-1	CCC(CO)(CO)COCC=C	InChI=1S/C9H18O3/c1-3-5-12-8-9(4-2,6-10)7-11/h3,10-11H,1,4-8H2,2H3_x000D_	InChI=1S/C9H18O3/c1-3-5-12-8-9(4-2,6-10)7-11/h3,10-11H,1,4-8H2,2H3	C9H18O3	174.126	144.472	143.251	142.898	Lite	0	0	0	0	0	0	0	0	0	0
DTXCID40210	Butyl-N-(4-hydroxybutyl)nitrosamine	3817-11-06	CCCCN(CCCCO)N=O	InChI=1S/C8H18N2O2/c1-2-3-6-10(9-12)7-4-5-8-11/h11H,2-8H2,1H3	InChI=1S/C8H18N2O2/c1-2-3-6-10(9-12)7-4-5-8-11/h11H,2-8H2,1H3	C8H18N2O2	174.137	149.916	147.944	147.888	Lite	0	0	0	0	0	0	0	0	0	0
DTXCID2024662	Ethyl octyl sulfide	3698-94-0	CCCCCCCCSCC	InChI=1S/C10H22S/c1-3-5-6-7-8-9-10-11-4-2/h3-10H2,1-2H3	InChI=1S/C10H22S/c1-3-5-6-7-8-9-10-11-4-2/h3-10H2,1-2H3	C10H22S	174.144				NA	0	0	0	0	0	0	0	0	0	0
DTXCID6022266	Pentyl sulfide	872-10-6	CCCCCSCCCCC	InChI=1S/C10H22S/c1-3-5-7-9-11-10-8-6-4-2/h3-10H2,1-2H3	InChI=1S/C10H22S/c1-3-5-7-9-11-10-8-6-4-2/h3-10H2,1-2H3	C10H22S	174.144				NA	0	0	0	0	0	0	0	0	0	0
DTXCID4024513	3,7-Dimethyloctane-1,7-diol	107-74-4	CC(CCO)CCCC(C)(C)O	InChI=1/C10H22O2/c1-9(6-8-11)5-4-7-10(2,3)12/h9,11-12H,4-8H2,1-3H3	InChI=1/C10H22O2/c1-9(6-8-11)5-4-7-10(2,3)12/h9,11-12H,4-8H2,1-3H3	C10H22O2	174.162	149.889	148.614	148.673	Lite	0	0	0	0	0	0	0	0	0	0
DTXCID5030612	1,1-Diethoxyhexane	3658-93-3	CCCCCC(OCC)OCC	InChI=1S/C10H22O2/c1-4-7-8-9-10(11-5-2)12-6-3/h10H,4-9H2,1-3H3_x000D_	InChI=1S/C10H22O2/c1-4-7-8-9-10(11-5-2)12-6-3/h10H,4-9H2,1-3H3	C10H22O2	174.162	151.941	151.031	150.835	Lite	0	0	0	0	0	0	0	0	0	0
DTXCID9021920	2-(2-Ethylhexyloxy)ethanol	1559-35-9	CCCCC(CC)COCCO	InChI=1/C10H22O2/c1-3-5-6-10(4-2)9-12-8-7-11/h10-11H,3-9H2,1-2H3	InChI=1/C10H22O2/c1-3-5-6-10(4-2)9-12-8-7-11/h10-11H,3-9H2,1-2H3	C10H22O2	174.162	148.559	149.016	149.184	Lite	0	0	0	0	0	0	0	0	0	0
DTXCID9027520	1,1-Dimethoxyoctane	10022-28-3	CCCCCCCC(OC)OC	InChI=1S/C10H22O2/c1-4-5-6-7-8-9-10(11-2)12-3/h10H,4-9H2,1-3H3	InChI=1S/C10H22O2/c1-4-5-6-7-8-9-10(11-2)12-3/h10H,4-9H2,1-3H3	C10H22O2	174.162	153.466	152.731	152.604	Lite	0	0	0	0	0	0	0	0	0	0
DTXCID5024710	2,6-Dichloro-3-methylaniline	64063-37-2	CC1=C(Cl)C(N)=C(Cl)C=C1	InChI=1S/C7H7Cl2N/c1-4-2-3-5(8)7(10)6(4)9/h2-3H,10H2,1H3	InChI=1S/C7H7Cl2N/c1-4-2-3-5(8)7(10)6(4)9/h2-3H,10H2,1H3	C7H7Cl2N	174.996	122.728	121.862	121.538	Lite	0	0	0	0	0	0	0	0	0	0
DTXCID70738	Indole-3-acetic acid	87-51-4	OC(=O)CC1=CNC2=C1C=CC=C2	InChI=1S/C10H9NO2/c12-10(13)5-7-6-11-9-4-2-1-3-8(7)9/h1-4,6,11H,5H2,(H,12,13)	InChI=1S/C10H9NO2/c12-10(13)5-7-6-11-9-4-2-1-3-8(7)9/h1-4,6,11H,5H2,(H,12,13)	C10H9NO2	175.063			140.837	Lite	0	0	1	0	0	0	0	0	0	0
DTXCID9030703	N-Ethylphthalimide	5022-29-7	CCN1C(=O)C2=CC=CC=C2C1=O	InChI=1S/C10H9NO2/c1-2-11-9(12)7-5-3-4-6-8(7)10(11)13/h3-6H,2H2,1H3_x000D_	InChI=1S/C10H9NO2/c1-2-11-9(12)7-5-3-4-6-8(7)10(11)13/h3-6H,2H2,1H3	C10H9NO2	175.063	141.451	140.689	140.804	Lite	0	0	0	0	0	0	0	0	0	0
DTXCID307928	2-Ethylhexyl nitrate	27247-96-7	CCCCC(CC)CO[N+]([O-])=O	InChI=1/C8H17NO3/c1-3-5-6-8(4-2)7-12-9(10)11/h8H,3-7H2,1-2H3	InChI=1/C8H17NO3/c1-3-5-6-8(4-2)7-12-9(10)11/h8H,3-7H2,1-2H3	C8H17NO3	175.121	147.265	146.515	146.385	Lite	0	0	0	0	0	0	0	0	0	0
DTXCID706619	Benzenesulfonyl chloride	98-09-9	ClS(=O)(=O)C1=CC=CC=C1	InChI=1S/C6H5ClO2S/c7-10(8,9)6-4-2-1-3-5-6/h1-5H	InChI=1S/C6H5ClO2S/c7-10(8,9)6-4-2-1-3-5-6/h1-5H	C6H5ClO2S	175.97	128.056	126.03	125.865	Lite	0	0	0	0	0	0	0	0	0	0
DTXCID7021362	2,4-Dichlorobenzyl alcohol	1777-82-8	OCC1=C(Cl)C=C(Cl)C=C1	InChI=1S/C7H6Cl2O/c8-6-2-1-5(4-10)7(9)3-6/h1-3,10H,4H2	InChI=1S/C7H6Cl2O/c8-6-2-1-5(4-10)7(9)3-6/h1-3,10H,4H2	C7H6Cl2O	175.98	121.71	121.211	120.908	Lite	0	0	0	0	0	0	0	0	0	0
DTXCID90427	2,6-Dichloro-1,4-benzenediamine	609-20-1	NC1=CC(Cl)=C(N)C(Cl)=C1	InChI=1S/C6H6Cl2N2/c7-4-1-3(9)2-5(8)6(4)10/h1-2H,9-10H2	InChI=1S/C6H6Cl2N2/c7-4-1-3(9)2-5(8)6(4)10/h1-2H,9-10H2	C6H6Cl2N2	175.991	121.051	120.185	119.913	Lite	0	0	0	0	0	1	0	0	0	0
NoDTXCID21, DTXCID0028084	Calcium L-ascorbate dihydrate, L-Ascorbic acid	5743-28-2, 50-81-7	O.O.[Ca++].OC[C@H](O)[C@H]1OC(=O)C(O)=C1[O-].OC[C@H](O)[C@H]1OC(=O)C(O)=C1[O-]	InChI=1S/2C6H8O6.Ca.2H2O/c2*7-1-2(8)5-3(9)4(10)6(11)12-5;;;/h2*2,5,7-10H,1H2;;2*1H2/q;;+2;;/p-2/t2*2-,5+;;;/m00.../s1	InChI=1S/C6H8O6/c7-1-2(8)5-3(9)4(10)6(11)12-5/h2-3,5,7-9H,1H2/t2-,3?,5+/m0/s1	C6H8O6	176.032	138.808	139.33	139.246	Lite	0	0	0	0	0	0	0	0	0	0
DTXCID0028084	Sodium erythorbate (1:1)	6381-77-7	[Na+].OC[C@@H](O)[C@H]1OC(=O)C(O)=C1[O-]	InChI=1S/C6H8O6.Na/c7-1-2(8)5-3(9)4(10)6(11)12-5;/h2,5,7-10H,1H2;/q;+1/p-1/t2-,5-;/m1./s1	InChI=1S/C6H8O6/c7-1-2(8)5-3(9)4(10)6(11)12-5/h2,5,7-10H,1H2/t2-,5-/m1/s1	C6H8O6	176.032	139.159	137.872	137.769	Lite	0	0	0	0	0	0	0	0	0	0
DTXCID0028084	Sodium L-ascorbate	134-03-2	[Na+].OC[C@H](O)[C@H]1OC(=O)C(O)=C1[O-]	InChI=1S/C6H8O6.Na/c7-1-2(8)5-3(9)4(10)6(11)12-5;/h2,5,7-10H,1H2;/q;+1/p-1/t2-,5+;/m0./s1	InChI=1S/C6H8O6/c7-1-2(8)5-3(9)4(10)6(11)12-5/h2,5,7-10H,1H2/t2-,5+/m0/s1	C6H8O6	176.032	136.773	136.252	136.817	Lite	0	0	0	0	0	0	0	0	0	0
DTXCID30209802	D-Glucuronolactone	32449-92-6	O[C@@H]1O[C@@H]2[C@@H](O)C(=O)O[C@@H]2[C@H]1O	InChI=1S/C6H8O6/c7-1-3-4(12-5(1)9)2(8)6(10)11-3/h1-5,7-9H/t1-,2-,3-,4-,5-/m1/s1	InChI=1S/C6H8O6/c7-1-3-4(12-5(1)9)2(8)6(10)11-3/h1-5,7-9H/t1-,2-,3-,4-,5-/m1/s1	C6H8O6	176.032	135.274	133.48	134.064	Lite	0	0	0	0	0	0	0	0	0	0
DTXCID805670, DTXCID805670	4-Methylumbelliferone hydrate, 4-Methylumbelliferone	103764-33-6, 90-33-5	O.CC1=CC(=O)OC2=C1C=CC(O)=C2	InChI=1S/C10H8O3.H2O/c1-6-4-10(12)13-9-5-7(11)2-3-8(6)9;/h2-5,11H,1H3;1H2	InChI=1S/C10H8O3/c1-6-4-10(12)13-9-5-7(11)2-3-8(6)9/h2-5,11H,1H3	C10H8O3	176.047	138.237	156.515	132.975	Standard	0	0	1	1	0	0	0	0	0	0
NoDTXCID22	1,2,3-Propanetriol, diacetate	25395-31-7	CC(=O)OCC(CO)OC(C)=O	InChI=1S/C7H12O5/c1-5(9)11-4-7(3-8)12-6(2)10/h7-8H,3-4H2,1-2H3_x000D_	InChI=1/C7H12O5/c1-5(9)11-4-7(3-8)12-6(2)10/h7-8H,3-4H2,1-2H3	C7H12O5	176.069	141.839	142.205	142.226	Lite	0	0	0	0	0	0	0	0	0	0
DTXCID302193	Benzyl methacrylate	2495-37-6	CC(=C)C(=O)OCC1=CC=CC=C1	InChI=1S/C11H12O2/c1-9(2)11(12)13-8-10-6-4-3-5-7-10/h3-7H,1,8H2,2H3	InChI=1S/C11H12O2/c1-9(2)11(12)13-8-10-6-4-3-5-7-10/h3-7H,1,8H2,2H3	C11H12O2	176.084	140.688	147.052	142.679	Standard	0	0	0	0	0	0	0	0	0	0
DTXCID40911500	Ethyl cinnamate	103-36-6	CCOC(=O)C=CC1=CC=CC=C1	InChI=1S/C11H12O2/c1-2-13-11(12)9-8-10-6-4-3-5-7-10/h3-9H,2H2,1H3	InChI=1S/C11H12O2/c1-2-13-11(12)9-8-10-6-4-3-5-7-10/h3-9H,2H2,1H3	C11H12O2	176.084	146.069	163.981	143.535	Standard	0	0	0	0	0	0	0	0	0	0
DTXCID90911671	3-Phenylprop-2-en-1-yl acetate	103-54-8	CC(=O)OCC=CC1=CC=CC=C1	InChI=1S/C11H12O2/c1-10(12)13-9-5-8-11-6-3-2-4-7-11/h2-8H,9H2,1H3	InChI=1S/C11H12O2/c1-10(12)13-9-5-8-11-6-3-2-4-7-11/h2-8H,9H2,1H3	C11H12O2	176.084	147.815	152.621	147.509	Standard	0	0	0	0	0	0	0	0	0	0
DTXCID4027577	Cotinine	486-56-6	CN1[C@@H](CCC1=O)C1=CN=CC=C1	InChI=1S/C10H12N2O/c1-12-9(4-5-10(12)13)8-3-2-6-11-7-8/h2-3,6-7,9H,4-5H2,1H3/t9-/m0/s1	InChI=1S/C10H12N2O/c1-12-9(4-5-10(12)13)8-3-2-6-11-7-8/h2-3,6-7,9H,4-5H2,1H3/t9-/m0/s1	C10H12N2O	176.095	147.01	162.078	142.03	Standard	0	0	0	0	0	0	0	1	0	0
DTXCID6024412	4-Methyl-1-phenylpyrazolidin-3-one	2654-57-1	CC1CN(NC1=O)C1=CC=CC=C1	InChI=1/C10H12N2O/c1-8-7-12(11-10(8)13)9-5-3-2-4-6-9/h2-6,8H,7H2,1H3,(H,11,13)	InChI=1/C10H12N2O/c1-8-7-12(11-10(8)13)9-5-3-2-4-6-9/h2-6,8H,7H2,1H3,(H,11,13)	C10H12N2O	176.095	144.131	153.26	144.55	Standard	0	0	0	0	0	0	0	0	0	0
DTXCID2021446	2-Phenylcyclohexanol	1444-64-0	OC1CCCCC1C1=CC=CC=C1	InChI=1/C12H16O/c13-12-9-5-4-8-11(12)10-6-2-1-3-7-10/h1-3,6-7,11-13H,4-5,8-9H2	InChI=1/C12H16O/c13-12-9-5-4-8-11(12)10-6-2-1-3-7-10/h1-3,6-7,11-13H,4-5,8-9H2	C12H16O	176.12	145.164	144.472	144.323	Lite	0	0	0	0	0	0	0	0	0	0
DTXCID1025067	Trisodium 2,4,6-trithioxo-1,3,5-triazinane-1,3,5-triide	17766-26-6	[Na+].[Na+].[Na+].S=C1[N-]C(=S)[N-]C(=S)[N-]1	InChI=1S/C3H3N3S3.3Na/c7-1-4-2(8)6-3(9)5-1;;;/h(H3,4,5,6,7,8,9);;;/q;3*+1/p-3	InChI=1S/C3H3N3S3/c7-1-4-2(8)6-3(9)5-1/h(H3,4,5,6,7,8,9)	C3H3N3S3	176.949	130.911	130.624	129.78	Lite	0	0	0	0	0	0	0	0	0	0
DTXCID1020720	4-Amino-2,6-dichlorophenol	5930-28-9	NC1=CC(Cl)=C(O)C(Cl)=C1	InChI=1S/C6H5Cl2NO/c7-4-1-3(9)2-5(8)6(4)10/h1-2,10H,9H2	InChI=1S/C6H5Cl2NO/c7-4-1-3(9)2-5(8)6(4)10/h1-2,10H,9H2	C6H5Cl2NO	176.975	121.035	120.06	119.768	Lite	0	0	0	0	0	1	0	0	0	0
DTXCID504397	Acetoacetanilide	102-01-2	CC(=O)CC(=O)NC1=CC=CC=C1	InChI=1S/C10H11NO2/c1-8(12)7-10(13)11-9-5-3-2-4-6-9/h2-6H,7H2,1H3,(H,11,13)	InChI=1S/C10H11NO2/c1-8(12)7-10(13)11-9-5-3-2-4-6-9/h2-6H,7H2,1H3,(H,11,13)	C10H11NO2	177.079	142.815	154.246	137.645	Standard	0	0	0	0	0	0	0	0	0	0
DTXCID901963	4-(Diethylamino)benzaldehyde	120-21-8	CCN(CC)C1=CC=C(C=O)C=C1	InChI=1S/C11H15NO/c1-3-12(4-2)11-7-5-10(9-13)6-8-11/h5-9H,3-4H2,1-2H3	InChI=1S/C11H15NO/c1-3-12(4-2)11-7-5-10(9-13)6-8-11/h5-9H,3-4H2,1-2H3	C11H15NO	177.115	147.655	149.552	149.164	Standard	0	0	0	0	0	0	0	0	0	0
DTXCID3020708	4-Hexylaniline	33228-45-4	CCCCCCC1=CC=C(N)C=C1	InChI=1S/C12H19N/c1-2-3-4-5-6-11-7-9-12(13)10-8-11/h7-10H,2-6,13H2,1H3	InChI=1S/C12H19N/c1-2-3-4-5-6-11-7-9-12(13)10-8-11/h7-10H,2-6,13H2,1H3	C12H19N	177.152	152.58	151.858	151.999	Lite	0	0	0	0	0	0	0	1	0	0
DTXCID302279	2,6-Diisopropylaniline	24544-04-5	CC(C)C1=CC=CC(C(C)C)=C1N	InChI=1S/C12H19N/c1-8(2)10-6-5-7-11(9(3)4)12(10)13/h5-9H,13H2,1-4H3	InChI=1S/C12H19N/c1-8(2)10-6-5-7-11(9(3)4)12(10)13/h5-9H,13H2,1-4H3	C12H19N	177.152	150.062	149.502	149.799	Lite	0	0	0	0	0	0	0	0	0	0
DTXCID6022189	N,N-Diisopropylaniline	4107-98-6	CC(C)N(C(C)C)C1=CC=CC=C1	InChI=1S/C12H19N/c1-10(2)13(11(3)4)12-8-6-5-7-9-12/h5-11H,1-4H3	InChI=1S/C12H19N/c1-10(2)13(11(3)4)12-8-6-5-7-9-12/h5-11H,1-4H3	C12H19N	177.152	147.364	146.604	146.021	Lite	0	0	0	0	0	0	0	0	0	0
DTXCID6030075	1,1,2,3-Tetrachloropropene	10436-39-2	ClCC(Cl)=C(Cl)Cl	InChI=1S/C3H2Cl4/c4-1-2(5)3(6)7/h1H2_x000D_	InChI=1S/C3H2Cl4/c4-1-2(5)3(6)7/h1H2	C3H2Cl4	177.891			97.8956	Lite	0	0	0	0	0	0	0	0	0	0
DTXCID307282	Phenyl phosphorus dichloride	644-97-3	ClP(Cl)C1=CC=CC=C1	InChI=1S/C6H5Cl2P/c7-9(8)6-4-2-1-3-5-6/h1-5H	InChI=1S/C6H5Cl2P/c7-9(8)6-4-2-1-3-5-6/h1-5H	C6H5Cl2P	177.951	117.809	117.38	117.018	Lite	0	0	0	0	0	0	0	0	0	0
DTXCID6018855	1-Chloro-2-(chloromethyl)-3-fluorobenzene	55117-15-2	FC1=C(CCl)C(Cl)=CC=C1	InChI=1S/C7H5Cl2F/c8-4-5-6(9)2-1-3-7(5)10/h1-3H,4H2	InChI=1S/C7H5Cl2F/c8-4-5-6(9)2-1-3-7(5)10/h1-3H,4H2	C7H5Cl2F	177.975			115.33	Lite	0	0	0	0	0	0	0	0	0	0
DTXCID6024200	Bis(2-carboxyethyl) sulfide	111-17-1	OC(=O)CCSCCC(O)=O	InChI=1S/C6H10O4S/c7-5(8)1-3-11-4-2-6(9)10/h1-4H2,(H,7,8)(H,9,10)	InChI=1S/C6H10O4S/c7-5(8)1-3-11-4-2-6(9)10/h1-4H2,(H,7,8)(H,9,10)	C6H10O4S	178.03			138.953	Lite	0	0	0	0	0	0	1	0	0	0
DTXCID2031162	1-Phenyltetrazole-5-thiol	86-93-1	S=C1N=NNN1C1=CC=CC=C1	InChI=1S/C7H6N4S/c12-7-8-9-10-11(7)6-4-2-1-3-5-6/h1-5H,(H,8,10,12)_x000D_	InChI=1S/C7H6N4S/c12-7-8-9-10-11(7)6-4-2-1-3-5-6/h1-5H,(H,8,10,12)	C7H6N4S	178.031	136.637	137.002	136.075	Lite	0	0	0	0	0	0	0	0	0	0
DTXCID2022252	4-(Dimethylamino)phenylthiocyanate	7152-80-9	CN(C)C1=CC=C(SC#N)C=C1	InChI=1S/C9H10N2S/c1-11(2)8-3-5-9(6-4-8)12-7-10/h3-6H,1-2H3	InChI=1S/C9H10N2S/c1-11(2)8-3-5-9(6-4-8)12-7-10/h3-6H,1-2H3	C9H10N2S	178.056	146.908	165.779	142.031	Standard	0	0	0	0	1	0	0	0	0	1
DTXCID7024534	4-Acetylphenyl acetate	13031-43-1	CC(=O)OC1=CC=C(C=C1)C(C)=O	InChI=1S/C10H10O3/c1-7(11)9-3-5-10(6-4-9)13-8(2)12/h3-6H,1-2H3	InChI=1S/C10H10O3/c1-7(11)9-3-5-10(6-4-9)13-8(2)12/h3-6H,1-2H3	C10H10O3	178.063	147.89	146.98	147.2	Lite	0	0	0	0	0	1	0	0	0	1
DTXCID8027165	7-Methyl-2H-1,5-benzodioxepin-3(4H)-one	28940-11-6	CC1=CC=C2OCC(=O)COC2=C1	InChI=1S/C10H10O3/c1-7-2-3-9-10(4-7)13-6-8(11)5-12-9/h2-4H,5-6H2,1H3	InChI=1S/C10H10O3/c1-7-2-3-9-10(4-7)13-6-8(11)5-12-9/h2-4H,5-6H2,1H3	C10H10O3	178.063	142.58	141.7	141.81	Lite	0	0	0	0	0	0	0	0	0	0
DTXCID203878	Anthracene	120-12-7	C1=CC2=CC3=C(C=CC=C3)C=C2C=C1	InChI=1S/C14H10/c1-2-6-12-10-14-8-4-3-7-13(14)9-11(12)5-1/h1-10H	InChI=1S/C14H10/c1-2-6-12-10-14-8-4-3-7-13(14)9-11(12)5-1/h1-10H	C14H10	178.078			142.275	Lite	0	0	0	0	0	0	0	0	0	0
DTXCID904254	Phenanthrene	85-01-8	C1=CC2=C(C=C1)C1=C(C=CC=C1)C=C2	InChI=1S/C14H10/c1-3-7-13-11(5-1)9-10-12-6-2-4-8-14(12)13/h1-10H	InChI=1S/C14H10/c1-3-7-13-11(5-1)9-10-12-6-2-4-8-14(12)13/h1-10H	C14H10	178.078			141.027	Lite	0	0	0	0	0	0	0	0	0	0
DTXCID4024698	Dibutan-2-yl disulfide	5943-30-6	CCC(C)SSC(C)CC	InChI=1/C8H18S2/c1-5-7(3)9-10-8(4)6-2/h7-8H,5-6H2,1-4H3	InChI=1/C8H18S2/c1-5-7(3)9-10-8(4)6-2/h7-8H,5-6H2,1-4H3	C8H18S2	178.085				NA	0	0	0	0	0	0	0	0	0	0
DTXCID6027474	1,8-Octanedithiol	1191-62-4	SCCCCCCCCS	InChI=1S/C8H18S2/c9-7-5-3-1-2-4-6-8-10/h9-10H,1-8H2	InChI=1S/C8H18S2/c9-7-5-3-1-2-4-6-8-10/h9-10H,1-8H2	C8H18S2	178.085			145.369	Lite	0	0	0	0	0	0	0	0	0	0
DTXCID0027648	3-Phenylpropyl acetate	122-72-5	CC(=O)OCCCC1=CC=CC=C1	InChI=1S/C11H14O2/c1-10(12)13-9-5-8-11-6-3-2-4-7-11/h2-4,6-7H,5,8-9H2,1H3	InChI=1S/C11H14O2/c1-10(12)13-9-5-8-11-6-3-2-4-7-11/h2-4,6-7H,5,8-9H2,1H3	C11H14O2	178.099	147.477	147.571	147.01	Lite	0	0	0	0	0	0	0	0	0	0
DTXCID1027716, DTXCID4032401	2-Ethoxy-5-(1-propenyl)phenol, trans-2-Ethoxy-5-(1-propenyl)phenol	94-86-0, None	CCOC1=C(O)C=C(C=CC)C=C1	InChI=1S/C11H14O2/c1-3-5-9-6-7-11(13-4-2)10(12)8-9/h3,5-8,12H,4H2,1-2H3	InChI=1S/C11H14O2/c1-3-5-9-6-7-11(13-4-2)10(12)8-9/h3,5-8,12H,4H2,1-2H3	C11H14O2	178.099	151.978	150.888	151.027	Lite	0	0	0	0	0	0	1	0	0	0
DTXCID3027166	4-(4-Methoxyphenyl)-2-butanone	104-20-1	COC1=CC=C(CCC(C)=O)C=C1	InChI=1S/C11H14O2/c1-9(12)3-4-10-5-7-11(13-2)8-6-10/h5-8H,3-4H2,1-2H3	InChI=1S/C11H14O2/c1-9(12)3-4-10-5-7-11(13-2)8-6-10/h5-8H,3-4H2,1-2H3	C11H14O2	178.099	148.54	148.04	147.787	Lite	0	0	0	0	0	0	0	0	0	0
DTXCID4015156	2-Phenylethyl propionate	122-70-3	CCC(=O)OCCC1=CC=CC=C1	InChI=1S/C11H14O2/c1-2-11(12)13-9-8-10-6-4-3-5-7-10/h3-7H,2,8-9H2,1H3	InChI=1S/C11H14O2/c1-2-11(12)13-9-8-10-6-4-3-5-7-10/h3-7H,2,8-9H2,1H3	C11H14O2	178.099	145.039	144.61	144.488	Lite	0	0	0	0	0	0	0	0	0	0
DTXCID40210580	4-Prop-1-enylveratrole	93-16-3	COC1=C(OC)C=C(C=CC)C=C1	InChI=1S/C11H14O2/c1-4-5-9-6-7-10(12-2)11(8-9)13-3/h4-8H,1-3H3	InChI=1S/C11H14O2/c1-4-5-9-6-7-10(12-2)11(8-9)13-3/h4-8H,1-3H3	C11H14O2	178.099	152.149	151.702	151.218	Lite	0	0	0	0	0	0	0	0	0	0
DTXCID4024567	3-(4-Methoxyphenyl)-2-methylpropanal	5462-06-06	COC1=CC=C(CC(C)C=O)C=C1	InChI=1S/C11H14O2/c1-9(8-12)7-10-3-5-11(13-2)6-4-10/h3-6,8-9H,7H2,1-2H3_x000D_	InChI=1/C11H14O2/c1-9(8-12)7-10-3-5-11(13-2)6-4-10/h3-6,8-9H,7H2,1-2H3	C11H14O2	178.099	150.389	149.649	149.708	Lite	0	0	0	0	0	0	0	0	0	0
DTXCID4027074	Isobutyl benzoate	120-50-3	CC(C)COC(=O)C1=CC=CC=C1	InChI=1S/C11H14O2/c1-9(2)8-13-11(12)10-6-4-3-5-7-10/h3-7,9H,8H2,1-2H3	InChI=1S/C11H14O2/c1-9(2)8-13-11(12)10-6-4-3-5-7-10/h3-7,9H,8H2,1-2H3	C11H14O2	178.099	147.63	148.467	148.021	Lite	0	0	0	0	0	0	0	0	0	0
DTXCID4027602	Benzyl 2-methylpropanoate	103-28-6	CC(C)C(=O)OCC1=CC=CC=C1	InChI=1S/C11H14O2/c1-9(2)11(12)13-8-10-6-4-3-5-7-10/h3-7,9H,8H2,1-2H3	InChI=1S/C11H14O2/c1-9(2)11(12)13-8-10-6-4-3-5-7-10/h3-7,9H,8H2,1-2H3	C11H14O2	178.099	146.811	146.718	146.73	Lite	0	0	0	0	0	0	0	0	0	0
DTXCID5027510	Benzyl butyrate	103-37-7	CCCC(=O)OCC1=CC=CC=C1	InChI=1S/C11H14O2/c1-2-6-11(12)13-9-10-7-4-3-5-8-10/h3-5,7-8H,2,6,9H2,1H3	InChI=1S/C11H14O2/c1-2-6-11(12)13-9-10-7-4-3-5-8-10/h3-5,7-8H,2,6,9H2,1H3	C11H14O2	178.099	146.431	145.831	145.633	Lite	0	0	0	0	0	0	0	0	0	0
DTXCID505607	Methyleugenol	93-15-2	COC1=CC=C(CC=C)C=C1OC	InChI=1S/C11H14O2/c1-4-5-9-6-7-10(12-2)11(8-9)13-3/h4,6-8H,1,5H2,2-3H3	InChI=1S/C11H14O2/c1-4-5-9-6-7-10(12-2)11(8-9)13-3/h4,6-8H,1,5H2,2-3H3	C11H14O2	178.099	151.363	150.756	150.486	Lite	0	0	0	0	0	0	0	0	0	0
DTXCID6020694	Butyl benzoate	136-60-7	CCCCOC(=O)C1=CC=CC=C1	InChI=1S/C11H14O2/c1-2-3-9-13-11(12)10-7-5-4-6-8-10/h4-8H,2-3,9H2,1H3	InChI=1S/C11H14O2/c1-2-3-9-13-11(12)10-7-5-4-6-8-10/h4-8H,2-3,9H2,1H3	C11H14O2	178.099	143.607	142.924	142.854	Lite	0	0	0	0	0	0	0	0	0	0
DTXCID7027091	1-Phenylethyl propionate	120-45-6	CCC(=O)OC(C)C1=CC=CC=C1	InChI=1/C11H14O2/c1-3-11(12)13-9(2)10-7-5-4-6-8-10/h4-9H,3H2,1-2H3	InChI=1/C11H14O2/c1-3-11(12)13-9(2)10-7-5-4-6-8-10/h4-9H,3H2,1-2H3	C11H14O2	178.099	147.616	147.233	146.748	Lite	0	0	0	0	0	0	0	0	0	0
DTXCID7027095	Ethyl hydrocinnamate	2021-28-5	CCOC(=O)CCC1=CC=CC=C1	InChI=1S/C11H14O2/c1-2-13-11(12)9-8-10-6-4-3-5-7-10/h3-7H,2,8-9H2,1H3	InChI=1S/C11H14O2/c1-2-13-11(12)9-8-10-6-4-3-5-7-10/h3-7H,2,8-9H2,1H3	C11H14O2	178.099	148.43	148.032	147.495	Lite	0	0	0	0	0	0	0	0	0	0
DTXCID8020703	4-tert-Butylbenzoic acid	98-73-7	CC(C)(C)C1=CC=C(C=C1)C(O)=O	InChI=1S/C11H14O2/c1-11(2,3)9-6-4-8(5-7-9)10(12)13/h4-7H,1-3H3,(H,12,13)	InChI=1S/C11H14O2/c1-11(2,3)9-6-4-8(5-7-9)10(12)13/h4-7H,1-3H3,(H,12,13)	C11H14O2	178.099			147.329	Lite	0	0	0	0	0	0	1	0	0	0
DTXCID4022490	Triethoxymethylsilane	2031-67-6	CCO[Si](C)(OCC)OCC	InChI=1S/C7H18O3Si/c1-5-8-11(4,9-6-2)10-7-3/h5-7H2,1-4H3	InChI=1S/C7H18O3Si/c1-5-8-11(4,9-6-2)10-7-3/h5-7H2,1-4H3	C7H18O3Si	178.102	140.58	140.325	139.961	Lite	0	0	0	0	0	0	0	0	0	0
DTXCID5021627	2-Amino-N-(1-methylethyl)benzamide	30391-89-0	CC(C)NC(=O)C1=C(N)C=CC=C1	InChI=1S/C10H14N2O/c1-7(2)12-10(13)8-5-3-4-6-9(8)11/h3-7H,11H2,1-2H3,(H,12,13)	InChI=1S/C10H14N2O/c1-7(2)12-10(13)8-5-3-4-6-9(8)11/h3-7H,11H2,1-2H3,(H,12,13)	C10H14N2O	178.111	143.834	142.725	143.166	Lite	0	0	0	0	0	0	0	1	0	0
DTXCID004368	2-[2-(2-Ethoxyethoxy)ethoxy]ethanol	112-50-5	CCOCCOCCOCCO	InChI=1S/C8H18O4/c1-2-10-5-6-12-8-7-11-4-3-9/h9H,2-8H2,1H3	InChI=1S/C8H18O4/c1-2-10-5-6-12-8-7-11-4-3-9/h9H,2-8H2,1H3	C8H18O4	178.12	146.628	146.516	146.685	Lite	0	0	0	0	0	0	0	0	0	0
DTXCID206224	Triethylene glycol dimethyl ether	112-49-2	COCCOCCOCCOC	InChI=1S/C8H18O4/c1-9-3-5-11-7-8-12-6-4-10-2/h3-8H2,1-2H3	InChI=1S/C8H18O4/c1-9-3-5-11-7-8-12-6-4-10-2/h3-8H2,1-2H3	C8H18O4	178.12	145.543	147.117	146.286	Lite	0	0	0	0	0	0	0	0	0	0
DTXCID1027710	4-Methyl-1-phenyl-2-pentanol	7779-78-4	CC(C)CC(O)CC1=CC=CC=C1	InChI=1/C12H18O/c1-10(2)8-12(13)9-11-6-4-3-5-7-11/h3-7,10,12-13H,8-9H2,1-2H3	InChI=1/C12H18O/c1-10(2)8-12(13)9-11-6-4-3-5-7-11/h3-7,10,12-13H,8-9H2,1-2H3	C12H18O	178.136	148.834	154.598	145.558	Standard	0	0	0	0	0	0	0	0	0	0
DTXCID103523	Propofol	2078-54-8	CC(C)C1=CC=CC(C(C)C)=C1O	InChI=1S/C12H18O/c1-8(2)10-6-5-7-11(9(3)4)12(10)13/h5-9,13H,1-4H3	InChI=1S/C12H18O/c1-8(2)10-6-5-7-11(9(3)4)12(10)13/h5-9,13H,1-4H3	C12H18O	178.136	144.614	150.987	138.56	Standard	0	0	0	0	0	0	0	0	0	0
DTXCID2024581	2-tert-Butyl-4-ethylphenol	96-70-8	CCC1=CC(=C(O)C=C1)C(C)(C)C	InChI=1S/C12H18O/c1-5-9-6-7-11(13)10(8-9)12(2,3)4/h6-8,13H,5H2,1-4H3	InChI=1S/C12H18O/c1-5-9-6-7-11(13)10(8-9)12(2,3)4/h6-8,13H,5H2,1-4H3	C12H18O	178.136	146.896	155.009	141.48	Standard	0	0	0	0	0	0	0	1	0	0
DTXCID2024822	3-Methyl-5-phenylpentan-1-ol	55066-48-3	CC(CCO)CCC1=CC=CC=C1	InChI=1/C12H18O/c1-11(9-10-13)7-8-12-5-3-2-4-6-12/h2-6,11,13H,7-10H2,1H3	InChI=1/C12H18O/c1-11(9-10-13)7-8-12-5-3-2-4-6-12/h2-6,11,13H,7-10H2,1H3	C12H18O	178.136	142.44	150.292	144.015	Standard	0	0	0	0	0	0	0	0	0	0
DTXCID4021551	6-tert-Butyl-2,4-dimethylphenol	1879-09-0	CC1=CC(C)=C(O)C(=C1)C(C)(C)C	InChI=1S/C12H18O/c1-8-6-9(2)11(13)10(7-8)12(3,4)5/h6-7,13H,1-5H3	InChI=1S/C12H18O/c1-8-6-9(2)11(13)10(7-8)12(3,4)5/h6-7,13H,1-5H3	C12H18O	178.136	143.762	148.037	137.446	Standard	0	0	0	0	0	0	0	0	0	0
DTXCID5022273	2,4-Diisopropylphenol	2934-05-06	CC(C)C1=CC(C(C)C)=C(O)C=C1	InChI=1S/C12H18O/c1-8(2)10-5-6-12(13)11(7-10)9(3)4/h5-9,13H,1-4H3	InChI=1S/C12H18O/c1-8(2)10-5-6-12(13)11(7-10)9(3)4/h5-9,13H,1-4H3	C12H18O	178.136	148.579	154.756	141.731	Standard	0	0	0	0	0	0	0	0	0	0
DTXCID5027439	Benzyl 3-methylbutyl ether	122-73-6	CC(C)CCOCC1=CC=CC=C1	InChI=1S/C12H18O/c1-11(2)8-9-13-10-12-6-4-3-5-7-12/h3-7,11H,8-10H2,1-2H3	InChI=1S/C12H18O/c1-11(2)8-9-13-10-12-6-4-3-5-7-12/h3-7,11H,8-10H2,1-2H3	C12H18O	178.136	148.631	154.515	146.156	Standard	0	0	0	0	0	0	0	0	0	0
DTXCID5023879	N4,N4-Diethyl-2-methylbenzene-1,4-diamine hydrochloride	2051-79-8	Cl.CCN(CC)C1=CC=C(N)C(C)=C1	InChI=1S/C11H18N2.ClH/c1-4-13(5-2)10-6-7-11(12)9(3)8-10;/h6-8H,4-5,12H2,1-3H3;1H_x000D_	InChI=1S/C11H18N2/c1-4-13(5-2)10-6-7-11(12)9(3)8-10/h6-8H,4-5,12H2,1-3H3	C11H18N2	178.147	149.177	149.667	149.567	Lite	0	0	0	0	0	0	0	0	0	0
DTXCID507803	N-Ethyl-N-(3-methylphenyl)ethane-1,2-diamine	19248-13-6	CCN(CCN)C1=CC(C)=CC=C1	InChI=1S/C11H18N2/c1-3-13(8-7-12)11-6-4-5-10(2)9-11/h4-6,9H,3,7-8,12H2,1-2H3	InChI=1S/C11H18N2/c1-3-13(8-7-12)11-6-4-5-10(2)9-11/h4-6,9H,3,7-8,12H2,1-2H3	C11H18N2	178.147	148.616	148.569	148.07	Lite	0	0	0	0	0	0	0	0	0	0
NoDTXCID23	Arsenobetaine	64436-13-1	C[As+](C)(C)CC([O-])=O	InChI=1S/C5H11AsO2/c1-6(2,3)4-5(7)8/h4H2,1-3H3	InChI=1S/C5H11AsO2/c1-6(2,3)4-5(7)8/h4H2,1-3H3/p+1	C5H12AsO2	179.005			120.943	Lite	0	0	0	0	0	0	0	0	0	0
DTXCID3021809	Cyclamic acid	100-88-9	OS(=O)(=O)NC1CCCCC1	InChI=1S/C6H13NO3S/c8-11(9,10)7-6-4-2-1-3-5-6/h6-7H,1-5H2,(H,8,9,10)	InChI=1S/C6H13NO3S/c8-11(9,10)7-6-4-2-1-3-5-6/h6-7H,1-5H2,(H,8,9,10)	C6H13NO3S	179.062	139.166	139.214	139.199	Lite	0	0	0	0	0	0	0	0	0	0
DTXCID804585	Benzo(f)quinoline	85-02-9	C1=CC=C2C(C=CC3=C2C=CC=N3)=C1	InChI=1S/C13H9N/c1-2-5-11-10(4-1)7-8-13-12(11)6-3-9-14-13/h1-9H	InChI=1S/C13H9N/c1-2-5-11-10(4-1)7-8-13-12(11)6-3-9-14-13/h1-9H	C13H9N	179.073	141.964	158.025	140.171	Standard	0	0	0	0	0	0	0	1	0	0
DTXCID00196816	Glucosamine hydrochloride	66-84-2	Cl.N[C@H]1C(O)O[C@H](CO)[C@@H](O)[C@@H]1O	InChI=1S/C6H13NO5.ClH/c7-3-5(10)4(9)2(1-8)12-6(3)11;/h2-6,8-11H,1,7H2;1H/t2-,3-,4-,5-,6?;/m1./s1	InChI=1S/C6H13NO5/c7-3-5(10)4(9)2(1-8)12-6(3)11/h2-6,8-11H,1,7H2/t2-,3-,4-,5-,6?/m1/s1	C6H13NO5	179.079	135.188	134.642	135.041	Lite	0	0	0	0	0	0	0	0	0	0
DTXCID00196816	Galactosamine hydrochloride	1772-03-8	Cl.N[C@H]1C(O)O[C@H](CO)[C@H](O)[C@@H]1O	InChI=1S/C6H13NO5.ClH/c7-3-5(10)4(9)2(1-8)12-6(3)11;/h2-6,8-11H,1,7H2;1H/t2-,3-,4+,5-,6?;/m1./s1	InChI=1S/C6H13NO5/c7-3-5(10)4(9)2(1-8)12-6(3)11/h2-6,8-11H,1,7H2/t2-,3-,4+,5-,6?/m1/s1	C6H13NO5	179.079	135.989	135.483	135.935	Lite	0	0	0	0	0	0	0	0	0	0
DTXCID001116	Phenacetin	62-44-2	CCOC1=CC=C(NC(C)=O)C=C1	InChI=1S/C10H13NO2/c1-3-13-10-6-4-9(5-7-10)11-8(2)12/h4-7H,3H2,1-2H3,(H,11,12)	InChI=1S/C10H13NO2/c1-3-13-10-6-4-9(5-7-10)11-8(2)12/h4-7H,3H2,1-2H3,(H,11,12)	C10H13NO2	179.095	150.06	160.62	148.668	Standard	0	0	0	0	0	0	0	1	0	1
DTXCID70766	Propham	122-42-9	CC(C)OC(=O)NC1=CC=CC=C1	InChI=1S/C10H13NO2/c1-8(2)13-10(12)11-9-6-4-3-5-7-9/h3-8H,1-2H3,(H,11,12)	InChI=1S/C10H13NO2/c1-8(2)13-10(12)11-9-6-4-3-5-7-9/h3-8H,1-2H3,(H,11,12)	C10H13NO2	179.095	142.16	141.969	141.874	Standard	0	0	0	0	0	0	1	0	0	1
DTXCID60694	Hexamethylphosphoramide	680-31-9	CN(C)P(=O)(N(C)C)N(C)C	InChI=1S/C6H18N3OP/c1-7(2)11(10,8(3)4)9(5)6/h1-6H3	InChI=1S/C6H18N3OP/c1-7(2)11(10,8(3)4)9(5)6/h1-6H3	C6H18N3OP	179.119	141.182	153.347	138.637	Standard	0	0	0	0	0	0	1	0	0	0
DTXCID101801	2-(N-Ethyl-m-toluidino)ethanol	91-88-3	CCN(CCO)C1=CC(C)=CC=C1	InChI=1S/C11H17NO/c1-3-12(7-8-13)11-6-4-5-10(2)9-11/h4-6,9,13H,3,7-8H2,1-2H3	InChI=1S/C11H17NO/c1-3-12(7-8-13)11-6-4-5-10(2)9-11/h4-6,9,13H,3,7-8H2,1-2H3	C11H17NO	179.131	148.167	152.878	148.406	Standard	0	0	0	0	0	0	0	1	0	0
DTXCID701965	1,2,4-Trichlorobenzene	120-82-1	ClC1=CC(Cl)=C(Cl)C=C1	InChI=1S/C6H3Cl3/c7-4-1-2-5(8)6(9)3-4/h1-3H	InChI=1S/C6H3Cl3/c7-4-1-2-5(8)6(9)3-4/h1-3H	C6H3Cl3	179.93			108.233	Lite	0	0	0	0	0	0	0	0	0	0
DTXCID706193	1,2,3-Trichlorobenzene	87-61-6	ClC1=CC=CC(Cl)=C1Cl	InChI=1S/C6H3Cl3/c7-4-2-1-3-5(8)6(4)9/h1-3H	InChI=1S/C6H3Cl3/c7-4-2-1-3-5(8)6(4)9/h1-3H	C6H3Cl3	179.93			108.312	Lite	0	0	0	0	0	0	0	0	0	0
DTXCID004821	1-Chloro-4-(trifluoromethyl)benzene	98-56-6	FC(F)(F)C1=CC=C(Cl)C=C1	InChI=1S/C7H4ClF3/c8-6-3-1-5(2-4-6)7(9,10)11/h1-4H	InChI=1S/C7H4ClF3/c8-6-3-1-5(2-4-6)7(9,10)11/h1-4H	C7H4ClF3	179.995			115.053	Lite	0	0	0	0	0	0	0	0	0	0
DTXCID1027683	2,5-Dimethyl-1,4-dithiane-2,5-diol	55704-78-4	CC1(O)CSC(C)(O)CS1	InChI=1/C6H12O2S2/c1-5(7)3-10-6(2,8)4-9-5/h7-8H,3-4H2,1-2H3	InChI=1/C6H12O2S2/c1-5(7)3-10-6(2,8)4-9-5/h7-8H,3-4H2,1-2H3	C6H12O2S2	180.028	135.48	132.59	132.467	Lite	0	0	0	0	0	0	0	0	0	0
DTXCID604485	2-Amino-6-methoxybenzothiazole	1747-60-0	COC1=CC2=C(C=C1)N=C(N)S2	InChI=1S/C8H8N2OS/c1-11-5-2-3-6-7(4-5)12-8(9)10-6/h2-4H,1H3,(H2,9,10)	InChI=1S/C8H8N2OS/c1-11-5-2-3-6-7(4-5)12-8(9)10-6/h2-4H,1H3,(H2,9,10)	C8H8N2OS	180.036	141.574	157.852	138.064	Standard	0	0	0	0	0	1	0	0	0	0
DTXCID50108	Aspirin	50-78-2	CC(=O)OC1=C(C=CC=C1)C(O)=O	InChI=1S/C9H8O4/c1-6(10)13-8-5-3-2-4-7(8)9(11)12/h2-5H,1H3,(H,11,12)	InChI=1S/C9H8O4/c1-6(10)13-8-5-3-2-4-7(8)9(11)12/h2-5H,1H3,(H,11,12)	C9H8O4	180.042	143.577	142.667	142.683	Lite	0	0	0	0	0	0	0	0	0	0
DTXCID7020001	Monomethyl phthalate	4376-18-5	COC(=O)C1=C(C=CC=C1)C(O)=O	InChI=1S/C9H8O4/c1-13-9(12)7-5-3-2-4-6(7)8(10)11/h2-5H,1H3,(H,10,11)	InChI=1S/C9H8O4/c1-13-9(12)7-5-3-2-4-6(7)8(10)11/h2-5H,1H3,(H,10,11)	C9H8O4	180.042	141.592	140.092	140.158	Lite	0	0	0	0	0	0	1	0	0	0
DTXCID7065257	myo-Inositol	87-89-8	O[C@H]1[C@H](O)[C@@H](O)[C@H](O)[C@H](O)[C@@H]1O	InChI=1/C6H12O6/c7-1-2(8)4(10)6(12)5(11)3(1)9/h1-12H/t1-,2-,3-,4+,5-,6-	InChI=1/C6H12O6/c7-1-2(8)4(10)6(12)5(11)3(1)9/h1-12H/t1-,2-,3-,4+,5-,6-	C6H12O6	180.063	137.607	137.163	137.101	Lite	0	0	0	0	0	0	0	0	0	0
DTXCID001336	Theophylline	58-55-9	CN1C2=C(NC=N2)C(=O)N(C)C1=O	InChI=1S/C7H8N4O2/c1-10-5-4(8-3-9-5)6(12)11(2)7(10)13/h3H,1-2H3,(H,8,9)	InChI=1S/C7H8N4O2/c1-10-5-4(8-3-9-5)6(12)11(2)7(10)13/h3H,1-2H3,(H,8,9)	C7H8N4O2	180.065	138.465	137.928	137.768	Lite	1	0	0	0	1	0	1	0	0	1
DTXCID2030853	1,7-Dimethylxanthine	611-59-6	CN1C=NC2=C1C(=O)N(C)C(=O)N2	InChI=1S/C7H8N4O2/c1-10-3-8-5-4(10)6(12)11(2)7(13)9-5/h3H,1-2H3,(H,9,13)	InChI=1S/C7H8N4O2/c1-10-3-8-5-4(10)6(12)11(2)7(13)9-5/h3H,1-2H3,(H,9,13)	C7H8N4O2	180.065	138.879	138.739	138.525	Lite	0	0	0	0	0	0	0	0	0	0
DTXCID506132	Theobromine	83-67-0	CN1C=NC2=C1C(=O)NC(=O)N2C	InChI=1S/C7H8N4O2/c1-10-3-8-5-4(10)6(12)9-7(13)11(5)2/h3H,1-2H3,(H,9,12,13)	InChI=1S/C7H8N4O2/c1-10-3-8-5-4(10)6(12)9-7(13)11(5)2/h3H,1-2H3,(H,9,12,13)	C7H8N4O2	180.065	138.98	138.74	138.884	Lite	0	1	0	0	0	0	0	0	0	1
DTXCID405857, DTXCID405857	1,10-Phenanthroline hydrochloride hydrate, 1,10-Phenanthroline	18851-33-7, 66-71-7	O.Cl.C1=CC2=C(N=C1)C1=C(C=CC=N1)C=C2	InChI=1S/C12H8N2.ClH.H2O/c1-3-9-5-6-10-4-2-8-14-12(10)11(9)13-7-1;;/h1-8H;1H;1H2	InChI=1S/C12H8N2/c1-3-9-5-6-10-4-2-8-14-12(10)11(9)13-7-1/h1-8H	C12H8N2	180.069	139.62	152.241	139.907	Standard	0	0	1	1	0	0	0	0	0	0
DTXCID602527	Propylparaben	94-13-3	CCCOC(=O)C1=CC=C(O)C=C1	InChI=1S/C10H12O3/c1-2-7-13-10(12)8-3-5-9(11)6-4-8/h3-6,11H,2,7H2,1H3	InChI=1S/C10H12O3/c1-2-7-13-10(12)8-3-5-9(11)6-4-8/h3-6,11H,2,7H2,1H3	C10H12O3	180.079	146.655	145.51	145.81	Lite	1	1	1	1	1	1	1	1	1	1
DTXCID7027126	Ethyl 2-methoxybenzoate	7335-26-4	CCOC(=O)C1=C(OC)C=CC=C1	InChI=1S/C10H12O3/c1-3-13-10(11)8-6-4-5-7-9(8)12-2/h4-7H,3H2,1-2H3	InChI=1S/C10H12O3/c1-3-13-10(11)8-6-4-5-7-9(8)12-2/h4-7H,3H2,1-2H3	C10H12O3	180.079	144.668	143.957	144.012	Lite	0	0	0	0	0	0	0	0	0	1
DTXCID9024770	4-Methoxybenzyl acetate	104-21-2	COC1=CC=C(COC(C)=O)C=C1	InChI=1S/C10H12O3/c1-8(11)13-7-9-3-5-10(12-2)6-4-9/h3-6H,7H2,1-2H3	InChI=1S/C10H12O3/c1-8(11)13-7-9-3-5-10(12-2)6-4-9/h3-6H,7H2,1-2H3	C10H12O3	180.079	149.549	148.702	148.696	Lite	0	0	0	0	0	0	0	0	0	0
DTXCID10580	Dulcin	150-69-6	CCOC1=CC=C(NC(N)=O)C=C1	InChI=1S/C9H12N2O2/c1-2-13-8-5-3-7(4-6-8)11-9(10)12/h3-6H,2H2,1H3,(H3,10,11,12)	InChI=1S/C9H12N2O2/c1-2-13-8-5-3-7(4-6-8)11-9(10)12/h3-6H,2H2,1H3,(H3,10,11,12)	C9H12N2O2	180.09	148.33	148.182	147.762	Lite	0	0	0	0	0	0	1	0	1	0
DTXCID507620	N-(3-Amino-4-methoxyphenyl)acetamide	6375-47-9	COC1=C(N)C=C(NC(C)=O)C=C1	InChI=1S/C9H12N2O2/c1-6(12)11-7-3-4-9(13-2)8(10)5-7/h3-5H,10H2,1-2H3,(H,11,12)	InChI=1S/C9H12N2O2/c1-6(12)11-7-3-4-9(13-2)8(10)5-7/h3-5H,10H2,1-2H3,(H,11,12)	C9H12N2O2	180.09	148.059	147.095	147.033	Lite	0	0	0	0	0	0	0	1	1	0
[truncated: 2,685 more rows]

## Sheet: BlindedScores
DTXCID	Mix499	Mix500	Mix501	Mix502	Mix503	Mix504	Mix505	Mix506	Mix507	Mix508
[truncated: 4,349 more rows]

[truncated: 3 more sheets: BlindedStats, UnblindedScores, UnblindedStats]
